# Supplementary material for: Nearly finished genomes produced using gel microdroplet culturing reveal substantial intraspecies genomic diversity within the human microbiome
Source: HighWire-hosted journal article supplement (doi:10.1101/gr.142208.112), 2013-03-14
Supplement: Supp_Data1.xlsx [file Supp_Data1.xlsx]

## Sheet: Streptococcus GMD-1
INDEL_position	Ref_Seq	Indel_seq	Length	Type	Product	CDS_start	CDS_end
382914	T	TC	1	Insertion	Intergenic region
411667	GAAAAAA	GAAAAA	1	Deletion	DNA/RNA helicase of DEAD/DEAH box family	411136	414000
777379	ATTTTT	ATTTTTT	1	Insertion	Intergenic region
783195	TAAAAA	TAAAAAA	1	Insertion	hypothetical protein	782734	783396
788520	ATTTTTTTT	ATTTTTTTTT,ATTTTTTTTTT	13	Insertion	Intergenic region
1059078	CTTTTTTT	CTTTTTTTTTT	3	Insertion	Intergenic region
1989384	CTT	CT	1	Deletion	Chromosome (plasmid) partitioning protein ParB / Stage 0 sporulation protein J	1989251	1989388

## Sheet: Streptococcus GMD-2
INDEL_position	Ref_Seq	Indel_seq	Length	Type	Product	CDS_start	CDS_end
12334	CTTTTT	CTTTTTTTT	3	Insertion	Response regulator of the competence regulon ComE	12020	12562
425774	ATTT	ATTTT	1	Insertion	Intergenic region
531747	TA	TAA	1	Insertion	Prophage Lp1 protein 6	531596	531976
666937	ATTTTT	ATTTTTTT	2	Insertion	S-adenosylmethionine:tRNA ribosyltransferase-isomerase (EC 5.-.-.-)	665910	666938
777379	ATTTTT	ATTTTTT	1	Insertion	Intergenic region
783195	TAAAAA	TAAAAAA	1	Insertion	hypothetical protein	782734	783396
1409470	CTTTTTT	CTTTTTTT	1	Insertion	Intergenic region

## Sheet: Streptococcus GMD-3
INDEL_position	Ref_Seq	Indel_seq	Length	Type	Product	CDS_start	CDS_end
12334	CTTTTT	CTTTTTTTT	3	Insertion	Response regulator of the competence regulon ComE	12020	12562
777379	ATTTTT	ATTTTTT,ATTTTTTT	10	Insertion	Intergenic region
783195	TAAAAA	TAAAAAA	1	Insertion	hypothetical protein	782734	783396
791185	ATAA	ATAAAAAGAGTAA	9	Insertion	Sortase A, LPXTG specific	791163	791909
1008120	TTGTTTTTCCAAT	TT	11	Deletion	Intergenic region
1025651	GTTTTT	GTTTTTT	1	Insertion	Intergenic region
1211093	CA	C	1	Deletion	Ribosomal small subunit pseudouridine synthase A (EC 4.2.1.70)	1210770	1211495
1211138	CAAAAA	CAAAAAA	1	Insertion	Ribosomal small subunit pseudouridine synthase A (EC 4.2.1.70)	1210770	1211495
1353586	TTTT	TTTTGTGGTTT	7	Insertion	hypothetical protein	1353163	1353897
1532885	GTTTT	GTTTTT	1	Insertion	Intergenic region
1535418	CAAAAAAA	CAAAAAA	1	Deletion	Intergenic region
1871499	TAAAAA	TAAAAAA	1	Insertion	Lead, cadmium, zinc and mercury transporting ATPase (EC 3.6.3.3) (EC 3.6.3.5); Copper-translocating P-type ATPase (EC 3.6.3.4)	1870494	1872716

## Sheet: Streptococcus GMD-4
INDEL_position	Ref_Seq	Indel_seq	Length	Type	Product	CDS_start	CDS_end
103301	CAAAAAAA	CAAAAAAAA	1	Insertion	Maltodextrose utilization protein MalA	102533	103333
524955	GAAAAA	GAAAA	1	Deletion	Intergenic region
575923	ATT	AT	1	Deletion	Cobalt-zinc-cadmium resistance protein	575453	576646
655521	T	TC	1	Insertion	Intergenic region
659770	GTTTTTTT	GTTTTTTTT	1	Insertion	Intergenic region
666937	ATTTTT	ATTTTTTT	2	Insertion	S-adenosylmethionine:tRNA ribosyltransferase-isomerase (EC 5.-.-.-)	665910	666938
1311941	GAA	GA	1	Deletion	Intergenic region
1362435	TAAAAA	TAAAA	1	Deletion	FIG01114631: hypothetical protein	1361570	1362523
1393241	ATTTT	ATTT	1	Deletion	Intergenic region
1409470	CTTTTTT	CTTTTTTT	1	Insertion	Intergenic region
1410766	AC	A	1	Deletion	Seryl-tRNA synthetase (EC 6.1.1.11)	1409492	1410766
1522589	CTTTTT	CTTTTTT	1	Insertion	Intergenic region
1871499	TAAAAA	TAAAAAA	1	Insertion	Lead, cadmium, zinc and mercury transporting ATPase (EC 3.6.3.3) (EC 3.6.3.5); Copper-translocating P-type ATPase (EC 3.6.3.4)	1870494	1872716
1883675	AGGGGG	AGGGGGG	1	Insertion	Phosphoglycolate phosphatase (EC 3.1.3.18)	1883622	1884251

## Sheet: Streptococcus GMD-5
INDEL_position	Ref_Seq	Indel_seq	Length	Type	Product	CDS_start	CDS_end
1989384	CTT	CT	1	Deletion	Chromosome (plasmid) partitioning protein ParB / Stage 0 sporulation protein J	1989251	1989388

## Sheet: Streptococcus GMD-6
INDEL_position	Ref_Seq	Indel_seq	Length	Type	Product	CDS_start	CDS_end
