# Supplementary material for: Nearly finished genomes produced using gel microdroplet culturing reveal substantial intraspecies genomic diversity within the human microbiome
Source: HighWire-hosted journal article supplement (doi:10.1101/gr.142208.112), 2013-03-14
Supplement: Supp_Data2.xlsx [file Supp_Data2.xlsx]

## Sheet: Streptococcus GMD-1
SNP_position	Ref_codon	Sub_codon	aa_Ref	aa_Sub	Synonymous	Product	CDS_start	CDS_end	CDS_strand
24	C	T				Intergenic region
27	G	A				Intergenic region
60	ACT	ACC	T	T	Yes	Chromosomal replication initiator protein DnaA	43	651	1
111	CAT	CAC	H	H	Yes	Chromosomal replication initiator protein DnaA	43	651	1
141	CTG	CTA	L	L	Yes	Chromosomal replication initiator protein DnaA	43	651	1
147	TAT	TAC	Y	Y	Yes	Chromosomal replication initiator protein DnaA	43	651	1
156	GGT	GGC	G	G	Yes	Chromosomal replication initiator protein DnaA	43	651	1
372	GGA	GGG	G	G	Yes	Chromosomal replication initiator protein DnaA	43	651	1
402	GCG	GCA	A	A	Yes	Chromosomal replication initiator protein DnaA	43	651	1
420	TAC	TAT	Y	Y	Yes	Chromosomal replication initiator protein DnaA	43	651	1
471	TTC	TTT	F	F	Yes	Chromosomal replication initiator protein DnaA	43	651	1
474	GGA	GGT	G	G	Yes	Chromosomal replication initiator protein DnaA	43	651	1
480	AAA	AAG	K	K	Yes	Chromosomal replication initiator protein DnaA	43	651	1
495	GTT	GTG	V	V	Yes	Chromosomal replication initiator protein DnaA	43	651	1
749	GGT	GGG	G	G	Yes	GTP-binding and nucleic acid-binding protein YchF	615	1697	1
782	GAC	GAT	D	D	Yes	GTP-binding and nucleic acid-binding protein YchF	615	1697	1
797	GTA	GTT	V	V	Yes	GTP-binding and nucleic acid-binding protein YchF	615	1697	1
800	GTT	GTA	V	V	Yes	GTP-binding and nucleic acid-binding protein YchF	615	1697	1
824	GTG	GTT	V	V	Yes	GTP-binding and nucleic acid-binding protein YchF	615	1697	1
893	GAA	GAG	E	E	Yes	GTP-binding and nucleic acid-binding protein YchF	615	1697	1
971	AAA	AAG	K	K	Yes	GTP-binding and nucleic acid-binding protein YchF	615	1697	1
977	TCA	TCT	S	S	Yes	GTP-binding and nucleic acid-binding protein YchF	615	1697	1
980	GTA	GTG	V	V	Yes	GTP-binding and nucleic acid-binding protein YchF	615	1697	1
1157	GAA	GAG	E	E	Yes	GTP-binding and nucleic acid-binding protein YchF	615	1697	1
1163	AAG	AAA	K	K	Yes	GTP-binding and nucleic acid-binding protein YchF	615	1697	1
1166	GTT	GTA	V	V	Yes	GTP-binding and nucleic acid-binding protein YchF	615	1697	1
1187	TTG	TTA	L	L	Yes	GTP-binding and nucleic acid-binding protein YchF	615	1697	1
1232	GTT	GTA	V	V	Yes	GTP-binding and nucleic acid-binding protein YchF	615	1697	1
1236	GGA	TCA	G	S	No	GTP-binding and nucleic acid-binding protein YchF	615	1697	1
1237	G	C	Merged with SNP 1236
1241	GAC	GAT	D	D	Yes	GTP-binding and nucleic acid-binding protein YchF	615	1697	1
1266	AAA	CAA	K	Q	No	GTP-binding and nucleic acid-binding protein YchF	615	1697	1
1349	GAC	GAT	D	D	Yes	GTP-binding and nucleic acid-binding protein YchF	615	1697	1
1355	GAG	GAA	E	E	Yes	GTP-binding and nucleic acid-binding protein YchF	615	1697	1
1400	GGC	GGT	G	G	Yes	GTP-binding and nucleic acid-binding protein YchF	615	1697	1
1516	GCA	GTA	A	V	No	GTP-binding and nucleic acid-binding protein YchF	615	1697	1
1550	GGG	GGC	G	G	Yes	GTP-binding and nucleic acid-binding protein YchF	615	1697	1
1625	GGG	GGA	G	G	Yes	GTP-binding and nucleic acid-binding protein YchF	615	1697	1
1701	T	C				Intergenic region
1776	ACC	ACT	T	T	Yes	Peptidyl-tRNA hydrolase (EC 3.1.1.29)	1771	2340	1
1788	GTA	GTT	V	V	Yes	Peptidyl-tRNA hydrolase (EC 3.1.1.29)	1771	2340	1
1794	TTG	TTA	L	L	Yes	Peptidyl-tRNA hydrolase (EC 3.1.1.29)	1771	2340	1
1821	GAA	GAG	E	E	Yes	Peptidyl-tRNA hydrolase (EC 3.1.1.29)	1771	2340	1
1878	GTC	GTT	V	V	Yes	Peptidyl-tRNA hydrolase (EC 3.1.1.29)	1771	2340	1
1950	CTC	CTG	L	L	Yes	Peptidyl-tRNA hydrolase (EC 3.1.1.29)	1771	2340	1
2052	GAT	GAC	D	D	Yes	Peptidyl-tRNA hydrolase (EC 3.1.1.29)	1771	2340	1
2067	GTT	GTC	V	V	Yes	Peptidyl-tRNA hydrolase (EC 3.1.1.29)	1771	2340	1
2094	GGG	GGA	G	G	Yes	Peptidyl-tRNA hydrolase (EC 3.1.1.29)	1771	2340	1
2100	GCT	GCG	A	A	Yes	Peptidyl-tRNA hydrolase (EC 3.1.1.29)	1771	2340	1
2139	ATA	ATT	I	I	Yes	Peptidyl-tRNA hydrolase (EC 3.1.1.29)	1771	2340	1
2142	GGT	GGA	G	G	Yes	Peptidyl-tRNA hydrolase (EC 3.1.1.29)	1771	2340	1
2148	CAG	CAA	Q	Q	Yes	Peptidyl-tRNA hydrolase (EC 3.1.1.29)	1771	2340	1
2149	ATA	GTA	I	V	No	Peptidyl-tRNA hydrolase (EC 3.1.1.29)	1771	2340	1
2199	TCC	TCG	S	S	Yes	Peptidyl-tRNA hydrolase (EC 3.1.1.29)	1771	2340	1
2206	CAT	AAT	H	N	No	Peptidyl-tRNA hydrolase (EC 3.1.1.29)	1771	2340	1
2229	GAT	GAA	D	E	No	Peptidyl-tRNA hydrolase (EC 3.1.1.29)	1771	2340	1
2259	TCC	TCT	S	S	Yes	Peptidyl-tRNA hydrolase (EC 3.1.1.29)	1771	2340	1
2334	AAC	AAT	N	N	Yes	Peptidyl-tRNA hydrolase (EC 3.1.1.29)	1771	2340	1
2337	GGC	GGT	G	G	Yes	Peptidyl-tRNA hydrolase (EC 3.1.1.29)	1771	2340	1
2376	GAC	GAT	D	D	Yes	Transcription-repair coupling factor	2341	5844	1
2455	ATT	CTT	I	L	No	Transcription-repair coupling factor	2341	5844	1
2472	AGT	AGC	S	S	Yes	Transcription-repair coupling factor	2341	5844	1
2577	CCA	CCT	P	P	Yes	Transcription-repair coupling factor	2341	5844	1
2586	GTT	GTC	V	V	Yes	Transcription-repair coupling factor	2341	5844	1
2592	GAC	GAT	D	D	Yes	Transcription-repair coupling factor	2341	5844	1
2649	GAG	GAA	E	E	Yes	Transcription-repair coupling factor	2341	5844	1
2666	AGT	AAT	S	N	No	Transcription-repair coupling factor	2341	5844	1
2673	CCG	CCA	P	P	Yes	Transcription-repair coupling factor	2341	5844	1
2686	ATT	GTT	I	V	No	Transcription-repair coupling factor	2341	5844	1
2703	ATC	ATT	I	I	Yes	Transcription-repair coupling factor	2341	5844	1
2769	GTT	GTC	V	V	Yes	Transcription-repair coupling factor	2341	5844	1
2772	GGC	GGT	G	G	Yes	Transcription-repair coupling factor	2341	5844	1
2804	CAG	CGG	Q	R	No	Transcription-repair coupling factor	2341	5844	1
2820	GGC	GGA	G	G	Yes	Transcription-repair coupling factor	2341	5844	1
2843	CGG	CAG	R	Q	No	Transcription-repair coupling factor	2341	5844	1
2874	GAT	GAC	D	D	Yes	Transcription-repair coupling factor	2341	5844	1
2994	ACC	ACA	T	T	Yes	Transcription-repair coupling factor	2341	5844	1
3120	GAG	GAT	E	D	No	Transcription-repair coupling factor	2341	5844	1
3190	GAA	AAA	E	K	No	Transcription-repair coupling factor	2341	5844	1
3193	ACA	GCA	T	A	No	Transcription-repair coupling factor	2341	5844	1
3274	TCC	GCC	S	A	No	Transcription-repair coupling factor	2341	5844	1
3336	TCT	TCC	S	S	Yes	Transcription-repair coupling factor	2341	5844	1
3338	GGG	GAG	G	E	No	Transcription-repair coupling factor	2341	5844	1
3402	TCC	TCT	S	S	Yes	Transcription-repair coupling factor	2341	5844	1
3426	AAT	AAC	N	N	Yes	Transcription-repair coupling factor	2341	5844	1
3429	CTT	CTC	L	L	Yes	Transcription-repair coupling factor	2341	5844	1
3465	CCC	CCA	P	P	Yes	Transcription-repair coupling factor	2341	5844	1
3529	AAC	GAC	N	D	No	Transcription-repair coupling factor	2341	5844	1
3541	ATT	GTT	I	V	No	Transcription-repair coupling factor	2341	5844	1
3573	AAG	AAA	K	K	Yes	Transcription-repair coupling factor	2341	5844	1
3576	ACG	ACA	T	T	Yes	Transcription-repair coupling factor	2341	5844	1
3582	GAA	GAG	E	E	Yes	Transcription-repair coupling factor	2341	5844	1
3620	AGA	AAA	R	K	No	Transcription-repair coupling factor	2341	5844	1
3687	CAC	CAT	H	H	Yes	Transcription-repair coupling factor	2341	5844	1
3749	CGT	CAT	R	H	No	Transcription-repair coupling factor	2341	5844	1
3789	TTG	TTA	L	L	Yes	Transcription-repair coupling factor	2341	5844	1
3819	GAC	GAT	D	D	Yes	Transcription-repair coupling factor	2341	5844	1
3822	TAC	TAT	Y	Y	Yes	Transcription-repair coupling factor	2341	5844	1
3864	ATT	ATC	I	I	Yes	Transcription-repair coupling factor	2341	5844	1
3880	AAA	CAA	K	Q	No	Transcription-repair coupling factor	2341	5844	1
3885	GGG	GGC	G	G	Yes	Transcription-repair coupling factor	2341	5844	1
4086	AAG	AAA	K	K	Yes	Transcription-repair coupling factor	2341	5844	1
4212	ATT	ATC	I	I	Yes	Transcription-repair coupling factor	2341	5844	1
4218	AGG	AGA	R	R	Yes	Transcription-repair coupling factor	2341	5844	1
4236	CAT	CAC	H	H	Yes	Transcription-repair coupling factor	2341	5844	1
4252	CTG	TTG	L	L	Yes	Transcription-repair coupling factor	2341	5844	1
4260	GGG	GGA	G	G	Yes	Transcription-repair coupling factor	2341	5844	1
4284	GAG	GAA	E	E	Yes	Transcription-repair coupling factor	2341	5844	1
4287	GTT	GTA	V	V	Yes	Transcription-repair coupling factor	2341	5844	1
4299	GCA	GCT	A	A	Yes	Transcription-repair coupling factor	2341	5844	1
4302	GCA	GCT	A	A	Yes	Transcription-repair coupling factor	2341	5844	1
4311	GCT	GCA	A	A	Yes	Transcription-repair coupling factor	2341	5844	1
4335	GTT	GTC	V	V	Yes	Transcription-repair coupling factor	2341	5844	1
4347	CCG	CCA	P	P	Yes	Transcription-repair coupling factor	2341	5844	1
4578	TTC	TTT	F	F	Yes	Transcription-repair coupling factor	2341	5844	1
4584	GTT	GTC	V	V	Yes	Transcription-repair coupling factor	2341	5844	1
4653	ATC	ATT	I	I	Yes	Transcription-repair coupling factor	2341	5844	1
4686	ATT	ATC	I	I	Yes	Transcription-repair coupling factor	2341	5844	1
4810	GTT	ATT	V	I	No	Transcription-repair coupling factor	2341	5844	1
4830	AAA	AAG	K	K	Yes	Transcription-repair coupling factor	2341	5844	1
4857	TCA	TCG	S	S	Yes	Transcription-repair coupling factor	2341	5844	1
4926	TTA	TTG	L	L	Yes	Transcription-repair coupling factor	2341	5844	1
4932	AAT	AAC	N	N	Yes	Transcription-repair coupling factor	2341	5844	1
4941	CTT	CTG	L	L	Yes	Transcription-repair coupling factor	2341	5844	1
5046	CAC	CAT	H	H	Yes	Transcription-repair coupling factor	2341	5844	1
5052	GGC	GGT	G	G	Yes	Transcription-repair coupling factor	2341	5844	1
5094	AGC	AGT	S	S	Yes	Transcription-repair coupling factor	2341	5844	1
5157	GAG	GAA	E	E	Yes	Transcription-repair coupling factor	2341	5844	1
5172	GCG	GCA	A	A	Yes	Transcription-repair coupling factor	2341	5844	1
5235	CGG	CGT	R	R	Yes	Transcription-repair coupling factor	2341	5844	1
5259	AAG	AAA	K	K	Yes	Transcription-repair coupling factor	2341	5844	1
5262	TCC	TCG	S	S	Yes	Transcription-repair coupling factor	2341	5844	1
5304	TCG	TCA	S	S	Yes	Transcription-repair coupling factor	2341	5844	1
5311	CTA	TTA	L	L	Yes	Transcription-repair coupling factor	2341	5844	1
5340	GGC	GGT	G	G	Yes	Transcription-repair coupling factor	2341	5844	1
5357	AGC	ATC	S	I	No	Transcription-repair coupling factor	2341	5844	1
5391	GAC	GAT	D	D	Yes	Transcription-repair coupling factor	2341	5844	1
5394	GCC	GCT	A	A	Yes	Transcription-repair coupling factor	2341	5844	1
5406	GAC	GAT	D	D	Yes	Transcription-repair coupling factor	2341	5844	1
5499	GAA	GAG	E	E	Yes	Transcription-repair coupling factor	2341	5844	1
5508	GAT	GAC	D	D	Yes	Transcription-repair coupling factor	2341	5844	1
5535	GTG	GTA	V	V	Yes	Transcription-repair coupling factor	2341	5844	1
5538	GCC	GCA	A	A	Yes	Transcription-repair coupling factor	2341	5844	1
5541	TAT	TAC	Y	Y	Yes	Transcription-repair coupling factor	2341	5844	1
5562	GTC	GTT	V	V	Yes	Transcription-repair coupling factor	2341	5844	1
5685	TCC	TCT	S	S	Yes	Transcription-repair coupling factor	2341	5844	1
5704	TCC	GCT	S	A	No	Transcription-repair coupling factor	2341	5844	1
5706	C	T	Merged with SNP 5704
5721	AAA	AAG	K	K	Yes	Transcription-repair coupling factor	2341	5844	1
5737	ATA	GTA	I	V	No	Transcription-repair coupling factor	2341	5844	1
5916	AAA	AAG	K	K	Yes	S4-domain-containing heat shock protein; S4-domain-containing heat shock protein	5902	6168	1
5994	AAC	AAT	N	N	Yes	S4-domain-containing heat shock protein; S4-domain-containing heat shock protein	5902	6168	1
6087	GAT	GAA	D	E	No	S4-domain-containing heat shock protein; S4-domain-containing heat shock protein	5902	6168	1
6114	GAT	GAC	D	D	Yes	S4-domain-containing heat shock protein; S4-domain-containing heat shock protein	5902	6168	1
6123	GGT	GGC	G	G	Yes	S4-domain-containing heat shock protein; S4-domain-containing heat shock protein	5902	6168	1
6319	GCC	GCT	A	A	Yes	Cell division protein DivIC	6161	6529	1
6340	CTG	CTA	L	L	Yes	Cell division protein DivIC	6161	6529	1
6346	CGA	CGC	R	R	Yes	Cell division protein DivIC	6161	6529	1
6358	TTA	TTG	L	L	Yes	Cell division protein DivIC	6161	6529	1
6394	GAT	GAC	D	D	Yes	Cell division protein DivIC	6161	6529	1
6412	TCC	TCT	S	S	Yes	Cell division protein DivIC	6161	6529	1
6415	GCC	GCT	A	A	Yes	Cell division protein DivIC	6161	6529	1
6454	AAG	AAA	K	K	Yes	Cell division protein DivIC	6161	6529	1
6567	CTA	TTA	L	L	Yes	FIG01114659: hypothetical protein	6534	6656	1
6603	ACT	GCT	T	A	No	FIG01114659: hypothetical protein	6534	6656	1
6696	ACC	ACT	T	T	Yes	FIG01114299: hypothetical protein	6649	7917	1
6759	ACC	ACA	T	T	Yes	FIG01114299: hypothetical protein	6649	7917	1
6813	TAT	TAC	Y	Y	Yes	FIG01114299: hypothetical protein	6649	7917	1
6831	TAT	TAC	Y	Y	Yes	FIG01114299: hypothetical protein	6649	7917	1
6878	ACC	AAC	T	N	No	FIG01114299: hypothetical protein	6649	7917	1
6880	ACC	GCC	T	A	No	FIG01114299: hypothetical protein	6649	7917	1
6891	ATA	ATC	I	I	Yes	FIG01114299: hypothetical protein	6649	7917	1
6969	CGG	CGC	R	R	Yes	FIG01114299: hypothetical protein	6649	7917	1
6972	TTG	TTA	L	L	Yes	FIG01114299: hypothetical protein	6649	7917	1
7025	CAG	CCG	Q	P	No	FIG01114299: hypothetical protein	6649	7917	1
7026	CAG	CAA	Q	Q	Yes	FIG01114299: hypothetical protein	6649	7917	1
7075	ACC	TCC	T	S	No	FIG01114299: hypothetical protein	6649	7917	1
7147	AAT	GAT	N	D	No	FIG01114299: hypothetical protein	6649	7917	1
7277	GCT	GGT	A	G	No	FIG01114299: hypothetical protein	6649	7917	1
7320	GCT	GCC	A	A	Yes	FIG01114299: hypothetical protein	6649	7917	1
7336	GCC	TCC	A	S	No	FIG01114299: hypothetical protein	6649	7917	1
7341	TAC	TAT	Y	Y	Yes	FIG01114299: hypothetical protein	6649	7917	1
7350	TAC	TAT	Y	Y	Yes	FIG01114299: hypothetical protein	6649	7917	1
7374	GGG	GGA	G	G	Yes	FIG01114299: hypothetical protein	6649	7917	1
7377	GAA	GAG	E	E	Yes	FIG01114299: hypothetical protein	6649	7917	1
7384	CTA	TTA	L	L	Yes	FIG01114299: hypothetical protein	6649	7917	1
7405	ATC	GTC	I	V	No	FIG01114299: hypothetical protein	6649	7917	1
7410	CCA	CCG	P	P	Yes	FIG01114299: hypothetical protein	6649	7917	1
7461	TTA	TTG	L	L	Yes	FIG01114299: hypothetical protein	6649	7917	1
7508	ACC	ATC	T	I	No	FIG01114299: hypothetical protein	6649	7917	1
7614	GGC	GGT	G	G	Yes	FIG01114299: hypothetical protein	6649	7917	1
7617	GAA	GAG	E	E	Yes	FIG01114299: hypothetical protein	6649	7917	1
7639	CTG	TTG	L	L	Yes	FIG01114299: hypothetical protein	6649	7917	1
7665	AAA	AAG	K	K	Yes	FIG01114299: hypothetical protein	6649	7917	1
7702	CTA	TTA	L	L	Yes	FIG01114299: hypothetical protein	6649	7917	1
7899	GTC	GTT	V	V	Yes	FIG01114299: hypothetical protein	6649	7917	1
7948	CGA	CAA	R	Q	No	tRNA(Ile)-lysidine synthetase	7914	9191	1
8024	CAG	CAT	Q	H	No	tRNA(Ile)-lysidine synthetase	7914	9191	1
8042	CAA	CAG	Q	Q	Yes	tRNA(Ile)-lysidine synthetase	7914	9191	1
8045	AAT	AAA	N	K	No	tRNA(Ile)-lysidine synthetase	7914	9191	1
8051	TTA	TTG	L	L	Yes	tRNA(Ile)-lysidine synthetase	7914	9191	1
8105	GAC	GAT	D	D	Yes	tRNA(Ile)-lysidine synthetase	7914	9191	1
8166	AGC	TGC	S	C	No	tRNA(Ile)-lysidine synthetase	7914	9191	1
8171	TTC	TTT	F	F	Yes	tRNA(Ile)-lysidine synthetase	7914	9191	1
8173	TTA	TCA	L	S	No	tRNA(Ile)-lysidine synthetase	7914	9191	1
8234	ATG	ATA	M	I	No	tRNA(Ile)-lysidine synthetase	7914	9191	1
8241	ATT	GTT	I	V	No	tRNA(Ile)-lysidine synthetase	7914	9191	1
8249	GCG	GCA	A	A	Yes	tRNA(Ile)-lysidine synthetase	7914	9191	1
8327	CTC	CTA	L	L	Yes	tRNA(Ile)-lysidine synthetase	7914	9191	1
8331	TAT	CAT	Y	H	No	tRNA(Ile)-lysidine synthetase	7914	9191	1
8354	AGA	AGT	R	S	No	tRNA(Ile)-lysidine synthetase	7914	9191	1
8379	ATT	CTC	I	L	No	tRNA(Ile)-lysidine synthetase	7914	9191	1
8381	T	C	Merged with SNP 8379
8395	CAT	CCT	H	P	No	tRNA(Ile)-lysidine synthetase	7914	9191	1
8411	GAT	GAC	D	D	Yes	tRNA(Ile)-lysidine synthetase	7914	9191	1
8480	CGA	CGG	R	R	Yes	tRNA(Ile)-lysidine synthetase	7914	9191	1
8490	TTA	ATA	L	I	No	tRNA(Ile)-lysidine synthetase	7914	9191	1
8518	CGT	CTT	R	L	No	tRNA(Ile)-lysidine synthetase	7914	9191	1
8582	GAG	GAA	E	E	Yes	tRNA(Ile)-lysidine synthetase	7914	9191	1
8619	CTA	TTA	L	L	Yes	tRNA(Ile)-lysidine synthetase	7914	9191	1
8633	TCT	TCA	S	S	Yes	tRNA(Ile)-lysidine synthetase	7914	9191	1
8634	CAA	AAA	Q	K	No	tRNA(Ile)-lysidine synthetase	7914	9191	1
8696	ACG	ACA	T	T	Yes	tRNA(Ile)-lysidine synthetase	7914	9191	1
8710	GAT	GCT	D	A	No	tRNA(Ile)-lysidine synthetase	7914	9191	1
8730	ACA	GCA	T	A	No	tRNA(Ile)-lysidine synthetase	7914	9191	1
8741	AGC	AGT	S	S	Yes	tRNA(Ile)-lysidine synthetase	7914	9191	1
8800	CGA	CAA	R	Q	No	tRNA(Ile)-lysidine synthetase	7914	9191	1
8802	GTT	ATT	V	I	No	tRNA(Ile)-lysidine synthetase	7914	9191	1
8878	AAG	ATG	K	M	No	tRNA(Ile)-lysidine synthetase	7914	9191	1
9064	ACA	ATA	T	I	No	tRNA(Ile)-lysidine synthetase	7914	9191	1
9375	ATC	ATT	I	I	Yes	Hypoxanthine-guanine phosphoribosyltransferase (EC 2.4.2.8)	9196	9738	1
9435	ATC	ATT	I	I	Yes	Hypoxanthine-guanine phosphoribosyltransferase (EC 2.4.2.8)	9196	9738	1
9460	GAT	AAT	D	N	No	Hypoxanthine-guanine phosphoribosyltransferase (EC 2.4.2.8)	9196	9738	1
9501	ATT	ATC	I	I	Yes	Hypoxanthine-guanine phosphoribosyltransferase (EC 2.4.2.8)	9196	9738	1
9507	ACG	ACA	T	T	Yes	Hypoxanthine-guanine phosphoribosyltransferase (EC 2.4.2.8)	9196	9738	1
9516	ACT	ACC	T	T	Yes	Hypoxanthine-guanine phosphoribosyltransferase (EC 2.4.2.8)	9196	9738	1
9524	AGT	AAT	S	N	No	Hypoxanthine-guanine phosphoribosyltransferase (EC 2.4.2.8)	9196	9738	1
9554	GTA	GCA	V	A	No	Hypoxanthine-guanine phosphoribosyltransferase (EC 2.4.2.8)	9196	9738	1
9556	GCT	ACT	A	T	No	Hypoxanthine-guanine phosphoribosyltransferase (EC 2.4.2.8)	9196	9738	1
9600	CGT	CGC	R	R	Yes	Hypoxanthine-guanine phosphoribosyltransferase (EC 2.4.2.8)	9196	9738	1
9624	TAC	TAT	Y	Y	Yes	Hypoxanthine-guanine phosphoribosyltransferase (EC 2.4.2.8)	9196	9738	1
9667	TTG	CTA	L	L	Yes	Hypoxanthine-guanine phosphoribosyltransferase (EC 2.4.2.8)	9196	9738	1
9669	G	A	Merged with SNP 9667
9672	GAC	GAT	D	D	Yes	Hypoxanthine-guanine phosphoribosyltransferase (EC 2.4.2.8)	9196	9738	1
9705	GTC	GTT	V	V	Yes	Hypoxanthine-guanine phosphoribosyltransferase (EC 2.4.2.8)	9196	9738	1
9786	AAT	AAC	N	N	Yes	Cell division protein FtsH (EC 3.4.24.-)	9754	11712	1
9795	CTA	CTC	L	L	Yes	Cell division protein FtsH (EC 3.4.24.-)	9754	11712	1
9867	AGC	AGT	S	S	Yes	Cell division protein FtsH (EC 3.4.24.-)	9754	11712	1
9933	TAT	TAC	Y	Y	Yes	Cell division protein FtsH (EC 3.4.24.-)	9754	11712	1
10002	ACG	ACT	T	T	Yes	Cell division protein FtsH (EC 3.4.24.-)	9754	11712	1
10026	ACA	ACT	T	T	Yes	Cell division protein FtsH (EC 3.4.24.-)	9754	11712	1
10055	ACT	AGT	T	S	No	Cell division protein FtsH (EC 3.4.24.-)	9754	11712	1
10056	ACT	ACC	T	T	Yes	Cell division protein FtsH (EC 3.4.24.-)	9754	11712	1
10077	ACA	ACC	T	T	Yes	Cell division protein FtsH (EC 3.4.24.-)	9754	11712	1
10204	TTA	CTA	L	L	Yes	Cell division protein FtsH (EC 3.4.24.-)	9754	11712	1
10275	GCC	GCT	A	A	Yes	Cell division protein FtsH (EC 3.4.24.-)	9754	11712	1
10368	TTC	TTT	F	F	Yes	Cell division protein FtsH (EC 3.4.24.-)	9754	11712	1
10392	ACC	ACA	T	T	Yes	Cell division protein FtsH (EC 3.4.24.-)	9754	11712	1
10416	GCG	GCA	A	A	Yes	Cell division protein FtsH (EC 3.4.24.-)	9754	11712	1
10470	GCG	GCA	A	A	Yes	Cell division protein FtsH (EC 3.4.24.-)	9754	11712	1
10728	GGA	GGG	G	G	Yes	Cell division protein FtsH (EC 3.4.24.-)	9754	11712	1
10731	ATT	ATC	I	I	Yes	Cell division protein FtsH (EC 3.4.24.-)	9754	11712	1
10860	CAC	CAT	H	H	Yes	Cell division protein FtsH (EC 3.4.24.-)	9754	11712	1
10890	GTG	GTT	V	V	Yes	Cell division protein FtsH (EC 3.4.24.-)	9754	11712	1
10989	AAG	AAA	K	K	Yes	Cell division protein FtsH (EC 3.4.24.-)	9754	11712	1
11025	GAA	GAG	E	E	Yes	Cell division protein FtsH (EC 3.4.24.-)	9754	11712	1
11055	AAG	AAA	K	K	Yes	Cell division protein FtsH (EC 3.4.24.-)	9754	11712	1
11115	ACT	ACC	T	T	Yes	Cell division protein FtsH (EC 3.4.24.-)	9754	11712	1
11208	CCG	CCT	P	P	Yes	Cell division protein FtsH (EC 3.4.24.-)	9754	11712	1
11304	GTC	GTT	V	V	Yes	Cell division protein FtsH (EC 3.4.24.-)	9754	11712	1
11310	ACG	ACT	T	T	Yes	Cell division protein FtsH (EC 3.4.24.-)	9754	11712	1
11523	GCA	GCT	A	A	Yes	Cell division protein FtsH (EC 3.4.24.-)	9754	11712	1
11625	GAA	GAG	E	E	Yes	Cell division protein FtsH (EC 3.4.24.-)	9754	11712	1
11668	CTA	TTA	L	L	Yes	Cell division protein FtsH (EC 3.4.24.-)	9754	11712	1
11677	AAT	GAT	N	D	No	Cell division protein FtsH (EC 3.4.24.-)	9754	11712	1
11978	A	G				Intergenic region
12028	CAG	CAA	Q	Q	Yes	Response regulator of the competence regulon ComE	12020	12562	1
12055	GCT	GCC	A	A	Yes	Response regulator of the competence regulon ComE	12020	12562	1
12058	ATT	ATG	I	M	No	Response regulator of the competence regulon ComE	12020	12562	1
12124	CTA	CTT	L	L	Yes	Response regulator of the competence regulon ComE	12020	12562	1
12161	AAA	TAA	K	*	No	Response regulator of the competence regulon ComE	12020	12562	1
12178	CAG	CAA	Q	Q	Yes	Response regulator of the competence regulon ComE	12020	12562	1
12193	ACT	ACC	T	T	Yes	Response regulator of the competence regulon ComE	12020	12562	1
12196	AAG	AAT	K	N	No	Response regulator of the competence regulon ComE	12020	12562	1
12214	AAC	AAC	N	N	Yes	Response regulator of the competence regulon ComE	12020	12562	1
12307	GTT	GTC	V	V	Yes	Response regulator of the competence regulon ComE	12020	12562	1
12326	ATT	TTT	I	F	No	Response regulator of the competence regulon ComE	12020	12562	1
12344	AAA	GAA	K	E	No	Response regulator of the competence regulon ComE	12020	12562	1
12590	G	A				Intergenic region
12596	T	C				Intergenic region
12608	A	C				Intergenic region
12611	A	G				Intergenic region
12632	A	G				Intergenic region
12860	T	C				Intergenic region
12911	G	A				Intergenic region
12941	G	A				Intergenic region
12968	A	G				Intergenic region
12974	A	G				Intergenic region
12977	A	T				Intergenic region
12989	G	A				Intergenic region
13010	C	A				Intergenic region
13037	A	G				Intergenic region
15033	T	C				Intergenic region
15133	T	A				Intergenic region
15592	A	C				Intergenic region
16212	G	T				Intergenic region
16460	A	G				Intergenic region
17919	G	A				Intergenic region
17922	T	C				Intergenic region
17934	T	C				Intergenic region
17938	G	A				Intergenic region
17966	T	C				Intergenic region
18023	C	T				Intergenic region
18126	A	C				Intergenic region
18131	A	G				Intergenic region
18184	C	T				Intergenic region
18348	C	A				Intergenic region
19552	CGC	TGC	R	C	No	Adenylosuccinate synthetase (EC 6.3.4.4)	18553	19887	1
19593	ATA	ATC	I	I	Yes	Adenylosuccinate synthetase (EC 6.3.4.4)	18553	19887	1
19758	TTG	TTA	L	L	Yes	Adenylosuccinate synthetase (EC 6.3.4.4)	18553	19887	1
19845	CCT	CCC	P	P	Yes	Adenylosuccinate synthetase (EC 6.3.4.4)	18553	19887	1
20591	A	G				Intergenic region
22752	GCT	GCC	A	A	Yes	DNA repair protein RadA	21796	23019	1
22869	CGT	CGC	R	R	Yes	DNA repair protein RadA	21796	23019	1
22884	ATC	ATT	I	I	Yes	DNA repair protein RadA	21796	23019	1
23069	G	A				Intergenic region
23310	GTA	GTG	V	V	Yes	Carbonic anhydrase (EC 4.2.1.1)	23092	23586	1
23319	CAG	CAA	Q	Q	Yes	Carbonic anhydrase (EC 4.2.1.1)	23092	23586	1
23325	CAA	CAG	Q	Q	Yes	Carbonic anhydrase (EC 4.2.1.1)	23092	23586	1
23331	GGG	GGA	G	G	Yes	Carbonic anhydrase (EC 4.2.1.1)	23092	23586	1
23383	CAA	AAA	Q	K	No	Carbonic anhydrase (EC 4.2.1.1)	23092	23586	1
23475	AGT	AGC	S	S	Yes	Carbonic anhydrase (EC 4.2.1.1)	23092	23586	1
23657	G	A				Intergenic region
51952	CCG	CCA	P	P	Yes	Beta-hexosaminidase (EC 3.2.1.52)	50374	54405	-1
52723	AGT	AGC	S	S	Yes	Beta-hexosaminidase (EC 3.2.1.52)	50374	54405	-1
52738	CTC	CTT	L	L	Yes	Beta-hexosaminidase (EC 3.2.1.52)	50374	54405	-1
52768	GTC	GTA	V	V	Yes	Beta-hexosaminidase (EC 3.2.1.52)	50374	54405	-1
52774	GCG	GCA	A	A	Yes	Beta-hexosaminidase (EC 3.2.1.52)	50374	54405	-1
52813	GTC	GTA	V	V	Yes	Beta-hexosaminidase (EC 3.2.1.52)	50374	54405	-1
52846	GAC	GAT	D	D	Yes	Beta-hexosaminidase (EC 3.2.1.52)	50374	54405	-1
52849	GCC	GCT	A	A	Yes	Beta-hexosaminidase (EC 3.2.1.52)	50374	54405	-1
52852	GCT	GCA	A	A	Yes	Beta-hexosaminidase (EC 3.2.1.52)	50374	54405	-1
52855	TTT	TTC	F	F	Yes	Beta-hexosaminidase (EC 3.2.1.52)	50374	54405	-1
52957	GGG	GGA	G	G	Yes	Beta-hexosaminidase (EC 3.2.1.52)	50374	54405	-1
52978	GGA	GGG	G	G	Yes	Beta-hexosaminidase (EC 3.2.1.52)	50374	54405	-1
53050	GGA	GGC	G	G	Yes	Beta-hexosaminidase (EC 3.2.1.52)	50374	54405	-1
53191	GAT	GAC	D	D	Yes	Beta-hexosaminidase (EC 3.2.1.52)	50374	54405	-1
53212	AGC	AGT	S	S	Yes	Beta-hexosaminidase (EC 3.2.1.52)	50374	54405	-1
53227	TAT	TAC	Y	Y	Yes	Beta-hexosaminidase (EC 3.2.1.52)	50374	54405	-1
53239	GAT	GAC	D	D	Yes	Beta-hexosaminidase (EC 3.2.1.52)	50374	54405	-1
53248	GCC	GCT	A	A	Yes	Beta-hexosaminidase (EC 3.2.1.52)	50374	54405	-1
53293	AAC	AAT	N	N	Yes	Beta-hexosaminidase (EC 3.2.1.52)	50374	54405	-1
53386	AAC	AAT	N	N	Yes	Beta-hexosaminidase (EC 3.2.1.52)	50374	54405	-1
53422	AAT	AAC	N	N	Yes	Beta-hexosaminidase (EC 3.2.1.52)	50374	54405	-1
53718	GAT	AAT	D	N	No	Beta-hexosaminidase (EC 3.2.1.52)	50374	54405	-1
53719	ACT	ACC	T	T	Yes	Beta-hexosaminidase (EC 3.2.1.52)	50374	54405	-1
53749	GAC	GAT	D	D	Yes	Beta-hexosaminidase (EC 3.2.1.52)	50374	54405	-1
54518	A	G				Intergenic region
54526	T	A				Intergenic region
54545	T	A				Intergenic region
54591	C	A				Intergenic region
54639	C	T				Intergenic region
54646	C	A				Intergenic region
54675	T	C				Intergenic region
54687	A	G				Intergenic region
54876	ACT	ACA	T	T	Yes	Transcriptional regulator, GntR family	54708	55424	-1
55038	GTG	GTA	V	V	Yes	Transcriptional regulator, GntR family	54708	55424	-1
55041	GAT	GAC	D	D	Yes	Transcriptional regulator, GntR family	54708	55424	-1
55131	GAA	GAG	E	E	Yes	Transcriptional regulator, GntR family	54708	55424	-1
55155	GAC	GAT	D	D	Yes	Transcriptional regulator, GntR family	54708	55424	-1
55179	GTT	GTC	V	V	Yes	Transcriptional regulator, GntR family	54708	55424	-1
55209	CGT	CGC	R	R	Yes	Transcriptional regulator, GntR family	54708	55424	-1
55230	GGA	GGT	G	G	Yes	Transcriptional regulator, GntR family	54708	55424	-1
55245	CGT	CGC	R	R	Yes	Transcriptional regulator, GntR family	54708	55424	-1
55413	CCA	CCT	P	P	Yes	Transcriptional regulator, GntR family	54708	55424	-1
55450	T	A				Intergenic region
55452	C	T				Intergenic region
55453	C	T				Intergenic region
55598	G	T				Intergenic region
55605	T	A				Intergenic region
55651	G	T				Intergenic region
55695	T	G				Intergenic region
56025	CCA	CCG	P	P	Yes	Beta-galactosidase 3	55747	57534	1
56076	ACA	ACC	T	T	Yes	Beta-galactosidase 3	55747	57534	1
56178	AAT	AAC	N	N	Yes	Beta-galactosidase 3	55747	57534	1
56181	GGT	GGC	G	G	Yes	Beta-galactosidase 3	55747	57534	1
56193	CTT	CTC	L	L	Yes	Beta-galactosidase 3	55747	57534	1
56265	TTG	TTA	L	L	Yes	Beta-galactosidase 3	55747	57534	1
56346	ATC	ATT	I	I	Yes	Beta-galactosidase 3	55747	57534	1
56379	GGC	GGT	G	G	Yes	Beta-galactosidase 3	55747	57534	1
56505	ACA	ACT	T	T	Yes	Beta-galactosidase 3	55747	57534	1
56508	CGG	CGT	R	R	Yes	Beta-galactosidase 3	55747	57534	1
56586	GGA	GGT	G	G	Yes	Beta-galactosidase 3	55747	57534	1
56640	CCA	CCG	P	P	Yes	Beta-galactosidase 3	55747	57534	1
56652	TCA	TCT	S	S	Yes	Beta-galactosidase 3	55747	57534	1
56742	GAT	GAG	D	E	No	Beta-galactosidase 3	55747	57534	1
56826	ACT	ACC	T	T	Yes	Beta-galactosidase 3	55747	57534	1
56834	AGT	AAT	S	N	No	Beta-galactosidase 3	55747	57534	1
56915	AAT	ACT	N	T	No	Beta-galactosidase 3	55747	57534	1
56916	AAT	AAG	N	K	No	Beta-galactosidase 3	55747	57534	1
56940	GAA	GAG	E	E	Yes	Beta-galactosidase 3	55747	57534	1
56979	CAG	CAA	Q	Q	Yes	Beta-galactosidase 3	55747	57534	1
57027	ATA	ATT	I	I	Yes	Beta-galactosidase 3	55747	57534	1
57030	GGT	GGC	G	G	Yes	Beta-galactosidase 3	55747	57534	1
57036	GAT	GAC	D	D	Yes	Beta-galactosidase 3	55747	57534	1
57048	CAG	CAA	Q	Q	Yes	Beta-galactosidase 3	55747	57534	1
57054	AAT	AAC	N	N	Yes	Beta-galactosidase 3	55747	57534	1
57114	GGT	GGA	G	G	Yes	Beta-galactosidase 3	55747	57534	1
57123	TTC	TTT	F	F	Yes	Beta-galactosidase 3	55747	57534	1
57138	CAA	CAG	Q	Q	Yes	Beta-galactosidase 3	55747	57534	1
57153	CGT	CGA	R	R	Yes	Beta-galactosidase 3	55747	57534	1
57228	AAA	AAG	K	K	Yes	Beta-galactosidase 3	55747	57534	1
57261	CAG	CAA	Q	Q	Yes	Beta-galactosidase 3	55747	57534	1
57288	ACG	ACT	T	T	Yes	Beta-galactosidase 3	55747	57534	1
57291	GTC	GTT	V	V	Yes	Beta-galactosidase 3	55747	57534	1
57364	TTA	CTA	L	L	Yes	Beta-galactosidase 3	55747	57534	1
57369	GGA	GGG	G	G	Yes	Beta-galactosidase 3	55747	57534	1
57417	AGC	AGT	S	S	Yes	Beta-galactosidase 3	55747	57534	1
57486	CAT	CAC	H	H	Yes	Beta-galactosidase 3	55747	57534	1
57893	AAC	AAT	N	N	Yes	Predicted PTS system, galactosamine-specific IIB component (EC 2.7.1.69)	57531	58007	1
58043	TGG	CCG	W	P	No	Predicted PTS system, galactosamine-specific IIC component (EC 2.7.1.69)	58034	58939	1
58044	G	C	Merged with SNP 58043
58153	TTG	TTA	L	L	Yes	Predicted PTS system, galactosamine-specific IIC component (EC 2.7.1.69)	58034	58939	1
58228	TTT	TTC	F	F	Yes	Predicted PTS system, galactosamine-specific IIC component (EC 2.7.1.69)	58034	58939	1
58309	GAT	GAC	D	D	Yes	Predicted PTS system, galactosamine-specific IIC component (EC 2.7.1.69)	58034	58939	1
58342	GCA	GCG	A	A	Yes	Predicted PTS system, galactosamine-specific IIC component (EC 2.7.1.69)	58034	58939	1
58466	ATT	CTT	I	L	No	Predicted PTS system, galactosamine-specific IIC component (EC 2.7.1.69)	58034	58939	1
58507	GCC	GCT	A	A	Yes	Predicted PTS system, galactosamine-specific IIC component (EC 2.7.1.69)	58034	58939	1
58516	TTC	TTT	F	F	Yes	Predicted PTS system, galactosamine-specific IIC component (EC 2.7.1.69)	58034	58939	1
58585	ACT	ACA	T	T	Yes	Predicted PTS system, galactosamine-specific IIC component (EC 2.7.1.69)	58034	58939	1
58618	TTC	TTT	F	F	Yes	Predicted PTS system, galactosamine-specific IIC component (EC 2.7.1.69)	58034	58939	1
58621	GCT	GCA	A	A	Yes	Predicted PTS system, galactosamine-specific IIC component (EC 2.7.1.69)	58034	58939	1
58834	GTG	GTA	V	V	Yes	Predicted PTS system, galactosamine-specific IIC component (EC 2.7.1.69)	58034	58939	1
58849	GCA	GCG	A	A	Yes	Predicted PTS system, galactosamine-specific IIC component (EC 2.7.1.69)	58034	58939	1
58921	ATC	ATT	I	I	Yes	Predicted PTS system, galactosamine-specific IIC component (EC 2.7.1.69)	58034	58939	1
58947	CTA	TTA	L	L	Yes	Predicted PTS system, galactosamine-specific IID component (EC 2.7.1.69)	58926	59747	1
58973	ATC	ATT	I	I	Yes	Predicted PTS system, galactosamine-specific IID component (EC 2.7.1.69)	58926	59747	1
58991	TTT	TTC	F	F	Yes	Predicted PTS system, galactosamine-specific IID component (EC 2.7.1.69)	58926	59747	1
59003	TTA	TTG	L	L	Yes	Predicted PTS system, galactosamine-specific IID component (EC 2.7.1.69)	58926	59747	1
59006	GGT	GGA	G	G	Yes	Predicted PTS system, galactosamine-specific IID component (EC 2.7.1.69)	58926	59747	1
59030	GCT	GCA	A	A	Yes	Predicted PTS system, galactosamine-specific IID component (EC 2.7.1.69)	58926	59747	1
59033	TCT	TCA	S	S	Yes	Predicted PTS system, galactosamine-specific IID component (EC 2.7.1.69)	58926	59747	1
59078	GGG	GGA	G	G	Yes	Predicted PTS system, galactosamine-specific IID component (EC 2.7.1.69)	58926	59747	1
59093	GAA	GAG	E	E	Yes	Predicted PTS system, galactosamine-specific IID component (EC 2.7.1.69)	58926	59747	1
59132	AAT	AAC	N	N	Yes	Predicted PTS system, galactosamine-specific IID component (EC 2.7.1.69)	58926	59747	1
59153	ACT	ACA	T	T	Yes	Predicted PTS system, galactosamine-specific IID component (EC 2.7.1.69)	58926	59747	1
59177	GCC	GCT	A	A	Yes	Predicted PTS system, galactosamine-specific IID component (EC 2.7.1.69)	58926	59747	1
59195	GGT	GGC	G	G	Yes	Predicted PTS system, galactosamine-specific IID component (EC 2.7.1.69)	58926	59747	1
59198	GTG	GTT	V	V	Yes	Predicted PTS system, galactosamine-specific IID component (EC 2.7.1.69)	58926	59747	1
59213	GCC	GCG	A	A	Yes	Predicted PTS system, galactosamine-specific IID component (EC 2.7.1.69)	58926	59747	1
59309	GCA	GCT	A	A	Yes	Predicted PTS system, galactosamine-specific IID component (EC 2.7.1.69)	58926	59747	1
59315	ACT	ACA	T	T	Yes	Predicted PTS system, galactosamine-specific IID component (EC 2.7.1.69)	58926	59747	1
59396	CAA	CAG	Q	Q	Yes	Predicted PTS system, galactosamine-specific IID component (EC 2.7.1.69)	58926	59747	1
59408	GCC	GCA	A	A	Yes	Predicted PTS system, galactosamine-specific IID component (EC 2.7.1.69)	58926	59747	1
59468	GAT	GAA	D	E	No	Predicted PTS system, galactosamine-specific IID component (EC 2.7.1.69)	58926	59747	1
59489	GTC	GTA	V	V	Yes	Predicted PTS system, galactosamine-specific IID component (EC 2.7.1.69)	58926	59747	1
59531	GAG	GAA	E	E	Yes	Predicted PTS system, galactosamine-specific IID component (EC 2.7.1.69)	58926	59747	1
59603	CGC	CGT	R	R	Yes	Predicted PTS system, galactosamine-specific IID component (EC 2.7.1.69)	58926	59747	1
59627	GCC	GCA	A	A	Yes	Predicted PTS system, galactosamine-specific IID component (EC 2.7.1.69)	58926	59747	1
60502	GAA	GAG	E	E	Yes	Galactosamine-6-phosphate isomerase (EC 5.3.1.-)	60413	61579	1
60523	GCG	GCA	A	A	Yes	Galactosamine-6-phosphate isomerase (EC 5.3.1.-)	60413	61579	1
60529	CGG	CGT	R	R	Yes	Galactosamine-6-phosphate isomerase (EC 5.3.1.-)	60413	61579	1
60559	ATT	ATC	I	I	Yes	Galactosamine-6-phosphate isomerase (EC 5.3.1.-)	60413	61579	1
60562	GCG	GCT	A	A	Yes	Galactosamine-6-phosphate isomerase (EC 5.3.1.-)	60413	61579	1
60568	AAA	AAG	K	K	Yes	Galactosamine-6-phosphate isomerase (EC 5.3.1.-)	60413	61579	1
60595	ACA	ACG	T	T	Yes	Galactosamine-6-phosphate isomerase (EC 5.3.1.-)	60413	61579	1
60604	GGG	GGT	G	G	Yes	Galactosamine-6-phosphate isomerase (EC 5.3.1.-)	60413	61579	1
60634	GTG	GTA	V	V	Yes	Galactosamine-6-phosphate isomerase (EC 5.3.1.-)	60413	61579	1
60635	TCT	CCA	S	P	No	Galactosamine-6-phosphate isomerase (EC 5.3.1.-)	60413	61579	1
60637	T	A	Merged with SNP 60635
60658	GAC	GAT	D	D	Yes	Galactosamine-6-phosphate isomerase (EC 5.3.1.-)	60413	61579	1
60769	GGA	GGG	G	G	Yes	Galactosamine-6-phosphate isomerase (EC 5.3.1.-)	60413	61579	1
60790	GCA	GCG	A	A	Yes	Galactosamine-6-phosphate isomerase (EC 5.3.1.-)	60413	61579	1
60958	ACA	ACG	T	T	Yes	Galactosamine-6-phosphate isomerase (EC 5.3.1.-)	60413	61579	1
60961	TCT	TCC	S	S	Yes	Galactosamine-6-phosphate isomerase (EC 5.3.1.-)	60413	61579	1
60965	CTG	ATG	L	M	No	Galactosamine-6-phosphate isomerase (EC 5.3.1.-)	60413	61579	1
60985	GTC	GTT	V	V	Yes	Galactosamine-6-phosphate isomerase (EC 5.3.1.-)	60413	61579	1
61177	ACA	ACT	T	T	Yes	Galactosamine-6-phosphate isomerase (EC 5.3.1.-)	60413	61579	1
61246	AAC	AAT	N	N	Yes	Galactosamine-6-phosphate isomerase (EC 5.3.1.-)	60413	61579	1
61333	GAC	GAT	D	D	Yes	Galactosamine-6-phosphate isomerase (EC 5.3.1.-)	60413	61579	1
61351	GTC	GTT	V	V	Yes	Galactosamine-6-phosphate isomerase (EC 5.3.1.-)	60413	61579	1
61399	GTA	GTG	V	V	Yes	Galactosamine-6-phosphate isomerase (EC 5.3.1.-)	60413	61579	1
61441	GTT	GTC	V	V	Yes	Galactosamine-6-phosphate isomerase (EC 5.3.1.-)	60413	61579	1
61462	GCT	GCC	A	A	Yes	Galactosamine-6-phosphate isomerase (EC 5.3.1.-)	60413	61579	1
61555	GTG	GTT	V	V	Yes	Galactosamine-6-phosphate isomerase (EC 5.3.1.-)	60413	61579	1
61576	AAG	AAA	K	K	Yes	Galactosamine-6-phosphate isomerase (EC 5.3.1.-)	60413	61579	1
61586	G	A				Intergenic region
61652	AAC	AAT	N	N	Yes	Tagatose 1,6-bisphosphate aldolase (EC 4.1.2.40)	61590	62585	1
61655	GGC	GGA	G	G	Yes	Tagatose 1,6-bisphosphate aldolase (EC 4.1.2.40)	61590	62585	1
61658	ATT	ATC	I	I	Yes	Tagatose 1,6-bisphosphate aldolase (EC 4.1.2.40)	61590	62585	1
62748	GAA	GAG	E	E	Yes	Aldose 1-epimerase (EC 5.1.3.3)	62731	63768	1
63013	AAT	GAC	N	D	No	Aldose 1-epimerase (EC 5.1.3.3)	62731	63768	1
63015	T	C	Merged with SNP 63013
63030	AAC	AAT	N	N	Yes	Aldose 1-epimerase (EC 5.1.3.3)	62731	63768	1
63072	TCG	TCC	S	S	Yes	Aldose 1-epimerase (EC 5.1.3.3)	62731	63768	1
63273	AAC	AAT	N	N	Yes	Aldose 1-epimerase (EC 5.1.3.3)	62731	63768	1
63498	GCC	GCA	A	A	Yes	Aldose 1-epimerase (EC 5.1.3.3)	62731	63768	1
63532	AAC	CAC	N	H	No	Aldose 1-epimerase (EC 5.1.3.3)	62731	63768	1
63552	CTG	CTT	L	L	Yes	Aldose 1-epimerase (EC 5.1.3.3)	62731	63768	1
63567	GCC	GCT	A	A	Yes	Aldose 1-epimerase (EC 5.1.3.3)	62731	63768	1
63586	ACA	TCA	T	S	No	Aldose 1-epimerase (EC 5.1.3.3)	62731	63768	1
63920	GCG	GCT	A	A	Yes	Glyoxalase family protein	63879	64733	1
63938	GAT	GAC	D	D	Yes	Glyoxalase family protein	63879	64733	1
63968	CAA	CAG	Q	Q	Yes	Glyoxalase family protein	63879	64733	1
64022	CTT	CTC	L	L	Yes	Glyoxalase family protein	63879	64733	1
64062	TCT	GCT	S	A	No	Glyoxalase family protein	63879	64733	1
64098	CTG	TTG	L	L	Yes	Glyoxalase family protein	63879	64733	1
64107	CTG	TTG	L	L	Yes	Glyoxalase family protein	63879	64733	1
64157	GAT	GAC	D	D	Yes	Glyoxalase family protein	63879	64733	1
64178	GGG	GGA	G	G	Yes	Glyoxalase family protein	63879	64733	1
64262	GTG	GTA	V	V	Yes	Glyoxalase family protein	63879	64733	1
64279	CTA	CGA	L	R	No	Glyoxalase family protein	63879	64733	1
64307	ACC	ACT	T	T	Yes	Glyoxalase family protein	63879	64733	1
64310	GAG	GAA	E	E	Yes	Glyoxalase family protein	63879	64733	1
64313	GCT	GCC	A	A	Yes	Glyoxalase family protein	63879	64733	1
64343	GGG	GGA	G	G	Yes	Glyoxalase family protein	63879	64733	1
64352	GTA	GTG	V	V	Yes	Glyoxalase family protein	63879	64733	1
64457	GAG	GAA	E	E	Yes	Glyoxalase family protein	63879	64733	1
64541	AAG	AAA	K	K	Yes	Glyoxalase family protein	63879	64733	1
64545	CTA	TTG	L	L	Yes	Glyoxalase family protein	63879	64733	1
64547	A	G	Merged with SNP 64545
64569	CCA	TCA	P	S	No	Glyoxalase family protein	63879	64733	1
65352	GTC	GTT	V	V	Yes	hypothetical protein	65047	65619	1
65370	AAT	AAC	N	N	Yes	hypothetical protein	65047	65619	1
65379	ACA	ACC	T	T	Yes	hypothetical protein	65047	65619	1
65394	TCA	TCT	S	S	Yes	hypothetical protein	65047	65619	1
65651	AAC	TGC	N	C	No	FIG01117398: hypothetical protein	65621	66289	1
65652	A	G	Merged with SNP 65651
65679	AGG	AAG	R	K	No	FIG01117398: hypothetical protein	65621	66289	1
65710	AGT	AGC	S	S	Yes	FIG01117398: hypothetical protein	65621	66289	1
65734	GCT	GCC	A	A	Yes	FIG01117398: hypothetical protein	65621	66289	1
65777	GCT	ATT	A	I	No	FIG01117398: hypothetical protein	65621	66289	1
65778	C	T	Merged with SNP 65777
65814	CTT	CGT	L	R	No	FIG01117398: hypothetical protein	65621	66289	1
65827	GCG	GCA	A	A	Yes	FIG01117398: hypothetical protein	65621	66289	1
65852	ATG	GCA	M	A	No	FIG01117398: hypothetical protein	65621	66289	1
65853	T	C	Merged with SNP 65852
65854	G	A	Merged with SNP 65852
65904	GAA	GGA	E	G	No	FIG01117398: hypothetical protein	65621	66289	1
65971	GAT	GAA	D	E	No	FIG01117398: hypothetical protein	65621	66289	1
66058	CTT	CTC	L	L	Yes	FIG01117398: hypothetical protein	65621	66289	1
66106	GGG	GGA	G	G	Yes	FIG01117398: hypothetical protein	65621	66289	1
66118	CCT	CCC	P	P	Yes	FIG01117398: hypothetical protein	65621	66289	1
66127	GAG	GAA	E	E	Yes	FIG01117398: hypothetical protein	65621	66289	1
66145	CCG	CCC	P	P	Yes	FIG01117398: hypothetical protein	65621	66289	1
66178	ATC	ATT	I	I	Yes	FIG01117398: hypothetical protein	65621	66289	1
66185	ATT	GTT	I	V	No	FIG01117398: hypothetical protein	65621	66289	1
66217	AAT	AAC	N	N	Yes	FIG01117398: hypothetical protein	65621	66289	1
66388	A	G				Intergenic region
66392	A	G				Intergenic region
66503	GCA	GCC	A	A	Yes	FIG01117398: hypothetical protein	66411	67082	1
66893	GGT	GGC	G	G	Yes	FIG01117398: hypothetical protein	66411	67082	1
67348	CCC	CCT	P	P	Yes	hypothetical protein	67085	67747	1
67352	GCT	ACT	A	T	No	hypothetical protein	67085	67747	1
67360	GCT	GCC	A	A	Yes	hypothetical protein	67085	67747	1
67449	GAC	GTC	D	V	No	hypothetical protein	67085	67747	1
67462	AAG	AAT	K	N	No	hypothetical protein	67085	67747	1
67472	GTT	CTT	V	L	No	hypothetical protein	67085	67747	1
67479	TCT	TTT	S	F	No	hypothetical protein	67085	67747	1
67483	AAA	AAC	K	N	No	hypothetical protein	67085	67747	1
67491	GAA	GGA	E	G	No	hypothetical protein	67085	67747	1
67502	CCT	TCT	P	S	No	hypothetical protein	67085	67747	1
67533	ATG	AAG	M	K	No	hypothetical protein	67085	67747	1
67536	ATC	ACC	I	T	No	hypothetical protein	67085	67747	1
67559	TCG	CCG	S	P	No	hypothetical protein	67085	67747	1
67627	AGT	AGC	S	S	Yes	hypothetical protein	67085	67747	1
67755	A	G				Intergenic region
67758	T	A				Intergenic region
67761	A	G				Intergenic region
67775	C	T				Intergenic region
67781	C	A				Intergenic region
67787	G	A				Intergenic region
67788	G	A				Intergenic region
67837	GTG	GTA	V	V	Yes	hypothetical protein	67823	68380	1
67903	CTT	CTC	L	L	Yes	hypothetical protein	67823	68380	1
67905	TTC	TAC	F	Y	No	hypothetical protein	67823	68380	1
67906	TTC	TTT	F	F	Yes	hypothetical protein	67823	68380	1
67918	CGG	CGA	R	R	Yes	hypothetical protein	67823	68380	1
67936	CGC	CGT	R	R	Yes	hypothetical protein	67823	68380	1
68030	TCT	GCT	S	A	No	hypothetical protein	67823	68380	1
68069	GTC	ATC	V	I	No	hypothetical protein	67823	68380	1
68128	CTG	CTA	L	L	Yes	hypothetical protein	67823	68380	1
68131	GCC	GCG	A	A	Yes	hypothetical protein	67823	68380	1
68209	GAG	GAA	E	E	Yes	hypothetical protein	67823	68380	1
68215	ACA	ACG	T	T	Yes	hypothetical protein	67823	68380	1
68347	GCC	GCA	A	A	Yes	hypothetical protein	67823	68380	1
68453	A	G				Intergenic region
68472	A	T				Intergenic region
68485	G	A				Intergenic region
68487	G	A				Intergenic region
68600	ATC	ATA	I	I	Yes	FIG01117137: hypothetical protein	68580	68837	1
68624	GGC	GGT	G	G	Yes	FIG01117137: hypothetical protein	68580	68837	1
68756	TGC	TGT	C	C	Yes	FIG01117137: hypothetical protein	68580	68837	1
68769	TTA	CTA	L	L	Yes	FIG01117137: hypothetical protein	68580	68837	1
68774	GAT	GAC	D	D	Yes	FIG01117137: hypothetical protein	68580	68837	1
68831	CGG	CGA	R	R	Yes	FIG01117137: hypothetical protein	68580	68837	1
68834	AAG	AAA	K	K	Yes	FIG01117137: hypothetical protein	68580	68837	1
68853	A	C				Intergenic region
68872	T	G				Intergenic region
68889	A	G				Intergenic region
68908	A	C				Intergenic region
68928	A	G				Intergenic region
68957	A	G				Intergenic region
69010	T	C				Intergenic region
69040	G	T				Intergenic region
69041	A	T				Intergenic region
69042	A	T				Intergenic region
69231	CCG	CCT	P	P	Yes	Rhodanese-like domain protein	69060	69356	-1
69234	CTT	CTG	L	L	Yes	Rhodanese-like domain protein	69060	69356	-1
69241	AGA	AAA	R	K	No	Rhodanese-like domain protein	69060	69356	-1
69243	GCA	GCT	A	A	Yes	Rhodanese-like domain protein	69060	69356	-1
69246	GGA	GGT	G	G	Yes	Rhodanese-like domain protein	69060	69356	-1
69279	GAG	GAA	E	E	Yes	Rhodanese-like domain protein	69060	69356	-1
69297	AAC	AAT	N	N	Yes	Rhodanese-like domain protein	69060	69356	-1
69389	CTA	CAA	L	Q	No	FIG01114933: hypothetical protein	69331	69516	-1
69420	GCC	ACC	A	T	No	FIG01114933: hypothetical protein	69331	69516	-1
69652	G	A				Intergenic region
69745	GTT	GTC	V	V	Yes	Rhodanese-like	69706	70011	-1
69775	CTT	CTA	L	L	Yes	Rhodanese-like	69706	70011	-1
69779	ATG	AAG	M	K	No	Rhodanese-like	69706	70011	-1
69802	GTA	GTG	V	V	Yes	Rhodanese-like	69706	70011	-1
69811	CAC	CAT	H	H	Yes	Rhodanese-like	69706	70011	-1
69820	GTC	GTT	V	V	Yes	Rhodanese-like	69706	70011	-1
69826	CTT	CTC	L	L	Yes	Rhodanese-like	69706	70011	-1
69883	GCC	GCA	A	A	Yes	Rhodanese-like	69706	70011	-1
69898	GGT	GGC	G	G	Yes	Rhodanese-like	69706	70011	-1
69931	CTA	CTG	L	L	Yes	Rhodanese-like	69706	70011	-1
70458	TGC	TGT	C	C	Yes	Maltose O-acetyltransferase (EC 2.3.1.79)	70186	70749	1
70614	GTC	GTT	V	V	Yes	Maltose O-acetyltransferase (EC 2.3.1.79)	70186	70749	1
70626	GTG	GTA	V	V	Yes	Maltose O-acetyltransferase (EC 2.3.1.79)	70186	70749	1
70641	AAC	AAT	N	N	Yes	Maltose O-acetyltransferase (EC 2.3.1.79)	70186	70749	1
70649	GCA	GTA	A	V	No	Maltose O-acetyltransferase (EC 2.3.1.79)	70186	70749	1
70656	GCG	GCA	A	A	Yes	Maltose O-acetyltransferase (EC 2.3.1.79)	70186	70749	1
70677	TCC	TCT	S	S	Yes	Maltose O-acetyltransferase (EC 2.3.1.79)	70186	70749	1
70680	TTC	TTT	F	F	Yes	Maltose O-acetyltransferase (EC 2.3.1.79)	70186	70749	1
70683	GGA	GGC	G	G	Yes	Maltose O-acetyltransferase (EC 2.3.1.79)	70186	70749	1
70686	GAT	GAC	D	D	Yes	Maltose O-acetyltransferase (EC 2.3.1.79)	70186	70749	1
70704	GGC	GGG	G	G	Yes	Maltose O-acetyltransferase (EC 2.3.1.79)	70186	70749	1
70719	GTC	GTT	V	V	Yes	Maltose O-acetyltransferase (EC 2.3.1.79)	70186	70749	1
70760	T	C				Intergenic region
70761	T	G				Intergenic region
70762	G	A				Intergenic region
70924	A	G				Intergenic region
72639	T	G				Intergenic region
72659	C	T				Intergenic region
72660	C	T				Intergenic region
72661	C	A				Intergenic region
72669	T	A				Intergenic region
72679	C	T				Intergenic region
72681	T	A				Intergenic region
72689	AAA	ACA	K	T	No	Methionine ABC transporter ATP-binding protein	72682	73398	1
72693	TTG	TTA	L	L	Yes	Methionine ABC transporter ATP-binding protein	72682	73398	1
72729	CAA	CAT	Q	H	No	Methionine ABC transporter ATP-binding protein	72682	73398	1
72767	CTA	CCA	L	P	No	Methionine ABC transporter ATP-binding protein	72682	73398	1
72895	TAT	CAT	Y	H	No	Methionine ABC transporter ATP-binding protein	72682	73398	1
72909	GAC	GAT	D	D	Yes	Methionine ABC transporter ATP-binding protein	72682	73398	1
72915	GGT	GGC	G	G	Yes	Methionine ABC transporter ATP-binding protein	72682	73398	1
72927	CAG	CAA	Q	Q	Yes	Methionine ABC transporter ATP-binding protein	72682	73398	1
73011	CTG	CTA	L	L	Yes	Methionine ABC transporter ATP-binding protein	72682	73398	1
73251	ACT	ACC	T	T	Yes	Methionine ABC transporter ATP-binding protein	72682	73398	1
73275	TTA	TTG	L	L	Yes	Methionine ABC transporter ATP-binding protein	72682	73398	1
73302	GGT	GGC	G	G	Yes	Methionine ABC transporter ATP-binding protein	72682	73398	1
73325	ATA	ACA	I	T	No	Methionine ABC transporter ATP-binding protein	72682	73398	1
73380	TTG	TTA	L	L	Yes	Methionine ABC transporter ATP-binding protein	72682	73398	1
73392	GGA	GGT	G	G	Yes	Methionine ABC transporter ATP-binding protein	72682	73398	1
73399	G	A				Intergenic region
73535	AAT	GAT	N	D	No	ABC transporter permease protein	73400	74482	1
73549	GCG	GCA	A	A	Yes	ABC transporter permease protein	73400	74482	1
73555	CAA	CAG	Q	Q	Yes	ABC transporter permease protein	73400	74482	1
73633	CAG	CAA	Q	Q	Yes	ABC transporter permease protein	73400	74482	1
73639	AAG	AAA	K	K	Yes	ABC transporter permease protein	73400	74482	1
73801	GTC	GTT	V	V	Yes	ABC transporter permease protein	73400	74482	1
74020	CGT	CGA	R	R	Yes	ABC transporter permease protein	73400	74482	1
74029	ATT	ATC	I	I	Yes	ABC transporter permease protein	73400	74482	1
74245	CTT	CTC	L	L	Yes	ABC transporter permease protein	73400	74482	1
74293	TCA	TCC	S	S	Yes	ABC transporter permease protein	73400	74482	1
74310	CTA	CCA	L	P	No	ABC transporter permease protein	73400	74482	1
74377	GGA	GGG	G	G	Yes	ABC transporter permease protein	73400	74482	1
74399	CCA	TCA	P	S	No	ABC transporter permease protein	73400	74482	1
74420	ATT	GTT	I	V	No	ABC transporter permease protein	73400	74482	1
74446	CTC	CTT	L	L	Yes	ABC transporter permease protein	73400	74482	1
74683	CAG	CAA	Q	Q	Yes	transcriptional regulator, TetR family	74522	75145	1
74720	CTA	TTA	L	L	Yes	transcriptional regulator, TetR family	74522	75145	1
74764	GGT	GGC	G	G	Yes	transcriptional regulator, TetR family	74522	75145	1
74827	CAC	CAT	H	H	Yes	transcriptional regulator, TetR family	74522	75145	1
74926	ATA	ATC	I	I	Yes	transcriptional regulator, TetR family	74522	75145	1
74931	AAT	AGT	N	S	No	transcriptional regulator, TetR family	74522	75145	1
74941	CAG	CAA	Q	Q	Yes	transcriptional regulator, TetR family	74522	75145	1
75407	C	T				Intergenic region
75521	GAG	GGG	E	G	No	Uridine phosphorylase (EC 2.4.2.3)	75445	76209	1
75771	GGT	GGA	G	G	Yes	Uridine phosphorylase (EC 2.4.2.3)	75445	76209	1
75774	ACT	ACC	T	T	Yes	Uridine phosphorylase (EC 2.4.2.3)	75445	76209	1
75780	GGA	GGC	G	G	Yes	Uridine phosphorylase (EC 2.4.2.3)	75445	76209	1
75843	GGA	GGG	G	G	Yes	Uridine phosphorylase (EC 2.4.2.3)	75445	76209	1
75855	CAC	CAT	H	H	Yes	Uridine phosphorylase (EC 2.4.2.3)	75445	76209	1
75898	ATC	GTC	I	V	No	Uridine phosphorylase (EC 2.4.2.3)	75445	76209	1
75942	TAC	TAT	Y	Y	Yes	Uridine phosphorylase (EC 2.4.2.3)	75445	76209	1
75948	GAG	GAA	E	E	Yes	Uridine phosphorylase (EC 2.4.2.3)	75445	76209	1
75951	GTC	GTT	V	V	Yes	Uridine phosphorylase (EC 2.4.2.3)	75445	76209	1
76023	TGT	TGC	C	C	Yes	Uridine phosphorylase (EC 2.4.2.3)	75445	76209	1
76035	GAG	GAA	E	E	Yes	Uridine phosphorylase (EC 2.4.2.3)	75445	76209	1
76047	TCT	TCG	S	S	Yes	Uridine phosphorylase (EC 2.4.2.3)	75445	76209	1
76062	GTA	GTG	V	V	Yes	Uridine phosphorylase (EC 2.4.2.3)	75445	76209	1
76128	GAT	GAC	D	D	Yes	Uridine phosphorylase (EC 2.4.2.3)	75445	76209	1
76152	GGA	GGC	G	G	Yes	Uridine phosphorylase (EC 2.4.2.3)	75445	76209	1
76217	T	G				Intergenic region
76241	C	T				Intergenic region
76282	TTA	CTA	L	L	Yes	Potassium uptake protein, integral membrane component, KtrB	76243	77622	1
76293	TTA	TTG	L	L	Yes	Potassium uptake protein, integral membrane component, KtrB	76243	77622	1
76332	GTG	GTA	V	V	Yes	Potassium uptake protein, integral membrane component, KtrB	76243	77622	1
76344	GGC	GGT	G	G	Yes	Potassium uptake protein, integral membrane component, KtrB	76243	77622	1
76347	TCG	TCT	S	S	Yes	Potassium uptake protein, integral membrane component, KtrB	76243	77622	1
76379	GGA	GAA	G	E	No	Potassium uptake protein, integral membrane component, KtrB	76243	77622	1
76419	ACT	ACC	T	T	Yes	Potassium uptake protein, integral membrane component, KtrB	76243	77622	1
76425	TCT	TCC	S	S	Yes	Potassium uptake protein, integral membrane component, KtrB	76243	77622	1
76473	TAC	TAT	Y	Y	Yes	Potassium uptake protein, integral membrane component, KtrB	76243	77622	1
76485	GGT	GGC	G	G	Yes	Potassium uptake protein, integral membrane component, KtrB	76243	77622	1
76578	AGT	AGC	S	S	Yes	Potassium uptake protein, integral membrane component, KtrB	76243	77622	1
76587	GGC	GGT	G	G	Yes	Potassium uptake protein, integral membrane component, KtrB	76243	77622	1
76596	ACC	ACT	T	T	Yes	Potassium uptake protein, integral membrane component, KtrB	76243	77622	1
76611	TTT	TTC	F	F	Yes	Potassium uptake protein, integral membrane component, KtrB	76243	77622	1
76612	GCT	AGT	A	S	No	Potassium uptake protein, integral membrane component, KtrB	76243	77622	1
76613	C	G	Merged with SNP 76612
76641	GAT	GAC	D	D	Yes	Potassium uptake protein, integral membrane component, KtrB	76243	77622	1
76650	CGT	CGC	R	R	Yes	Potassium uptake protein, integral membrane component, KtrB	76243	77622	1
76672	CTA	TTG	L	L	Yes	Potassium uptake protein, integral membrane component, KtrB	76243	77622	1
76674	A	G	Merged with SNP 76672
76684	CTC	ATC	L	I	No	Potassium uptake protein, integral membrane component, KtrB	76243	77622	1
76744	TTA	CTA	L	L	Yes	Potassium uptake protein, integral membrane component, KtrB	76243	77622	1
76779	TGT	TGC	C	C	Yes	Potassium uptake protein, integral membrane component, KtrB	76243	77622	1
76816	CTA	GTA	L	V	No	Potassium uptake protein, integral membrane component, KtrB	76243	77622	1
76875	GGT	GGG	G	G	Yes	Potassium uptake protein, integral membrane component, KtrB	76243	77622	1
76935	CGG	CGC	R	R	Yes	Potassium uptake protein, integral membrane component, KtrB	76243	77622	1
76938	CGC	CGT	R	R	Yes	Potassium uptake protein, integral membrane component, KtrB	76243	77622	1
76953	ACT	ACC	T	T	Yes	Potassium uptake protein, integral membrane component, KtrB	76243	77622	1
77244	TTT	TTC	F	F	Yes	Potassium uptake protein, integral membrane component, KtrB	76243	77622	1
77250	CGC	CGT	R	R	Yes	Potassium uptake protein, integral membrane component, KtrB	76243	77622	1
77253	AGT	AGC	S	S	Yes	Potassium uptake protein, integral membrane component, KtrB	76243	77622	1
77257	TTA	CTA	L	L	Yes	Potassium uptake protein, integral membrane component, KtrB	76243	77622	1
77283	GTA	GTG	V	V	Yes	Potassium uptake protein, integral membrane component, KtrB	76243	77622	1
77295	ACC	ACT	T	T	Yes	Potassium uptake protein, integral membrane component, KtrB	76243	77622	1
77349	CTG	CTA	L	L	Yes	Potassium uptake protein, integral membrane component, KtrB	76243	77622	1
77352	ACC	ACA	T	T	Yes	Potassium uptake protein, integral membrane component, KtrB	76243	77622	1
77373	CTA	CTG	L	L	Yes	Potassium uptake protein, integral membrane component, KtrB	76243	77622	1
77374	TTA	CTA	L	L	Yes	Potassium uptake protein, integral membrane component, KtrB	76243	77622	1
77409	ATT	ATC	I	I	Yes	Potassium uptake protein, integral membrane component, KtrB	76243	77622	1
77436	GCA	GCC	A	A	Yes	Potassium uptake protein, integral membrane component, KtrB	76243	77622	1
77451	GGA	GGG	G	G	Yes	Potassium uptake protein, integral membrane component, KtrB	76243	77622	1
78537	GCC	GCT	A	A	Yes	Cell wall surface anchor family protein	78457	80247	1
78576	GCG	GCA	A	A	Yes	Cell wall surface anchor family protein	78457	80247	1
78579	CGT	CGC	R	R	Yes	Cell wall surface anchor family protein	78457	80247	1
78615	GTA	GTG	V	V	Yes	Cell wall surface anchor family protein	78457	80247	1
78620	GGC	GAC	G	D	No	Cell wall surface anchor family protein	78457	80247	1
78642	AAG	AAA	K	K	Yes	Cell wall surface anchor family protein	78457	80247	1
78811	TCT	CCT	S	P	No	Cell wall surface anchor family protein	78457	80247	1
78859	TCT	CCT	S	P	No	Cell wall surface anchor family protein	78457	80247	1
78863	GAG	GCG	E	A	No	Cell wall surface anchor family protein	78457	80247	1
78903	GCA	GCG	A	A	Yes	Cell wall surface anchor family protein	78457	80247	1
78918	ACT	ACC	T	T	Yes	Cell wall surface anchor family protein	78457	80247	1
78939	GGT	GGC	G	G	Yes	Cell wall surface anchor family protein	78457	80247	1
79085	AAA	ACA	K	T	No	Cell wall surface anchor family protein	78457	80247	1
79157	GGT	GAT	G	D	No	Cell wall surface anchor family protein	78457	80247	1
79166	ACA	AGA	T	R	No	Cell wall surface anchor family protein	78457	80247	1
79196	GAA	GGA	E	G	No	Cell wall surface anchor family protein	78457	80247	1
79250	AAA	AGA	K	R	No	Cell wall surface anchor family protein	78457	80247	1
79265	GAC	GGC	D	G	No	Cell wall surface anchor family protein	78457	80247	1
79268	AAC	AAC	N	N	Yes	Cell wall surface anchor family protein	78457	80247	1
79277	GCT	GAT	A	D	No	Cell wall surface anchor family protein	78457	80247	1
79391	AAA	AAA	K	K	Yes	Cell wall surface anchor family protein	78457	80247	1
79415	AAA	AAA	K	K	Yes	Cell wall surface anchor family protein	78457	80247	1
79418	GCT	GGT	A	G	No	Cell wall surface anchor family protein	78457	80247	1
79478	ACT	ACT	T	T	Yes	Cell wall surface anchor family protein	78457	80247	1
79538	GTT	GGT	V	G	No	Cell wall surface anchor family protein	78457	80247	1
79541	GTT	GCT	V	A	No	Cell wall surface anchor family protein	78457	80247	1
79595	AAT	AAT	N	N	Yes	Cell wall surface anchor family protein	78457	80247	1
79601	CCG	CCG	P	P	Yes	Cell wall surface anchor family protein	78457	80247	1
79613	TTG	TCG	L	S	No	Cell wall surface anchor family protein	78457	80247	1
79616	GCC	GAC	A	D	No	Cell wall surface anchor family protein	78457	80247	1
79697	AAA	AAA	K	K	Yes	Cell wall surface anchor family protein	78457	80247	1
79699	GCC	CCC	A	P	No	Cell wall surface anchor family protein	78457	80247	1
79702	CCA	TCA	P	S	No	Cell wall surface anchor family protein	78457	80247	1
79703	T	C	Merged with SNP 79702
79736	GCT	GTT	A	V	No	Cell wall surface anchor family protein	78457	80247	1
79751	GAA	GAA	E	E	Yes	Cell wall surface anchor family protein	78457	80247	1
79790	TTG	TAG	L	*	No	Cell wall surface anchor family protein	78457	80247	1
79814	GAT	GAT	D	D	Yes	Cell wall surface anchor family protein	78457	80247	1
79829	CTG	CAG	L	Q	No	Cell wall surface anchor family protein	78457	80247	1
79904	CCT	CAT	P	H	No	Cell wall surface anchor family protein	78457	80247	1
79934	CAA	CAA	Q	Q	Yes	Cell wall surface anchor family protein	78457	80247	1
79952	CGT	CGT	R	R	Yes	Cell wall surface anchor family protein	78457	80247	1
80015	ACA	AAA	T	K	No	Cell wall surface anchor family protein	78457	80247	1
80135	ATG	AAG	M	K	No	Cell wall surface anchor family protein	78457	80247	1
80159	AAA	AGA	K	R	No	Cell wall surface anchor family protein	78457	80247	1
80165	GCT	GGT	A	G	No	Cell wall surface anchor family protein	78457	80247	1
80219	TTG	TGG	L	W	No	Cell wall surface anchor family protein	78457	80247	1
80224	TTG	CTG	L	L	Yes	Cell wall surface anchor family protein	78457	80247	1
80225	C	T	Merged with SNP 80224
80234	AAA	ATA	K	I	No	Cell wall surface anchor family protein	78457	80247	1
80258	G	A				Intergenic region
80267	A	G				Intergenic region
80273	A	G				Intergenic region
80330	ATG	ATG	M	M	Yes	Two-component response regulator SA14-24	80328	81026	1
80333	AAA	AAG	K	K	Yes	Two-component response regulator SA14-24	80328	81026	1
80348	CTG	CTT	L	L	Yes	Two-component response regulator SA14-24	80328	81026	1
80351	GTT	GTA	V	V	Yes	Two-component response regulator SA14-24	80328	81026	1
80357	GAT	GAC	D	D	Yes	Two-component response regulator SA14-24	80328	81026	1
80496	CCC	CCC	P	P	Yes	Two-component response regulator SA14-24	80328	81026	1
80508	GGT	AGT	G	S	No	Two-component response regulator SA14-24	80328	81026	1
80576	AAG	AAG	K	K	Yes	Two-component response regulator SA14-24	80328	81026	1
80635	AAG	AGG	K	R	No	Two-component response regulator SA14-24	80328	81026	1
80648	CCA	CCG	P	P	Yes	Two-component response regulator SA14-24	80328	81026	1
81008	AAA	AAA	K	K	Yes	Two-component response regulator SA14-24	80328	81026	1
81128	GTT	TTT	V	F	No	Two-component sensor kinase SA14-24	81023	82057	1
81140	GTT	ATT	V	I	No	Two-component sensor kinase SA14-24	81023	82057	1
81182	AGT	TGT	S	C	No	Two-component sensor kinase SA14-24	81023	82057	1
81230	AAA	GAA	K	E	No	Two-component sensor kinase SA14-24	81023	82057	1
81296	TTT	GTT	F	V	No	Two-component sensor kinase SA14-24	81023	82057	1
81324	GAC	GCC	D	A	No	Two-component sensor kinase SA14-24	81023	82057	1
81371	GAG	AAG	E	K	No	Two-component sensor kinase SA14-24	81023	82057	1
81398	CAG	GAG	Q	E	No	Two-component sensor kinase SA14-24	81023	82057	1
81403	CTC	CTG	L	L	Yes	Two-component sensor kinase SA14-24	81023	82057	1
81485	CGG	GGG	R	G	No	Two-component sensor kinase SA14-24	81023	82057	1
81507	ATT	ACT	I	T	No	Two-component sensor kinase SA14-24	81023	82057	1
81585	ACT	AGT	T	S	No	Two-component sensor kinase SA14-24	81023	82057	1
81654	CTC	CGC	L	R	No	Two-component sensor kinase SA14-24	81023	82057	1
81678	GAT	GGT	D	G	No	Two-component sensor kinase SA14-24	81023	82057	1
81708	GCG	GCG	A	A	Yes	Two-component sensor kinase SA14-24	81023	82057	1
81753	AAT	ACT	N	T	No	Two-component sensor kinase SA14-24	81023	82057	1
81783	GAA	GAA	E	E	Yes	Two-component sensor kinase SA14-24	81023	82057	1
81791	ACC	GCC	T	A	No	Two-component sensor kinase SA14-24	81023	82057	1
81798	ATC	AAC	I	N	No	Two-component sensor kinase SA14-24	81023	82057	1
81801	GAG	GGG	E	G	No	Two-component sensor kinase SA14-24	81023	82057	1
81861	GGG	GTG	G	V	No	Two-component sensor kinase SA14-24	81023	82057	1
81867	CTT	CGT	L	R	No	Two-component sensor kinase SA14-24	81023	82057	1
81891	TTT	TCT	F	S	No	Two-component sensor kinase SA14-24	81023	82057	1
81894	AAA	AAA	K	K	Yes	Two-component sensor kinase SA14-24	81023	82057	1
81917	TCG	ACG	S	T	No	Two-component sensor kinase SA14-24	81023	82057	1
81942	CAT	CGT	H	R	No	Two-component sensor kinase SA14-24	81023	82057	1
81945	GGC	GAC	G	D	No	Two-component sensor kinase SA14-24	81023	82057	1
81954	CTT	CAT	L	H	No	Two-component sensor kinase SA14-24	81023	82057	1
81972	CTA	CTA	L	L	Yes	Two-component sensor kinase SA14-24	81023	82057	1
81987	GGT	GGT	G	G	Yes	Two-component sensor kinase SA14-24	81023	82057	1
82035	ACA	ATA	T	I	No	Two-component sensor kinase SA14-24	81023	82057	1
82037	TTC	TTC	F	F	Yes	Two-component sensor kinase SA14-24	81023	82057	1
82041	AGC	ATC	S	I	No	Two-component sensor kinase SA14-24	81023	82057	1
82044	CTC	CCC	L	P	No	Two-component sensor kinase SA14-24	81023	82057	1
82047	AAT	AAT	N	N	Yes	Two-component sensor kinase SA14-24	81023	82057	1
82098	A	G				Intergenic region
82239	T	C				Intergenic region
82308	CTT	CCT	L	P	No	SSU ribosomal protein S4p (S9e)	82259	82870	1
82332	GAA	GGA	E	G	No	SSU ribosomal protein S4p (S9e)	82259	82870	1
82371	CCA	CGA	P	R	No	SSU ribosomal protein S4p (S9e)	82259	82870	1
82392	TCA	TTA	S	L	No	SSU ribosomal protein S4p (S9e)	82259	82870	1
82401	GGT	GAT	G	D	No	SSU ribosomal protein S4p (S9e)	82259	82870	1
82410	TTG	TCG	L	S	No	SSU ribosomal protein S4p (S9e)	82259	82870	1
82440	TAC	TAC	Y	Y	Yes	SSU ribosomal protein S4p (S9e)	82259	82870	1
82452	GAA	GGA	E	G	No	SSU ribosomal protein S4p (S9e)	82259	82870	1
82485	ACA	AGA	T	R	No	SSU ribosomal protein S4p (S9e)	82259	82870	1
82524	CTT	CGT	L	R	No	SSU ribosomal protein S4p (S9e)	82259	82870	1
82527	CTT	CGT	L	R	No	SSU ribosomal protein S4p (S9e)	82259	82870	1
82575	ACT	AAT	T	N	No	SSU ribosomal protein S4p (S9e)	82259	82870	1
82590	GCT	GGT	A	G	No	SSU ribosomal protein S4p (S9e)	82259	82870	1
82623	GTT	GGT	V	G	No	SSU ribosomal protein S4p (S9e)	82259	82870	1
82638	GTT	GCT	V	A	No	SSU ribosomal protein S4p (S9e)	82259	82870	1
82655	CGT	AGT	R	S	No	SSU ribosomal protein S4p (S9e)	82259	82870	1
82674	GTA	GGA	V	G	No	SSU ribosomal protein S4p (S9e)	82259	82870	1
82698	TTG	TTG	L	L	Yes	SSU ribosomal protein S4p (S9e)	82259	82870	1
82761	TTC	TGC	F	C	No	SSU ribosomal protein S4p (S9e)	82259	82870	1
82800	CCA	CAA	P	Q	No	SSU ribosomal protein S4p (S9e)	82259	82870	1
82809	GAC	GAC	D	D	Yes	SSU ribosomal protein S4p (S9e)	82259	82870	1
82830	AAC	AGC	N	S	No	SSU ribosomal protein S4p (S9e)	82259	82870	1
83013	T	C				Intergenic region
83034	C	T				Intergenic region
83049	T	C				Intergenic region
83064	T	G				Intergenic region
83138	T	C				Intergenic region
83156	G	A				Intergenic region
91466	GGT	GCT	G	A	No	Dihydroxy-acid dehydratase (EC 4.2.1.9)	89965	91668	1
92476	AGT	AGT	S	S	Yes	Positive transcriptional regulator, MutR family	92308	93159	1
92920	AGC	CGC	S	R	No	Positive transcriptional regulator, MutR family	92308	93159	1
92989	GAA	AAA	E	K	No	Positive transcriptional regulator, MutR family	92308	93159	1
93037	CTT	CTT	L	L	Yes	Positive transcriptional regulator, MutR family	92308	93159	1
93052	GGT	AGT	G	S	No	Positive transcriptional regulator, MutR family	92308	93159	1
93063	AAG	AAT	K	N	No	Positive transcriptional regulator, MutR family	92308	93159	1
93178	G	A				Intergenic region
93196	G	A				Intergenic region
93244	C	T				Intergenic region
93340	A	G				Intergenic region
93379	CAA	CCA	Q	P	No	Macrolide-efflux protein	93357	94604	1
93424	GGT	GGT	G	G	Yes	Macrolide-efflux protein	93357	94604	1
93517	CTT	CGT	L	R	No	Macrolide-efflux protein	93357	94604	1
93520	CCG	CGG	P	R	No	Macrolide-efflux protein	93357	94604	1
93565	AGG	AGG	R	R	Yes	Macrolide-efflux protein	93357	94604	1
93642	CAA	GAA	Q	E	No	Macrolide-efflux protein	93357	94604	1
93655	TTT	TGT	F	C	No	Macrolide-efflux protein	93357	94604	1
93661	TTT	TAT	F	Y	No	Macrolide-efflux protein	93357	94604	1
93685	GTC	GTC	V	V	Yes	Macrolide-efflux protein	93357	94604	1
93703	AGT	AAT	S	N	No	Macrolide-efflux protein	93357	94604	1
93707	GAT	GAT	D	D	Yes	Macrolide-efflux protein	93357	94604	1
93729	CCC	CCC	P	P	Yes	Macrolide-efflux protein	93357	94604	1
93757	GGG	GCG	G	A	No	Macrolide-efflux protein	93357	94604	1
93765	ATG	CTG	M	L	No	Macrolide-efflux protein	93357	94604	1
93788	CAG	CAA	Q	Q	Yes	Macrolide-efflux protein	93357	94604	1
94067	GGT	GGT	G	G	Yes	Macrolide-efflux protein	93357	94604	1
94091	CTT	CTC	L	L	Yes	Macrolide-efflux protein	93357	94604	1
94160	AAT	AAA	N	K	No	Macrolide-efflux protein	93357	94604	1
94176	GCA	CCA	A	P	No	Macrolide-efflux protein	93357	94604	1
94340	GGT	GGG	G	G	Yes	Macrolide-efflux protein	93357	94604	1
94412	AAA	AAC	K	N	No	Macrolide-efflux protein	93357	94604	1
94413	AAT	GAT	N	D	No	Macrolide-efflux protein	93357	94604	1
94502	TCA	TCT	S	S	Yes	Macrolide-efflux protein	93357	94604	1
94523	ATA	ATC	I	I	Yes	Macrolide-efflux protein	93357	94604	1
94559	TTG	TTC	L	F	No	Macrolide-efflux protein	93357	94604	1
94598	GAT	GAA	D	E	No	Macrolide-efflux protein	93357	94604	1
94646	T	G				Intergenic region
94652	A	T				Intergenic region
94658	C	A				Intergenic region
94712	GAT	TAT	D	Y	No	Histidyl-tRNA synthetase (EC 6.1.1.21)	94682	95962	1
94718	TTA	TTA	L	L	Yes	Histidyl-tRNA synthetase (EC 6.1.1.21)	94682	95962	1
94721	CCT	CCT	P	P	Yes	Histidyl-tRNA synthetase (EC 6.1.1.21)	94682	95962	1
94736	AAG	TAG	K	*	No	Histidyl-tRNA synthetase (EC 6.1.1.21)	94682	95962	1
94766	GAA	TAA	E	*	No	Histidyl-tRNA synthetase (EC 6.1.1.21)	94682	95962	1
94778	CGC	CGC	R	R	Yes	Histidyl-tRNA synthetase (EC 6.1.1.21)	94682	95962	1
94790	GCG	TCG	A	S	No	Histidyl-tRNA synthetase (EC 6.1.1.21)	94682	95962	1
94796	GTG	ATG	V	M	No	Histidyl-tRNA synthetase (EC 6.1.1.21)	94682	95962	1
94940	GTC	CTC	V	L	No	Histidyl-tRNA synthetase (EC 6.1.1.21)	94682	95962	1
94967	TTC	CTC	F	L	No	Histidyl-tRNA synthetase (EC 6.1.1.21)	94682	95962	1
95036	CAG	AAG	Q	K	No	Histidyl-tRNA synthetase (EC 6.1.1.21)	94682	95962	1
95037	C	A	Merged with SNP 95036
95042	GGG	AGG	G	R	No	Histidyl-tRNA synthetase (EC 6.1.1.21)	94682	95962	1
95093	AAT	TAT	N	Y	No	Histidyl-tRNA synthetase (EC 6.1.1.21)	94682	95962	1
95096	CCA	ACA	P	T	No	Histidyl-tRNA synthetase (EC 6.1.1.21)	94682	95962	1
95117	ATC	CTC	I	L	No	Histidyl-tRNA synthetase (EC 6.1.1.21)	94682	95962	1
95120	GCT	CCT	A	P	No	Histidyl-tRNA synthetase (EC 6.1.1.21)	94682	95962	1
95126	GCA	CCA	A	P	No	Histidyl-tRNA synthetase (EC 6.1.1.21)	94682	95962	1
95132	CAT	TAT	H	Y	No	Histidyl-tRNA synthetase (EC 6.1.1.21)	94682	95962	1
95207	GCT	CCT	A	P	No	Histidyl-tRNA synthetase (EC 6.1.1.21)	94682	95962	1
95231	TAT	GAT	Y	D	No	Histidyl-tRNA synthetase (EC 6.1.1.21)	94682	95962	1
95240	CCA	TCA	P	S	No	Histidyl-tRNA synthetase (EC 6.1.1.21)	94682	95962	1
97880	TCA	TCA	S	S	Yes	Membrane-bound protease, CAAX family	97792	98433	1
98478	ATA	ATA	I	I	Yes	FIG01114689: hypothetical protein	98451	98669	1
98580	GGT	CTT	G	L	No	FIG01114689: hypothetical protein	98451	98669	1
98581	C	T	Merged with SNP 98580
98583	GTC	ATC	V	I	No	FIG01114689: hypothetical protein	98451	98669	1
98601	GCT	TCT	A	S	No	FIG01114689: hypothetical protein	98451	98669	1
98619	GTT	CTT	V	L	No	FIG01114689: hypothetical protein	98451	98669	1
98622	CTA	ACA	L	T	No	FIG01114689: hypothetical protein	98451	98669	1
98623	T	C	Merged with SNP 98622
98628	AAA	AAA	K	K	Yes	FIG01114689: hypothetical protein	98451	98669	1
98723	A	T				Intergenic region
98800	A	G				Intergenic region
98820	G	A				Intergenic region
98821	ATG	TTG	M	L	No	Aspartyl-tRNA synthetase (EC 6.1.1.12)	98821	100584	1
99249	CTT	CTG	L	L	Yes	Aspartyl-tRNA synthetase (EC 6.1.1.12)	98821	100584	1
99366	CCA	CCG	P	P	Yes	Aspartyl-tRNA synthetase (EC 6.1.1.12)	98821	100584	1
99468	GTT	GTG	V	V	Yes	Aspartyl-tRNA synthetase (EC 6.1.1.12)	98821	100584	1
99477	TTC	TTG	F	L	No	Aspartyl-tRNA synthetase (EC 6.1.1.12)	98821	100584	1
99492	TTG	TTT	L	F	No	Aspartyl-tRNA synthetase (EC 6.1.1.12)	98821	100584	1
99501	GAC	GAG	D	E	No	Aspartyl-tRNA synthetase (EC 6.1.1.12)	98821	100584	1
99534	GAA	GAT	E	D	No	Aspartyl-tRNA synthetase (EC 6.1.1.12)	98821	100584	1
99579	GGA	GGG	G	G	Yes	Aspartyl-tRNA synthetase (EC 6.1.1.12)	98821	100584	1
99585	ATT	ATG	I	M	No	Aspartyl-tRNA synthetase (EC 6.1.1.12)	98821	100584	1
99609	AAA	AAT	K	N	No	Aspartyl-tRNA synthetase (EC 6.1.1.12)	98821	100584	1
99630	CCA	CCT	P	P	Yes	Aspartyl-tRNA synthetase (EC 6.1.1.12)	98821	100584	1
99657	GCG	GCT	A	A	Yes	Aspartyl-tRNA synthetase (EC 6.1.1.12)	98821	100584	1
99729	GTC	GTG	V	V	Yes	Aspartyl-tRNA synthetase (EC 6.1.1.12)	98821	100584	1
99783	GTA	GTT	V	V	Yes	Aspartyl-tRNA synthetase (EC 6.1.1.12)	98821	100584	1
99786	GTC	GTA	V	V	Yes	Aspartyl-tRNA synthetase (EC 6.1.1.12)	98821	100584	1
99808	TCA	GCA	S	A	No	Aspartyl-tRNA synthetase (EC 6.1.1.12)	98821	100584	1
99816	AAA	AAG	K	K	Yes	Aspartyl-tRNA synthetase (EC 6.1.1.12)	98821	100584	1
99819	GAC	GAA	D	E	No	Aspartyl-tRNA synthetase (EC 6.1.1.12)	98821	100584	1
99864	GGT	GGA	G	G	Yes	Aspartyl-tRNA synthetase (EC 6.1.1.12)	98821	100584	1
99909	GTT	GTA	V	V	Yes	Aspartyl-tRNA synthetase (EC 6.1.1.12)	98821	100584	1
100056	GGC	GGC	G	G	Yes	Aspartyl-tRNA synthetase (EC 6.1.1.12)	98821	100584	1
100095	GTT	GTT	V	V	Yes	Aspartyl-tRNA synthetase (EC 6.1.1.12)	98821	100584	1
100125	GAA	GAA	E	E	Yes	Aspartyl-tRNA synthetase (EC 6.1.1.12)	98821	100584	1
100128	GAA	GAC	E	D	No	Aspartyl-tRNA synthetase (EC 6.1.1.12)	98821	100584	1
100140	ATG	ATT	M	I	No	Aspartyl-tRNA synthetase (EC 6.1.1.12)	98821	100584	1
100158	TTT	TTT	F	F	Yes	Aspartyl-tRNA synthetase (EC 6.1.1.12)	98821	100584	1
100179	ACA	ACA	T	T	Yes	Aspartyl-tRNA synthetase (EC 6.1.1.12)	98821	100584	1
100182	GCT	GCA	A	A	Yes	Aspartyl-tRNA synthetase (EC 6.1.1.12)	98821	100584	1
100184	CAC	CGC	H	R	No	Aspartyl-tRNA synthetase (EC 6.1.1.12)	98821	100584	1
100190	TTA	TGA	L	*	No	Aspartyl-tRNA synthetase (EC 6.1.1.12)	98821	100584	1
100212	GTT	GTC	V	V	Yes	Aspartyl-tRNA synthetase (EC 6.1.1.12)	98821	100584	1
100214	CGT	CAT	R	H	No	Aspartyl-tRNA synthetase (EC 6.1.1.12)	98821	100584	1
100215	CGT	CGG	R	R	Yes	Aspartyl-tRNA synthetase (EC 6.1.1.12)	98821	100584	1
100224	GCT	GCA	A	A	Yes	Aspartyl-tRNA synthetase (EC 6.1.1.12)	98821	100584	1
100314	CTT	CTG	L	L	Yes	Aspartyl-tRNA synthetase (EC 6.1.1.12)	98821	100584	1
100326	GCT	GCT	A	A	Yes	Aspartyl-tRNA synthetase (EC 6.1.1.12)	98821	100584	1
100335	GCA	GCA	A	A	Yes	Aspartyl-tRNA synthetase (EC 6.1.1.12)	98821	100584	1
100338	AAT	AAA	N	K	No	Aspartyl-tRNA synthetase (EC 6.1.1.12)	98821	100584	1
100344	CAG	CAA	Q	Q	Yes	Aspartyl-tRNA synthetase (EC 6.1.1.12)	98821	100584	1
100443	GAA	GAC	E	D	No	Aspartyl-tRNA synthetase (EC 6.1.1.12)	98821	100584	1
100466	TTT	TCT	F	S	No	Aspartyl-tRNA synthetase (EC 6.1.1.12)	98821	100584	1
100551	CAA	CAA	Q	Q	Yes	Aspartyl-tRNA synthetase (EC 6.1.1.12)	98821	100584	1
100572	AGC	AGT	S	S	Yes	Aspartyl-tRNA synthetase (EC 6.1.1.12)	98821	100584	1
100578	ACA	ACT	T	T	Yes	Aspartyl-tRNA synthetase (EC 6.1.1.12)	98821	100584	1
100635	CGA	CAA	R	Q	No	Integral membrane protein	100562	101503	1
100674	AAA	AAA	K	K	Yes	Integral membrane protein	100562	101503	1
100683	GCC	GTC	A	V	No	Integral membrane protein	100562	101503	1
100692	GTT	GAT	V	D	No	Integral membrane protein	100562	101503	1
100707	TCA	TTA	S	L	No	Integral membrane protein	100562	101503	1
100740	GGG	GAG	G	E	No	Integral membrane protein	100562	101503	1
100800	CAC	CAC	H	H	Yes	Integral membrane protein	100562	101503	1
100818	ATT	AGT	I	S	No	Integral membrane protein	100562	101503	1
100842	GCT	GTT	A	V	No	Integral membrane protein	100562	101503	1
100944	CTT	CAT	L	H	No	Integral membrane protein	100562	101503	1
100947	GTG	GAG	V	E	No	Integral membrane protein	100562	101503	1
100953	GTT	GAT	V	D	No	Integral membrane protein	100562	101503	1
100959	ACC	AGC	T	S	No	Integral membrane protein	100562	101503	1
100971	GAT	GTT	D	V	No	Integral membrane protein	100562	101503	1
100974	CCC	CGC	P	R	No	Integral membrane protein	100562	101503	1
100983	AAT	AAT	N	N	Yes	Integral membrane protein	100562	101503	1
101013	TTG	TTG	L	L	Yes	Integral membrane protein	100562	101503	1
101043	ATT	AGT	I	S	No	Integral membrane protein	100562	101503	1
101052	GGA	GTA	G	V	No	Integral membrane protein	100562	101503	1
101094	GGG	GGG	G	G	Yes	Integral membrane protein	100562	101503	1
101100	AAT	AGT	N	S	No	Integral membrane protein	100562	101503	1
101157	ACC	AGC	T	S	No	Integral membrane protein	100562	101503	1
101166	TGG	TCG	W	S	No	Integral membrane protein	100562	101503	1
101219	GAC	TAC	D	Y	No	Integral membrane protein	100562	101503	1
101229	TTT	TCT	F	S	No	Integral membrane protein	100562	101503	1
101244	CGC	CAC	R	H	No	Integral membrane protein	100562	101503	1
101283	GTA	GAA	V	E	No	Integral membrane protein	100562	101503	1
101310	CAC	CGC	H	R	No	Integral membrane protein	100562	101503	1
101394	GCA	GAA	A	E	No	Integral membrane protein	100562	101503	1
101436	CCG	CGG	P	R	No	Integral membrane protein	100562	101503	1
101466	GTC	GGC	V	G	No	Integral membrane protein	100562	101503	1
101533	A	G				Intergenic region
101578	TGT	GGT	C	G	No	Maltose operon transcriptional repressor MalR, LacI family	101537	102523	-1
101623	ACC	CCC	T	P	No	Maltose operon transcriptional repressor MalR, LacI family	101537	102523	-1
101635	GTT	GTT	V	V	Yes	Maltose operon transcriptional repressor MalR, LacI family	101537	102523	-1
101639	GGG	GGT	G	G	Yes	Maltose operon transcriptional repressor MalR, LacI family	101537	102523	-1
101647	GAA	TAA	E	*	No	Maltose operon transcriptional repressor MalR, LacI family	101537	102523	-1
101653	AGT	AGT	S	S	Yes	Maltose operon transcriptional repressor MalR, LacI family	101537	102523	-1
101655	AAT	ATT	N	I	No	Maltose operon transcriptional repressor MalR, LacI family	101537	102523	-1
101704	TTC	TTC	F	F	Yes	Maltose operon transcriptional repressor MalR, LacI family	101537	102523	-1
101707	AGT	CGT	S	R	No	Maltose operon transcriptional repressor MalR, LacI family	101537	102523	-1
101731	TAT	TAT	Y	Y	Yes	Maltose operon transcriptional repressor MalR, LacI family	101537	102523	-1
101737	AGT	AGT	S	S	Yes	Maltose operon transcriptional repressor MalR, LacI family	101537	102523	-1
101803	GAT	AAT	D	N	No	Maltose operon transcriptional repressor MalR, LacI family	101537	102523	-1
101824	AGT	CGT	S	R	No	Maltose operon transcriptional repressor MalR, LacI family	101537	102523	-1
101827	TTC	GTC	F	V	No	Maltose operon transcriptional repressor MalR, LacI family	101537	102523	-1
101836	GGG	CGG	G	R	No	Maltose operon transcriptional repressor MalR, LacI family	101537	102523	-1
101866	TAC	CAC	Y	H	No	Maltose operon transcriptional repressor MalR, LacI family	101537	102523	-1
101917	TAT	CAT	Y	H	No	Maltose operon transcriptional repressor MalR, LacI family	101537	102523	-1
101935	CAA	AAA	Q	K	No	Maltose operon transcriptional repressor MalR, LacI family	101537	102523	-1
101950	CGA	CGA	R	R	Yes	Maltose operon transcriptional repressor MalR, LacI family	101537	102523	-1
101956	ACA	TCA	T	S	No	Maltose operon transcriptional repressor MalR, LacI family	101537	102523	-1
101968	TTT	GTT	F	V	No	Maltose operon transcriptional repressor MalR, LacI family	101537	102523	-1
101972	ATT	ATG	I	M	No	Maltose operon transcriptional repressor MalR, LacI family	101537	102523	-1
102052	ATC	GTC	I	V	No	Maltose operon transcriptional repressor MalR, LacI family	101537	102523	-1
102178	ATG	TTG	M	L	No	Maltose operon transcriptional repressor MalR, LacI family	101537	102523	-1
102186	ATT	AAT	I	N	No	Maltose operon transcriptional repressor MalR, LacI family	101537	102523	-1
102199	CGT	TGT	R	C	No	Maltose operon transcriptional repressor MalR, LacI family	101537	102523	-1
102238	TAC	CAC	Y	H	No	Maltose operon transcriptional repressor MalR, LacI family	101537	102523	-1
102256	GTT	ATT	V	I	No	Maltose operon transcriptional repressor MalR, LacI family	101537	102523	-1
102286	TTC	TTC	F	F	Yes	Maltose operon transcriptional repressor MalR, LacI family	101537	102523	-1
102305	GCC	GCA	A	A	Yes	Maltose operon transcriptional repressor MalR, LacI family	101537	102523	-1
102325	TTG	CTG	L	L	Yes	Maltose operon transcriptional repressor MalR, LacI family	101537	102523	-1
102361	CTA	ATA	L	I	No	Maltose operon transcriptional repressor MalR, LacI family	101537	102523	-1
102379	AAT	GAT	N	D	No	Maltose operon transcriptional repressor MalR, LacI family	101537	102523	-1
102385	CAT	CAT	H	H	Yes	Maltose operon transcriptional repressor MalR, LacI family	101537	102523	-1
102400	AAG	TAG	K	*	No	Maltose operon transcriptional repressor MalR, LacI family	101537	102523	-1
102412	CGC	TGC	R	C	No	Maltose operon transcriptional repressor MalR, LacI family	101537	102523	-1
102445	TCA	CCA	S	P	No	Maltose operon transcriptional repressor MalR, LacI family	101537	102523	-1
102505	GAT	GAT	D	D	Yes	Maltose operon transcriptional repressor MalR, LacI family	101537	102523	-1
102517	GTT	TTT	V	F	No	Maltose operon transcriptional repressor MalR, LacI family	101537	102523	-1
102520	CCC	CCC	P	P	Yes	Maltose operon transcriptional repressor MalR, LacI family	101537	102523	-1
102577	ATC	CTC	I	L	No	Maltodextrose utilization protein MalA	102533	103333	-1
102589	TAT	GAT	Y	D	No	Maltodextrose utilization protein MalA	102533	103333	-1
102592	CTT	TTT	L	F	No	Maltodextrose utilization protein MalA	102533	103333	-1
102595	GTT	TTT	V	F	No	Maltodextrose utilization protein MalA	102533	103333	-1
102624	ACC	AAC	T	N	No	Maltodextrose utilization protein MalA	102533	103333	-1
102641	TTT	TTA	F	L	No	Maltodextrose utilization protein MalA	102533	103333	-1
102649	GGA	TGA	G	*	No	Maltodextrose utilization protein MalA	102533	103333	-1
102667	CTG	CTG	L	L	Yes	Maltodextrose utilization protein MalA	102533	103333	-1
102679	GGA	AGA	G	R	No	Maltodextrose utilization protein MalA	102533	103333	-1
102724	TTT	TTT	F	F	Yes	Maltodextrose utilization protein MalA	102533	103333	-1
102730	TTT	TTT	F	F	Yes	Maltodextrose utilization protein MalA	102533	103333	-1
102739	TCA	CCA	S	P	No	Maltodextrose utilization protein MalA	102533	103333	-1
102766	AGT	TGT	S	C	No	Maltodextrose utilization protein MalA	102533	103333	-1
102769	GCT	CCT	A	P	No	Maltodextrose utilization protein MalA	102533	103333	-1
102775	CTT	CTT	L	L	Yes	Maltodextrose utilization protein MalA	102533	103333	-1
102777	TCT	TCT	S	S	Yes	Maltodextrose utilization protein MalA	102533	103333	-1
102823	GTC	ATC	V	I	No	Maltodextrose utilization protein MalA	102533	103333	-1
102835	AGT	GGT	S	G	No	Maltodextrose utilization protein MalA	102533	103333	-1
102868	AAA	AAA	K	K	Yes	Maltodextrose utilization protein MalA	102533	103333	-1
102877	GCT	CCT	A	P	No	Maltodextrose utilization protein MalA	102533	103333	-1
102907	AGT	GGT	S	G	No	Maltodextrose utilization protein MalA	102533	103333	-1
102922	GCC	TCC	A	S	No	Maltodextrose utilization protein MalA	102533	103333	-1
102925	CAC	TAC	H	Y	No	Maltodextrose utilization protein MalA	102533	103333	-1
102943	CTG	ATG	L	M	No	Maltodextrose utilization protein MalA	102533	103333	-1
102946	GAA	CAA	E	Q	No	Maltodextrose utilization protein MalA	102533	103333	-1
102976	GAA	GAA	E	E	Yes	Maltodextrose utilization protein MalA	102533	103333	-1
103082	GAT	GAA	D	E	No	Maltodextrose utilization protein MalA	102533	103333	-1
103092	CAG	CTG	Q	L	No	Maltodextrose utilization protein MalA	102533	103333	-1
103095	GCG	GGG	A	G	No	Maltodextrose utilization protein MalA	102533	103333	-1
103100	GAG	GAG	E	E	Yes	Maltodextrose utilization protein MalA	102533	103333	-1
103104	TCG	TTG	S	L	No	Maltodextrose utilization protein MalA	102533	103333	-1
103129	ACA	ACA	T	T	Yes	Maltodextrose utilization protein MalA	102533	103333	-1
103337	A	G				Intergenic region
103338	A	G				Intergenic region
103454	A	C				Intergenic region
103456	A	T				Intergenic region
103542	GGA	GAA	G	E	No	Maltose/maltodextrin ABC transporter, permease protein MalG	103514	104356	-1
103551	TTT	TTT	F	F	Yes	Maltose/maltodextrin ABC transporter, permease protein MalG	103514	104356	-1
103554	AAC	AAC	N	N	Yes	Maltose/maltodextrin ABC transporter, permease protein MalG	103514	104356	-1
103584	ATC	AAC	I	N	No	Maltose/maltodextrin ABC transporter, permease protein MalG	103514	104356	-1
103590	CTT	CTT	L	L	Yes	Maltose/maltodextrin ABC transporter, permease protein MalG	103514	104356	-1
103680	TTT	TAT	F	Y	No	Maltose/maltodextrin ABC transporter, permease protein MalG	103514	104356	-1
103791	ATT	AAT	I	N	No	Maltose/maltodextrin ABC transporter, permease protein MalG	103514	104356	-1
103803	CGC	CAC	R	H	No	Maltose/maltodextrin ABC transporter, permease protein MalG	103514	104356	-1
103932	TGG	TGG	W	W	Yes	Maltose/maltodextrin ABC transporter, permease protein MalG	103514	104356	-1
103968	GTT	GAT	V	D	No	Maltose/maltodextrin ABC transporter, permease protein MalG	103514	104356	-1
104091	AGT	ATT	S	I	No	Maltose/maltodextrin ABC transporter, permease protein MalG	103514	104356	-1
104100	GTT	GGT	V	G	No	Maltose/maltodextrin ABC transporter, permease protein MalG	103514	104356	-1
104304	CTC	CAC	L	H	No	Maltose/maltodextrin ABC transporter, permease protein MalG	103514	104356	-1
104307	TAC	TTC	Y	F	No	Maltose/maltodextrin ABC transporter, permease protein MalG	103514	104356	-1
104673	AAT	AAG	N	K	No	Maltose/maltodextrin ABC transporter, permease protein MalF	104358	105650	-1
104906	TTT	ATT	F	I	No	Maltose/maltodextrin ABC transporter, permease protein MalF	104358	105650	-1
104911	AAC	AAC	N	N	Yes	Maltose/maltodextrin ABC transporter, permease protein MalF	104358	105650	-1
104914	TCA	TTA	S	L	No	Maltose/maltodextrin ABC transporter, permease protein MalF	104358	105650	-1
104915	TCA	CCA	S	P	No	Maltose/maltodextrin ABC transporter, permease protein MalF	104358	105650	-1
104917	TTC	TCC	F	S	No	Maltose/maltodextrin ABC transporter, permease protein MalF	104358	105650	-1
104953	CCT	CCT	P	P	Yes	Maltose/maltodextrin ABC transporter, permease protein MalF	104358	105650	-1
104968	GTT	GGT	V	G	No	Maltose/maltodextrin ABC transporter, permease protein MalF	104358	105650	-1
105016	GCG	GTG	A	V	No	Maltose/maltodextrin ABC transporter, permease protein MalF	104358	105650	-1
105019	ACA	AGA	T	R	No	Maltose/maltodextrin ABC transporter, permease protein MalF	104358	105650	-1
105022	TTC	TAC	F	Y	No	Maltose/maltodextrin ABC transporter, permease protein MalF	104358	105650	-1
105158	TTG	GTG	L	V	No	Maltose/maltodextrin ABC transporter, permease protein MalF	104358	105650	-1
105241	TTT	TAT	F	Y	No	Maltose/maltodextrin ABC transporter, permease protein MalF	104358	105650	-1
105247	ATG	AAG	M	K	No	Maltose/maltodextrin ABC transporter, permease protein MalF	104358	105650	-1
105253	GTA	GGA	V	G	No	Maltose/maltodextrin ABC transporter, permease protein MalF	104358	105650	-1
105259	TCG	TGG	S	W	No	Maltose/maltodextrin ABC transporter, permease protein MalF	104358	105650	-1
105268	ATT	AAT	I	N	No	Maltose/maltodextrin ABC transporter, permease protein MalF	104358	105650	-1
105271	TTG	TGG	L	W	No	Maltose/maltodextrin ABC transporter, permease protein MalF	104358	105650	-1
105274	CTT	CGT	L	R	No	Maltose/maltodextrin ABC transporter, permease protein MalF	104358	105650	-1
105277	TAC	TAC	Y	Y	Yes	Maltose/maltodextrin ABC transporter, permease protein MalF	104358	105650	-1
105289	AAT	ACT	N	T	No	Maltose/maltodextrin ABC transporter, permease protein MalF	104358	105650	-1
105400	GTG	GGG	V	G	No	Maltose/maltodextrin ABC transporter, permease protein MalF	104358	105650	-1
105508	GCG	GAG	A	E	No	Maltose/maltodextrin ABC transporter, permease protein MalF	104358	105650	-1
105511	GCT	GAT	A	D	No	Maltose/maltodextrin ABC transporter, permease protein MalF	104358	105650	-1
105676	C	T				Intergenic region
105694	A	T				Intergenic region
105697	G	T				Intergenic region
105730	T	G				Intergenic region
105808	GCT	GCT	A	A	Yes	Maltose/maltodextrin ABC transporter, substrate binding periplasmic protein MalE	105763	107034	-1
105838	AAA	AAA	K	K	Yes	Maltose/maltodextrin ABC transporter, substrate binding periplasmic protein MalE	105763	107034	-1
105907	CCA	CCT	P	P	Yes	Maltose/maltodextrin ABC transporter, substrate binding periplasmic protein MalE	105763	107034	-1
106039	GAA	GAG	E	E	Yes	Maltose/maltodextrin ABC transporter, substrate binding periplasmic protein MalE	105763	107034	-1
106247	GAA	GCA	E	A	No	Maltose/maltodextrin ABC transporter, substrate binding periplasmic protein MalE	105763	107034	-1
106253	TTC	TGC	F	C	No	Maltose/maltodextrin ABC transporter, substrate binding periplasmic protein MalE	105763	107034	-1
106268	TTG	TAG	L	*	No	Maltose/maltodextrin ABC transporter, substrate binding periplasmic protein MalE	105763	107034	-1
106271	AAC	AAC	N	N	Yes	Maltose/maltodextrin ABC transporter, substrate binding periplasmic protein MalE	105763	107034	-1
106290	GAT	TAT	D	Y	No	Maltose/maltodextrin ABC transporter, substrate binding periplasmic protein MalE	105763	107034	-1
106301	AAA	AGA	K	R	No	Maltose/maltodextrin ABC transporter, substrate binding periplasmic protein MalE	105763	107034	-1
106307	TGG	TAG	W	*	No	Maltose/maltodextrin ABC transporter, substrate binding periplasmic protein MalE	105763	107034	-1
106514	AAA	AAA	K	K	Yes	Maltose/maltodextrin ABC transporter, substrate binding periplasmic protein MalE	105763	107034	-1
106610	GGT	GTT	G	V	No	Maltose/maltodextrin ABC transporter, substrate binding periplasmic protein MalE	105763	107034	-1
106616	GTT	GGT	V	G	No	Maltose/maltodextrin ABC transporter, substrate binding periplasmic protein MalE	105763	107034	-1
106622	GGT	GAT	G	D	No	Maltose/maltodextrin ABC transporter, substrate binding periplasmic protein MalE	105763	107034	-1
106754	GCT	GGT	A	G	No	Maltose/maltodextrin ABC transporter, substrate binding periplasmic protein MalE	105763	107034	-1
106962	TGC	GGC	C	G	No	Maltose/maltodextrin ABC transporter, substrate binding periplasmic protein MalE	105763	107034	-1
107315	C	T				Intergenic region
107319	A	G				Intergenic region
107369	C	G				Intergenic region
107408	A	G				Intergenic region
107439	G	A				Intergenic region
107480	A	G				Intergenic region
107481	G	C				Intergenic region
107549	CTA	CGA	L	R	No	4-alpha-glucanotransferase (amylomaltase) (EC 2.4.1.25)	107506	109023	1
107559	GCA	GCG	A	A	Yes	4-alpha-glucanotransferase (amylomaltase) (EC 2.4.1.25)	107506	109023	1
107567	ATT	ATT	I	I	Yes	4-alpha-glucanotransferase (amylomaltase) (EC 2.4.1.25)	107506	109023	1
107576	TTT	TTT	F	F	Yes	4-alpha-glucanotransferase (amylomaltase) (EC 2.4.1.25)	107506	109023	1
107585	ACT	AAT	T	N	No	4-alpha-glucanotransferase (amylomaltase) (EC 2.4.1.25)	107506	109023	1
107588	GCC	GTC	A	V	No	4-alpha-glucanotransferase (amylomaltase) (EC 2.4.1.25)	107506	109023	1
107606	TTC	TGC	F	C	No	4-alpha-glucanotransferase (amylomaltase) (EC 2.4.1.25)	107506	109023	1
107675	CCA	CAA	P	Q	No	4-alpha-glucanotransferase (amylomaltase) (EC 2.4.1.25)	107506	109023	1
107681	CAA	CGA	Q	R	No	4-alpha-glucanotransferase (amylomaltase) (EC 2.4.1.25)	107506	109023	1
107705	AAT	ATT	N	I	No	4-alpha-glucanotransferase (amylomaltase) (EC 2.4.1.25)	107506	109023	1
107714	TTT	TAT	F	Y	No	4-alpha-glucanotransferase (amylomaltase) (EC 2.4.1.25)	107506	109023	1
107765	CTT	CCT	L	P	No	4-alpha-glucanotransferase (amylomaltase) (EC 2.4.1.25)	107506	109023	1
107809	GCG	CCG	A	P	No	4-alpha-glucanotransferase (amylomaltase) (EC 2.4.1.25)	107506	109023	1
107828	CGT	CCT	R	P	No	4-alpha-glucanotransferase (amylomaltase) (EC 2.4.1.25)	107506	109023	1
107837	CTT	CAT	L	H	No	4-alpha-glucanotransferase (amylomaltase) (EC 2.4.1.25)	107506	109023	1
107855	AAA	ACA	K	T	No	4-alpha-glucanotransferase (amylomaltase) (EC 2.4.1.25)	107506	109023	1
107871	GTG	GTA	V	V	Yes	4-alpha-glucanotransferase (amylomaltase) (EC 2.4.1.25)	107506	109023	1
107903	CAA	CGA	Q	R	No	4-alpha-glucanotransferase (amylomaltase) (EC 2.4.1.25)	107506	109023	1
107948	ATT	ATT	I	I	Yes	4-alpha-glucanotransferase (amylomaltase) (EC 2.4.1.25)	107506	109023	1
107951	AAA	ATA	K	I	No	4-alpha-glucanotransferase (amylomaltase) (EC 2.4.1.25)	107506	109023	1
107957	CAT	CCT	H	P	No	4-alpha-glucanotransferase (amylomaltase) (EC 2.4.1.25)	107506	109023	1
107960	TTT	TGT	F	C	No	4-alpha-glucanotransferase (amylomaltase) (EC 2.4.1.25)	107506	109023	1
107968	CTT	TTT	L	F	No	4-alpha-glucanotransferase (amylomaltase) (EC 2.4.1.25)	107506	109023	1
107972	GCT	GTT	A	V	No	4-alpha-glucanotransferase (amylomaltase) (EC 2.4.1.25)	107506	109023	1
108032	TAC	TAC	Y	Y	Yes	4-alpha-glucanotransferase (amylomaltase) (EC 2.4.1.25)	107506	109023	1
108389	GAC	GTC	D	V	No	4-alpha-glucanotransferase (amylomaltase) (EC 2.4.1.25)	107506	109023	1
108395	TTC	TAC	F	Y	No	4-alpha-glucanotransferase (amylomaltase) (EC 2.4.1.25)	107506	109023	1
108404	TTC	TTC	F	F	Yes	4-alpha-glucanotransferase (amylomaltase) (EC 2.4.1.25)	107506	109023	1
108425	CCT	CCT	P	P	Yes	4-alpha-glucanotransferase (amylomaltase) (EC 2.4.1.25)	107506	109023	1
108461	GTG	GTG	V	V	Yes	4-alpha-glucanotransferase (amylomaltase) (EC 2.4.1.25)	107506	109023	1
108500	GAA	GAA	E	E	Yes	4-alpha-glucanotransferase (amylomaltase) (EC 2.4.1.25)	107506	109023	1
108503	GAG	GGG	E	G	No	4-alpha-glucanotransferase (amylomaltase) (EC 2.4.1.25)	107506	109023	1
108506	CTT	CGT	L	R	No	4-alpha-glucanotransferase (amylomaltase) (EC 2.4.1.25)	107506	109023	1
108560	ATC	ACC	I	T	No	4-alpha-glucanotransferase (amylomaltase) (EC 2.4.1.25)	107506	109023	1
108569	CGC	CGC	R	R	Yes	4-alpha-glucanotransferase (amylomaltase) (EC 2.4.1.25)	107506	109023	1
108658	GCT	TCT	A	S	No	4-alpha-glucanotransferase (amylomaltase) (EC 2.4.1.25)	107506	109023	1
108668	GTT	GAT	V	D	No	4-alpha-glucanotransferase (amylomaltase) (EC 2.4.1.25)	107506	109023	1
108713	TAC	TAC	Y	Y	Yes	4-alpha-glucanotransferase (amylomaltase) (EC 2.4.1.25)	107506	109023	1
108737	ACT	ATT	T	I	No	4-alpha-glucanotransferase (amylomaltase) (EC 2.4.1.25)	107506	109023	1
108755	CGT	CCT	R	P	No	4-alpha-glucanotransferase (amylomaltase) (EC 2.4.1.25)	107506	109023	1
108764	AAC	AAC	N	N	Yes	4-alpha-glucanotransferase (amylomaltase) (EC 2.4.1.25)	107506	109023	1
108767	CGT	CCT	R	P	No	4-alpha-glucanotransferase (amylomaltase) (EC 2.4.1.25)	107506	109023	1
108830	ATG	AAG	M	K	No	4-alpha-glucanotransferase (amylomaltase) (EC 2.4.1.25)	107506	109023	1
108848	CAA	CCA	Q	P	No	4-alpha-glucanotransferase (amylomaltase) (EC 2.4.1.25)	107506	109023	1
108851	GAC	GCC	D	A	No	4-alpha-glucanotransferase (amylomaltase) (EC 2.4.1.25)	107506	109023	1
108878	CGC	CAC	R	H	No	4-alpha-glucanotransferase (amylomaltase) (EC 2.4.1.25)	107506	109023	1
108911	TGG	TCG	W	S	No	4-alpha-glucanotransferase (amylomaltase) (EC 2.4.1.25)	107506	109023	1
108956	GAA	GCA	E	A	No	4-alpha-glucanotransferase (amylomaltase) (EC 2.4.1.25)	107506	109023	1
108967	GAC	GAC	D	D	Yes	4-alpha-glucanotransferase (amylomaltase) (EC 2.4.1.25)	107506	109023	1
108999	GAA	GAC	E	D	No	4-alpha-glucanotransferase (amylomaltase) (EC 2.4.1.25)	107506	109023	1
109000	AAT	CAA	N	Q	No	4-alpha-glucanotransferase (amylomaltase) (EC 2.4.1.25)	107506	109023	1
109001	G	A	Merged with SNP 109000
109002	C	A	Merged with SNP 109000
109050	TTA	TGA	L	*	No	Maltodextrin phosphorylase (EC 2.4.1.1)	109046	111304	1
109068	GTA	GGA	V	G	No	Maltodextrin phosphorylase (EC 2.4.1.1)	109046	111304	1
109095	GCA	GGA	A	G	No	Maltodextrin phosphorylase (EC 2.4.1.1)	109046	111304	1
109182	AAA	ACA	K	T	No	Maltodextrin phosphorylase (EC 2.4.1.1)	109046	111304	1
109203	GCT	GGT	A	G	No	Maltodextrin phosphorylase (EC 2.4.1.1)	109046	111304	1
109239	TTG	TGG	L	W	No	Maltodextrin phosphorylase (EC 2.4.1.1)	109046	111304	1
109245	AAC	ACC	N	T	No	Maltodextrin phosphorylase (EC 2.4.1.1)	109046	111304	1
109248	CTT	CGT	L	R	No	Maltodextrin phosphorylase (EC 2.4.1.1)	109046	111304	1
109281	GCA	GAA	A	E	No	Maltodextrin phosphorylase (EC 2.4.1.1)	109046	111304	1
109305	GAA	GAA	E	E	Yes	Maltodextrin phosphorylase (EC 2.4.1.1)	109046	111304	1
109308	GTC	GCC	V	A	No	Maltodextrin phosphorylase (EC 2.4.1.1)	109046	111304	1
109317	GTA	GGA	V	G	No	Maltodextrin phosphorylase (EC 2.4.1.1)	109046	111304	1
109320	GAA	GCA	E	A	No	Maltodextrin phosphorylase (EC 2.4.1.1)	109046	111304	1
109323	TTG	TTG	L	L	Yes	Maltodextrin phosphorylase (EC 2.4.1.1)	109046	111304	1
109329	CCA	CGA	P	R	No	Maltodextrin phosphorylase (EC 2.4.1.1)	109046	111304	1
109350	TTG	TGG	L	W	No	Maltodextrin phosphorylase (EC 2.4.1.1)	109046	111304	1
109374	ATC	ATC	I	I	Yes	Maltodextrin phosphorylase (EC 2.4.1.1)	109046	111304	1
109429	CAC	CAC	H	H	Yes	Maltodextrin phosphorylase (EC 2.4.1.1)	109046	111304	1
109443	CAA	CTA	Q	L	No	Maltodextrin phosphorylase (EC 2.4.1.1)	109046	111304	1
109455	AAA	AAA	K	K	Yes	Maltodextrin phosphorylase (EC 2.4.1.1)	109046	111304	1
109461	AAC	AGC	N	S	No	Maltodextrin phosphorylase (EC 2.4.1.1)	109046	111304	1
109536	GTG	GAG	V	E	No	Maltodextrin phosphorylase (EC 2.4.1.1)	109046	111304	1
109539	CCA	CGA	P	R	No	Maltodextrin phosphorylase (EC 2.4.1.1)	109046	111304	1
109542	TTC	TGC	F	C	No	Maltodextrin phosphorylase (EC 2.4.1.1)	109046	111304	1
109578	ATC	ATC	I	I	Yes	Maltodextrin phosphorylase (EC 2.4.1.1)	109046	111304	1
109596	AAG	AAG	K	K	Yes	Maltodextrin phosphorylase (EC 2.4.1.1)	109046	111304	1
109617	TTG	TGG	L	W	No	Maltodextrin phosphorylase (EC 2.4.1.1)	109046	111304	1
109737	CAA	CGA	Q	R	No	Maltodextrin phosphorylase (EC 2.4.1.1)	109046	111304	1
109767	TAC	TGC	Y	C	No	Maltodextrin phosphorylase (EC 2.4.1.1)	109046	111304	1
109815	GAA	GTA	E	V	No	Maltodextrin phosphorylase (EC 2.4.1.1)	109046	111304	1
109823	AGC	GGC	S	G	No	Maltodextrin phosphorylase (EC 2.4.1.1)	109046	111304	1
109842	GCG	GAG	A	E	No	Maltodextrin phosphorylase (EC 2.4.1.1)	109046	111304	1
109869	GAT	GCT	D	A	No	Maltodextrin phosphorylase (EC 2.4.1.1)	109046	111304	1
109935	GAT	GCT	D	A	No	Maltodextrin phosphorylase (EC 2.4.1.1)	109046	111304	1
109948	TCT	TCC	S	S	Yes	Maltodextrin phosphorylase (EC 2.4.1.1)	109046	111304	1
110026	TTG	TTA	L	L	Yes	Maltodextrin phosphorylase (EC 2.4.1.1)	109046	111304	1
110038	GTT	GTT	V	V	Yes	Maltodextrin phosphorylase (EC 2.4.1.1)	109046	111304	1
110047	TTG	TTA	L	L	Yes	Maltodextrin phosphorylase (EC 2.4.1.1)	109046	111304	1
110077	CGT	CGA	R	R	Yes	Maltodextrin phosphorylase (EC 2.4.1.1)	109046	111304	1
110122	GAA	GAA	E	E	Yes	Maltodextrin phosphorylase (EC 2.4.1.1)	109046	111304	1
110125	AAC	AAA	N	K	No	Maltodextrin phosphorylase (EC 2.4.1.1)	109046	111304	1
110137	CAC	CAA	H	Q	No	Maltodextrin phosphorylase (EC 2.4.1.1)	109046	111304	1
110176	AAC	AAG	N	K	No	Maltodextrin phosphorylase (EC 2.4.1.1)	109046	111304	1
110202	ATC	AAC	I	N	No	Maltodextrin phosphorylase (EC 2.4.1.1)	109046	111304	1
110203	ATC	ATT	I	I	Yes	Maltodextrin phosphorylase (EC 2.4.1.1)	109046	111304	1
110260	AAC	AAA	N	K	No	Maltodextrin phosphorylase (EC 2.4.1.1)	109046	111304	1
110374	GAA	GAG	E	E	Yes	Maltodextrin phosphorylase (EC 2.4.1.1)	109046	111304	1
110395	GAC	GAA	D	E	No	Maltodextrin phosphorylase (EC 2.4.1.1)	109046	111304	1
110396	AAA	CAA	K	Q	No	Maltodextrin phosphorylase (EC 2.4.1.1)	109046	111304	1
110452	TTG	TTT	L	F	No	Maltodextrin phosphorylase (EC 2.4.1.1)	109046	111304	1
110506	TTT	TTA	F	L	No	Maltodextrin phosphorylase (EC 2.4.1.1)	109046	111304	1
110509	GAT	GAG	D	E	No	Maltodextrin phosphorylase (EC 2.4.1.1)	109046	111304	1
110518	ATC	ATT	I	I	Yes	Maltodextrin phosphorylase (EC 2.4.1.1)	109046	111304	1
110521	AAA	AAT	K	N	No	Maltodextrin phosphorylase (EC 2.4.1.1)	109046	111304	1
110560	TTG	TTG	L	L	Yes	Maltodextrin phosphorylase (EC 2.4.1.1)	109046	111304	1
110575	AAA	AAC	K	N	No	Maltodextrin phosphorylase (EC 2.4.1.1)	109046	111304	1
110587	ATC	ATT	I	I	Yes	Maltodextrin phosphorylase (EC 2.4.1.1)	109046	111304	1
110596	GGT	GGC	G	G	Yes	Maltodextrin phosphorylase (EC 2.4.1.1)	109046	111304	1
110626	TTC	TTA	F	L	No	Maltodextrin phosphorylase (EC 2.4.1.1)	109046	111304	1
110668	GAC	GAG	D	E	No	Maltodextrin phosphorylase (EC 2.4.1.1)	109046	111304	1
110683	ATC	ATG	I	M	No	Maltodextrin phosphorylase (EC 2.4.1.1)	109046	111304	1
110704	ATT	ATG	I	M	No	Maltodextrin phosphorylase (EC 2.4.1.1)	109046	111304	1
110920	TTG	TTG	L	L	Yes	Maltodextrin phosphorylase (EC 2.4.1.1)	109046	111304	1
110968	GTT	GTT	V	V	Yes	Maltodextrin phosphorylase (EC 2.4.1.1)	109046	111304	1
110971	ATC	ATT	I	I	Yes	Maltodextrin phosphorylase (EC 2.4.1.1)	109046	111304	1
111025	GCT	GCA	A	A	Yes	Maltodextrin phosphorylase (EC 2.4.1.1)	109046	111304	1
111058	GAT	GAG	D	E	No	Maltodextrin phosphorylase (EC 2.4.1.1)	109046	111304	1
111070	GCA	GCA	A	A	Yes	Maltodextrin phosphorylase (EC 2.4.1.1)	109046	111304	1
111073	GTA	GTG	V	V	Yes	Maltodextrin phosphorylase (EC 2.4.1.1)	109046	111304	1
111079	AAG	AAG	K	K	Yes	Maltodextrin phosphorylase (EC 2.4.1.1)	109046	111304	1
111082	AAA	AAA	K	K	Yes	Maltodextrin phosphorylase (EC 2.4.1.1)	109046	111304	1
111097	CGT	CGC	R	R	Yes	Maltodextrin phosphorylase (EC 2.4.1.1)	109046	111304	1
111099	CTT	CAT	L	H	No	Maltodextrin phosphorylase (EC 2.4.1.1)	109046	111304	1
111196	GAC	GAC	D	D	Yes	Maltodextrin phosphorylase (EC 2.4.1.1)	109046	111304	1
111199	CGT	CGC	R	R	Yes	Maltodextrin phosphorylase (EC 2.4.1.1)	109046	111304	1
111262	CGT	CGG	R	R	Yes	Maltodextrin phosphorylase (EC 2.4.1.1)	109046	111304	1
111271	GCT	GCG	A	A	Yes	Maltodextrin phosphorylase (EC 2.4.1.1)	109046	111304	1
111388	A	G				Intergenic region
111397	C	A				Intergenic region
111403	T	C				Intergenic region
111405	C	T				Intergenic region
111408	G	A				Intergenic region
111418	A	G				Intergenic region
111484	G	C				Intergenic region
111490	A	G				Intergenic region
111499	T	C				Intergenic region
111502	G	A				Intergenic region
111505	A	G				Intergenic region
111511	G	A				Intergenic region
111529	A	G				Intergenic region
111613	A	C				Intergenic region
111615	G	A				Intergenic region
111646	G	A				Intergenic region
111649	C	A				Intergenic region
111652	T	C				Intergenic region
111664	G	A				Intergenic region
111847	C	A				Intergenic region
111926	CAA	CAA	Q	Q	Yes	Ribosomal RNA large subunit methyltransferase A (EC 2.1.1.51)	111853	112701	-1
111928	GAC	GGA	D	G	No	Ribosomal RNA large subunit methyltransferase A (EC 2.1.1.51)	111853	112701	-1
111929	A	C	Merged with SNP 111928
111968	CAA	CGA	Q	R	No	Ribosomal RNA large subunit methyltransferase A (EC 2.1.1.51)	111853	112701	-1
111989	CCT	CCT	P	P	Yes	Ribosomal RNA large subunit methyltransferase A (EC 2.1.1.51)	111853	112701	-1
112150	GGT	GGC	G	G	Yes	Ribosomal RNA large subunit methyltransferase A (EC 2.1.1.51)	111853	112701	-1
112153	GAC	GAC	D	D	Yes	Ribosomal RNA large subunit methyltransferase A (EC 2.1.1.51)	111853	112701	-1
112186	AAC	AAA	N	K	No	Ribosomal RNA large subunit methyltransferase A (EC 2.1.1.51)	111853	112701	-1
112195	TCG	TCG	S	S	Yes	Ribosomal RNA large subunit methyltransferase A (EC 2.1.1.51)	111853	112701	-1
112233	AAA	GAA	K	E	No	Ribosomal RNA large subunit methyltransferase A (EC 2.1.1.51)	111853	112701	-1
112345	GAC	GAT	D	D	Yes	Ribosomal RNA large subunit methyltransferase A (EC 2.1.1.51)	111853	112701	-1
112468	TTT	TTT	F	F	Yes	Ribosomal RNA large subunit methyltransferase A (EC 2.1.1.51)	111853	112701	-1
112591	AGC	AGG	S	R	No	Ribosomal RNA large subunit methyltransferase A (EC 2.1.1.51)	111853	112701	-1
112594	TGT	TCT	C	S	No	Ribosomal RNA large subunit methyltransferase A (EC 2.1.1.51)	111853	112701	-1
112595	A	G	Merged with SNP 112594
112599	AAG	AAG	K	K	Yes	Ribosomal RNA large subunit methyltransferase A (EC 2.1.1.51)	111853	112701	-1
112603	AGC	AGC	S	S	Yes	Ribosomal RNA large subunit methyltransferase A (EC 2.1.1.51)	111853	112701	-1
112609	GAG	GAG	E	E	Yes	Ribosomal RNA large subunit methyltransferase A (EC 2.1.1.51)	111853	112701	-1
112624	AAT	AAG	N	K	No	Ribosomal RNA large subunit methyltransferase A (EC 2.1.1.51)	111853	112701	-1
112648	TTT	TTA	F	L	No	Ribosomal RNA large subunit methyltransferase A (EC 2.1.1.51)	111853	112701	-1
112655	ACT	ATT	T	I	No	Ribosomal RNA large subunit methyltransferase A (EC 2.1.1.51)	111853	112701	-1
112665	GCT	ACT	A	T	No	Ribosomal RNA large subunit methyltransferase A (EC 2.1.1.51)	111853	112701	-1
112682	CCC	CAC	P	H	No	Ribosomal RNA large subunit methyltransferase A (EC 2.1.1.51)	111853	112701	-1
112693	ACA	ACC	T	T	Yes	Ribosomal RNA large subunit methyltransferase A (EC 2.1.1.51)	111853	112701	-1
112878	GCA	GTA	A	V	No	FIG01114477: hypothetical protein	112853	113131	1
112921	GCA	GCC	A	A	Yes	FIG01114477: hypothetical protein	112853	113131	1
112927	GGT	GGT	G	G	Yes	FIG01114477: hypothetical protein	112853	113131	1
112957	AAG	AAA	K	K	Yes	FIG01114477: hypothetical protein	112853	113131	1
112970	GGT	CGT	G	R	No	FIG01114477: hypothetical protein	112853	113131	1
113099	GAA	GAA	E	E	Yes	FIG01114477: hypothetical protein	112853	113131	1
113351	GAT	GAA	D	E	No	Copper-translocating P-type ATPase (EC 3.6.3.4)	113133	115193	1
113357	GGG	GGA	G	G	Yes	Copper-translocating P-type ATPase (EC 3.6.3.4)	113133	115193	1
113380	CTT	CAT	L	H	No	Copper-translocating P-type ATPase (EC 3.6.3.4)	113133	115193	1
113408	TAT	TAC	Y	Y	Yes	Copper-translocating P-type ATPase (EC 3.6.3.4)	113133	115193	1
113922	GTA	CTA	V	L	No	Copper-translocating P-type ATPase (EC 3.6.3.4)	113133	115193	1
114022	AAG	ACG	K	T	No	Copper-translocating P-type ATPase (EC 3.6.3.4)	113133	115193	1
114433	GAG	GTG	E	V	No	Copper-translocating P-type ATPase (EC 3.6.3.4)	113133	115193	1
114445	ATT	AAT	I	N	No	Copper-translocating P-type ATPase (EC 3.6.3.4)	113133	115193	1
114450	CAT	TAT	H	Y	No	Copper-translocating P-type ATPase (EC 3.6.3.4)	113133	115193	1
114480	ATT	GTT	I	V	No	Copper-translocating P-type ATPase (EC 3.6.3.4)	113133	115193	1
114551	CAG	CAG	Q	Q	Yes	Copper-translocating P-type ATPase (EC 3.6.3.4)	113133	115193	1
114588	TTA	TTA	L	L	Yes	Copper-translocating P-type ATPase (EC 3.6.3.4)	113133	115193	1
114597	GAG	AAG	E	K	No	Copper-translocating P-type ATPase (EC 3.6.3.4)	113133	115193	1
114668	CAT	CAC	H	H	Yes	Copper-translocating P-type ATPase (EC 3.6.3.4)	113133	115193	1
114687	GCA	CCA	A	P	No	Copper-translocating P-type ATPase (EC 3.6.3.4)	113133	115193	1
114702	GAG	AAG	E	K	No	Copper-translocating P-type ATPase (EC 3.6.3.4)	113133	115193	1
114744	GGG	AGG	G	R	No	Copper-translocating P-type ATPase (EC 3.6.3.4)	113133	115193	1
114750	ACC	CCC	T	P	No	Copper-translocating P-type ATPase (EC 3.6.3.4)	113133	115193	1
114768	GAA	CAA	E	Q	No	Copper-translocating P-type ATPase (EC 3.6.3.4)	113133	115193	1
114819	GAT	AAT	D	N	No	Copper-translocating P-type ATPase (EC 3.6.3.4)	113133	115193	1
114829	TTT	TCT	F	S	No	Copper-translocating P-type ATPase (EC 3.6.3.4)	113133	115193	1
114852	AAA	AAA	K	K	Yes	Copper-translocating P-type ATPase (EC 3.6.3.4)	113133	115193	1
114861	CAC	AAC	H	N	No	Copper-translocating P-type ATPase (EC 3.6.3.4)	113133	115193	1
114864	ACG	GCG	T	A	No	Copper-translocating P-type ATPase (EC 3.6.3.4)	113133	115193	1
114881	GGA	GGC	G	G	Yes	Copper-translocating P-type ATPase (EC 3.6.3.4)	113133	115193	1
114882	GAT	CAT	D	H	No	Copper-translocating P-type ATPase (EC 3.6.3.4)	113133	115193	1
114900	GCG	ACG	A	T	No	Copper-translocating P-type ATPase (EC 3.6.3.4)	113133	115193	1
114927	GTG	GTG	V	V	Yes	Copper-translocating P-type ATPase (EC 3.6.3.4)	113133	115193	1
114933	ATG	TTG	M	L	No	Copper-translocating P-type ATPase (EC 3.6.3.4)	113133	115193	1
114966	AGC	AGC	S	S	Yes	Copper-translocating P-type ATPase (EC 3.6.3.4)	113133	115193	1
114975	TTA	ATA	L	I	No	Copper-translocating P-type ATPase (EC 3.6.3.4)	113133	115193	1
115002	TTC	CTC	F	L	No	Copper-translocating P-type ATPase (EC 3.6.3.4)	113133	115193	1
115008	GAG	GAG	E	E	Yes	Copper-translocating P-type ATPase (EC 3.6.3.4)	113133	115193	1
115020	CTA	ATA	L	I	No	Copper-translocating P-type ATPase (EC 3.6.3.4)	113133	115193	1
115056	ATT	ATT	I	I	Yes	Copper-translocating P-type ATPase (EC 3.6.3.4)	113133	115193	1
115068	GTT	GTT	V	V	Yes	Copper-translocating P-type ATPase (EC 3.6.3.4)	113133	115193	1
115125	AAC	GAC	N	D	No	Copper-translocating P-type ATPase (EC 3.6.3.4)	113133	115193	1
115128	CTC	GTC	L	V	No	Copper-translocating P-type ATPase (EC 3.6.3.4)	113133	115193	1
115137	CTA	ATA	L	I	No	Copper-translocating P-type ATPase (EC 3.6.3.4)	113133	115193	1
115142	CAT	CAC	H	H	Yes	Copper-translocating P-type ATPase (EC 3.6.3.4)	113133	115193	1
115152	ACC	CCC	T	P	No	Copper-translocating P-type ATPase (EC 3.6.3.4)	113133	115193	1
115164	GTC	ATC	V	I	No	Copper-translocating P-type ATPase (EC 3.6.3.4)	113133	115193	1
115194	C	T				Intergenic region
115203	A	T				Intergenic region
115271	TAA	TAT	*	Y	No	Tyrosyl-tRNA synthetase (EC 6.1.1.1) ## cluster 1	115271	116527	-1
115284	GTG	GGG	V	G	No	Tyrosyl-tRNA synthetase (EC 6.1.1.1) ## cluster 1	115271	116527	-1
115290	TAC	TAC	Y	Y	Yes	Tyrosyl-tRNA synthetase (EC 6.1.1.1) ## cluster 1	115271	116527	-1
115308	CGC	CAC	R	H	No	Tyrosyl-tRNA synthetase (EC 6.1.1.1) ## cluster 1	115271	116527	-1
115341	GCA	GGA	A	G	No	Tyrosyl-tRNA synthetase (EC 6.1.1.1) ## cluster 1	115271	116527	-1
115350	TTG	TTG	L	L	Yes	Tyrosyl-tRNA synthetase (EC 6.1.1.1) ## cluster 1	115271	116527	-1
115356	TAT	TGT	Y	C	No	Tyrosyl-tRNA synthetase (EC 6.1.1.1) ## cluster 1	115271	116527	-1
115362	CTT	CGT	L	R	No	Tyrosyl-tRNA synthetase (EC 6.1.1.1) ## cluster 1	115271	116527	-1
115394	GCC	GCT	A	A	Yes	Tyrosyl-tRNA synthetase (EC 6.1.1.1) ## cluster 1	115271	116527	-1
115404	CAA	CGA	Q	R	No	Tyrosyl-tRNA synthetase (EC 6.1.1.1) ## cluster 1	115271	116527	-1
115410	GAT	GTT	D	V	No	Tyrosyl-tRNA synthetase (EC 6.1.1.1) ## cluster 1	115271	116527	-1
115452	GTG	GCG	V	A	No	Tyrosyl-tRNA synthetase (EC 6.1.1.1) ## cluster 1	115271	116527	-1
115467	ATC	ACC	I	T	No	Tyrosyl-tRNA synthetase (EC 6.1.1.1) ## cluster 1	115271	116527	-1
115470	AAT	AGT	N	S	No	Tyrosyl-tRNA synthetase (EC 6.1.1.1) ## cluster 1	115271	116527	-1
115482	GAC	GTC	D	V	No	Tyrosyl-tRNA synthetase (EC 6.1.1.1) ## cluster 1	115271	116527	-1
115488	CAA	CAA	Q	Q	Yes	Tyrosyl-tRNA synthetase (EC 6.1.1.1) ## cluster 1	115271	116527	-1
115521	CAA	CTA	Q	L	No	Tyrosyl-tRNA synthetase (EC 6.1.1.1) ## cluster 1	115271	116527	-1
115524	AAA	ACA	K	T	No	Tyrosyl-tRNA synthetase (EC 6.1.1.1) ## cluster 1	115271	116527	-1
115533	AAA	ACA	K	T	No	Tyrosyl-tRNA synthetase (EC 6.1.1.1) ## cluster 1	115271	116527	-1
115611	CAC	CTC	H	L	No	Tyrosyl-tRNA synthetase (EC 6.1.1.1) ## cluster 1	115271	116527	-1
115623	GTG	GTG	V	V	Yes	Tyrosyl-tRNA synthetase (EC 6.1.1.1) ## cluster 1	115271	116527	-1
115626	GTC	GTC	V	V	Yes	Tyrosyl-tRNA synthetase (EC 6.1.1.1) ## cluster 1	115271	116527	-1
115644	AAA	ATA	K	I	No	Tyrosyl-tRNA synthetase (EC 6.1.1.1) ## cluster 1	115271	116527	-1
115647	CAG	CTG	Q	L	No	Tyrosyl-tRNA synthetase (EC 6.1.1.1) ## cluster 1	115271	116527	-1
115707	CTC	CTC	L	L	Yes	Tyrosyl-tRNA synthetase (EC 6.1.1.1) ## cluster 1	115271	116527	-1
115710	TCA	TGA	S	*	No	Tyrosyl-tRNA synthetase (EC 6.1.1.1) ## cluster 1	115271	116527	-1
115734	TTC	TAC	F	Y	No	Tyrosyl-tRNA synthetase (EC 6.1.1.1) ## cluster 1	115271	116527	-1
115764	ATG	ACG	M	T	No	Tyrosyl-tRNA synthetase (EC 6.1.1.1) ## cluster 1	115271	116527	-1
115845	AAG	ATG	K	M	No	Tyrosyl-tRNA synthetase (EC 6.1.1.1) ## cluster 1	115271	116527	-1
118485	GTA	GTG	V	V	Yes	Multimodular transpeptidase-transglycosylase (EC 2.4.1.129) (EC 3.4.-.-)	116668	119175	1
118536	ACC	ACT	T	T	Yes	Multimodular transpeptidase-transglycosylase (EC 2.4.1.129) (EC 3.4.-.-)	116668	119175	1
118560	GAT	GAG	D	E	No	Multimodular transpeptidase-transglycosylase (EC 2.4.1.129) (EC 3.4.-.-)	116668	119175	1
118578	ATT	ATA	I	I	Yes	Multimodular transpeptidase-transglycosylase (EC 2.4.1.129) (EC 3.4.-.-)	116668	119175	1
118623	CTC	CTC	L	L	Yes	Multimodular transpeptidase-transglycosylase (EC 2.4.1.129) (EC 3.4.-.-)	116668	119175	1
118632	GCT	GCT	A	A	Yes	Multimodular transpeptidase-transglycosylase (EC 2.4.1.129) (EC 3.4.-.-)	116668	119175	1
118730	GAC	GTC	D	V	No	Multimodular transpeptidase-transglycosylase (EC 2.4.1.129) (EC 3.4.-.-)	116668	119175	1
118826	ATA	AAA	I	K	No	Multimodular transpeptidase-transglycosylase (EC 2.4.1.129) (EC 3.4.-.-)	116668	119175	1
118854	GAT	GAG	D	E	No	Multimodular transpeptidase-transglycosylase (EC 2.4.1.129) (EC 3.4.-.-)	116668	119175	1
118861	GTG	CTG	V	L	No	Multimodular transpeptidase-transglycosylase (EC 2.4.1.129) (EC 3.4.-.-)	116668	119175	1
128367	GGC	GGC	G	G	Yes	Lipid A export ATP-binding/permease protein MsbA	127325	129091	1
128496	ATC	ATC	I	I	Yes	Lipid A export ATP-binding/permease protein MsbA	127325	129091	1
128550	GAT	GGT	D	G	No	Lipid A export ATP-binding/permease protein MsbA	127325	129091	1
128559	GAC	GGC	D	G	No	Lipid A export ATP-binding/permease protein MsbA	127325	129091	1
128574	GAC	GTC	D	V	No	Lipid A export ATP-binding/permease protein MsbA	127325	129091	1
128580	GAC	GTC	D	V	No	Lipid A export ATP-binding/permease protein MsbA	127325	129091	1
128637	ACA	AGA	T	R	No	Lipid A export ATP-binding/permease protein MsbA	127325	129091	1
128652	ATC	ACC	I	T	No	Lipid A export ATP-binding/permease protein MsbA	127325	129091	1
128664	GTG	GTG	V	V	Yes	Lipid A export ATP-binding/permease protein MsbA	127325	129091	1
128692	GAA	GAC	E	D	No	Lipid A export ATP-binding/permease protein MsbA	127325	129091	1
128778	ATC	ACC	I	T	No	Lipid A export ATP-binding/permease protein MsbA	127325	129091	1
128820	ACC	ACC	T	T	Yes	Lipid A export ATP-binding/permease protein MsbA	127325	129091	1
128850	TTA	TTA	L	L	Yes	Lipid A export ATP-binding/permease protein MsbA	127325	129091	1
128877	ACC	AAC	T	N	No	Lipid A export ATP-binding/permease protein MsbA	127325	129091	1
128900	CAT	AAT	H	N	No	Lipid A export ATP-binding/permease protein MsbA	127325	129091	1
128907	ATG	AAG	M	K	No	Lipid A export ATP-binding/permease protein MsbA	127325	129091	1
128935	AGT	AGT	S	S	Yes	Lipid A export ATP-binding/permease protein MsbA	127325	129091	1
128936	TTT	CTT	F	L	No	Lipid A export ATP-binding/permease protein MsbA	127325	129091	1
128943	ATT	AAT	I	N	No	Lipid A export ATP-binding/permease protein MsbA	127325	129091	1
128955	CTC	CGC	L	R	No	Lipid A export ATP-binding/permease protein MsbA	127325	129091	1
128958	AAG	AGG	K	R	No	Lipid A export ATP-binding/permease protein MsbA	127325	129091	1
128961	ACC	AAC	T	N	No	Lipid A export ATP-binding/permease protein MsbA	127325	129091	1
128969	AAT	GAT	N	D	No	Lipid A export ATP-binding/permease protein MsbA	127325	129091	1
129006	GTC	GGC	V	G	No	Lipid A export ATP-binding/permease protein MsbA	127325	129091	1
129039	AAG	ATG	K	M	No	Lipid A export ATP-binding/permease protein MsbA	127325	129091	1
129060	GAA	GTA	E	V	No	Lipid A export ATP-binding/permease protein MsbA	127325	129091	1
129093	A	G				Intergenic region
129216	A	G				Intergenic region
129243	GTT	CTT	V	L	No	Glutamine amidotransferase, class I	129231	129920	1
129252	GTT	ATT	V	I	No	Glutamine amidotransferase, class I	129231	129920	1
129318	TTT	GTT	F	V	No	Glutamine amidotransferase, class I	129231	129920	1
129321	GCA	CCA	A	P	No	Glutamine amidotransferase, class I	129231	129920	1
129324	GAG	TAG	E	*	No	Glutamine amidotransferase, class I	129231	129920	1
129332	ATT	ATA	I	I	Yes	Glutamine amidotransferase, class I	129231	129920	1
129342	GGT	GGT	G	G	Yes	Glutamine amidotransferase, class I	129231	129920	1
129387	CGC	GGC	R	G	No	Glutamine amidotransferase, class I	129231	129920	1
129420	TTG	CTG	L	L	Yes	Glutamine amidotransferase, class I	129231	129920	1
129482	GAT	GAA	D	E	No	Glutamine amidotransferase, class I	129231	129920	1
129504	GAG	GAG	E	E	Yes	Glutamine amidotransferase, class I	129231	129920	1
129519	CTC	CTC	L	L	Yes	Glutamine amidotransferase, class I	129231	129920	1
129533	GCG	GCA	A	A	Yes	Glutamine amidotransferase, class I	129231	129920	1
129584	GTC	GTG	V	V	Yes	Glutamine amidotransferase, class I	129231	129920	1
129638	GGC	GGT	G	G	Yes	Glutamine amidotransferase, class I	129231	129920	1
129704	GGC	GGG	G	G	Yes	Glutamine amidotransferase, class I	129231	129920	1
129794	CAG	CAC	Q	H	No	Glutamine amidotransferase, class I	129231	129920	1
129809	ATT	ATG	I	M	No	Glutamine amidotransferase, class I	129231	129920	1
129826	CAT	CCT	H	P	No	Glutamine amidotransferase, class I	129231	129920	1
129890	GAA	GAT	E	D	No	Glutamine amidotransferase, class I	129231	129920	1
130016	A	C				Intergenic region
130019	A	G				Intergenic region
130079	T	C				Intergenic region
130342	TCT	TTT	S	F	No	Glucose-6-phosphate isomerase (EC 5.3.1.9)	130089	131438	1
130368	GAC	GAC	D	D	Yes	Glucose-6-phosphate isomerase (EC 5.3.1.9)	130089	131438	1
130389	GCA	ACA	A	T	No	Glucose-6-phosphate isomerase (EC 5.3.1.9)	130089	131438	1
130447	TCA	TTA	S	L	No	Glucose-6-phosphate isomerase (EC 5.3.1.9)	130089	131438	1
130450	ATC	ATC	I	I	Yes	Glucose-6-phosphate isomerase (EC 5.3.1.9)	130089	131438	1
130491	GAC	TAC	D	Y	No	Glucose-6-phosphate isomerase (EC 5.3.1.9)	130089	131438	1
130524	TCA	TCA	S	S	Yes	Glucose-6-phosphate isomerase (EC 5.3.1.9)	130089	131438	1
130639	AAA	ATA	K	I	No	Glucose-6-phosphate isomerase (EC 5.3.1.9)	130089	131438	1
130663	GAT	GAT	D	D	Yes	Glucose-6-phosphate isomerase (EC 5.3.1.9)	130089	131438	1
130672	GGT	GGT	G	G	Yes	Glucose-6-phosphate isomerase (EC 5.3.1.9)	130089	131438	1
130759	GGT	GAT	G	D	No	Glucose-6-phosphate isomerase (EC 5.3.1.9)	130089	131438	1
130789	GCG	GGG	A	G	No	Glucose-6-phosphate isomerase (EC 5.3.1.9)	130089	131438	1
130825	CTT	CAT	L	H	No	Glucose-6-phosphate isomerase (EC 5.3.1.9)	130089	131438	1
130885	TAC	TAC	Y	Y	Yes	Glucose-6-phosphate isomerase (EC 5.3.1.9)	130089	131438	1
130909	TAC	TAC	Y	Y	Yes	Glucose-6-phosphate isomerase (EC 5.3.1.9)	130089	131438	1
130924	CAA	CAA	Q	Q	Yes	Glucose-6-phosphate isomerase (EC 5.3.1.9)	130089	131438	1
130930	TTC	TCC	F	S	No	Glucose-6-phosphate isomerase (EC 5.3.1.9)	130089	131438	1
130933	TCA	TAA	S	*	No	Glucose-6-phosphate isomerase (EC 5.3.1.9)	130089	131438	1
130939	TGG	TAG	W	*	No	Glucose-6-phosphate isomerase (EC 5.3.1.9)	130089	131438	1
130993	CCA	CCA	P	P	Yes	Glucose-6-phosphate isomerase (EC 5.3.1.9)	130089	131438	1
131022	CAC	CAC	H	H	Yes	Glucose-6-phosphate isomerase (EC 5.3.1.9)	130089	131438	1
131080	CGT	CGT	R	R	Yes	Glucose-6-phosphate isomerase (EC 5.3.1.9)	130089	131438	1
132814	GAA	GAA	E	E	Yes	Glutamyl-tRNA synthetase (EC 6.1.1.17) @ Glutamyl-tRNA(Gln) synthetase (EC 6.1.1.24)	131594	133054	1
132833	GAA	GAA	E	E	Yes	Glutamyl-tRNA synthetase (EC 6.1.1.17) @ Glutamyl-tRNA(Gln) synthetase (EC 6.1.1.24)	131594	133054	1
132850	GAG	GAT	E	D	No	Glutamyl-tRNA synthetase (EC 6.1.1.17) @ Glutamyl-tRNA(Gln) synthetase (EC 6.1.1.24)	131594	133054	1
132853	GAG	GAA	E	E	Yes	Glutamyl-tRNA synthetase (EC 6.1.1.17) @ Glutamyl-tRNA(Gln) synthetase (EC 6.1.1.24)	131594	133054	1
132880	CAA	CAT	Q	H	No	Glutamyl-tRNA synthetase (EC 6.1.1.17) @ Glutamyl-tRNA(Gln) synthetase (EC 6.1.1.24)	131594	133054	1
132923	CTA	TTA	L	L	Yes	Glutamyl-tRNA synthetase (EC 6.1.1.17) @ Glutamyl-tRNA(Gln) synthetase (EC 6.1.1.24)	131594	133054	1
132952	TCA	TCA	S	S	Yes	Glutamyl-tRNA synthetase (EC 6.1.1.17) @ Glutamyl-tRNA(Gln) synthetase (EC 6.1.1.24)	131594	133054	1
132976	TTA	TTG	L	L	Yes	Glutamyl-tRNA synthetase (EC 6.1.1.17) @ Glutamyl-tRNA(Gln) synthetase (EC 6.1.1.24)	131594	133054	1
132979	CCA	CCC	P	P	Yes	Glutamyl-tRNA synthetase (EC 6.1.1.17) @ Glutamyl-tRNA(Gln) synthetase (EC 6.1.1.24)	131594	133054	1
132994	TTG	TTC	L	F	No	Glutamyl-tRNA synthetase (EC 6.1.1.17) @ Glutamyl-tRNA(Gln) synthetase (EC 6.1.1.24)	131594	133054	1
133003	CGT	CGT	R	R	Yes	Glutamyl-tRNA synthetase (EC 6.1.1.17) @ Glutamyl-tRNA(Gln) synthetase (EC 6.1.1.24)	131594	133054	1
133024	ATT	ATG	I	M	No	Glutamyl-tRNA synthetase (EC 6.1.1.17) @ Glutamyl-tRNA(Gln) synthetase (EC 6.1.1.24)	131594	133054	1
133030	AAC	AAT	N	N	Yes	Glutamyl-tRNA synthetase (EC 6.1.1.17) @ Glutamyl-tRNA(Gln) synthetase (EC 6.1.1.24)	131594	133054	1
133036	CTG	CTC	L	L	Yes	Glutamyl-tRNA synthetase (EC 6.1.1.17) @ Glutamyl-tRNA(Gln) synthetase (EC 6.1.1.24)	131594	133054	1
133039	AAG	AAA	K	K	Yes	Glutamyl-tRNA synthetase (EC 6.1.1.17) @ Glutamyl-tRNA(Gln) synthetase (EC 6.1.1.24)	131594	133054	1
133096	G	A				Intergenic region
133320	T	C				Intergenic region
133416	A	G				Intergenic region
134025	A	G				Intergenic region
134070	AAG	AAA	K	K	Yes	FIG01115257: hypothetical protein	134029	135306	1
134083	CAC	AAT	H	N	No	FIG01115257: hypothetical protein	134029	135306	1
134085	C	T	Merged with SNP 134083
134117	TAT	TTT	Y	F	No	FIG01115257: hypothetical protein	134029	135306	1
134166	AAG	AAA	K	K	Yes	FIG01115257: hypothetical protein	134029	135306	1
134199	GGC	GGT	G	G	Yes	FIG01115257: hypothetical protein	134029	135306	1
134410	CGC	TGC	R	C	No	FIG01115257: hypothetical protein	134029	135306	1
134424	CCT	CCC	P	P	Yes	FIG01115257: hypothetical protein	134029	135306	1
134449	CCA	TCA	P	S	No	FIG01115257: hypothetical protein	134029	135306	1
134463	CCA	CCC	P	P	Yes	FIG01115257: hypothetical protein	134029	135306	1
134837	ATC	ACC	I	T	No	FIG01115257: hypothetical protein	134029	135306	1
134928	CAT	CAC	H	H	Yes	FIG01115257: hypothetical protein	134029	135306	1
134940	GAG	GAA	E	E	Yes	FIG01115257: hypothetical protein	134029	135306	1
135024	CCA	CCG	P	P	Yes	FIG01115257: hypothetical protein	134029	135306	1
135036	ACT	ACC	T	T	Yes	FIG01115257: hypothetical protein	134029	135306	1
135051	GCC	GCT	A	A	Yes	FIG01115257: hypothetical protein	134029	135306	1
135341	A	G				Intergenic region
135453	GGT	GGA	G	G	Yes	Threonine synthase (EC 4.2.3.1)	135382	136866	1
135472	CTG	TTG	L	L	Yes	Threonine synthase (EC 4.2.3.1)	135382	136866	1
135483	CCA	CCG	P	P	Yes	Threonine synthase (EC 4.2.3.1)	135382	136866	1
135487	ACT	TCT	T	S	No	Threonine synthase (EC 4.2.3.1)	135382	136866	1
135501	GTG	GTT	V	V	Yes	Threonine synthase (EC 4.2.3.1)	135382	136866	1
135516	GAA	GAC	E	D	No	Threonine synthase (EC 4.2.3.1)	135382	136866	1
135525	AAA	AAG	K	K	Yes	Threonine synthase (EC 4.2.3.1)	135382	136866	1
135567	GCC	GCA	A	A	Yes	Threonine synthase (EC 4.2.3.1)	135382	136866	1
135611	ACC	AAC	T	N	No	Threonine synthase (EC 4.2.3.1)	135382	136866	1
135678	TAT	TAC	Y	Y	Yes	Threonine synthase (EC 4.2.3.1)	135382	136866	1
135688	CTG	TTG	L	L	Yes	Threonine synthase (EC 4.2.3.1)	135382	136866	1
135708	ATC	ATT	I	I	Yes	Threonine synthase (EC 4.2.3.1)	135382	136866	1
135711	GCT	GCC	A	A	Yes	Threonine synthase (EC 4.2.3.1)	135382	136866	1
135720	GAC	GAT	D	D	Yes	Threonine synthase (EC 4.2.3.1)	135382	136866	1
135753	ACA	ACG	T	T	Yes	Threonine synthase (EC 4.2.3.1)	135382	136866	1
135837	GCG	GCA	A	A	Yes	Threonine synthase (EC 4.2.3.1)	135382	136866	1
135873	GTT	GTC	V	V	Yes	Threonine synthase (EC 4.2.3.1)	135382	136866	1
135882	CCG	CCA	P	P	Yes	Threonine synthase (EC 4.2.3.1)	135382	136866	1
135885	AAA	AAG	K	K	Yes	Threonine synthase (EC 4.2.3.1)	135382	136866	1
135894	GTT	GTC	V	V	Yes	Threonine synthase (EC 4.2.3.1)	135382	136866	1
135903	GTA	GTG	V	V	Yes	Threonine synthase (EC 4.2.3.1)	135382	136866	1
135978	GCA	GCG	A	A	Yes	Threonine synthase (EC 4.2.3.1)	135382	136866	1
135987	AAC	AAT	N	N	Yes	Threonine synthase (EC 4.2.3.1)	135382	136866	1
136011	GTG	GTA	V	V	Yes	Threonine synthase (EC 4.2.3.1)	135382	136866	1
136013	GAA	GCA	E	A	No	Threonine synthase (EC 4.2.3.1)	135382	136866	1
136014	GAA	GAT	E	D	No	Threonine synthase (EC 4.2.3.1)	135382	136866	1
136086	GTA	GTG	V	V	Yes	Threonine synthase (EC 4.2.3.1)	135382	136866	1
136098	GTT	GTC	V	V	Yes	Threonine synthase (EC 4.2.3.1)	135382	136866	1
136101	TAT	TAC	Y	Y	Yes	Threonine synthase (EC 4.2.3.1)	135382	136866	1
136113	GCC	GCT	A	A	Yes	Threonine synthase (EC 4.2.3.1)	135382	136866	1
136116	TAC	TAT	Y	Y	Yes	Threonine synthase (EC 4.2.3.1)	135382	136866	1
136146	GTG	GTA	V	V	Yes	Threonine synthase (EC 4.2.3.1)	135382	136866	1
136155	GAA	GAT	E	D	No	Threonine synthase (EC 4.2.3.1)	135382	136866	1
136164	AAT	AAC	N	N	Yes	Threonine synthase (EC 4.2.3.1)	135382	136866	1
136305	GAC	GAT	D	D	Yes	Threonine synthase (EC 4.2.3.1)	135382	136866	1
136323	AAA	AAG	K	K	Yes	Threonine synthase (EC 4.2.3.1)	135382	136866	1
136326	GTG	GTA	V	V	Yes	Threonine synthase (EC 4.2.3.1)	135382	136866	1
136335	AGT	AGC	S	S	Yes	Threonine synthase (EC 4.2.3.1)	135382	136866	1
136350	ATT	ATC	I	I	Yes	Threonine synthase (EC 4.2.3.1)	135382	136866	1
136351	CTG	TTG	L	L	Yes	Threonine synthase (EC 4.2.3.1)	135382	136866	1
136460	ACA	ATA	T	I	No	Threonine synthase (EC 4.2.3.1)	135382	136866	1
136563	ATC	ATT	I	I	Yes	Threonine synthase (EC 4.2.3.1)	135382	136866	1
136593	GCA	GCT	A	A	Yes	Threonine synthase (EC 4.2.3.1)	135382	136866	1
136609	AAA	CAA	K	Q	No	Threonine synthase (EC 4.2.3.1)	135382	136866	1
136623	GGG	GGC	G	G	Yes	Threonine synthase (EC 4.2.3.1)	135382	136866	1
136630	GCT	ACT	A	T	No	Threonine synthase (EC 4.2.3.1)	135382	136866	1
136662	CCA	CCT	P	P	Yes	Threonine synthase (EC 4.2.3.1)	135382	136866	1
136683	GCC	GCA	A	A	Yes	Threonine synthase (EC 4.2.3.1)	135382	136866	1
136704	AAC	AAA	N	K	No	Threonine synthase (EC 4.2.3.1)	135382	136866	1
136711	TTG	CTG	L	L	Yes	Threonine synthase (EC 4.2.3.1)	135382	136866	1
136716	ACT	ACA	T	T	Yes	Threonine synthase (EC 4.2.3.1)	135382	136866	1
136740	TTA	TTG	L	L	Yes	Threonine synthase (EC 4.2.3.1)	135382	136866	1
136797	CCA	CCG	P	P	Yes	Threonine synthase (EC 4.2.3.1)	135382	136866	1
136849	ACT	GCT	T	A	No	Threonine synthase (EC 4.2.3.1)	135382	136866	1
136875	A	G				Intergenic region
136876	A	C				Intergenic region
136998	CTT	CTC	L	L	Yes	Multi antimicrobial extrusion (MATE) family transporter	136927	138207	1
137004	GGC	GGA	G	G	Yes	Multi antimicrobial extrusion (MATE) family transporter	136927	138207	1
137013	GAT	GAC	D	D	Yes	Multi antimicrobial extrusion (MATE) family transporter	136927	138207	1
137016	AGT	AGC	S	S	Yes	Multi antimicrobial extrusion (MATE) family transporter	136927	138207	1
137028	GCT	GCC	A	A	Yes	Multi antimicrobial extrusion (MATE) family transporter	136927	138207	1
137040	TTA	TTG	L	L	Yes	Multi antimicrobial extrusion (MATE) family transporter	136927	138207	1
137121	ATC	ATT	I	I	Yes	Multi antimicrobial extrusion (MATE) family transporter	136927	138207	1
137148	GGA	GGG	G	G	Yes	Multi antimicrobial extrusion (MATE) family transporter	136927	138207	1
137155	AAT	GAT	N	D	No	Multi antimicrobial extrusion (MATE) family transporter	136927	138207	1
137216	GGG	GCG	G	A	No	Multi antimicrobial extrusion (MATE) family transporter	136927	138207	1
137217	GGG	GGA	G	G	Yes	Multi antimicrobial extrusion (MATE) family transporter	136927	138207	1
137235	TCA	TCG	S	S	Yes	Multi antimicrobial extrusion (MATE) family transporter	136927	138207	1
137265	CTT	CTC	L	L	Yes	Multi antimicrobial extrusion (MATE) family transporter	136927	138207	1
137271	GGA	GGC	G	G	Yes	Multi antimicrobial extrusion (MATE) family transporter	136927	138207	1
137282	GCT	GAT	A	D	No	Multi antimicrobial extrusion (MATE) family transporter	136927	138207	1
137289	GCT	GCC	A	A	Yes	Multi antimicrobial extrusion (MATE) family transporter	136927	138207	1
137301	GGG	GGA	G	G	Yes	Multi antimicrobial extrusion (MATE) family transporter	136927	138207	1
137319	GTG	GTA	V	V	Yes	Multi antimicrobial extrusion (MATE) family transporter	136927	138207	1
137322	GGT	GGC	G	G	Yes	Multi antimicrobial extrusion (MATE) family transporter	136927	138207	1
137352	ACC	ACG	T	T	Yes	Multi antimicrobial extrusion (MATE) family transporter	136927	138207	1
137394	CTA	CTG	L	L	Yes	Multi antimicrobial extrusion (MATE) family transporter	136927	138207	1
137406	GTG	GTT	V	V	Yes	Multi antimicrobial extrusion (MATE) family transporter	136927	138207	1
137434	CTT	ATT	L	I	No	Multi antimicrobial extrusion (MATE) family transporter	136927	138207	1
137535	TCG	TCA	S	S	Yes	Multi antimicrobial extrusion (MATE) family transporter	136927	138207	1
137601	TTA	TTG	L	L	Yes	Multi antimicrobial extrusion (MATE) family transporter	136927	138207	1
137631	CGG	CGA	R	R	Yes	Multi antimicrobial extrusion (MATE) family transporter	136927	138207	1
137643	GTA	GTC	V	V	Yes	Multi antimicrobial extrusion (MATE) family transporter	136927	138207	1
137646	GTG	GTC	V	V	Yes	Multi antimicrobial extrusion (MATE) family transporter	136927	138207	1
137727	TAC	TAT	Y	Y	Yes	Multi antimicrobial extrusion (MATE) family transporter	136927	138207	1
137757	ACG	ACA	T	T	Yes	Multi antimicrobial extrusion (MATE) family transporter	136927	138207	1
137765	CTG	CAG	L	Q	No	Multi antimicrobial extrusion (MATE) family transporter	136927	138207	1
137793	AAT	AAC	N	N	Yes	Multi antimicrobial extrusion (MATE) family transporter	136927	138207	1
137807	GCT	GAT	A	D	No	Multi antimicrobial extrusion (MATE) family transporter	136927	138207	1
137809	AGT	GGT	S	G	No	Multi antimicrobial extrusion (MATE) family transporter	136927	138207	1
137863	TTC	CTC	F	L	No	Multi antimicrobial extrusion (MATE) family transporter	136927	138207	1
137890	CTG	TTG	L	L	Yes	Multi antimicrobial extrusion (MATE) family transporter	136927	138207	1
137925	GTC	GTT	V	V	Yes	Multi antimicrobial extrusion (MATE) family transporter	136927	138207	1
137946	GCG	GCA	A	A	Yes	Multi antimicrobial extrusion (MATE) family transporter	136927	138207	1
137991	ATT	ATA	I	I	Yes	Multi antimicrobial extrusion (MATE) family transporter	136927	138207	1
138012	GGT	GGA	G	G	Yes	Multi antimicrobial extrusion (MATE) family transporter	136927	138207	1
138081	GCT	GCC	A	A	Yes	Multi antimicrobial extrusion (MATE) family transporter	136927	138207	1
138087	CTG	CTT	L	L	Yes	Multi antimicrobial extrusion (MATE) family transporter	136927	138207	1
138321	GAT	GAC	D	D	Yes	hydrolase, haloacid dehalogenase-like family	138211	138831	1
138905	G	A				Intergenic region
138907	T	A				Intergenic region
138946	C	T				Intergenic region
138989	G	A				Intergenic region
139014	ATC	ATT	I	I	Yes	Group B streptococcal surface immunogenic protein	138997	140208	1
139091	ACC	AGC	T	S	No	Group B streptococcal surface immunogenic protein	138997	140208	1
139113	GAC	GAT	D	D	Yes	Group B streptococcal surface immunogenic protein	138997	140208	1
139194	GTT	GTA	V	V	Yes	Group B streptococcal surface immunogenic protein	138997	140208	1
139230	ACC	ACT	T	T	Yes	Group B streptococcal surface immunogenic protein	138997	140208	1
139283	GCA	GAA	A	E	No	Group B streptococcal surface immunogenic protein	138997	140208	1
139311	CAG	CAA	Q	Q	Yes	Group B streptococcal surface immunogenic protein	138997	140208	1
139314	ACA	ACT	T	T	Yes	Group B streptococcal surface immunogenic protein	138997	140208	1
139323	GCA	GCG	A	A	Yes	Group B streptococcal surface immunogenic protein	138997	140208	1
139442	GCA	GTA	A	V	No	Group B streptococcal surface immunogenic protein	138997	140208	1
139451	AAT	ACT	N	T	No	Group B streptococcal surface immunogenic protein	138997	140208	1
139462	GCA	ACA	A	T	No	Group B streptococcal surface immunogenic protein	138997	140208	1
139478	AGT	AAT	S	N	No	Group B streptococcal surface immunogenic protein	138997	140208	1
139499	GGG	GCG	G	A	No	Group B streptococcal surface immunogenic protein	138997	140208	1
139635	ACC	ACT	T	T	Yes	Group B streptococcal surface immunogenic protein	138997	140208	1
139683	GCG	GCT	A	A	Yes	Group B streptococcal surface immunogenic protein	138997	140208	1
139686	CCG	CCA	P	P	Yes	Group B streptococcal surface immunogenic protein	138997	140208	1
139698	ACG	ACA	T	T	Yes	Group B streptococcal surface immunogenic protein	138997	140208	1
139812	ACA	ACG	T	T	Yes	Group B streptococcal surface immunogenic protein	138997	140208	1
139816	TCA	GCT	S	A	No	Group B streptococcal surface immunogenic protein	138997	140208	1
139818	A	T	Merged with SNP 139816
139827	GCA	GCG	A	A	Yes	Group B streptococcal surface immunogenic protein	138997	140208	1
139890	ACT	ACA	T	T	Yes	Group B streptococcal surface immunogenic protein	138997	140208	1
139893	GCA	GCG	A	A	Yes	Group B streptococcal surface immunogenic protein	138997	140208	1
139926	GGG	GGA	G	G	Yes	Group B streptococcal surface immunogenic protein	138997	140208	1
139935	TCC	TCT	S	S	Yes	Group B streptococcal surface immunogenic protein	138997	140208	1
139995	TTC	TTT	F	F	Yes	Group B streptococcal surface immunogenic protein	138997	140208	1
140022	GGT	GGA	G	G	Yes	Group B streptococcal surface immunogenic protein	138997	140208	1
140822	TTT	TTC	F	F	Yes	membrane protein	140387	141244	-1
140830	GTT	ATT	V	I	No	membrane protein	140387	141244	-1
140888	CTC	CTA	L	L	Yes	membrane protein	140387	141244	-1
140951	ACA	ACG	T	T	Yes	membrane protein	140387	141244	-1
141016	TTG	ATG	L	M	No	membrane protein	140387	141244	-1
141026	GTG	GTA	V	V	Yes	membrane protein	140387	141244	-1
141032	CCA	CCG	P	P	Yes	membrane protein	140387	141244	-1
141053	GTG	GTT	V	V	Yes	membrane protein	140387	141244	-1
141131	TTA	TTG	L	L	Yes	membrane protein	140387	141244	-1
141137	GTC	GTT	V	V	Yes	membrane protein	140387	141244	-1
141164	CTC	CTG	L	L	Yes	membrane protein	140387	141244	-1
141194	CAG	CAA	Q	Q	Yes	membrane protein	140387	141244	-1
141200	ACG	GCT	T	A	No	membrane protein	140387	141244	-1
141202	T	C	Merged with SNP 141200
141215	ACC	ACT	T	T	Yes	membrane protein	140387	141244	-1
141277	T	A				Intergenic region
141315	A	G				Intergenic region
141489	GCT	GCC	A	A	Yes	tRNA-guanine transglycosylase (EC 2.4.2.29)	141361	142503	1
141492	ACT	ACG	T	T	Yes	tRNA-guanine transglycosylase (EC 2.4.2.29)	141361	142503	1
141504	CAG	CAA	Q	Q	Yes	tRNA-guanine transglycosylase (EC 2.4.2.29)	141361	142503	1
141678	GCA	GCG	A	A	Yes	tRNA-guanine transglycosylase (EC 2.4.2.29)	141361	142503	1
141696	ACC	ACA	T	T	Yes	tRNA-guanine transglycosylase (EC 2.4.2.29)	141361	142503	1
141909	CCA	CCG	P	P	Yes	tRNA-guanine transglycosylase (EC 2.4.2.29)	141361	142503	1
141936	GTA	GTG	V	V	Yes	tRNA-guanine transglycosylase (EC 2.4.2.29)	141361	142503	1
142005	GGT	GGC	G	G	Yes	tRNA-guanine transglycosylase (EC 2.4.2.29)	141361	142503	1
142179	TTG	TTA	L	L	Yes	tRNA-guanine transglycosylase (EC 2.4.2.29)	141361	142503	1
142218	AGC	AGT	S	S	Yes	tRNA-guanine transglycosylase (EC 2.4.2.29)	141361	142503	1
142245	GCA	GCC	A	A	Yes	tRNA-guanine transglycosylase (EC 2.4.2.29)	141361	142503	1
142284	TGT	TGC	C	C	Yes	tRNA-guanine transglycosylase (EC 2.4.2.29)	141361	142503	1
142410	CAA	CAG	Q	Q	Yes	tRNA-guanine transglycosylase (EC 2.4.2.29)	141361	142503	1
142413	GTG	GTC	V	V	Yes	tRNA-guanine transglycosylase (EC 2.4.2.29)	141361	142503	1
142416	CGT	CGC	R	R	Yes	tRNA-guanine transglycosylase (EC 2.4.2.29)	141361	142503	1
142434	GAT	GAC	D	D	Yes	tRNA-guanine transglycosylase (EC 2.4.2.29)	141361	142503	1
142440	CTA	CTC	L	L	Yes	tRNA-guanine transglycosylase (EC 2.4.2.29)	141361	142503	1
142449	TTC	TTT	F	F	Yes	tRNA-guanine transglycosylase (EC 2.4.2.29)	141361	142503	1
142464	GTG	GTA	V	V	Yes	tRNA-guanine transglycosylase (EC 2.4.2.29)	141361	142503	1
142513	T	A				Intergenic region
142598	C	T				Intergenic region
142726	GGC	GGA	G	G	Yes	Acyltransferase family	142637	144454	1
142816	GAC	GAT	D	D	Yes	Acyltransferase family	142637	144454	1
142819	TTA	TTG	L	L	Yes	Acyltransferase family	142637	144454	1
143092	TTC	TTT	F	F	Yes	Acyltransferase family	142637	144454	1
143134	ATA	ATG	I	M	No	Acyltransferase family	142637	144454	1
143152	GCA	GCT	A	A	Yes	Acyltransferase family	142637	144454	1
143203	GCT	GCG	A	A	Yes	Acyltransferase family	142637	144454	1
143236	TTA	TTG	L	L	Yes	Acyltransferase family	142637	144454	1
143278	ACA	ACG	T	T	Yes	Acyltransferase family	142637	144454	1
143328	ATG	ACG	M	T	No	Acyltransferase family	142637	144454	1
143329	ATG	ATA	M	I	No	Acyltransferase family	142637	144454	1
143335	GAC	GAT	D	D	Yes	Acyltransferase family	142637	144454	1
143336	CTT	ATT	L	I	No	Acyltransferase family	142637	144454	1
143344	CAA	CAG	Q	Q	Yes	Acyltransferase family	142637	144454	1
143404	AAA	AAG	K	K	Yes	Acyltransferase family	142637	144454	1
143407	TTT	TTC	F	F	Yes	Acyltransferase family	142637	144454	1
143545	ACT	ACC	T	T	Yes	Acyltransferase family	142637	144454	1
143563	CTT	CTC	L	L	Yes	Acyltransferase family	142637	144454	1
143597	CTG	TTG	L	L	Yes	Acyltransferase family	142637	144454	1
143632	ATC	ATT	I	I	Yes	Acyltransferase family	142637	144454	1
143680	CCG	CCA	P	P	Yes	Acyltransferase family	142637	144454	1
143731	CCT	CCC	P	P	Yes	Acyltransferase family	142637	144454	1
143753	GGT	ACT	G	T	No	Acyltransferase family	142637	144454	1
143754	G	C	Merged with SNP 143753
143757	GCT	GGT	A	G	No	Acyltransferase family	142637	144454	1
143781	ACC	AGC	T	S	No	Acyltransferase family	142637	144454	1
143938	CTA	CTG	L	L	Yes	Acyltransferase family	142637	144454	1
143998	GCG	GCA	A	A	Yes	Acyltransferase family	142637	144454	1
144010	GCC	GCT	A	A	Yes	Acyltransferase family	142637	144454	1
144046	ATC	ATT	I	I	Yes	Acyltransferase family	142637	144454	1
144085	ACA	ACT	T	T	Yes	Acyltransferase family	142637	144454	1
144088	GTC	GTT	V	V	Yes	Acyltransferase family	142637	144454	1
144109	AAC	AAT	N	N	Yes	Acyltransferase family	142637	144454	1
144121	GGT	GGC	G	G	Yes	Acyltransferase family	142637	144454	1
144133	GAT	GAC	D	D	Yes	Acyltransferase family	142637	144454	1
144152	CAT	AAT	H	N	No	Acyltransferase family	142637	144454	1
144208	AGC	AGT	S	S	Yes	Acyltransferase family	142637	144454	1
144232	GAA	GAG	E	E	Yes	Acyltransferase family	142637	144454	1
144251	AGA	CGG	R	R	Yes	Acyltransferase family	142637	144454	1
144253	A	G	Merged with SNP 144251
144271	AAC	AAT	N	N	Yes	Acyltransferase family	142637	144454	1
144274	CCA	CCT	P	P	Yes	Acyltransferase family	142637	144454	1
144277	TAT	TAC	Y	Y	Yes	Acyltransferase family	142637	144454	1
144337	ACT	ACC	T	T	Yes	Acyltransferase family	142637	144454	1
144346	GTT	GTC	V	V	Yes	Acyltransferase family	142637	144454	1
144355	GGA	GGG	G	G	Yes	Acyltransferase family	142637	144454	1
144359	AAT	GAT	N	D	No	Acyltransferase family	142637	144454	1
144436	CTA	CTG	L	L	Yes	Acyltransferase family	142637	144454	1
144455	A	G				Intergenic region
144458	T	C				Intergenic region
144684	GGC	GGT	G	G	Yes	N-acetylglucosamine-6-phosphate deacetylase (EC 3.5.1.25)	144595	145746	1
144732	ACA	ACC	T	T	Yes	N-acetylglucosamine-6-phosphate deacetylase (EC 3.5.1.25)	144595	145746	1
144768	CAC	CAT	H	H	Yes	N-acetylglucosamine-6-phosphate deacetylase (EC 3.5.1.25)	144595	145746	1
144783	GGC	GGT	G	G	Yes	N-acetylglucosamine-6-phosphate deacetylase (EC 3.5.1.25)	144595	145746	1
144789	GTG	GTC	V	V	Yes	N-acetylglucosamine-6-phosphate deacetylase (EC 3.5.1.25)	144595	145746	1
144801	GAC	GAT	D	D	Yes	N-acetylglucosamine-6-phosphate deacetylase (EC 3.5.1.25)	144595	145746	1
144828	ACC	ACT	T	T	Yes	N-acetylglucosamine-6-phosphate deacetylase (EC 3.5.1.25)	144595	145746	1
144840	GGT	GGA	G	G	Yes	N-acetylglucosamine-6-phosphate deacetylase (EC 3.5.1.25)	144595	145746	1
144841	CTA	TTG	L	L	Yes	N-acetylglucosamine-6-phosphate deacetylase (EC 3.5.1.25)	144595	145746	1
144843	A	G	Merged with SNP 144841
144852	ACG	ACA	T	T	Yes	N-acetylglucosamine-6-phosphate deacetylase (EC 3.5.1.25)	144595	145746	1
144861	ACC	ACT	T	T	Yes	N-acetylglucosamine-6-phosphate deacetylase (EC 3.5.1.25)	144595	145746	1
144879	ACC	ACG	T	T	Yes	N-acetylglucosamine-6-phosphate deacetylase (EC 3.5.1.25)	144595	145746	1
144888	TCC	TCT	S	S	Yes	N-acetylglucosamine-6-phosphate deacetylase (EC 3.5.1.25)	144595	145746	1
144927	GGC	GGT	G	G	Yes	N-acetylglucosamine-6-phosphate deacetylase (EC 3.5.1.25)	144595	145746	1
144966	GGG	GGA	G	G	Yes	N-acetylglucosamine-6-phosphate deacetylase (EC 3.5.1.25)	144595	145746	1
144981	GGA	GGG	G	G	Yes	N-acetylglucosamine-6-phosphate deacetylase (EC 3.5.1.25)	144595	145746	1
145011	GCC	GCT	A	A	Yes	N-acetylglucosamine-6-phosphate deacetylase (EC 3.5.1.25)	144595	145746	1
145026	TAT	TAC	Y	Y	Yes	N-acetylglucosamine-6-phosphate deacetylase (EC 3.5.1.25)	144595	145746	1
145035	GAC	GAT	D	D	Yes	N-acetylglucosamine-6-phosphate deacetylase (EC 3.5.1.25)	144595	145746	1
145038	CCC	CCT	P	P	Yes	N-acetylglucosamine-6-phosphate deacetylase (EC 3.5.1.25)	144595	145746	1
145074	GCA	GCT	A	A	Yes	N-acetylglucosamine-6-phosphate deacetylase (EC 3.5.1.25)	144595	145746	1
145141	GTT	ATT	V	I	No	N-acetylglucosamine-6-phosphate deacetylase (EC 3.5.1.25)	144595	145746	1
145161	ACC	ACT	T	T	Yes	N-acetylglucosamine-6-phosphate deacetylase (EC 3.5.1.25)	144595	145746	1
145179	TCC	TCA	S	S	Yes	N-acetylglucosamine-6-phosphate deacetylase (EC 3.5.1.25)	144595	145746	1
145212	GTC	GTG	V	V	Yes	N-acetylglucosamine-6-phosphate deacetylase (EC 3.5.1.25)	144595	145746	1
145224	GCG	GCA	A	A	Yes	N-acetylglucosamine-6-phosphate deacetylase (EC 3.5.1.25)	144595	145746	1
145227	AGT	AGC	S	S	Yes	N-acetylglucosamine-6-phosphate deacetylase (EC 3.5.1.25)	144595	145746	1
145251	GGG	GGA	G	G	Yes	N-acetylglucosamine-6-phosphate deacetylase (EC 3.5.1.25)	144595	145746	1
145302	GAA	GAG	E	E	Yes	N-acetylglucosamine-6-phosphate deacetylase (EC 3.5.1.25)	144595	145746	1
145314	ACT	ACC	T	T	Yes	N-acetylglucosamine-6-phosphate deacetylase (EC 3.5.1.25)	144595	145746	1
145317	TAC	TAT	Y	Y	Yes	N-acetylglucosamine-6-phosphate deacetylase (EC 3.5.1.25)	144595	145746	1
145344	CAC	CAT	H	H	Yes	N-acetylglucosamine-6-phosphate deacetylase (EC 3.5.1.25)	144595	145746	1
145347	GTA	GTG	V	V	Yes	N-acetylglucosamine-6-phosphate deacetylase (EC 3.5.1.25)	144595	145746	1
145368	ATT	ATC	I	I	Yes	N-acetylglucosamine-6-phosphate deacetylase (EC 3.5.1.25)	144595	145746	1
145377	AAG	AAA	K	K	Yes	N-acetylglucosamine-6-phosphate deacetylase (EC 3.5.1.25)	144595	145746	1
145383	AAA	AAG	K	K	Yes	N-acetylglucosamine-6-phosphate deacetylase (EC 3.5.1.25)	144595	145746	1
145425	GCG	GCT	A	A	Yes	N-acetylglucosamine-6-phosphate deacetylase (EC 3.5.1.25)	144595	145746	1
145431	GGA	GGC	G	G	Yes	N-acetylglucosamine-6-phosphate deacetylase (EC 3.5.1.25)	144595	145746	1
145440	GAC	GAT	D	D	Yes	N-acetylglucosamine-6-phosphate deacetylase (EC 3.5.1.25)	144595	145746	1
145473	GTT	GTA	V	V	Yes	N-acetylglucosamine-6-phosphate deacetylase (EC 3.5.1.25)	144595	145746	1
145503	TCG	TCT	S	S	Yes	N-acetylglucosamine-6-phosphate deacetylase (EC 3.5.1.25)	144595	145746	1
145524	TCA	TCT	S	S	Yes	N-acetylglucosamine-6-phosphate deacetylase (EC 3.5.1.25)	144595	145746	1
145530	CTC	CTT	L	L	Yes	N-acetylglucosamine-6-phosphate deacetylase (EC 3.5.1.25)	144595	145746	1
145551	AAA	AAG	K	K	Yes	N-acetylglucosamine-6-phosphate deacetylase (EC 3.5.1.25)	144595	145746	1
145668	GAC	GAT	D	D	Yes	N-acetylglucosamine-6-phosphate deacetylase (EC 3.5.1.25)	144595	145746	1
145671	GCT	GCC	A	A	Yes	N-acetylglucosamine-6-phosphate deacetylase (EC 3.5.1.25)	144595	145746	1
145686	CTA	CTG	L	L	Yes	N-acetylglucosamine-6-phosphate deacetylase (EC 3.5.1.25)	144595	145746	1
145749	A	T				Intergenic region
145857	T	A				Intergenic region
146065	AAG	AAA	K	K	Yes	DNA binding protein, FIG046916	145901	146266	1
146089	ATC	ATT	I	I	Yes	DNA binding protein, FIG046916	145901	146266	1
146104	GCT	GCC	A	A	Yes	DNA binding protein, FIG046916	145901	146266	1
146107	GAT	GAC	D	D	Yes	DNA binding protein, FIG046916	145901	146266	1
146108	AAA	CAA	K	Q	No	DNA binding protein, FIG046916	145901	146266	1
146236	AAG	AAA	K	K	Yes	DNA binding protein, FIG046916	145901	146266	1
146239	CAT	CAC	H	H	Yes	DNA binding protein, FIG046916	145901	146266	1
146379	GCA	GAA	A	E	No	Late competence protein ComGA, access of DNA to ComEA	146336	147277	1
146425	TAT	TAC	Y	Y	Yes	Late competence protein ComGA, access of DNA to ComEA	146336	147277	1
146441	GTT	ATT	V	I	No	Late competence protein ComGA, access of DNA to ComEA	146336	147277	1
146451	GCG	GAG	A	E	No	Late competence protein ComGA, access of DNA to ComEA	146336	147277	1
146518	GTA	GTG	V	V	Yes	Late competence protein ComGA, access of DNA to ComEA	146336	147277	1
146530	AAT	AAC	N	N	Yes	Late competence protein ComGA, access of DNA to ComEA	146336	147277	1
146536	GGG	GGA	G	G	Yes	Late competence protein ComGA, access of DNA to ComEA	146336	147277	1
146554	CAG	CAA	Q	Q	Yes	Late competence protein ComGA, access of DNA to ComEA	146336	147277	1
146614	GTA	GTG	V	V	Yes	Late competence protein ComGA, access of DNA to ComEA	146336	147277	1
146662	GAC	GAT	D	D	Yes	Late competence protein ComGA, access of DNA to ComEA	146336	147277	1
146665	GAA	GAG	E	E	Yes	Late competence protein ComGA, access of DNA to ComEA	146336	147277	1
146701	AAT	AAC	N	N	Yes	Late competence protein ComGA, access of DNA to ComEA	146336	147277	1
146746	GCG	GCA	A	A	Yes	Late competence protein ComGA, access of DNA to ComEA	146336	147277	1
146755	GTT	GTC	V	V	Yes	Late competence protein ComGA, access of DNA to ComEA	146336	147277	1
146773	ACC	ACT	T	T	Yes	Late competence protein ComGA, access of DNA to ComEA	146336	147277	1
146774	TTG	CTG	L	L	Yes	Late competence protein ComGA, access of DNA to ComEA	146336	147277	1
146818	GTT	GTC	V	V	Yes	Late competence protein ComGA, access of DNA to ComEA	146336	147277	1
146827	ATC	ATT	I	I	Yes	Late competence protein ComGA, access of DNA to ComEA	146336	147277	1
146842	GAA	GAG	E	E	Yes	Late competence protein ComGA, access of DNA to ComEA	146336	147277	1
146890	GGC	GGT	G	G	Yes	Late competence protein ComGA, access of DNA to ComEA	146336	147277	1
146908	CTG	CTC	L	L	Yes	Late competence protein ComGA, access of DNA to ComEA	146336	147277	1
146935	CCG	CCT	P	P	Yes	Late competence protein ComGA, access of DNA to ComEA	146336	147277	1
146962	CGT	CGG	R	R	Yes	Late competence protein ComGA, access of DNA to ComEA	146336	147277	1
146965	GAC	GAT	D	D	Yes	Late competence protein ComGA, access of DNA to ComEA	146336	147277	1
146974	ACA	ACG	T	T	Yes	Late competence protein ComGA, access of DNA to ComEA	146336	147277	1
147034	GCT	GCC	A	A	Yes	Late competence protein ComGA, access of DNA to ComEA	146336	147277	1
147073	TTG	TTA	L	L	Yes	Late competence protein ComGA, access of DNA to ComEA	146336	147277	1
147076	GGG	GGT	G	G	Yes	Late competence protein ComGA, access of DNA to ComEA	146336	147277	1
147088	GAG	GAA	E	E	Yes	Late competence protein ComGA, access of DNA to ComEA	146336	147277	1
147171	TAT	TTT	Y	F	No	Late competence protein ComGA, access of DNA to ComEA	146336	147277	1
147190	ACC	ACT	T	T	Yes	Late competence protein ComGA, access of DNA to ComEA	146336	147277	1
147193	AGG	AGC	R	S	No	Late competence protein ComGA, access of DNA to ComEA	146336	147277	1
147201	GAA	GCA	E	A	No	Late competence protein ComGA, access of DNA to ComEA	146336	147277	1
147202	GAA	GAG	E	E	Yes	Late competence protein ComGA, access of DNA to ComEA	146336	147277	1
147250	GCC	GCT	A	A	Yes	Late competence protein ComGA, access of DNA to ComEA	146336	147277	1
147308	T	C				Intergenic region
147314	C	T				Intergenic region
147338	GAT	GAA	D	E	No	Late competence protein ComGB, access of DNA to ComEA	147333	148241	1
147473	CAG	CAA	Q	Q	Yes	Late competence protein ComGB, access of DNA to ComEA	147333	148241	1
147491	GTG	GTA	V	V	Yes	Late competence protein ComGB, access of DNA to ComEA	147333	148241	1
147497	GGA	GGG	G	G	Yes	Late competence protein ComGB, access of DNA to ComEA	147333	148241	1
147513	CTG	TTG	L	L	Yes	Late competence protein ComGB, access of DNA to ComEA	147333	148241	1
147701	ATA	ATT	I	I	Yes	Late competence protein ComGB, access of DNA to ComEA	147333	148241	1
147710	GGA	GGG	G	G	Yes	Late competence protein ComGB, access of DNA to ComEA	147333	148241	1
147737	TTG	TTA	L	L	Yes	Late competence protein ComGB, access of DNA to ComEA	147333	148241	1
147746	GCT	GCC	A	A	Yes	Late competence protein ComGB, access of DNA to ComEA	147333	148241	1
147782	GTC	GTT	V	V	Yes	Late competence protein ComGB, access of DNA to ComEA	147333	148241	1
147892	ATG	ACG	M	T	No	Late competence protein ComGB, access of DNA to ComEA	147333	148241	1
147920	CAA	CAG	Q	Q	Yes	Late competence protein ComGB, access of DNA to ComEA	147333	148241	1
147923	GGC	GGT	G	G	Yes	Late competence protein ComGB, access of DNA to ComEA	147333	148241	1
147926	TCA	TCT	S	S	Yes	Late competence protein ComGB, access of DNA to ComEA	147333	148241	1
147938	AAC	AAA	N	K	No	Late competence protein ComGB, access of DNA to ComEA	147333	148241	1
148124	GTC	GTT	V	V	Yes	Late competence protein ComGB, access of DNA to ComEA	147333	148241	1
148127	AAC	AAT	N	N	Yes	Late competence protein ComGB, access of DNA to ComEA	147333	148241	1
148130	CGC	CGT	R	R	Yes	Late competence protein ComGB, access of DNA to ComEA	147333	148241	1
148139	AAC	AAT	N	N	Yes	Late competence protein ComGB, access of DNA to ComEA	147333	148241	1
148140	TTA	CTG	L	L	Yes	Late competence protein ComGB, access of DNA to ComEA	147333	148241	1
148142	A	G	Merged with SNP 148140
148293	ACT	ACG	T	T	Yes	Late competence protein ComGC, access of DNA to ComEA, FIG007487	148243	148566	1
148308	TTA	TTG	L	L	Yes	Late competence protein ComGC, access of DNA to ComEA, FIG007487	148243	148566	1
148314	GTC	GTT	V	V	Yes	Late competence protein ComGC, access of DNA to ComEA, FIG007487	148243	148566	1
148320	CTC	CTT	L	L	Yes	Late competence protein ComGC, access of DNA to ComEA, FIG007487	148243	148566	1
148329	AGC	AGT	S	S	Yes	Late competence protein ComGC, access of DNA to ComEA, FIG007487	148243	148566	1
148416	GTG	GTA	V	V	Yes	Late competence protein ComGC, access of DNA to ComEA, FIG007487	148243	148566	1
148434	CTT	CTC	L	L	Yes	Late competence protein ComGC, access of DNA to ComEA, FIG007487	148243	148566	1
148500	GCT	GCA	A	A	Yes	Late competence protein ComGC, access of DNA to ComEA, FIG007487	148243	148566	1
148509	GCT	GCC	A	A	Yes	Late competence protein ComGC, access of DNA to ComEA, FIG007487	148243	148566	1
148518	TAC	TAT	Y	Y	Yes	Late competence protein ComGC, access of DNA to ComEA, FIG007487	148243	148566	1
148579	ATG	ATA	M	I	No	Late competence protein ComGD, access of DNA to ComEA, FIG038316	148529	148963	1
148582	CTT	CTG	L	L	Yes	Late competence protein ComGD, access of DNA to ComEA, FIG038316	148529	148963	1
148620	GCT	GGT	A	G	No	Late competence protein ComGD, access of DNA to ComEA, FIG038316	148529	148963	1
148624	TTG	TTA	L	L	Yes	Late competence protein ComGD, access of DNA to ComEA, FIG038316	148529	148963	1
148633	TCC	TCT	S	S	Yes	Late competence protein ComGD, access of DNA to ComEA, FIG038316	148529	148963	1
148636	GGT	GGC	G	G	Yes	Late competence protein ComGD, access of DNA to ComEA, FIG038316	148529	148963	1
148642	GTT	GTC	V	V	Yes	Late competence protein ComGD, access of DNA to ComEA, FIG038316	148529	148963	1
148657	GCG	GCA	A	A	Yes	Late competence protein ComGD, access of DNA to ComEA, FIG038316	148529	148963	1
148719	CAC	CGC	H	R	No	Late competence protein ComGD, access of DNA to ComEA, FIG038316	148529	148963	1
148726	GTT	GTA	V	V	Yes	Late competence protein ComGD, access of DNA to ComEA, FIG038316	148529	148963	1
148744	ACT	ACC	T	T	Yes	Late competence protein ComGD, access of DNA to ComEA, FIG038316	148529	148963	1
148750	CTA	CTG	L	L	Yes	Late competence protein ComGD, access of DNA to ComEA, FIG038316	148529	148963	1
148807	GGA	GGG	G	G	Yes	Late competence protein ComGD, access of DNA to ComEA, FIG038316	148529	148963	1
148817	TCA	CCA	S	P	No	Late competence protein ComGD, access of DNA to ComEA, FIG038316	148529	148963	1
148888	ACT	ACC	T	T	Yes	Late competence protein ComGD, access of DNA to ComEA, FIG038316	148529	148963	1
148954	ACT	ACA	T	T	Yes	Late competence protein ComGD, access of DNA to ComEA, FIG038316	148529	148963	1
149078	AAA	AAG	K	K	Yes	Late competence protein ComGE, FIG075573	148968	149228	1
149081	GAG	GAA	E	E	Yes	Late competence protein ComGE, FIG075573	148968	149228	1
149095	GCG	GTG	A	V	No	Late competence protein ComGE, FIG075573	148968	149228	1
149096	GCG	GCA	A	A	Yes	Late competence protein ComGE, FIG075573	148968	149228	1
149120	GGG	GGT	G	G	Yes	Late competence protein ComGE, FIG075573	148968	149228	1
149129	CAA	CAG	Q	Q	Yes	Late competence protein ComGE, FIG075573	148968	149228	1
149295	CTC	CTT	L	L	Yes	Late competence protein ComGF, access of DNA to ComEA, FIG012620	149191	149652	1
149301	CAG	CAA	Q	Q	Yes	Late competence protein ComGF, access of DNA to ComEA, FIG012620	149191	149652	1
149358	AAG	AAA	K	K	Yes	Late competence protein ComGF, access of DNA to ComEA, FIG012620	149191	149652	1
149382	CAG	CAA	Q	Q	Yes	Late competence protein ComGF, access of DNA to ComEA, FIG012620	149191	149652	1
149400	GAG	GAT	E	D	No	Late competence protein ComGF, access of DNA to ComEA, FIG012620	149191	149652	1
149426	GAC	GGC	D	G	No	Late competence protein ComGF, access of DNA to ComEA, FIG012620	149191	149652	1
149496	CGG	CGA	R	R	Yes	Late competence protein ComGF, access of DNA to ComEA, FIG012620	149191	149652	1
149659	GGC	GGT	G	G	Yes	Late competence protein ComGG, FIG068335	149630	150043	1
149665	CTC	CTT	L	L	Yes	Late competence protein ComGG, FIG068335	149630	150043	1
149683	ATG	ATT	M	I	No	Late competence protein ComGG, FIG068335	149630	150043	1
149750	GCC	ACC	A	T	No	Late competence protein ComGG, FIG068335	149630	150043	1
149860	CAC	CAA	H	Q	No	Late competence protein ComGG, FIG068335	149630	150043	1
149879	GCA	ACA	A	T	No	Late competence protein ComGG, FIG068335	149630	150043	1
149928	CAG	CCG	Q	P	No	Late competence protein ComGG, FIG068335	149630	150043	1
149937	ACC	ATC	T	I	No	Late competence protein ComGG, FIG068335	149630	150043	1
149949	AGA	AAA	R	K	No	Late competence protein ComGG, FIG068335	149630	150043	1
149953	ACA	ACG	T	T	Yes	Late competence protein ComGG, FIG068335	149630	150043	1
149955	GCT	GAT	A	D	No	Late competence protein ComGG, FIG068335	149630	150043	1
150020	TCT	CCT	S	P	No	Late competence protein ComGG, FIG068335	149630	150043	1
150037	AAA	AAT	K	N	No	Late competence protein ComGG, FIG068335	149630	150043	1
150270	GAT	GAC	D	D	Yes	S-adenosylmethionine-dependent methyltransferase	150076	150666	1
150721	G	A				Intergenic region
150904	GCA	GCG	A	A	Yes	Adenine-specific methyltransferase (EC 2.1.1.72)	150725	151678	1
150955	GCG	GCA	A	A	Yes	Adenine-specific methyltransferase (EC 2.1.1.72)	150725	151678	1
150967	GAG	GAA	E	E	Yes	Adenine-specific methyltransferase (EC 2.1.1.72)	150725	151678	1
150994	ACG	ACA	T	T	Yes	Adenine-specific methyltransferase (EC 2.1.1.72)	150725	151678	1
150997	CCG	CCA	P	P	Yes	Adenine-specific methyltransferase (EC 2.1.1.72)	150725	151678	1
151030	GTG	GTA	V	V	Yes	Adenine-specific methyltransferase (EC 2.1.1.72)	150725	151678	1
151042	CTG	CTT	L	L	Yes	Adenine-specific methyltransferase (EC 2.1.1.72)	150725	151678	1
151046	CAA	AAA	Q	K	No	Adenine-specific methyltransferase (EC 2.1.1.72)	150725	151678	1
151063	ATC	ATT	I	I	Yes	Adenine-specific methyltransferase (EC 2.1.1.72)	150725	151678	1
151117	CTT	CTC	L	L	Yes	Adenine-specific methyltransferase (EC 2.1.1.72)	150725	151678	1
151276	TTG	TTA	L	L	Yes	Adenine-specific methyltransferase (EC 2.1.1.72)	150725	151678	1
151282	GTA	GTT	V	V	Yes	Adenine-specific methyltransferase (EC 2.1.1.72)	150725	151678	1
151312	TCT	TCA	S	S	Yes	Adenine-specific methyltransferase (EC 2.1.1.72)	150725	151678	1
151376	TTC	CTC	F	L	No	Adenine-specific methyltransferase (EC 2.1.1.72)	150725	151678	1
151394	AAT	GAT	N	D	No	Adenine-specific methyltransferase (EC 2.1.1.72)	150725	151678	1
151438	AGC	AGT	S	S	Yes	Adenine-specific methyltransferase (EC 2.1.1.72)	150725	151678	1
151452	TCA	TTA	S	L	No	Adenine-specific methyltransferase (EC 2.1.1.72)	150725	151678	1
151591	GTC	GTT	V	V	Yes	Adenine-specific methyltransferase (EC 2.1.1.72)	150725	151678	1
151782	CTA	CTT	L	L	Yes	Acetate kinase (EC 2.7.2.1)	151729	152919	1
151785	TAC	TAT	Y	Y	Yes	Acetate kinase (EC 2.7.2.1)	151729	152919	1
151794	CCA	CCT	P	P	Yes	Acetate kinase (EC 2.7.2.1)	151729	152919	1
151802	ACT	AAT	T	N	No	Acetate kinase (EC 2.7.2.1)	151729	152919	1
151806	GTA	GTT	V	V	Yes	Acetate kinase (EC 2.7.2.1)	151729	152919	1
151812	GCG	GCT	A	A	Yes	Acetate kinase (EC 2.7.2.1)	151729	152919	1
151836	GGC	GGA	G	G	Yes	Acetate kinase (EC 2.7.2.1)	151729	152919	1
151857	ACA	ACT	T	T	Yes	Acetate kinase (EC 2.7.2.1)	151729	152919	1
151908	CAT	CAC	H	H	Yes	Acetate kinase (EC 2.7.2.1)	151729	152919	1
151932	TTA	TTG	L	L	Yes	Acetate kinase (EC 2.7.2.1)	151729	152919	1
151971	GAC	GAT	D	D	Yes	Acetate kinase (EC 2.7.2.1)	151729	152919	1
151974	GAA	GAG	E	E	Yes	Acetate kinase (EC 2.7.2.1)	151729	152919	1
152183	ACC	AGC	T	S	No	Acetate kinase (EC 2.7.2.1)	151729	152919	1
152288	GAA	GGA	E	G	No	Acetate kinase (EC 2.7.2.1)	151729	152919	1
152313	CGT	CGC	R	R	Yes	Acetate kinase (EC 2.7.2.1)	151729	152919	1
152325	GAT	GAC	D	D	Yes	Acetate kinase (EC 2.7.2.1)	151729	152919	1
152382	GGT	GGA	G	G	Yes	Acetate kinase (EC 2.7.2.1)	151729	152919	1
152502	TTC	TTT	F	F	Yes	Acetate kinase (EC 2.7.2.1)	151729	152919	1
152511	CCT	CCA	P	P	Yes	Acetate kinase (EC 2.7.2.1)	151729	152919	1
152565	GGC	GGT	G	G	Yes	Acetate kinase (EC 2.7.2.1)	151729	152919	1
152598	GCC	GCT	A	A	Yes	Acetate kinase (EC 2.7.2.1)	151729	152919	1
152622	GCA	GCG	A	A	Yes	Acetate kinase (EC 2.7.2.1)	151729	152919	1
152640	ATG	ATC	M	I	No	Acetate kinase (EC 2.7.2.1)	151729	152919	1
152670	GGC	GGT	G	G	Yes	Acetate kinase (EC 2.7.2.1)	151729	152919	1
152676	TAT	TAC	Y	Y	Yes	Acetate kinase (EC 2.7.2.1)	151729	152919	1
152736	GCT	GCA	A	A	Yes	Acetate kinase (EC 2.7.2.1)	151729	152919	1
152739	GCA	GCT	A	A	Yes	Acetate kinase (EC 2.7.2.1)	151729	152919	1
152741	AAC	ATC	N	I	No	Acetate kinase (EC 2.7.2.1)	151729	152919	1
152745	GTA	GTT	V	V	Yes	Acetate kinase (EC 2.7.2.1)	151729	152919	1
152751	GAA	GAG	E	E	Yes	Acetate kinase (EC 2.7.2.1)	151729	152919	1
152760	ATC	ATT	I	I	Yes	Acetate kinase (EC 2.7.2.1)	151729	152919	1
152814	GGT	GGC	G	G	Yes	Acetate kinase (EC 2.7.2.1)	151729	152919	1
152826	GAT	GAC	D	D	Yes	Acetate kinase (EC 2.7.2.1)	151729	152919	1
152838	GAT	GAC	D	D	Yes	Acetate kinase (EC 2.7.2.1)	151729	152919	1
152841	GCG	GCA	A	A	Yes	Acetate kinase (EC 2.7.2.1)	151729	152919	1
153451	CTG	TTG	L	L	Yes	Inner membrane protein translocase component YidC, short form OxaI-like	153409	154242	1
153540	GTC	GTT	V	V	Yes	Inner membrane protein translocase component YidC, short form OxaI-like	153409	154242	1
153579	GAT	GAC	D	D	Yes	Inner membrane protein translocase component YidC, short form OxaI-like	153409	154242	1
153603	ATT	ATC	I	I	Yes	Inner membrane protein translocase component YidC, short form OxaI-like	153409	154242	1
153631	TTA	CTA	L	L	Yes	Inner membrane protein translocase component YidC, short form OxaI-like	153409	154242	1
153636	TTG	TTA	L	L	Yes	Inner membrane protein translocase component YidC, short form OxaI-like	153409	154242	1
153690	CCG	CCA	P	P	Yes	Inner membrane protein translocase component YidC, short form OxaI-like	153409	154242	1
153786	GGA	GGG	G	G	Yes	Inner membrane protein translocase component YidC, short form OxaI-like	153409	154242	1
153813	CCA	CCG	P	P	Yes	Inner membrane protein translocase component YidC, short form OxaI-like	153409	154242	1
153831	CCG	CCT	P	P	Yes	Inner membrane protein translocase component YidC, short form OxaI-like	153409	154242	1
153843	GCG	GCA	A	A	Yes	Inner membrane protein translocase component YidC, short form OxaI-like	153409	154242	1
153846	CTC	CTT	L	L	Yes	Inner membrane protein translocase component YidC, short form OxaI-like	153409	154242	1
154128	TTT	TTC	F	F	Yes	Inner membrane protein translocase component YidC, short form OxaI-like	153409	154242	1
154155	GCT	GCC	A	A	Yes	Inner membrane protein translocase component YidC, short form OxaI-like	153409	154242	1
154254	G	A				Intergenic region
[truncated: 25,526 more rows]

## Sheet: Streptococcus GMD-2
SNP_position	Ref_codon	Sub_codon	aa_Ref	aa_Sub	Synonymous	Product	CDS_start	CDS_end	CDS_strand
24	C	T				Intergenic region
27	G	A				Intergenic region
60	ACT	ACC	T	T	Yes	Chromosomal replication initiator protein DnaA	43	651	1
111	CAT	CAC	H	H	Yes	Chromosomal replication initiator protein DnaA	43	651	1
141	CTG	CTA	L	L	Yes	Chromosomal replication initiator protein DnaA	43	651	1
147	TAT	TAC	Y	Y	Yes	Chromosomal replication initiator protein DnaA	43	651	1
156	GGT	GGC	G	G	Yes	Chromosomal replication initiator protein DnaA	43	651	1
372	GGA	GGG	G	G	Yes	Chromosomal replication initiator protein DnaA	43	651	1
402	GCG	GCA	A	A	Yes	Chromosomal replication initiator protein DnaA	43	651	1
420	TAC	TAT	Y	Y	Yes	Chromosomal replication initiator protein DnaA	43	651	1
471	TTC	TTT	F	F	Yes	Chromosomal replication initiator protein DnaA	43	651	1
474	GGA	GGT	G	G	Yes	Chromosomal replication initiator protein DnaA	43	651	1
480	AAA	AAG	K	K	Yes	Chromosomal replication initiator protein DnaA	43	651	1
495	GTT	GTG	V	V	Yes	Chromosomal replication initiator protein DnaA	43	651	1
530	GTA	GGA	V	G	No	Chromosomal replication initiator protein DnaA	43	651	1
749	GGT	GGG	G	G	Yes	GTP-binding and nucleic acid-binding protein YchF	615	1697	1
782	GAC	GAT	D	D	Yes	GTP-binding and nucleic acid-binding protein YchF	615	1697	1
797	GTA	GTT	V	V	Yes	GTP-binding and nucleic acid-binding protein YchF	615	1697	1
800	GTT	GTA	V	V	Yes	GTP-binding and nucleic acid-binding protein YchF	615	1697	1
824	GTG	GTT	V	V	Yes	GTP-binding and nucleic acid-binding protein YchF	615	1697	1
893	GAA	GAG	E	E	Yes	GTP-binding and nucleic acid-binding protein YchF	615	1697	1
971	AAA	AAG	K	K	Yes	GTP-binding and nucleic acid-binding protein YchF	615	1697	1
977	TCA	TCT	S	S	Yes	GTP-binding and nucleic acid-binding protein YchF	615	1697	1
980	GTA	GTG	V	V	Yes	GTP-binding and nucleic acid-binding protein YchF	615	1697	1
992	AAT	AAC	N	N	Yes	GTP-binding and nucleic acid-binding protein YchF	615	1697	1
1115	GAG	GAA	E	E	Yes	GTP-binding and nucleic acid-binding protein YchF	615	1697	1
1130	GCT	GCA	A	A	Yes	GTP-binding and nucleic acid-binding protein YchF	615	1697	1
1133	CGC	CGT	R	R	Yes	GTP-binding and nucleic acid-binding protein YchF	615	1697	1
1139	ATC	ATT	I	I	Yes	GTP-binding and nucleic acid-binding protein YchF	615	1697	1
1145	TTT	TTC	F	F	Yes	GTP-binding and nucleic acid-binding protein YchF	615	1697	1
1157	GAA	GAG	E	E	Yes	GTP-binding and nucleic acid-binding protein YchF	615	1697	1
1163	AAG	AAA	K	K	Yes	GTP-binding and nucleic acid-binding protein YchF	615	1697	1
1166	GTT	GTA	V	V	Yes	GTP-binding and nucleic acid-binding protein YchF	615	1697	1
1187	TTG	TTA	L	L	Yes	GTP-binding and nucleic acid-binding protein YchF	615	1697	1
1232	GTT	GTA	V	V	Yes	GTP-binding and nucleic acid-binding protein YchF	615	1697	1
1236	GGA	TCA	G	S	No	GTP-binding and nucleic acid-binding protein YchF	615	1697	1
1237	G	C	Merged with SNP 1236
1241	GAC	GAT	D	D	Yes	GTP-binding and nucleic acid-binding protein YchF	615	1697	1
1266	AAA	CAA	K	Q	No	GTP-binding and nucleic acid-binding protein YchF	615	1697	1
1280	TTT	TTC	F	F	Yes	GTP-binding and nucleic acid-binding protein YchF	615	1697	1
1298	GCT	GCA	A	A	Yes	GTP-binding and nucleic acid-binding protein YchF	615	1697	1
1301	GAA	GAG	E	E	Yes	GTP-binding and nucleic acid-binding protein YchF	615	1697	1
1307	GTC	GTA	V	V	Yes	GTP-binding and nucleic acid-binding protein YchF	615	1697	1
1316	TCC	TCT	S	S	Yes	GTP-binding and nucleic acid-binding protein YchF	615	1697	1
1349	GAC	GAT	D	D	Yes	GTP-binding and nucleic acid-binding protein YchF	615	1697	1
1355	GAG	GAA	E	E	Yes	GTP-binding and nucleic acid-binding protein YchF	615	1697	1
1400	GGC	GGT	G	G	Yes	GTP-binding and nucleic acid-binding protein YchF	615	1697	1
1516	GCA	GTA	A	V	No	GTP-binding and nucleic acid-binding protein YchF	615	1697	1
1550	GGG	GGC	G	G	Yes	GTP-binding and nucleic acid-binding protein YchF	615	1697	1
1625	GGG	GGA	G	G	Yes	GTP-binding and nucleic acid-binding protein YchF	615	1697	1
1701	T	C				Intergenic region
1776	ACC	ACT	T	T	Yes	Peptidyl-tRNA hydrolase (EC 3.1.1.29)	1771	2340	1
1788	GTA	GTT	V	V	Yes	Peptidyl-tRNA hydrolase (EC 3.1.1.29)	1771	2340	1
1794	TTG	TTA	L	L	Yes	Peptidyl-tRNA hydrolase (EC 3.1.1.29)	1771	2340	1
1821	GAA	GAG	E	E	Yes	Peptidyl-tRNA hydrolase (EC 3.1.1.29)	1771	2340	1
1878	GTC	GTT	V	V	Yes	Peptidyl-tRNA hydrolase (EC 3.1.1.29)	1771	2340	1
1950	CTC	CTG	L	L	Yes	Peptidyl-tRNA hydrolase (EC 3.1.1.29)	1771	2340	1
2052	GAT	GAC	D	D	Yes	Peptidyl-tRNA hydrolase (EC 3.1.1.29)	1771	2340	1
2067	GTT	GTC	V	V	Yes	Peptidyl-tRNA hydrolase (EC 3.1.1.29)	1771	2340	1
2094	GGG	GGA	G	G	Yes	Peptidyl-tRNA hydrolase (EC 3.1.1.29)	1771	2340	1
2100	GCT	GCG	A	A	Yes	Peptidyl-tRNA hydrolase (EC 3.1.1.29)	1771	2340	1
2139	ATA	ATT	I	I	Yes	Peptidyl-tRNA hydrolase (EC 3.1.1.29)	1771	2340	1
2142	GGT	GGA	G	G	Yes	Peptidyl-tRNA hydrolase (EC 3.1.1.29)	1771	2340	1
2148	CAG	CAA	Q	Q	Yes	Peptidyl-tRNA hydrolase (EC 3.1.1.29)	1771	2340	1
2149	ATA	GTA	I	V	No	Peptidyl-tRNA hydrolase (EC 3.1.1.29)	1771	2340	1
2199	TCC	TCG	S	S	Yes	Peptidyl-tRNA hydrolase (EC 3.1.1.29)	1771	2340	1
2206	CAT	AAT	H	N	No	Peptidyl-tRNA hydrolase (EC 3.1.1.29)	1771	2340	1
2229	GAT	GAA	D	E	No	Peptidyl-tRNA hydrolase (EC 3.1.1.29)	1771	2340	1
2259	TCC	TCT	S	S	Yes	Peptidyl-tRNA hydrolase (EC 3.1.1.29)	1771	2340	1
2334	AAC	AAT	N	N	Yes	Peptidyl-tRNA hydrolase (EC 3.1.1.29)	1771	2340	1
2337	GGC	GGT	G	G	Yes	Peptidyl-tRNA hydrolase (EC 3.1.1.29)	1771	2340	1
2376	GAC	GAT	D	D	Yes	Transcription-repair coupling factor	2341	5844	1
2455	ATT	CTT	I	L	No	Transcription-repair coupling factor	2341	5844	1
2472	AGT	AGC	S	S	Yes	Transcription-repair coupling factor	2341	5844	1
2577	CCA	CCT	P	P	Yes	Transcription-repair coupling factor	2341	5844	1
2586	GTT	GTC	V	V	Yes	Transcription-repair coupling factor	2341	5844	1
2592	GAC	GAT	D	D	Yes	Transcription-repair coupling factor	2341	5844	1
2649	GAG	GAA	E	E	Yes	Transcription-repair coupling factor	2341	5844	1
2666	AGT	AAT	S	N	No	Transcription-repair coupling factor	2341	5844	1
2673	CCG	CCA	P	P	Yes	Transcription-repair coupling factor	2341	5844	1
2686	ATT	GTT	I	V	No	Transcription-repair coupling factor	2341	5844	1
2703	ATC	ATT	I	I	Yes	Transcription-repair coupling factor	2341	5844	1
2769	GTT	GTC	V	V	Yes	Transcription-repair coupling factor	2341	5844	1
2772	GGC	GGT	G	G	Yes	Transcription-repair coupling factor	2341	5844	1
2804	CAG	CGG	Q	R	No	Transcription-repair coupling factor	2341	5844	1
2820	GGC	GGA	G	G	Yes	Transcription-repair coupling factor	2341	5844	1
2843	CGG	CAG	R	Q	No	Transcription-repair coupling factor	2341	5844	1
2874	GAT	GAC	D	D	Yes	Transcription-repair coupling factor	2341	5844	1
2994	ACC	ACA	T	T	Yes	Transcription-repair coupling factor	2341	5844	1
3120	GAG	GAT	E	D	No	Transcription-repair coupling factor	2341	5844	1
3190	GAA	AAA	E	K	No	Transcription-repair coupling factor	2341	5844	1
3193	ACA	GCA	T	A	No	Transcription-repair coupling factor	2341	5844	1
3274	TCC	GCC	S	A	No	Transcription-repair coupling factor	2341	5844	1
3336	TCT	TCC	S	S	Yes	Transcription-repair coupling factor	2341	5844	1
3338	GGG	GAG	G	E	No	Transcription-repair coupling factor	2341	5844	1
3402	TCC	TCT	S	S	Yes	Transcription-repair coupling factor	2341	5844	1
3426	AAT	AAC	N	N	Yes	Transcription-repair coupling factor	2341	5844	1
3429	CTT	CTC	L	L	Yes	Transcription-repair coupling factor	2341	5844	1
3465	CCC	CCA	P	P	Yes	Transcription-repair coupling factor	2341	5844	1
3529	AAC	GAC	N	D	No	Transcription-repair coupling factor	2341	5844	1
3541	ATT	GTT	I	V	No	Transcription-repair coupling factor	2341	5844	1
3573	AAG	AAA	K	K	Yes	Transcription-repair coupling factor	2341	5844	1
3576	ACG	ACA	T	T	Yes	Transcription-repair coupling factor	2341	5844	1
3582	GAA	GAG	E	E	Yes	Transcription-repair coupling factor	2341	5844	1
3620	AGA	AAA	R	K	No	Transcription-repair coupling factor	2341	5844	1
3687	CAC	CAT	H	H	Yes	Transcription-repair coupling factor	2341	5844	1
3749	CGT	CAT	R	H	No	Transcription-repair coupling factor	2341	5844	1
3757	AGA	CGA	R	R	Yes	Transcription-repair coupling factor	2341	5844	1
3864	ATT	ATC	I	I	Yes	Transcription-repair coupling factor	2341	5844	1
3880	AAA	CAA	K	Q	No	Transcription-repair coupling factor	2341	5844	1
3885	GGG	GGC	G	G	Yes	Transcription-repair coupling factor	2341	5844	1
3912	CAA	CAG	Q	Q	Yes	Transcription-repair coupling factor	2341	5844	1
4116	GGA	GGT	G	G	Yes	Transcription-repair coupling factor	2341	5844	1
4128	TCG	TCA	S	S	Yes	Transcription-repair coupling factor	2341	5844	1
4140	GAT	GAA	D	E	No	Transcription-repair coupling factor	2341	5844	1
4143	GAG	GAT	E	D	No	Transcription-repair coupling factor	2341	5844	1
4212	ATT	ATC	I	I	Yes	Transcription-repair coupling factor	2341	5844	1
4218	AGG	AGA	R	R	Yes	Transcription-repair coupling factor	2341	5844	1
4236	CAT	CAC	H	H	Yes	Transcription-repair coupling factor	2341	5844	1
4252	CTG	TTG	L	L	Yes	Transcription-repair coupling factor	2341	5844	1
4311	GCT	GCA	A	A	Yes	Transcription-repair coupling factor	2341	5844	1
4335	GTT	GTC	V	V	Yes	Transcription-repair coupling factor	2341	5844	1
4347	CCG	CCA	P	P	Yes	Transcription-repair coupling factor	2341	5844	1
4578	TTC	TTT	F	F	Yes	Transcription-repair coupling factor	2341	5844	1
4584	GTT	GTC	V	V	Yes	Transcription-repair coupling factor	2341	5844	1
4653	ATC	ATT	I	I	Yes	Transcription-repair coupling factor	2341	5844	1
4686	ATT	ATC	I	I	Yes	Transcription-repair coupling factor	2341	5844	1
4810	GTT	ATT	V	I	No	Transcription-repair coupling factor	2341	5844	1
4830	AAA	AAG	K	K	Yes	Transcription-repair coupling factor	2341	5844	1
4857	TCA	TCG	S	S	Yes	Transcription-repair coupling factor	2341	5844	1
4926	TTA	TTG	L	L	Yes	Transcription-repair coupling factor	2341	5844	1
4932	AAT	AAC	N	N	Yes	Transcription-repair coupling factor	2341	5844	1
4941	CTT	CTG	L	L	Yes	Transcription-repair coupling factor	2341	5844	1
5046	CAC	CAT	H	H	Yes	Transcription-repair coupling factor	2341	5844	1
5052	GGC	GGT	G	G	Yes	Transcription-repair coupling factor	2341	5844	1
5094	AGC	AGT	S	S	Yes	Transcription-repair coupling factor	2341	5844	1
5157	GAG	GAA	E	E	Yes	Transcription-repair coupling factor	2341	5844	1
5172	GCG	GCA	A	A	Yes	Transcription-repair coupling factor	2341	5844	1
5235	CGG	CGT	R	R	Yes	Transcription-repair coupling factor	2341	5844	1
5259	AAG	AAA	K	K	Yes	Transcription-repair coupling factor	2341	5844	1
5262	TCC	TCG	S	S	Yes	Transcription-repair coupling factor	2341	5844	1
5304	TCG	TCA	S	S	Yes	Transcription-repair coupling factor	2341	5844	1
5311	CTA	TTA	L	L	Yes	Transcription-repair coupling factor	2341	5844	1
5340	GGC	GGT	G	G	Yes	Transcription-repair coupling factor	2341	5844	1
5357	AGC	ATC	S	I	No	Transcription-repair coupling factor	2341	5844	1
5391	GAC	GAT	D	D	Yes	Transcription-repair coupling factor	2341	5844	1
5394	GCC	GCT	A	A	Yes	Transcription-repair coupling factor	2341	5844	1
5406	GAC	GAT	D	D	Yes	Transcription-repair coupling factor	2341	5844	1
5499	GAA	GAG	E	E	Yes	Transcription-repair coupling factor	2341	5844	1
5508	GAT	GAC	D	D	Yes	Transcription-repair coupling factor	2341	5844	1
5535	GTG	GTA	V	V	Yes	Transcription-repair coupling factor	2341	5844	1
5538	GCC	GCA	A	A	Yes	Transcription-repair coupling factor	2341	5844	1
5541	TAT	TAC	Y	Y	Yes	Transcription-repair coupling factor	2341	5844	1
5562	GTC	GTT	V	V	Yes	Transcription-repair coupling factor	2341	5844	1
5685	TCC	TCT	S	S	Yes	Transcription-repair coupling factor	2341	5844	1
5704	TCC	GCT	S	A	No	Transcription-repair coupling factor	2341	5844	1
5706	C	T	Merged with SNP 5704
5721	AAA	AAG	K	K	Yes	Transcription-repair coupling factor	2341	5844	1
5737	ATA	GTA	I	V	No	Transcription-repair coupling factor	2341	5844	1
5916	AAA	AAG	K	K	Yes	S4-domain-containing heat shock protein; S4-domain-containing heat shock protein	5902	6168	1
5994	AAC	AAT	N	N	Yes	S4-domain-containing heat shock protein; S4-domain-containing heat shock protein	5902	6168	1
6087	GAT	GAA	D	E	No	S4-domain-containing heat shock protein; S4-domain-containing heat shock protein	5902	6168	1
6114	GAT	GAC	D	D	Yes	S4-domain-containing heat shock protein; S4-domain-containing heat shock protein	5902	6168	1
6123	GGT	GGC	G	G	Yes	S4-domain-containing heat shock protein; S4-domain-containing heat shock protein	5902	6168	1
6319	GCC	GCT	A	A	Yes	Cell division protein DivIC	6161	6529	1
6340	CTG	CTA	L	L	Yes	Cell division protein DivIC	6161	6529	1
6346	CGA	CGC	R	R	Yes	Cell division protein DivIC	6161	6529	1
6358	TTA	TTG	L	L	Yes	Cell division protein DivIC	6161	6529	1
6394	GAT	GAC	D	D	Yes	Cell division protein DivIC	6161	6529	1
6412	TCC	TCT	S	S	Yes	Cell division protein DivIC	6161	6529	1
6415	GCC	GCT	A	A	Yes	Cell division protein DivIC	6161	6529	1
6454	AAG	AAA	K	K	Yes	Cell division protein DivIC	6161	6529	1
6567	CTA	TTA	L	L	Yes	FIG01114659: hypothetical protein	6534	6656	1
6603	ACT	GCT	T	A	No	FIG01114659: hypothetical protein	6534	6656	1
6696	ACC	ACT	T	T	Yes	FIG01114299: hypothetical protein	6649	7917	1
6759	ACC	ACA	T	T	Yes	FIG01114299: hypothetical protein	6649	7917	1
6813	TAT	TAC	Y	Y	Yes	FIG01114299: hypothetical protein	6649	7917	1
6831	TAT	TAC	Y	Y	Yes	FIG01114299: hypothetical protein	6649	7917	1
6878	ACC	AAC	T	N	No	FIG01114299: hypothetical protein	6649	7917	1
6880	ACC	GCC	T	A	No	FIG01114299: hypothetical protein	6649	7917	1
6891	ATA	ATC	I	I	Yes	FIG01114299: hypothetical protein	6649	7917	1
6969	CGG	CGC	R	R	Yes	FIG01114299: hypothetical protein	6649	7917	1
6972	TTG	TTA	L	L	Yes	FIG01114299: hypothetical protein	6649	7917	1
7025	CAG	CCG	Q	P	No	FIG01114299: hypothetical protein	6649	7917	1
7026	CAG	CAA	Q	Q	Yes	FIG01114299: hypothetical protein	6649	7917	1
7075	ACC	TCC	T	S	No	FIG01114299: hypothetical protein	6649	7917	1
7147	AAT	GAT	N	D	No	FIG01114299: hypothetical protein	6649	7917	1
7277	GCT	GGT	A	G	No	FIG01114299: hypothetical protein	6649	7917	1
7320	GCT	GCC	A	A	Yes	FIG01114299: hypothetical protein	6649	7917	1
7336	GCC	TCC	A	S	No	FIG01114299: hypothetical protein	6649	7917	1
7341	TAC	TAT	Y	Y	Yes	FIG01114299: hypothetical protein	6649	7917	1
7350	TAC	TAT	Y	Y	Yes	FIG01114299: hypothetical protein	6649	7917	1
7374	GGG	GGA	G	G	Yes	FIG01114299: hypothetical protein	6649	7917	1
7377	GAA	GAG	E	E	Yes	FIG01114299: hypothetical protein	6649	7917	1
7384	CTA	TTA	L	L	Yes	FIG01114299: hypothetical protein	6649	7917	1
7405	ATC	GTC	I	V	No	FIG01114299: hypothetical protein	6649	7917	1
7410	CCA	CCG	P	P	Yes	FIG01114299: hypothetical protein	6649	7917	1
7461	TTA	TTG	L	L	Yes	FIG01114299: hypothetical protein	6649	7917	1
7508	ACC	ATC	T	I	No	FIG01114299: hypothetical protein	6649	7917	1
7614	GGC	GGT	G	G	Yes	FIG01114299: hypothetical protein	6649	7917	1
7617	GAA	GAG	E	E	Yes	FIG01114299: hypothetical protein	6649	7917	1
7639	CTG	TTG	L	L	Yes	FIG01114299: hypothetical protein	6649	7917	1
7665	AAA	AAG	K	K	Yes	FIG01114299: hypothetical protein	6649	7917	1
7702	CTA	TTA	L	L	Yes	FIG01114299: hypothetical protein	6649	7917	1
7899	GTC	GTT	V	V	Yes	FIG01114299: hypothetical protein	6649	7917	1
7948	CGA	CAA	R	Q	No	tRNA(Ile)-lysidine synthetase	7914	9191	1
8024	CAG	CAT	Q	H	No	tRNA(Ile)-lysidine synthetase	7914	9191	1
8042	CAA	CAG	Q	Q	Yes	tRNA(Ile)-lysidine synthetase	7914	9191	1
8045	AAT	AAA	N	K	No	tRNA(Ile)-lysidine synthetase	7914	9191	1
8051	TTA	TTG	L	L	Yes	tRNA(Ile)-lysidine synthetase	7914	9191	1
8105	GAC	GAT	D	D	Yes	tRNA(Ile)-lysidine synthetase	7914	9191	1
8166	AGC	TGC	S	C	No	tRNA(Ile)-lysidine synthetase	7914	9191	1
8171	TTC	TTT	F	F	Yes	tRNA(Ile)-lysidine synthetase	7914	9191	1
8173	TTA	TCA	L	S	No	tRNA(Ile)-lysidine synthetase	7914	9191	1
8234	ATG	ATA	M	I	No	tRNA(Ile)-lysidine synthetase	7914	9191	1
8241	ATT	GTT	I	V	No	tRNA(Ile)-lysidine synthetase	7914	9191	1
8249	GCG	GCA	A	A	Yes	tRNA(Ile)-lysidine synthetase	7914	9191	1
8327	CTC	CTA	L	L	Yes	tRNA(Ile)-lysidine synthetase	7914	9191	1
8331	TAT	CAT	Y	H	No	tRNA(Ile)-lysidine synthetase	7914	9191	1
8354	AGA	AGT	R	S	No	tRNA(Ile)-lysidine synthetase	7914	9191	1
8379	ATT	CTC	I	L	No	tRNA(Ile)-lysidine synthetase	7914	9191	1
8381	T	C	Merged with SNP 8379
8395	CAT	CCT	H	P	No	tRNA(Ile)-lysidine synthetase	7914	9191	1
8411	GAT	GAC	D	D	Yes	tRNA(Ile)-lysidine synthetase	7914	9191	1
8480	CGA	CGG	R	R	Yes	tRNA(Ile)-lysidine synthetase	7914	9191	1
8490	TTA	ATA	L	I	No	tRNA(Ile)-lysidine synthetase	7914	9191	1
8518	CGT	CTT	R	L	No	tRNA(Ile)-lysidine synthetase	7914	9191	1
8582	GAG	GAA	E	E	Yes	tRNA(Ile)-lysidine synthetase	7914	9191	1
8619	CTA	TTC	L	F	No	tRNA(Ile)-lysidine synthetase	7914	9191	1
8621	A	C	Merged with SNP 8619
8633	TCT	TCA	S	S	Yes	tRNA(Ile)-lysidine synthetase	7914	9191	1
8634	CAA	AAA	Q	K	No	tRNA(Ile)-lysidine synthetase	7914	9191	1
8696	ACG	ACA	T	T	Yes	tRNA(Ile)-lysidine synthetase	7914	9191	1
8710	GAT	GCT	D	A	No	tRNA(Ile)-lysidine synthetase	7914	9191	1
8730	ACA	GCA	T	A	No	tRNA(Ile)-lysidine synthetase	7914	9191	1
8741	AGC	AGT	S	S	Yes	tRNA(Ile)-lysidine synthetase	7914	9191	1
8792	CAG	CAA	Q	Q	Yes	tRNA(Ile)-lysidine synthetase	7914	9191	1
8793	AAT	CGG	N	R	No	tRNA(Ile)-lysidine synthetase	7914	9191	1
8794	A	G	Merged with SNP 8793
8795	T	G	Merged with SNP 8793
8800	CGA	CAA	R	Q	No	tRNA(Ile)-lysidine synthetase	7914	9191	1
8802	GTT	ATT	V	I	No	tRNA(Ile)-lysidine synthetase	7914	9191	1
8878	AAG	ATG	K	M	No	tRNA(Ile)-lysidine synthetase	7914	9191	1
9064	ACA	ATA	T	I	No	tRNA(Ile)-lysidine synthetase	7914	9191	1
9375	ATC	ATT	I	I	Yes	Hypoxanthine-guanine phosphoribosyltransferase (EC 2.4.2.8)	9196	9738	1
9435	ATC	ATT	I	I	Yes	Hypoxanthine-guanine phosphoribosyltransferase (EC 2.4.2.8)	9196	9738	1
9460	GAT	AAT	D	N	No	Hypoxanthine-guanine phosphoribosyltransferase (EC 2.4.2.8)	9196	9738	1
9501	ATT	ATC	I	I	Yes	Hypoxanthine-guanine phosphoribosyltransferase (EC 2.4.2.8)	9196	9738	1
9507	ACG	ACA	T	T	Yes	Hypoxanthine-guanine phosphoribosyltransferase (EC 2.4.2.8)	9196	9738	1
9516	ACT	ACC	T	T	Yes	Hypoxanthine-guanine phosphoribosyltransferase (EC 2.4.2.8)	9196	9738	1
9524	AGT	AAT	S	N	No	Hypoxanthine-guanine phosphoribosyltransferase (EC 2.4.2.8)	9196	9738	1
9554	GTA	GCA	V	A	No	Hypoxanthine-guanine phosphoribosyltransferase (EC 2.4.2.8)	9196	9738	1
9556	GCT	ACT	A	T	No	Hypoxanthine-guanine phosphoribosyltransferase (EC 2.4.2.8)	9196	9738	1
9600	CGT	CGC	R	R	Yes	Hypoxanthine-guanine phosphoribosyltransferase (EC 2.4.2.8)	9196	9738	1
9624	TAC	TAT	Y	Y	Yes	Hypoxanthine-guanine phosphoribosyltransferase (EC 2.4.2.8)	9196	9738	1
9667	TTG	CTA	L	L	Yes	Hypoxanthine-guanine phosphoribosyltransferase (EC 2.4.2.8)	9196	9738	1
9669	G	A	Merged with SNP 9667
9672	GAC	GAT	D	D	Yes	Hypoxanthine-guanine phosphoribosyltransferase (EC 2.4.2.8)	9196	9738	1
9705	GTC	GTT	V	V	Yes	Hypoxanthine-guanine phosphoribosyltransferase (EC 2.4.2.8)	9196	9738	1
9786	AAT	AAC	N	N	Yes	Cell division protein FtsH (EC 3.4.24.-)	9754	11712	1
9795	CTA	CTC	L	L	Yes	Cell division protein FtsH (EC 3.4.24.-)	9754	11712	1
9867	AGC	AGT	S	S	Yes	Cell division protein FtsH (EC 3.4.24.-)	9754	11712	1
9933	TAT	TAC	Y	Y	Yes	Cell division protein FtsH (EC 3.4.24.-)	9754	11712	1
10002	ACG	ACT	T	T	Yes	Cell division protein FtsH (EC 3.4.24.-)	9754	11712	1
10026	ACA	ACT	T	T	Yes	Cell division protein FtsH (EC 3.4.24.-)	9754	11712	1
10055	ACT	AGT	T	S	No	Cell division protein FtsH (EC 3.4.24.-)	9754	11712	1
10056	ACT	ACC	T	T	Yes	Cell division protein FtsH (EC 3.4.24.-)	9754	11712	1
10077	ACA	ACC	T	T	Yes	Cell division protein FtsH (EC 3.4.24.-)	9754	11712	1
10204	TTA	CTA	L	L	Yes	Cell division protein FtsH (EC 3.4.24.-)	9754	11712	1
10275	GCC	GCT	A	A	Yes	Cell division protein FtsH (EC 3.4.24.-)	9754	11712	1
10284	GCT	GCA	A	A	Yes	Cell division protein FtsH (EC 3.4.24.-)	9754	11712	1
10308	CGA	CGT	R	R	Yes	Cell division protein FtsH (EC 3.4.24.-)	9754	11712	1
10311	TTT	TTC	F	F	Yes	Cell division protein FtsH (EC 3.4.24.-)	9754	11712	1
10314	TCA	TCG	S	S	Yes	Cell division protein FtsH (EC 3.4.24.-)	9754	11712	1
10323	GCA	GCT	A	A	Yes	Cell division protein FtsH (EC 3.4.24.-)	9754	11712	1
10353	GTT	GTA	V	V	Yes	Cell division protein FtsH (EC 3.4.24.-)	9754	11712	1
10368	TTC	TTT	F	F	Yes	Cell division protein FtsH (EC 3.4.24.-)	9754	11712	1
10392	ACC	ACA	T	T	Yes	Cell division protein FtsH (EC 3.4.24.-)	9754	11712	1
10416	GCG	GCA	A	A	Yes	Cell division protein FtsH (EC 3.4.24.-)	9754	11712	1
10470	GCG	GCA	A	A	Yes	Cell division protein FtsH (EC 3.4.24.-)	9754	11712	1
10479	GGA	GGG	G	G	Yes	Cell division protein FtsH (EC 3.4.24.-)	9754	11712	1
10488	GGA	GGT	G	G	Yes	Cell division protein FtsH (EC 3.4.24.-)	9754	11712	1
10545	GGG	GGT	G	G	Yes	Cell division protein FtsH (EC 3.4.24.-)	9754	11712	1
10548	GCT	GCA	A	A	Yes	Cell division protein FtsH (EC 3.4.24.-)	9754	11712	1
10554	CGA	CGT	R	R	Yes	Cell division protein FtsH (EC 3.4.24.-)	9754	11712	1
10563	TCA	TCC	S	S	Yes	Cell division protein FtsH (EC 3.4.24.-)	9754	11712	1
10728	GGA	GGG	G	G	Yes	Cell division protein FtsH (EC 3.4.24.-)	9754	11712	1
10731	ATT	ATC	I	I	Yes	Cell division protein FtsH (EC 3.4.24.-)	9754	11712	1
10860	CAC	CAT	H	H	Yes	Cell division protein FtsH (EC 3.4.24.-)	9754	11712	1
10890	GTG	GTT	V	V	Yes	Cell division protein FtsH (EC 3.4.24.-)	9754	11712	1
10917	ACT	ACC	T	T	Yes	Cell division protein FtsH (EC 3.4.24.-)	9754	11712	1
10941	TTG	TTA	L	L	Yes	Cell division protein FtsH (EC 3.4.24.-)	9754	11712	1
10956	AAT	AAC	N	N	Yes	Cell division protein FtsH (EC 3.4.24.-)	9754	11712	1
10959	GAG	GAA	E	E	Yes	Cell division protein FtsH (EC 3.4.24.-)	9754	11712	1
10989	AAG	AAA	K	K	Yes	Cell division protein FtsH (EC 3.4.24.-)	9754	11712	1
11025	GAA	GAG	E	E	Yes	Cell division protein FtsH (EC 3.4.24.-)	9754	11712	1
11055	AAG	AAA	K	K	Yes	Cell division protein FtsH (EC 3.4.24.-)	9754	11712	1
11079	GAA	GAG	E	E	Yes	Cell division protein FtsH (EC 3.4.24.-)	9754	11712	1
11082	CGG	CGT	R	R	Yes	Cell division protein FtsH (EC 3.4.24.-)	9754	11712	1
11115	ACT	ACC	T	T	Yes	Cell division protein FtsH (EC 3.4.24.-)	9754	11712	1
11130	GTC	GTA	V	V	Yes	Cell division protein FtsH (EC 3.4.24.-)	9754	11712	1
11131	TTG	CTG	L	L	Yes	Cell division protein FtsH (EC 3.4.24.-)	9754	11712	1
11187	GGT	GGC	G	G	Yes	Cell division protein FtsH (EC 3.4.24.-)	9754	11712	1
11190	GGT	GGA	G	G	Yes	Cell division protein FtsH (EC 3.4.24.-)	9754	11712	1
11202	GCG	GCA	A	A	Yes	Cell division protein FtsH (EC 3.4.24.-)	9754	11712	1
11208	CCG	CCT	P	P	Yes	Cell division protein FtsH (EC 3.4.24.-)	9754	11712	1
11214	GAG	GAA	E	E	Yes	Cell division protein FtsH (EC 3.4.24.-)	9754	11712	1
11304	GTC	GTT	V	V	Yes	Cell division protein FtsH (EC 3.4.24.-)	9754	11712	1
11310	ACG	ACT	T	T	Yes	Cell division protein FtsH (EC 3.4.24.-)	9754	11712	1
11523	GCA	GCT	A	A	Yes	Cell division protein FtsH (EC 3.4.24.-)	9754	11712	1
11532	ATC	ATT	I	I	Yes	Cell division protein FtsH (EC 3.4.24.-)	9754	11712	1
11535	ATT	ATC	I	I	Yes	Cell division protein FtsH (EC 3.4.24.-)	9754	11712	1
11538	CAG	CAA	Q	Q	Yes	Cell division protein FtsH (EC 3.4.24.-)	9754	11712	1
11553	ACT	ACG	T	T	Yes	Cell division protein FtsH (EC 3.4.24.-)	9754	11712	1
11574	GCA	GCG	A	A	Yes	Cell division protein FtsH (EC 3.4.24.-)	9754	11712	1
11586	TAC	TAT	Y	Y	Yes	Cell division protein FtsH (EC 3.4.24.-)	9754	11712	1
11625	GAA	GAG	E	E	Yes	Cell division protein FtsH (EC 3.4.24.-)	9754	11712	1
11668	CTA	TTA	L	L	Yes	Cell division protein FtsH (EC 3.4.24.-)	9754	11712	1
11677	AAT	GAT	N	D	No	Cell division protein FtsH (EC 3.4.24.-)	9754	11712	1
11772	T	C				Intergenic region
11780	T	C				Intergenic region
11879	A	G				Intergenic region
11882	G	A				Intergenic region
11933	G	A				Intergenic region
11978	A	G				Intergenic region
12028	CAG	CAA	Q	Q	Yes	Response regulator of the competence regulon ComE	12020	12562	1
12055	GCT	GCC	A	A	Yes	Response regulator of the competence regulon ComE	12020	12562	1
12058	ATT	ATG	I	M	No	Response regulator of the competence regulon ComE	12020	12562	1
12124	CTA	CTT	L	L	Yes	Response regulator of the competence regulon ComE	12020	12562	1
12161	AAA	TAA	K	*	No	Response regulator of the competence regulon ComE	12020	12562	1
12178	CAG	CAA	Q	Q	Yes	Response regulator of the competence regulon ComE	12020	12562	1
12193	ACT	ACC	T	T	Yes	Response regulator of the competence regulon ComE	12020	12562	1
12196	AAG	AAT	K	N	No	Response regulator of the competence regulon ComE	12020	12562	1
12214	AAC	AAC	N	N	Yes	Response regulator of the competence regulon ComE	12020	12562	1
12307	GTT	GTC	V	V	Yes	Response regulator of the competence regulon ComE	12020	12562	1
12326	ATT	TTT	I	F	No	Response regulator of the competence regulon ComE	12020	12562	1
12344	AAA	GAA	K	E	No	Response regulator of the competence regulon ComE	12020	12562	1
12590	G	A				Intergenic region
12596	T	C				Intergenic region
12608	A	C				Intergenic region
12611	A	G				Intergenic region
12632	A	G				Intergenic region
12860	T	C				Intergenic region
12911	G	A				Intergenic region
12941	G	A				Intergenic region
12968	A	G				Intergenic region
12974	A	G				Intergenic region
12977	A	T				Intergenic region
12989	G	A				Intergenic region
13010	C	A				Intergenic region
13037	A	G				Intergenic region
15033	T	C				Intergenic region
15133	T	A				Intergenic region
15592	A	C				Intergenic region
16212	G	T				Intergenic region
16460	A	G				Intergenic region
17919	G	A				Intergenic region
17922	T	C				Intergenic region
17934	T	C				Intergenic region
17938	G	A				Intergenic region
17966	T	C				Intergenic region
18023	C	T				Intergenic region
18077	T	C				Intergenic region
18126	A	C				Intergenic region
18131	A	G				Intergenic region
18184	C	T				Intergenic region
18348	C	A				Intergenic region
18431	A	C				Intergenic region
18456	G	A				Intergenic region
18576	CTG	CTC	L	L	Yes	Adenylosuccinate synthetase (EC 6.3.4.4)	18553	19887	1
18630	CAG	CAA	Q	Q	Yes	Adenylosuccinate synthetase (EC 6.3.4.4)	18553	19887	1
18636	GGT	GGC	G	G	Yes	Adenylosuccinate synthetase (EC 6.3.4.4)	18553	19887	1
19362	GGT	GGC	G	G	Yes	Adenylosuccinate synthetase (EC 6.3.4.4)	18553	19887	1
19470	CGC	CGT	R	R	Yes	Adenylosuccinate synthetase (EC 6.3.4.4)	18553	19887	1
19488	TAT	TAC	Y	Y	Yes	Adenylosuccinate synthetase (EC 6.3.4.4)	18553	19887	1
19518	GTG	GTA	V	V	Yes	Adenylosuccinate synthetase (EC 6.3.4.4)	18553	19887	1
19545	CGC	CGT	R	R	Yes	Adenylosuccinate synthetase (EC 6.3.4.4)	18553	19887	1
19552	CGC	TGC	R	C	No	Adenylosuccinate synthetase (EC 6.3.4.4)	18553	19887	1
19593	ATA	ATC	I	I	Yes	Adenylosuccinate synthetase (EC 6.3.4.4)	18553	19887	1
19632	GTC	GTG	V	V	Yes	Adenylosuccinate synthetase (EC 6.3.4.4)	18553	19887	1
19758	TTG	TTA	L	L	Yes	Adenylosuccinate synthetase (EC 6.3.4.4)	18553	19887	1
19803	AGT	AGC	S	S	Yes	Adenylosuccinate synthetase (EC 6.3.4.4)	18553	19887	1
19821	CGC	CGT	R	R	Yes	Adenylosuccinate synthetase (EC 6.3.4.4)	18553	19887	1
19824	ATT	ATC	I	I	Yes	Adenylosuccinate synthetase (EC 6.3.4.4)	18553	19887	1
19827	TCG	TCA	S	S	Yes	Adenylosuccinate synthetase (EC 6.3.4.4)	18553	19887	1
19830	ACA	ACT	T	T	Yes	Adenylosuccinate synthetase (EC 6.3.4.4)	18553	19887	1
19845	CCT	CCC	P	P	Yes	Adenylosuccinate synthetase (EC 6.3.4.4)	18553	19887	1
20117	GCT	GCC	A	A	Yes	tRNA-specific adenosine-34 deaminase (EC 3.5.4.-)	20088	20555	1
20153	GCT	GCC	A	A	Yes	tRNA-specific adenosine-34 deaminase (EC 3.5.4.-)	20088	20555	1
20159	GAG	GAA	E	E	Yes	tRNA-specific adenosine-34 deaminase (EC 3.5.4.-)	20088	20555	1
20219	GGA	GGG	G	G	Yes	tRNA-specific adenosine-34 deaminase (EC 3.5.4.-)	20088	20555	1
20289	CTG	GTG	L	V	No	tRNA-specific adenosine-34 deaminase (EC 3.5.4.-)	20088	20555	1
20309	CGT	CGC	R	R	Yes	tRNA-specific adenosine-34 deaminase (EC 3.5.4.-)	20088	20555	1
20315	CTG	CTC	L	L	Yes	tRNA-specific adenosine-34 deaminase (EC 3.5.4.-)	20088	20555	1
20324	ACC	ACG	T	T	Yes	tRNA-specific adenosine-34 deaminase (EC 3.5.4.-)	20088	20555	1
20393	GTG	GTA	V	V	Yes	tRNA-specific adenosine-34 deaminase (EC 3.5.4.-)	20088	20555	1
20399	TAT	TAC	Y	Y	Yes	tRNA-specific adenosine-34 deaminase (EC 3.5.4.-)	20088	20555	1
20408	AAA	AAG	K	K	Yes	tRNA-specific adenosine-34 deaminase (EC 3.5.4.-)	20088	20555	1
20435	AGT	AGC	S	S	Yes	tRNA-specific adenosine-34 deaminase (EC 3.5.4.-)	20088	20555	1
20483	GTG	GTA	V	V	Yes	tRNA-specific adenosine-34 deaminase (EC 3.5.4.-)	20088	20555	1
20570	T	C				Intergenic region
20591	A	G				Intergenic region
20593	C	A				Intergenic region
21253	GCA	GCC	A	A	Yes	hypothetical protein	21194	21661	1
21526	GTC	GTT	V	V	Yes	hypothetical protein	21194	21661	1
22170	TCC	TCT	S	S	Yes	DNA repair protein RadA	21796	23019	1
22200	TCT	TCA	S	S	Yes	DNA repair protein RadA	21796	23019	1
22203	GGA	GGG	G	G	Yes	DNA repair protein RadA	21796	23019	1
22209	CAA	CAG	Q	Q	Yes	DNA repair protein RadA	21796	23019	1
22215	TCA	TCT	S	S	Yes	DNA repair protein RadA	21796	23019	1
22254	CAG	CAA	Q	Q	Yes	DNA repair protein RadA	21796	23019	1
22255	CTG	TTA	L	L	Yes	DNA repair protein RadA	21796	23019	1
22257	G	A	Merged with SNP 22255
22260	GCC	GCG	A	A	Yes	DNA repair protein RadA	21796	23019	1
22278	GCT	GCC	A	A	Yes	DNA repair protein RadA	21796	23019	1
22320	GCT	GCG	A	A	Yes	DNA repair protein RadA	21796	23019	1
22353	ACG	ACA	T	T	Yes	DNA repair protein RadA	21796	23019	1
22377	CGC	CGT	R	R	Yes	DNA repair protein RadA	21796	23019	1
22389	TTC	TTT	F	F	Yes	DNA repair protein RadA	21796	23019	1
22476	GTA	GTG	V	V	Yes	DNA repair protein RadA	21796	23019	1
22554	GGG	GGA	G	G	Yes	DNA repair protein RadA	21796	23019	1
22587	TTG	TTA	L	L	Yes	DNA repair protein RadA	21796	23019	1
22590	GTA	GTG	V	V	Yes	DNA repair protein RadA	21796	23019	1
22599	ACC	ACT	T	T	Yes	DNA repair protein RadA	21796	23019	1
22620	CGT	CGC	R	R	Yes	DNA repair protein RadA	21796	23019	1
22623	ACG	ACA	T	T	Yes	DNA repair protein RadA	21796	23019	1
22629	ACT	ACA	T	T	Yes	DNA repair protein RadA	21796	23019	1
22632	GGA	GGT	G	G	Yes	DNA repair protein RadA	21796	23019	1
22692	CTC	CTT	L	L	Yes	DNA repair protein RadA	21796	23019	1
22731	GGC	GGT	G	G	Yes	DNA repair protein RadA	21796	23019	1
22752	GCT	GCC	A	A	Yes	DNA repair protein RadA	21796	23019	1
22869	CGT	CGC	R	R	Yes	DNA repair protein RadA	21796	23019	1
22884	ATC	ATT	I	I	Yes	DNA repair protein RadA	21796	23019	1
22983	ACG	ACA	T	T	Yes	DNA repair protein RadA	21796	23019	1
22986	ACT	ACG	T	T	Yes	DNA repair protein RadA	21796	23019	1
22992	CAG	CAA	Q	Q	Yes	DNA repair protein RadA	21796	23019	1
23033	T	C				Intergenic region
23069	G	A				Intergenic region
23310	GTA	GTG	V	V	Yes	Carbonic anhydrase (EC 4.2.1.1)	23092	23586	1
23319	CAG	CAA	Q	Q	Yes	Carbonic anhydrase (EC 4.2.1.1)	23092	23586	1
23325	CAA	CAG	Q	Q	Yes	Carbonic anhydrase (EC 4.2.1.1)	23092	23586	1
23331	GGG	GGA	G	G	Yes	Carbonic anhydrase (EC 4.2.1.1)	23092	23586	1
23383	CAA	AAA	Q	K	No	Carbonic anhydrase (EC 4.2.1.1)	23092	23586	1
23475	AGT	AGC	S	S	Yes	Carbonic anhydrase (EC 4.2.1.1)	23092	23586	1
23657	G	A				Intergenic region
23696	G	A				Intergenic region
23822	CTA	CTG	L	L	Yes	Ribose-phosphate pyrophosphokinase (EC 2.7.6.1)	23799	24767	1
23855	GAG	GAA	E	E	Yes	Ribose-phosphate pyrophosphokinase (EC 2.7.6.1)	23799	24767	1
23918	GGA	GGG	G	G	Yes	Ribose-phosphate pyrophosphokinase (EC 2.7.6.1)	23799	24767	1
24200	GCA	GCG	A	A	Yes	Ribose-phosphate pyrophosphokinase (EC 2.7.6.1)	23799	24767	1
24925	ATC	ATA	I	I	Yes	Succinyl-CoA synthetase, alpha subunit-related enzymes	24887	25324	1
25923	GTC	GTT	V	V	Yes	Putative membrane protein YeiH	25353	26363	-1
25977	GGT	GGA	G	G	Yes	Putative membrane protein YeiH	25353	26363	-1
25986	TCT	TCG	S	S	Yes	Putative membrane protein YeiH	25353	26363	-1
25992	GGT	GGA	G	G	Yes	Putative membrane protein YeiH	25353	26363	-1
26019	ACG	ATA	T	I	No	Putative membrane protein YeiH	25353	26363	-1
26020	G	A	Merged with SNP 26019
26102	ACT	TCT	T	S	No	Putative membrane protein YeiH	25353	26363	-1
26115	TTT	TTC	F	F	Yes	Putative membrane protein YeiH	25353	26363	-1
26189	GCC	ACC	A	T	No	Putative membrane protein YeiH	25353	26363	-1
26295	TTT	TTC	F	F	Yes	Putative membrane protein YeiH	25353	26363	-1
26334	GGC	GGA	G	G	Yes	Putative membrane protein YeiH	25353	26363	-1
26404	T	C				Intergenic region
26441	G	T				Intergenic region
26465	G	A				Intergenic region
26775	GAC	GAT	D	D	Yes	Aromatic amino acid aminotransferase gamma (EC 2.6.1.57) @ N-acetyl-L,L-diaminopimelate aminotransferase (EC 2.6.1.-)	26515	27684	1
26779	GCT	AAT	A	N	No	Aromatic amino acid aminotransferase gamma (EC 2.6.1.57) @ N-acetyl-L,L-diaminopimelate aminotransferase (EC 2.6.1.-)	26515	27684	1
26780	C	A	Merged with SNP 26779
26814	GCG	GCA	A	A	Yes	Aromatic amino acid aminotransferase gamma (EC 2.6.1.57) @ N-acetyl-L,L-diaminopimelate aminotransferase (EC 2.6.1.-)	26515	27684	1
26859	GGA	GGG	G	G	Yes	Aromatic amino acid aminotransferase gamma (EC 2.6.1.57) @ N-acetyl-L,L-diaminopimelate aminotransferase (EC 2.6.1.-)	26515	27684	1
26886	GCC	GCT	A	A	Yes	Aromatic amino acid aminotransferase gamma (EC 2.6.1.57) @ N-acetyl-L,L-diaminopimelate aminotransferase (EC 2.6.1.-)	26515	27684	1
26895	GGT	GGC	G	G	Yes	Aromatic amino acid aminotransferase gamma (EC 2.6.1.57) @ N-acetyl-L,L-diaminopimelate aminotransferase (EC 2.6.1.-)	26515	27684	1
26964	GTT	GTC	V	V	Yes	Aromatic amino acid aminotransferase gamma (EC 2.6.1.57) @ N-acetyl-L,L-diaminopimelate aminotransferase (EC 2.6.1.-)	26515	27684	1
26970	ACC	ACT	T	T	Yes	Aromatic amino acid aminotransferase gamma (EC 2.6.1.57) @ N-acetyl-L,L-diaminopimelate aminotransferase (EC 2.6.1.-)	26515	27684	1
27006	GGT	GGG	G	G	Yes	Aromatic amino acid aminotransferase gamma (EC 2.6.1.57) @ N-acetyl-L,L-diaminopimelate aminotransferase (EC 2.6.1.-)	26515	27684	1
27219	TTA	TTG	L	L	Yes	Aromatic amino acid aminotransferase gamma (EC 2.6.1.57) @ N-acetyl-L,L-diaminopimelate aminotransferase (EC 2.6.1.-)	26515	27684	1
27228	TCC	TCG	S	S	Yes	Aromatic amino acid aminotransferase gamma (EC 2.6.1.57) @ N-acetyl-L,L-diaminopimelate aminotransferase (EC 2.6.1.-)	26515	27684	1
27405	ATC	ATT	I	I	Yes	Aromatic amino acid aminotransferase gamma (EC 2.6.1.57) @ N-acetyl-L,L-diaminopimelate aminotransferase (EC 2.6.1.-)	26515	27684	1
28385	CTT	CTA	L	L	Yes	DNA recombination and repair protein RecO	27681	28451	1
28403	ATT	ATC	I	I	Yes	DNA recombination and repair protein RecO	27681	28451	1
28443	AAC	GAC	N	D	No	DNA recombination and repair protein RecO	27681	28451	1
28459	ATT	ATC	I	I	Yes	Phosphate:acyl-ACP acyltransferase PlsX	28448	29440	1
28531	GAT	GAC	D	D	Yes	Phosphate:acyl-ACP acyltransferase PlsX	28448	29440	1
28552	CAA	CAG	Q	Q	Yes	Phosphate:acyl-ACP acyltransferase PlsX	28448	29440	1
28594	GCG	GCT	A	A	Yes	Phosphate:acyl-ACP acyltransferase PlsX	28448	29440	1
28693	TTA	TTG	L	L	Yes	Phosphate:acyl-ACP acyltransferase PlsX	28448	29440	1
28696	GCG	GCA	A	A	Yes	Phosphate:acyl-ACP acyltransferase PlsX	28448	29440	1
28699	GCC	GCT	A	A	Yes	Phosphate:acyl-ACP acyltransferase PlsX	28448	29440	1
28705	GCA	GCT	A	A	Yes	Phosphate:acyl-ACP acyltransferase PlsX	28448	29440	1
28708	GTC	GTT	V	V	Yes	Phosphate:acyl-ACP acyltransferase PlsX	28448	29440	1
28726	GAT	GAC	D	D	Yes	Phosphate:acyl-ACP acyltransferase PlsX	28448	29440	1
28780	ATC	ATT	I	I	Yes	Phosphate:acyl-ACP acyltransferase PlsX	28448	29440	1
28822	TCG	TCT	S	S	Yes	Phosphate:acyl-ACP acyltransferase PlsX	28448	29440	1
28837	ATC	ATT	I	I	Yes	Phosphate:acyl-ACP acyltransferase PlsX	28448	29440	1
28849	GGG	GGC	G	G	Yes	Phosphate:acyl-ACP acyltransferase PlsX	28448	29440	1
28870	GGG	GGA	G	G	Yes	Phosphate:acyl-ACP acyltransferase PlsX	28448	29440	1
28879	GCA	GCG	A	A	Yes	Phosphate:acyl-ACP acyltransferase PlsX	28448	29440	1
28949	ATT	GTT	I	V	No	Phosphate:acyl-ACP acyltransferase PlsX	28448	29440	1
29033	TTA	CTA	L	L	Yes	Phosphate:acyl-ACP acyltransferase PlsX	28448	29440	1
29045	GAA	CAA	E	Q	No	Phosphate:acyl-ACP acyltransferase PlsX	28448	29440	1
29149	TCT	TCC	S	S	Yes	Phosphate:acyl-ACP acyltransferase PlsX	28448	29440	1
29152	ATC	ATT	I	I	Yes	Phosphate:acyl-ACP acyltransferase PlsX	28448	29440	1
29158	GGT	GGG	G	G	Yes	Phosphate:acyl-ACP acyltransferase PlsX	28448	29440	1
29164	GCT	GCC	A	A	Yes	Phosphate:acyl-ACP acyltransferase PlsX	28448	29440	1
29185	CTT	CTC	L	L	Yes	Phosphate:acyl-ACP acyltransferase PlsX	28448	29440	1
29200	ACG	ACA	T	T	Yes	Phosphate:acyl-ACP acyltransferase PlsX	28448	29440	1
29209	GGC	GGT	G	G	Yes	Phosphate:acyl-ACP acyltransferase PlsX	28448	29440	1
29353	AAT	AAG	N	K	No	Phosphate:acyl-ACP acyltransferase PlsX	28448	29440	1
29413	CAG	CAA	Q	Q	Yes	Phosphate:acyl-ACP acyltransferase PlsX	28448	29440	1
29494	AGA	CGA	R	R	Yes	Acyl carrier protein	29446	29682	1
29526	GCT	GCC	A	A	Yes	Acyl carrier protein	29446	29682	1
29565	GAT	GAC	D	D	Yes	Acyl carrier protein	29446	29682	1
29580	GTT	GTC	V	V	Yes	Acyl carrier protein	29446	29682	1
29631	GAC	GAT	D	D	Yes	Acyl carrier protein	29446	29682	1
29735	C	T				Intergenic region
29783	C	T				Intergenic region
29784	A	G				Intergenic region
29799	T	C				Intergenic region
29904	C	T				Intergenic region
29907	T	C				Intergenic region
29909	T	C				Intergenic region
31775	GTC	GTT	V	V	Yes	Competence-stimulating peptide ABC transporter ATP-binding protein ComA	31137	33290	1
31787	ATT	ATC	I	I	Yes	Competence-stimulating peptide ABC transporter ATP-binding protein ComA	31137	33290	1
31853	ATC	ATT	I	I	Yes	Competence-stimulating peptide ABC transporter ATP-binding protein ComA	31137	33290	1
31889	CAC	CAT	H	H	Yes	Competence-stimulating peptide ABC transporter ATP-binding protein ComA	31137	33290	1
31934	GTT	GTA	V	V	Yes	Competence-stimulating peptide ABC transporter ATP-binding protein ComA	31137	33290	1
31971	CTG	TTG	L	L	Yes	Competence-stimulating peptide ABC transporter ATP-binding protein ComA	31137	33290	1
32732	AAT	AAC	N	N	Yes	Competence-stimulating peptide ABC transporter ATP-binding protein ComA	31137	33290	1
32735	TTT	TTC	F	F	Yes	Competence-stimulating peptide ABC transporter ATP-binding protein ComA	31137	33290	1
32741	GAC	GAT	D	D	Yes	Competence-stimulating peptide ABC transporter ATP-binding protein ComA	31137	33290	1
32802	CTG	TTG	L	L	Yes	Competence-stimulating peptide ABC transporter ATP-binding protein ComA	31137	33290	1
32825	CTG	CTA	L	L	Yes	Competence-stimulating peptide ABC transporter ATP-binding protein ComA	31137	33290	1
33203	GTC	GTT	V	V	Yes	Competence-stimulating peptide ABC transporter ATP-binding protein ComA	31137	33290	1
33207	GAT	AAT	D	N	No	Competence-stimulating peptide ABC transporter ATP-binding protein ComA	31137	33290	1
33218	AAG	AAA	K	K	Yes	Competence-stimulating peptide ABC transporter ATP-binding protein ComA	31137	33290	1
33350	TAC	TAT	Y	Y	Yes	Competence-stimulating peptide ABC transporter permease protein ComB	33303	34652	1
33393	CTC	TTC	L	F	No	Competence-stimulating peptide ABC transporter permease protein ComB	33303	34652	1
33396	ATG	GTG	M	V	No	Competence-stimulating peptide ABC transporter permease protein ComB	33303	34652	1
33473	CGG	CGT	R	R	Yes	Competence-stimulating peptide ABC transporter permease protein ComB	33303	34652	1
33540	TTG	CTG	L	L	Yes	Competence-stimulating peptide ABC transporter permease protein ComB	33303	34652	1
33549	CAA	AAA	Q	K	No	Competence-stimulating peptide ABC transporter permease protein ComB	33303	34652	1
33581	GGA	GGG	G	G	Yes	Competence-stimulating peptide ABC transporter permease protein ComB	33303	34652	1
33591	ATC	GTC	I	V	No	Competence-stimulating peptide ABC transporter permease protein ComB	33303	34652	1
33611	GCT	GCC	A	A	Yes	Competence-stimulating peptide ABC transporter permease protein ComB	33303	34652	1
33716	TAC	TAT	Y	Y	Yes	Competence-stimulating peptide ABC transporter permease protein ComB	33303	34652	1
33719	CAA	CAG	Q	Q	Yes	Competence-stimulating peptide ABC transporter permease protein ComB	33303	34652	1
33764	AGC	AGT	S	S	Yes	Competence-stimulating peptide ABC transporter permease protein ComB	33303	34652	1
33773	TCG	TCT	S	S	Yes	Competence-stimulating peptide ABC transporter permease protein ComB	33303	34652	1
33787	AAC	AGC	N	S	No	Competence-stimulating peptide ABC transporter permease protein ComB	33303	34652	1
33845	ATC	ATT	I	I	Yes	Competence-stimulating peptide ABC transporter permease protein ComB	33303	34652	1
34280	AGT	AGC	S	S	Yes	Competence-stimulating peptide ABC transporter permease protein ComB	33303	34652	1
34283	GAA	GAT	E	D	No	Competence-stimulating peptide ABC transporter permease protein ComB	33303	34652	1
34346	GGG	GGC	G	G	Yes	Competence-stimulating peptide ABC transporter permease protein ComB	33303	34652	1
34352	ACC	ACT	T	T	Yes	Competence-stimulating peptide ABC transporter permease protein ComB	33303	34652	1
34361	ACA	ACG	T	T	Yes	Competence-stimulating peptide ABC transporter permease protein ComB	33303	34652	1
34412	GTT	GTC	V	V	Yes	Competence-stimulating peptide ABC transporter permease protein ComB	33303	34652	1
34460	TCT	TCC	S	S	Yes	Competence-stimulating peptide ABC transporter permease protein ComB	33303	34652	1
34555	GAA	GCA	E	A	No	Competence-stimulating peptide ABC transporter permease protein ComB	33303	34652	1
34558	AAA	ACA	K	T	No	Competence-stimulating peptide ABC transporter permease protein ComB	33303	34652	1
34565	CGC	CGT	R	R	Yes	Competence-stimulating peptide ABC transporter permease protein ComB	33303	34652	1
34595	ATT	ATC	I	I	Yes	Competence-stimulating peptide ABC transporter permease protein ComB	33303	34652	1
34598	ACG	ACA	T	T	Yes	Competence-stimulating peptide ABC transporter permease protein ComB	33303	34652	1
34601	GGA	GGG	G	G	Yes	Competence-stimulating peptide ABC transporter permease protein ComB	33303	34652	1
34673	T	A				Intergenic region
34684	T	A				Intergenic region
34700	C	T				Intergenic region
34702	T	C				Intergenic region
34770	T	C				Intergenic region
34920	GCC	GCT	A	A	Yes	Phosphoribosylaminoimidazole-succinocarboxamide synthase (EC 6.3.2.6)	34822	35529	1
34923	TTC	TTT	F	F	Yes	Phosphoribosylaminoimidazole-succinocarboxamide synthase (EC 6.3.2.6)	34822	35529	1
35025	CAC	CAT	H	H	Yes	Phosphoribosylaminoimidazole-succinocarboxamide synthase (EC 6.3.2.6)	34822	35529	1
35035	GAA	AAG	E	K	No	Phosphoribosylaminoimidazole-succinocarboxamide synthase (EC 6.3.2.6)	34822	35529	1
35037	A	G	Merged with SNP 35035
35038	ATT	CTT	I	L	No	Phosphoribosylaminoimidazole-succinocarboxamide synthase (EC 6.3.2.6)	34822	35529	1
35055	CAA	CAG	Q	Q	Yes	Phosphoribosylaminoimidazole-succinocarboxamide synthase (EC 6.3.2.6)	34822	35529	1
35070	GTG	GTT	V	V	Yes	Phosphoribosylaminoimidazole-succinocarboxamide synthase (EC 6.3.2.6)	34822	35529	1
35109	ACG	ACA	T	T	Yes	Phosphoribosylaminoimidazole-succinocarboxamide synthase (EC 6.3.2.6)	34822	35529	1
35220	GAT	GAC	D	D	Yes	Phosphoribosylaminoimidazole-succinocarboxamide synthase (EC 6.3.2.6)	34822	35529	1
35238	CTA	CTT	L	L	Yes	Phosphoribosylaminoimidazole-succinocarboxamide synthase (EC 6.3.2.6)	34822	35529	1
35253	GAT	GAC	D	D	Yes	Phosphoribosylaminoimidazole-succinocarboxamide synthase (EC 6.3.2.6)	34822	35529	1
35298	GAA	GAG	E	E	Yes	Phosphoribosylaminoimidazole-succinocarboxamide synthase (EC 6.3.2.6)	34822	35529	1
35301	CTT	CTC	L	L	Yes	Phosphoribosylaminoimidazole-succinocarboxamide synthase (EC 6.3.2.6)	34822	35529	1
35307	AAG	AAA	K	K	Yes	Phosphoribosylaminoimidazole-succinocarboxamide synthase (EC 6.3.2.6)	34822	35529	1
35328	GGT	GGC	G	G	Yes	Phosphoribosylaminoimidazole-succinocarboxamide synthase (EC 6.3.2.6)	34822	35529	1
35350	CTA	TTA	L	L	Yes	Phosphoribosylaminoimidazole-succinocarboxamide synthase (EC 6.3.2.6)	34822	35529	1
35358	TTC	TTT	F	F	Yes	Phosphoribosylaminoimidazole-succinocarboxamide synthase (EC 6.3.2.6)	34822	35529	1
35460	TTC	TTT	F	F	Yes	Phosphoribosylaminoimidazole-succinocarboxamide synthase (EC 6.3.2.6)	34822	35529	1
35772	CAA	CAG	Q	Q	Yes	Phosphoribosylformylglycinamidine synthase, synthetase subunit (EC 6.3.5.3) / Phosphoribosylformylglycinamidine synthase, glutamine amidotransferase subunit (EC 6.3.5.3)	35731	39456	1
36153	AAT	AAC	N	N	Yes	Phosphoribosylformylglycinamidine synthase, synthetase subunit (EC 6.3.5.3) / Phosphoribosylformylglycinamidine synthase, glutamine amidotransferase subunit (EC 6.3.5.3)	35731	39456	1
36336	TAT	TAC	Y	Y	Yes	Phosphoribosylformylglycinamidine synthase, synthetase subunit (EC 6.3.5.3) / Phosphoribosylformylglycinamidine synthase, glutamine amidotransferase subunit (EC 6.3.5.3)	35731	39456	1
36342	AAG	AAA	K	K	Yes	Phosphoribosylformylglycinamidine synthase, synthetase subunit (EC 6.3.5.3) / Phosphoribosylformylglycinamidine synthase, glutamine amidotransferase subunit (EC 6.3.5.3)	35731	39456	1
36357	GTG	GTA	V	V	Yes	Phosphoribosylformylglycinamidine synthase, synthetase subunit (EC 6.3.5.3) / Phosphoribosylformylglycinamidine synthase, glutamine amidotransferase subunit (EC 6.3.5.3)	35731	39456	1
36363	ACA	ACG	T	T	Yes	Phosphoribosylformylglycinamidine synthase, synthetase subunit (EC 6.3.5.3) / Phosphoribosylformylglycinamidine synthase, glutamine amidotransferase subunit (EC 6.3.5.3)	35731	39456	1
36387	GAC	GAT	D	D	Yes	Phosphoribosylformylglycinamidine synthase, synthetase subunit (EC 6.3.5.3) / Phosphoribosylformylglycinamidine synthase, glutamine amidotransferase subunit (EC 6.3.5.3)	35731	39456	1
36393	TAT	TAC	Y	Y	Yes	Phosphoribosylformylglycinamidine synthase, synthetase subunit (EC 6.3.5.3) / Phosphoribosylformylglycinamidine synthase, glutamine amidotransferase subunit (EC 6.3.5.3)	35731	39456	1
36414	CAT	CAC	H	H	Yes	Phosphoribosylformylglycinamidine synthase, synthetase subunit (EC 6.3.5.3) / Phosphoribosylformylglycinamidine synthase, glutamine amidotransferase subunit (EC 6.3.5.3)	35731	39456	1
36420	ACA	ACT	T	T	Yes	Phosphoribosylformylglycinamidine synthase, synthetase subunit (EC 6.3.5.3) / Phosphoribosylformylglycinamidine synthase, glutamine amidotransferase subunit (EC 6.3.5.3)	35731	39456	1
36423	TTC	TTT	F	F	Yes	Phosphoribosylformylglycinamidine synthase, synthetase subunit (EC 6.3.5.3) / Phosphoribosylformylglycinamidine synthase, glutamine amidotransferase subunit (EC 6.3.5.3)	35731	39456	1
36429	ACT	ACG	T	T	Yes	Phosphoribosylformylglycinamidine synthase, synthetase subunit (EC 6.3.5.3) / Phosphoribosylformylglycinamidine synthase, glutamine amidotransferase subunit (EC 6.3.5.3)	35731	39456	1
36439	AAC	CAC	N	H	No	Phosphoribosylformylglycinamidine synthase, synthetase subunit (EC 6.3.5.3) / Phosphoribosylformylglycinamidine synthase, glutamine amidotransferase subunit (EC 6.3.5.3)	35731	39456	1
36447	GAC	GAT	D	D	Yes	Phosphoribosylformylglycinamidine synthase, synthetase subunit (EC 6.3.5.3) / Phosphoribosylformylglycinamidine synthase, glutamine amidotransferase subunit (EC 6.3.5.3)	35731	39456	1
36567	TTT	TTC	F	F	Yes	Phosphoribosylformylglycinamidine synthase, synthetase subunit (EC 6.3.5.3) / Phosphoribosylformylglycinamidine synthase, glutamine amidotransferase subunit (EC 6.3.5.3)	35731	39456	1
36590	GGT	GAT	G	D	No	Phosphoribosylformylglycinamidine synthase, synthetase subunit (EC 6.3.5.3) / Phosphoribosylformylglycinamidine synthase, glutamine amidotransferase subunit (EC 6.3.5.3)	35731	39456	1
36630	GCC	GCA	A	A	Yes	Phosphoribosylformylglycinamidine synthase, synthetase subunit (EC 6.3.5.3) / Phosphoribosylformylglycinamidine synthase, glutamine amidotransferase subunit (EC 6.3.5.3)	35731	39456	1
36684	CTC	CTT	L	L	Yes	Phosphoribosylformylglycinamidine synthase, synthetase subunit (EC 6.3.5.3) / Phosphoribosylformylglycinamidine synthase, glutamine amidotransferase subunit (EC 6.3.5.3)	35731	39456	1
36690	TTT	TTC	F	F	Yes	Phosphoribosylformylglycinamidine synthase, synthetase subunit (EC 6.3.5.3) / Phosphoribosylformylglycinamidine synthase, glutamine amidotransferase subunit (EC 6.3.5.3)	35731	39456	1
36726	GAA	GAG	E	E	Yes	Phosphoribosylformylglycinamidine synthase, synthetase subunit (EC 6.3.5.3) / Phosphoribosylformylglycinamidine synthase, glutamine amidotransferase subunit (EC 6.3.5.3)	35731	39456	1
36888	AAG	AAA	K	K	Yes	Phosphoribosylformylglycinamidine synthase, synthetase subunit (EC 6.3.5.3) / Phosphoribosylformylglycinamidine synthase, glutamine amidotransferase subunit (EC 6.3.5.3)	35731	39456	1
36936	GCG	GCA	A	A	Yes	Phosphoribosylformylglycinamidine synthase, synthetase subunit (EC 6.3.5.3) / Phosphoribosylformylglycinamidine synthase, glutamine amidotransferase subunit (EC 6.3.5.3)	35731	39456	1
36969	GGC	GGT	G	G	Yes	Phosphoribosylformylglycinamidine synthase, synthetase subunit (EC 6.3.5.3) / Phosphoribosylformylglycinamidine synthase, glutamine amidotransferase subunit (EC 6.3.5.3)	35731	39456	1
37113	GGG	GGA	G	G	Yes	Phosphoribosylformylglycinamidine synthase, synthetase subunit (EC 6.3.5.3) / Phosphoribosylformylglycinamidine synthase, glutamine amidotransferase subunit (EC 6.3.5.3)	35731	39456	1
37155	GGT	GGA	G	G	Yes	Phosphoribosylformylglycinamidine synthase, synthetase subunit (EC 6.3.5.3) / Phosphoribosylformylglycinamidine synthase, glutamine amidotransferase subunit (EC 6.3.5.3)	35731	39456	1
38771	GGA	GAA	G	E	No	Phosphoribosylformylglycinamidine synthase, synthetase subunit (EC 6.3.5.3) / Phosphoribosylformylglycinamidine synthase, glutamine amidotransferase subunit (EC 6.3.5.3)	35731	39456	1
38799	ACC	ACT	T	T	Yes	Phosphoribosylformylglycinamidine synthase, synthetase subunit (EC 6.3.5.3) / Phosphoribosylformylglycinamidine synthase, glutamine amidotransferase subunit (EC 6.3.5.3)	35731	39456	1
38823	GCA	GCT	A	A	Yes	Phosphoribosylformylglycinamidine synthase, synthetase subunit (EC 6.3.5.3) / Phosphoribosylformylglycinamidine synthase, glutamine amidotransferase subunit (EC 6.3.5.3)	35731	39456	1
38829	ATT	ATC	I	I	Yes	Phosphoribosylformylglycinamidine synthase, synthetase subunit (EC 6.3.5.3) / Phosphoribosylformylglycinamidine synthase, glutamine amidotransferase subunit (EC 6.3.5.3)	35731	39456	1
38847	GGA	GGT	G	G	Yes	Phosphoribosylformylglycinamidine synthase, synthetase subunit (EC 6.3.5.3) / Phosphoribosylformylglycinamidine synthase, glutamine amidotransferase subunit (EC 6.3.5.3)	35731	39456	1
38865	GAA	GAG	E	E	Yes	Phosphoribosylformylglycinamidine synthase, synthetase subunit (EC 6.3.5.3) / Phosphoribosylformylglycinamidine synthase, glutamine amidotransferase subunit (EC 6.3.5.3)	35731	39456	1
38889	ATT	ATC	I	I	Yes	Phosphoribosylformylglycinamidine synthase, synthetase subunit (EC 6.3.5.3) / Phosphoribosylformylglycinamidine synthase, glutamine amidotransferase subunit (EC 6.3.5.3)	35731	39456	1
38899	TTG	CTT	L	L	Yes	Phosphoribosylformylglycinamidine synthase, synthetase subunit (EC 6.3.5.3) / Phosphoribosylformylglycinamidine synthase, glutamine amidotransferase subunit (EC 6.3.5.3)	35731	39456	1
38901	G	T	Merged with SNP 38899
38904	CTC	CTT	L	L	Yes	Phosphoribosylformylglycinamidine synthase, synthetase subunit (EC 6.3.5.3) / Phosphoribosylformylglycinamidine synthase, glutamine amidotransferase subunit (EC 6.3.5.3)	35731	39456	1
38932	GGC	AGC	G	S	No	Phosphoribosylformylglycinamidine synthase, synthetase subunit (EC 6.3.5.3) / Phosphoribosylformylglycinamidine synthase, glutamine amidotransferase subunit (EC 6.3.5.3)	35731	39456	1
39015	GGA	GGT	G	G	Yes	Phosphoribosylformylglycinamidine synthase, synthetase subunit (EC 6.3.5.3) / Phosphoribosylformylglycinamidine synthase, glutamine amidotransferase subunit (EC 6.3.5.3)	35731	39456	1
39021	TTC	TTT	F	F	Yes	Phosphoribosylformylglycinamidine synthase, synthetase subunit (EC 6.3.5.3) / Phosphoribosylformylglycinamidine synthase, glutamine amidotransferase subunit (EC 6.3.5.3)	35731	39456	1
39024	GAG	GAA	E	E	Yes	Phosphoribosylformylglycinamidine synthase, synthetase subunit (EC 6.3.5.3) / Phosphoribosylformylglycinamidine synthase, glutamine amidotransferase subunit (EC 6.3.5.3)	35731	39456	1
39639	GAC	GAT	D	D	Yes	Amidophosphoribosyltransferase (EC 2.4.2.14)	39469	40911	1
39669	AAC	AAT	N	N	Yes	Amidophosphoribosyltransferase (EC 2.4.2.14)	39469	40911	1
39717	GTT	GTG	V	V	Yes	Amidophosphoribosyltransferase (EC 2.4.2.14)	39469	40911	1
39723	TAC	TAT	Y	Y	Yes	Amidophosphoribosyltransferase (EC 2.4.2.14)	39469	40911	1
39729	ACT	ACG	T	T	Yes	Amidophosphoribosyltransferase (EC 2.4.2.14)	39469	40911	1
39747	GTG	GTT	V	V	Yes	Amidophosphoribosyltransferase (EC 2.4.2.14)	39469	40911	1
39750	GAC	GAT	D	D	Yes	Amidophosphoribosyltransferase (EC 2.4.2.14)	39469	40911	1
39795	GGC	GGA	G	G	Yes	Amidophosphoribosyltransferase (EC 2.4.2.14)	39469	40911	1
39807	AAC	AAT	N	N	Yes	Amidophosphoribosyltransferase (EC 2.4.2.14)	39469	40911	1
39825	GCC	GCA	A	A	Yes	Amidophosphoribosyltransferase (EC 2.4.2.14)	39469	40911	1
39861	GCT	GCA	A	A	Yes	Amidophosphoribosyltransferase (EC 2.4.2.14)	39469	40911	1
40038	CCC	CCA	P	P	Yes	Amidophosphoribosyltransferase (EC 2.4.2.14)	39469	40911	1
40074	GTG	GTC	V	V	Yes	Amidophosphoribosyltransferase (EC 2.4.2.14)	39469	40911	1
40125	CGC	CGT	R	R	Yes	Amidophosphoribosyltransferase (EC 2.4.2.14)	39469	40911	1
40230	TAC	TAT	Y	Y	Yes	Amidophosphoribosyltransferase (EC 2.4.2.14)	39469	40911	1
40245	GAT	GAC	D	D	Yes	Amidophosphoribosyltransferase (EC 2.4.2.14)	39469	40911	1
40257	CAC	CAT	H	H	Yes	Amidophosphoribosyltransferase (EC 2.4.2.14)	39469	40911	1
40263	GTC	GTT	V	V	Yes	Amidophosphoribosyltransferase (EC 2.4.2.14)	39469	40911	1
40318	TAC	CAC	Y	H	No	Amidophosphoribosyltransferase (EC 2.4.2.14)	39469	40911	1
40338	GTT	GTC	V	V	Yes	Amidophosphoribosyltransferase (EC 2.4.2.14)	39469	40911	1
40389	TCT	TCA	S	S	Yes	Amidophosphoribosyltransferase (EC 2.4.2.14)	39469	40911	1
40413	CTC	CTG	L	L	Yes	Amidophosphoribosyltransferase (EC 2.4.2.14)	39469	40911	1
40431	ACC	ACG	T	T	Yes	Amidophosphoribosyltransferase (EC 2.4.2.14)	39469	40911	1
40437	CGC	CGT	R	R	Yes	Amidophosphoribosyltransferase (EC 2.4.2.14)	39469	40911	1
40560	ACA	ACG	T	T	Yes	Amidophosphoribosyltransferase (EC 2.4.2.14)	39469	40911	1
40575	ATT	ATC	I	I	Yes	Amidophosphoribosyltransferase (EC 2.4.2.14)	39469	40911	1
40614	CAT	CAC	H	H	Yes	Amidophosphoribosyltransferase (EC 2.4.2.14)	39469	40911	1
40626	GGT	GGG	G	G	Yes	Amidophosphoribosyltransferase (EC 2.4.2.14)	39469	40911	1
40629	AGT	AGC	S	S	Yes	Amidophosphoribosyltransferase (EC 2.4.2.14)	39469	40911	1
40632	CCA	CCT	P	P	Yes	Amidophosphoribosyltransferase (EC 2.4.2.14)	39469	40911	1
40740	AGT	AGC	S	S	Yes	Amidophosphoribosyltransferase (EC 2.4.2.14)	39469	40911	1
40755	TCT	TCG	S	S	Yes	Amidophosphoribosyltransferase (EC 2.4.2.14)	39469	40911	1
40764	GGT	GGC	G	G	Yes	Amidophosphoribosyltransferase (EC 2.4.2.14)	39469	40911	1
40803	AAT	AAC	N	N	Yes	Amidophosphoribosyltransferase (EC 2.4.2.14)	39469	40911	1
40812	CTC	CTT	L	L	Yes	Amidophosphoribosyltransferase (EC 2.4.2.14)	39469	40911	1
40818	GTA	GTC	V	V	Yes	Amidophosphoribosyltransferase (EC 2.4.2.14)	39469	40911	1
40863	GAA	GAG	E	E	Yes	Amidophosphoribosyltransferase (EC 2.4.2.14)	39469	40911	1
40886	GAT	GGT	D	G	No	Amidophosphoribosyltransferase (EC 2.4.2.14)	39469	40911	1
40887	GAT	GAG	D	E	No	Amidophosphoribosyltransferase (EC 2.4.2.14)	39469	40911	1
40890	GAA	GAT	E	D	No	Amidophosphoribosyltransferase (EC 2.4.2.14)	39469	40911	1
40973	A	T				Intergenic region
40983	A	G				Intergenic region
41024	C	G				Intergenic region
41025	T	C				Intergenic region
41047	A	C				Intergenic region
41512	GGC	GGT	G	G	Yes	Phosphoribosylformylglycinamidine cyclo-ligase (EC 6.3.3.1)	41129	42151	1
41530	GCA	GCT	A	A	Yes	Phosphoribosylformylglycinamidine cyclo-ligase (EC 6.3.3.1)	41129	42151	1
41533	GCC	GCT	A	A	Yes	Phosphoribosylformylglycinamidine cyclo-ligase (EC 6.3.3.1)	41129	42151	1
41590	GAT	GAC	D	D	Yes	Phosphoribosylformylglycinamidine cyclo-ligase (EC 6.3.3.1)	41129	42151	1
41591	CTG	TTG	L	L	Yes	Phosphoribosylformylglycinamidine cyclo-ligase (EC 6.3.3.1)	41129	42151	1
41679	GCG	GTG	A	V	No	Phosphoribosylformylglycinamidine cyclo-ligase (EC 6.3.3.1)	41129	42151	1
41698	TCG	TCA	S	S	Yes	Phosphoribosylformylglycinamidine cyclo-ligase (EC 6.3.3.1)	41129	42151	1
41740	ACG	ACA	T	T	Yes	Phosphoribosylformylglycinamidine cyclo-ligase (EC 6.3.3.1)	41129	42151	1
41782	AAG	AAA	K	K	Yes	Phosphoribosylformylglycinamidine cyclo-ligase (EC 6.3.3.1)	41129	42151	1
41785	GAG	GAA	E	E	Yes	Phosphoribosylformylglycinamidine cyclo-ligase (EC 6.3.3.1)	41129	42151	1
41821	GCT	GCA	A	A	Yes	Phosphoribosylformylglycinamidine cyclo-ligase (EC 6.3.3.1)	41129	42151	1
41894	ATC	GTT	I	V	No	Phosphoribosylformylglycinamidine cyclo-ligase (EC 6.3.3.1)	41129	42151	1
41896	C	T	Merged with SNP 41894
41953	GTG	GTC	V	V	Yes	Phosphoribosylformylglycinamidine cyclo-ligase (EC 6.3.3.1)	41129	42151	1
41959	CCG	CCT	P	P	Yes	Phosphoribosylformylglycinamidine cyclo-ligase (EC 6.3.3.1)	41129	42151	1
41971	GCT	GCC	A	A	Yes	Phosphoribosylformylglycinamidine cyclo-ligase (EC 6.3.3.1)	41129	42151	1
41987	AAA	GAA	K	E	No	Phosphoribosylformylglycinamidine cyclo-ligase (EC 6.3.3.1)	41129	42151	1
42022	AAT	AAC	N	N	Yes	Phosphoribosylformylglycinamidine cyclo-ligase (EC 6.3.3.1)	41129	42151	1
42066	GAT	GGT	D	G	No	Phosphoribosylformylglycinamidine cyclo-ligase (EC 6.3.3.1)	41129	42151	1
42070	CGT	CGC	R	R	Yes	Phosphoribosylformylglycinamidine cyclo-ligase (EC 6.3.3.1)	41129	42151	1
42082	TTA	TTG	L	L	Yes	Phosphoribosylformylglycinamidine cyclo-ligase (EC 6.3.3.1)	41129	42151	1
42083	CTG	TTG	L	L	Yes	Phosphoribosylformylglycinamidine cyclo-ligase (EC 6.3.3.1)	41129	42151	1
42204	GCT	GCC	A	A	Yes	Phosphoribosylglycinamide formyltransferase (EC 2.1.2.2)	42148	42699	1
42222	GAG	GAA	E	E	Yes	Phosphoribosylglycinamide formyltransferase (EC 2.1.2.2)	42148	42699	1
42780	CAG	TAG	Q	*	No	acetyltransferase, GNAT family	42744	43208	1
42806	TCA	TCT	S	S	Yes	acetyltransferase, GNAT family	42744	43208	1
42826	CGT	CAT	R	H	No	acetyltransferase, GNAT family	42744	43208	1
42833	GTA	GTG	V	V	Yes	acetyltransferase, GNAT family	42744	43208	1
42845	GTG	GTA	V	V	Yes	acetyltransferase, GNAT family	42744	43208	1
42848	CGC	CGT	R	R	Yes	acetyltransferase, GNAT family	42744	43208	1
42954	AAT	GAT	N	D	No	acetyltransferase, GNAT family	42744	43208	1
43052	GCT	GCC	A	A	Yes	acetyltransferase, GNAT family	42744	43208	1
43069	TAC	TGC	Y	C	No	acetyltransferase, GNAT family	42744	43208	1
43081	ATC	ACC	I	T	No	acetyltransferase, GNAT family	42744	43208	1
43128	AGT	GGT	S	G	No	acetyltransferase, GNAT family	42744	43208	1
43148	ACA	ACG	T	T	Yes	acetyltransferase, GNAT family	42744	43208	1
43150	GGA	GAA	G	E	No	acetyltransferase, GNAT family	42744	43208	1
43302	TCA	TCG	S	S	Yes	IMP cyclohydrolase (EC 3.5.4.10) / Phosphoribosylaminoimidazolecarboxamide formyltransferase (EC 2.1.2.3)	43210	44757	1
43321	GCC	ACC	A	T	No	IMP cyclohydrolase (EC 3.5.4.10) / Phosphoribosylaminoimidazolecarboxamide formyltransferase (EC 2.1.2.3)	43210	44757	1
43329	GAC	GAT	D	D	Yes	IMP cyclohydrolase (EC 3.5.4.10) / Phosphoribosylaminoimidazolecarboxamide formyltransferase (EC 2.1.2.3)	43210	44757	1
43353	GCG	GCA	A	A	Yes	IMP cyclohydrolase (EC 3.5.4.10) / Phosphoribosylaminoimidazolecarboxamide formyltransferase (EC 2.1.2.3)	43210	44757	1
43587	GGG	GGT	G	G	Yes	IMP cyclohydrolase (EC 3.5.4.10) / Phosphoribosylaminoimidazolecarboxamide formyltransferase (EC 2.1.2.3)	43210	44757	1
44011	TCA	CCA	S	P	No	IMP cyclohydrolase (EC 3.5.4.10) / Phosphoribosylaminoimidazolecarboxamide formyltransferase (EC 2.1.2.3)	43210	44757	1
44109	GTG	GTA	V	V	Yes	IMP cyclohydrolase (EC 3.5.4.10) / Phosphoribosylaminoimidazolecarboxamide formyltransferase (EC 2.1.2.3)	43210	44757	1
44124	GGA	GGG	G	G	Yes	IMP cyclohydrolase (EC 3.5.4.10) / Phosphoribosylaminoimidazolecarboxamide formyltransferase (EC 2.1.2.3)	43210	44757	1
44136	CTC	CTT	L	L	Yes	IMP cyclohydrolase (EC 3.5.4.10) / Phosphoribosylaminoimidazolecarboxamide formyltransferase (EC 2.1.2.3)	43210	44757	1
44193	ATC	ATT	I	I	Yes	IMP cyclohydrolase (EC 3.5.4.10) / Phosphoribosylaminoimidazolecarboxamide formyltransferase (EC 2.1.2.3)	43210	44757	1
44893	GTC	ATC	V	I	No	Phosphoribosylamine--glycine ligase (EC 6.3.4.13)	44878	46143	1
44901	TCT	TCG	S	S	Yes	Phosphoribosylamine--glycine ligase (EC 6.3.4.13)	44878	46143	1
44931	AAA	AAG	K	K	Yes	Phosphoribosylamine--glycine ligase (EC 6.3.4.13)	44878	46143	1
44940	GAA	GAG	E	E	Yes	Phosphoribosylamine--glycine ligase (EC 6.3.4.13)	44878	46143	1
49167	CGT	CGC	R	R	Yes	Adenylosuccinate lyase (EC 4.3.2.2)	49021	50319	1
49170	GAA	GAG	E	E	Yes	Adenylosuccinate lyase (EC 4.3.2.2)	49021	50319	1
49176	GCT	GCG	A	A	Yes	Adenylosuccinate lyase (EC 4.3.2.2)	49021	50319	1
49212	CAA	CAG	Q	Q	Yes	Adenylosuccinate lyase (EC 4.3.2.2)	49021	50319	1
49221	CGT	CGC	R	R	Yes	Adenylosuccinate lyase (EC 4.3.2.2)	49021	50319	1
49320	ACT	ACG	T	T	Yes	Adenylosuccinate lyase (EC 4.3.2.2)	49021	50319	1
49335	CTC	CTT	L	L	Yes	Adenylosuccinate lyase (EC 4.3.2.2)	49021	50319	1
51139	ACC	ACG	T	T	Yes	Beta-hexosaminidase (EC 3.2.1.52)	50374	54405	-1
51337	CTC	CTT	L	L	Yes	Beta-hexosaminidase (EC 3.2.1.52)	50374	54405	-1
52768	GTC	GTA	V	V	Yes	Beta-hexosaminidase (EC 3.2.1.52)	50374	54405	-1
52774	GCG	GCA	A	A	Yes	Beta-hexosaminidase (EC 3.2.1.52)	50374	54405	-1
52798	AAC	AAT	N	N	Yes	Beta-hexosaminidase (EC 3.2.1.52)	50374	54405	-1
52813	GTC	GTA	V	V	Yes	Beta-hexosaminidase (EC 3.2.1.52)	50374	54405	-1
52846	GAC	GAT	D	D	Yes	Beta-hexosaminidase (EC 3.2.1.52)	50374	54405	-1
52849	GCC	GCT	A	A	Yes	Beta-hexosaminidase (EC 3.2.1.52)	50374	54405	-1
52852	GCT	GCA	A	A	Yes	Beta-hexosaminidase (EC 3.2.1.52)	50374	54405	-1
52855	TTT	TTC	F	F	Yes	Beta-hexosaminidase (EC 3.2.1.52)	50374	54405	-1
52957	GGG	GGA	G	G	Yes	Beta-hexosaminidase (EC 3.2.1.52)	50374	54405	-1
52978	GGA	GGG	G	G	Yes	Beta-hexosaminidase (EC 3.2.1.52)	50374	54405	-1
53050	GGA	GGC	G	G	Yes	Beta-hexosaminidase (EC 3.2.1.52)	50374	54405	-1
53191	GAT	GAC	D	D	Yes	Beta-hexosaminidase (EC 3.2.1.52)	50374	54405	-1
53212	AGC	AGT	S	S	Yes	Beta-hexosaminidase (EC 3.2.1.52)	50374	54405	-1
53227	TAT	TAC	Y	Y	Yes	Beta-hexosaminidase (EC 3.2.1.52)	50374	54405	-1
53239	GAT	GAC	D	D	Yes	Beta-hexosaminidase (EC 3.2.1.52)	50374	54405	-1
53248	GCC	GCT	A	A	Yes	Beta-hexosaminidase (EC 3.2.1.52)	50374	54405	-1
53314	GAC	GAT	D	D	Yes	Beta-hexosaminidase (EC 3.2.1.52)	50374	54405	-1
53353	AAG	AAA	K	K	Yes	Beta-hexosaminidase (EC 3.2.1.52)	50374	54405	-1
53386	AAC	GAT	N	D	No	Beta-hexosaminidase (EC 3.2.1.52)	50374	54405	-1
53388	T	C	Merged with SNP 53386
53422	AAT	AAC	N	N	Yes	Beta-hexosaminidase (EC 3.2.1.52)	50374	54405	-1
53446	TTC	TTT	F	F	Yes	Beta-hexosaminidase (EC 3.2.1.52)	50374	54405	-1
53719	ACT	ACC	T	T	Yes	Beta-hexosaminidase (EC 3.2.1.52)	50374	54405	-1
53749	GAC	GAT	D	D	Yes	Beta-hexosaminidase (EC 3.2.1.52)	50374	54405	-1
53773	GCG	GCC	A	A	Yes	Beta-hexosaminidase (EC 3.2.1.52)	50374	54405	-1
54477	A	G				Intergenic region
54518	A	G				Intergenic region
54526	T	A				Intergenic region
54591	C	A				Intergenic region
54639	C	T				Intergenic region
54646	C	A				Intergenic region
54675	T	C				Intergenic region
54687	A	G				Intergenic region
54876	ACT	ACA	T	T	Yes	Transcriptional regulator, GntR family	54708	55424	-1
55038	GTG	GTA	V	V	Yes	Transcriptional regulator, GntR family	54708	55424	-1
55041	GAT	GAC	D	D	Yes	Transcriptional regulator, GntR family	54708	55424	-1
55131	GAA	GAG	E	E	Yes	Transcriptional regulator, GntR family	54708	55424	-1
55155	GAC	GAT	D	D	Yes	Transcriptional regulator, GntR family	54708	55424	-1
55179	GTT	GTC	V	V	Yes	Transcriptional regulator, GntR family	54708	55424	-1
55209	CGT	CGC	R	R	Yes	Transcriptional regulator, GntR family	54708	55424	-1
55230	GGA	GGT	G	G	Yes	Transcriptional regulator, GntR family	54708	55424	-1
55245	CGT	CGC	R	R	Yes	Transcriptional regulator, GntR family	54708	55424	-1
55254	TAT	TAC	Y	Y	Yes	Transcriptional regulator, GntR family	54708	55424	-1
55413	CCA	CCT	P	P	Yes	Transcriptional regulator, GntR family	54708	55424	-1
55651	G	T				Intergenic region
55695	T	G				Intergenic region
56025	CCA	CCG	P	P	Yes	Beta-galactosidase 3	55747	57534	1
56076	ACA	ACC	T	T	Yes	Beta-galactosidase 3	55747	57534	1
56178	AAT	AAC	N	N	Yes	Beta-galactosidase 3	55747	57534	1
56181	GGT	GGC	G	G	Yes	Beta-galactosidase 3	55747	57534	1
56193	CTT	CTC	L	L	Yes	Beta-galactosidase 3	55747	57534	1
56265	TTG	TTA	L	L	Yes	Beta-galactosidase 3	55747	57534	1
56346	ATC	ATT	I	I	Yes	Beta-galactosidase 3	55747	57534	1
56379	GGC	GGT	G	G	Yes	Beta-galactosidase 3	55747	57534	1
56505	ACA	ACT	T	T	Yes	Beta-galactosidase 3	55747	57534	1
56508	CGG	CGT	R	R	Yes	Beta-galactosidase 3	55747	57534	1
56586	GGA	GGT	G	G	Yes	Beta-galactosidase 3	55747	57534	1
56640	CCA	CCG	P	P	Yes	Beta-galactosidase 3	55747	57534	1
56652	TCA	TCT	S	S	Yes	Beta-galactosidase 3	55747	57534	1
56742	GAT	GAG	D	E	No	Beta-galactosidase 3	55747	57534	1
56826	ACT	ACC	T	T	Yes	Beta-galactosidase 3	55747	57534	1
56834	AGT	AAT	S	N	No	Beta-galactosidase 3	55747	57534	1
56915	AAT	ACT	N	T	No	Beta-galactosidase 3	55747	57534	1
56916	AAT	AAG	N	K	No	Beta-galactosidase 3	55747	57534	1
56940	GAA	GAG	E	E	Yes	Beta-galactosidase 3	55747	57534	1
56979	CAG	CAA	Q	Q	Yes	Beta-galactosidase 3	55747	57534	1
57027	ATA	ATT	I	I	Yes	Beta-galactosidase 3	55747	57534	1
57030	GGT	GGC	G	G	Yes	Beta-galactosidase 3	55747	57534	1
57036	GAT	GAC	D	D	Yes	Beta-galactosidase 3	55747	57534	1
57114	GGT	GGA	G	G	Yes	Beta-galactosidase 3	55747	57534	1
57123	TTC	TTT	F	F	Yes	Beta-galactosidase 3	55747	57534	1
57138	CAA	CAG	Q	Q	Yes	Beta-galactosidase 3	55747	57534	1
57153	CGT	CGA	R	R	Yes	Beta-galactosidase 3	55747	57534	1
57228	AAA	AAG	K	K	Yes	Beta-galactosidase 3	55747	57534	1
57261	CAG	CAA	Q	Q	Yes	Beta-galactosidase 3	55747	57534	1
57288	ACG	ACT	T	T	Yes	Beta-galactosidase 3	55747	57534	1
57291	GTC	GTT	V	V	Yes	Beta-galactosidase 3	55747	57534	1
57364	TTA	CTA	L	L	Yes	Beta-galactosidase 3	55747	57534	1
57369	GGA	GGG	G	G	Yes	Beta-galactosidase 3	55747	57534	1
57417	AGC	AGT	S	S	Yes	Beta-galactosidase 3	55747	57534	1
57486	CAT	CAC	H	H	Yes	Beta-galactosidase 3	55747	57534	1
57893	AAC	AAT	N	N	Yes	Predicted PTS system, galactosamine-specific IIB component (EC 2.7.1.69)	57531	58007	1
58043	TGG	CCG	W	P	No	Predicted PTS system, galactosamine-specific IIC component (EC 2.7.1.69)	58034	58939	1
58044	G	C	Merged with SNP 58043
58153	TTG	TTA	L	L	Yes	Predicted PTS system, galactosamine-specific IIC component (EC 2.7.1.69)	58034	58939	1
58228	TTT	TTC	F	F	Yes	Predicted PTS system, galactosamine-specific IIC component (EC 2.7.1.69)	58034	58939	1
58309	GAT	GAC	D	D	Yes	Predicted PTS system, galactosamine-specific IIC component (EC 2.7.1.69)	58034	58939	1
58342	GCA	GCG	A	A	Yes	Predicted PTS system, galactosamine-specific IIC component (EC 2.7.1.69)	58034	58939	1
58466	ATT	CTT	I	L	No	Predicted PTS system, galactosamine-specific IIC component (EC 2.7.1.69)	58034	58939	1
58507	GCC	GCT	A	A	Yes	Predicted PTS system, galactosamine-specific IIC component (EC 2.7.1.69)	58034	58939	1
58516	TTC	TTT	F	F	Yes	Predicted PTS system, galactosamine-specific IIC component (EC 2.7.1.69)	58034	58939	1
58585	ACT	ACA	T	T	Yes	Predicted PTS system, galactosamine-specific IIC component (EC 2.7.1.69)	58034	58939	1
58618	TTC	TTT	F	F	Yes	Predicted PTS system, galactosamine-specific IIC component (EC 2.7.1.69)	58034	58939	1
58621	GCT	GCA	A	A	Yes	Predicted PTS system, galactosamine-specific IIC component (EC 2.7.1.69)	58034	58939	1
58834	GTG	GTA	V	V	Yes	Predicted PTS system, galactosamine-specific IIC component (EC 2.7.1.69)	58034	58939	1
58849	GCA	GCG	A	A	Yes	Predicted PTS system, galactosamine-specific IIC component (EC 2.7.1.69)	58034	58939	1
58921	ATC	ATT	I	I	Yes	Predicted PTS system, galactosamine-specific IIC component (EC 2.7.1.69)	58034	58939	1
58947	CTA	TTA	L	L	Yes	Predicted PTS system, galactosamine-specific IID component (EC 2.7.1.69)	58926	59747	1
58973	ATC	ATT	I	I	Yes	Predicted PTS system, galactosamine-specific IID component (EC 2.7.1.69)	58926	59747	1
58991	TTT	TTC	F	F	Yes	Predicted PTS system, galactosamine-specific IID component (EC 2.7.1.69)	58926	59747	1
59003	TTA	TTG	L	L	Yes	Predicted PTS system, galactosamine-specific IID component (EC 2.7.1.69)	58926	59747	1
59006	GGT	GGA	G	G	Yes	Predicted PTS system, galactosamine-specific IID component (EC 2.7.1.69)	58926	59747	1
59030	GCT	GCA	A	A	Yes	Predicted PTS system, galactosamine-specific IID component (EC 2.7.1.69)	58926	59747	1
59033	TCT	TCA	S	S	Yes	Predicted PTS system, galactosamine-specific IID component (EC 2.7.1.69)	58926	59747	1
59078	GGG	GGA	G	G	Yes	Predicted PTS system, galactosamine-specific IID component (EC 2.7.1.69)	58926	59747	1
59093	GAA	GAG	E	E	Yes	Predicted PTS system, galactosamine-specific IID component (EC 2.7.1.69)	58926	59747	1
59132	AAT	AAC	N	N	Yes	Predicted PTS system, galactosamine-specific IID component (EC 2.7.1.69)	58926	59747	1
59153	ACT	ACA	T	T	Yes	Predicted PTS system, galactosamine-specific IID component (EC 2.7.1.69)	58926	59747	1
59177	GCC	GCT	A	A	Yes	Predicted PTS system, galactosamine-specific IID component (EC 2.7.1.69)	58926	59747	1
59195	GGT	GGC	G	G	Yes	Predicted PTS system, galactosamine-specific IID component (EC 2.7.1.69)	58926	59747	1
59198	GTG	GTT	V	V	Yes	Predicted PTS system, galactosamine-specific IID component (EC 2.7.1.69)	58926	59747	1
59213	GCC	GCG	A	A	Yes	Predicted PTS system, galactosamine-specific IID component (EC 2.7.1.69)	58926	59747	1
59309	GCA	GCT	A	A	Yes	Predicted PTS system, galactosamine-specific IID component (EC 2.7.1.69)	58926	59747	1
59396	CAA	CAG	Q	Q	Yes	Predicted PTS system, galactosamine-specific IID component (EC 2.7.1.69)	58926	59747	1
59408	GCC	GCA	A	A	Yes	Predicted PTS system, galactosamine-specific IID component (EC 2.7.1.69)	58926	59747	1
59468	GAT	GAA	D	E	No	Predicted PTS system, galactosamine-specific IID component (EC 2.7.1.69)	58926	59747	1
59489	GTC	GTA	V	V	Yes	Predicted PTS system, galactosamine-specific IID component (EC 2.7.1.69)	58926	59747	1
59531	GAG	GAA	E	E	Yes	Predicted PTS system, galactosamine-specific IID component (EC 2.7.1.69)	58926	59747	1
59537	TCT	TCA	S	S	Yes	Predicted PTS system, galactosamine-specific IID component (EC 2.7.1.69)	58926	59747	1
59603	CGC	CGT	R	R	Yes	Predicted PTS system, galactosamine-specific IID component (EC 2.7.1.69)	58926	59747	1
59621	TTT	TTC	F	F	Yes	Predicted PTS system, galactosamine-specific IID component (EC 2.7.1.69)	58926	59747	1
59627	GCC	GCA	A	A	Yes	Predicted PTS system, galactosamine-specific IID component (EC 2.7.1.69)	58926	59747	1
60502	GAA	GAG	E	E	Yes	Galactosamine-6-phosphate isomerase (EC 5.3.1.-)	60413	61579	1
60523	GCG	GCA	A	A	Yes	Galactosamine-6-phosphate isomerase (EC 5.3.1.-)	60413	61579	1
60529	CGG	CGT	R	R	Yes	Galactosamine-6-phosphate isomerase (EC 5.3.1.-)	60413	61579	1
60559	ATT	ATC	I	I	Yes	Galactosamine-6-phosphate isomerase (EC 5.3.1.-)	60413	61579	1
60562	GCG	GCT	A	A	Yes	Galactosamine-6-phosphate isomerase (EC 5.3.1.-)	60413	61579	1
60568	AAA	AAG	K	K	Yes	Galactosamine-6-phosphate isomerase (EC 5.3.1.-)	60413	61579	1
60595	ACA	ACG	T	T	Yes	Galactosamine-6-phosphate isomerase (EC 5.3.1.-)	60413	61579	1
60604	GGG	GGT	G	G	Yes	Galactosamine-6-phosphate isomerase (EC 5.3.1.-)	60413	61579	1
60634	GTG	GTA	V	V	Yes	Galactosamine-6-phosphate isomerase (EC 5.3.1.-)	60413	61579	1
60635	TCT	CCA	S	P	No	Galactosamine-6-phosphate isomerase (EC 5.3.1.-)	60413	61579	1
60637	T	A	Merged with SNP 60635
60658	GAC	GAT	D	D	Yes	Galactosamine-6-phosphate isomerase (EC 5.3.1.-)	60413	61579	1
60769	GGA	GGG	G	G	Yes	Galactosamine-6-phosphate isomerase (EC 5.3.1.-)	60413	61579	1
60790	GCA	GCG	A	A	Yes	Galactosamine-6-phosphate isomerase (EC 5.3.1.-)	60413	61579	1
60805	GCT	GCC	A	A	Yes	Galactosamine-6-phosphate isomerase (EC 5.3.1.-)	60413	61579	1
60817	GTG	GTT	V	V	Yes	Galactosamine-6-phosphate isomerase (EC 5.3.1.-)	60413	61579	1
60958	ACA	ACG	T	T	Yes	Galactosamine-6-phosphate isomerase (EC 5.3.1.-)	60413	61579	1
60965	CTG	ATG	L	M	No	Galactosamine-6-phosphate isomerase (EC 5.3.1.-)	60413	61579	1
60985	GTC	GTT	V	V	Yes	Galactosamine-6-phosphate isomerase (EC 5.3.1.-)	60413	61579	1
61177	ACA	ACT	T	T	Yes	Galactosamine-6-phosphate isomerase (EC 5.3.1.-)	60413	61579	1
61246	AAC	AAT	N	N	Yes	Galactosamine-6-phosphate isomerase (EC 5.3.1.-)	60413	61579	1
61333	GAC	GAT	D	D	Yes	Galactosamine-6-phosphate isomerase (EC 5.3.1.-)	60413	61579	1
61351	GTC	GTT	V	V	Yes	Galactosamine-6-phosphate isomerase (EC 5.3.1.-)	60413	61579	1
61399	GTA	GTG	V	V	Yes	Galactosamine-6-phosphate isomerase (EC 5.3.1.-)	60413	61579	1
61441	GTT	GTC	V	V	Yes	Galactosamine-6-phosphate isomerase (EC 5.3.1.-)	60413	61579	1
61462	GCT	GCC	A	A	Yes	Galactosamine-6-phosphate isomerase (EC 5.3.1.-)	60413	61579	1
61555	GTG	GTT	V	V	Yes	Galactosamine-6-phosphate isomerase (EC 5.3.1.-)	60413	61579	1
61576	AAG	AAA	K	K	Yes	Galactosamine-6-phosphate isomerase (EC 5.3.1.-)	60413	61579	1
61586	G	A				Intergenic region
62748	GAA	GAG	E	E	Yes	Aldose 1-epimerase (EC 5.1.3.3)	62731	63768	1
62787	GCT	GCC	A	A	Yes	Aldose 1-epimerase (EC 5.1.3.3)	62731	63768	1
62982	GGT	GGA	G	G	Yes	Aldose 1-epimerase (EC 5.1.3.3)	62731	63768	1
62994	GAG	GAA	E	E	Yes	Aldose 1-epimerase (EC 5.1.3.3)	62731	63768	1
63013	AAT	GAC	N	D	No	Aldose 1-epimerase (EC 5.1.3.3)	62731	63768	1
63015	T	C	Merged with SNP 63013
63030	AAC	AAT	N	N	Yes	Aldose 1-epimerase (EC 5.1.3.3)	62731	63768	1
63072	TCG	TCC	S	S	Yes	Aldose 1-epimerase (EC 5.1.3.3)	62731	63768	1
63273	AAC	AAT	N	N	Yes	Aldose 1-epimerase (EC 5.1.3.3)	62731	63768	1
63920	GCG	GCT	A	A	Yes	Glyoxalase family protein	63879	64733	1
63938	GAT	GAC	D	D	Yes	Glyoxalase family protein	63879	64733	1
63968	CAA	CAG	Q	Q	Yes	Glyoxalase family protein	63879	64733	1
64022	CTT	CTC	L	L	Yes	Glyoxalase family protein	63879	64733	1
64062	TCT	GCT	S	A	No	Glyoxalase family protein	63879	64733	1
64098	CTG	TTG	L	L	Yes	Glyoxalase family protein	63879	64733	1
64107	CTG	TTG	L	L	Yes	Glyoxalase family protein	63879	64733	1
64157	GAT	GAC	D	D	Yes	Glyoxalase family protein	63879	64733	1
64178	GGG	GGA	G	G	Yes	Glyoxalase family protein	63879	64733	1
64262	GTG	GTA	V	V	Yes	Glyoxalase family protein	63879	64733	1
64279	CTA	CGA	L	R	No	Glyoxalase family protein	63879	64733	1
64310	GAG	GAA	E	E	Yes	Glyoxalase family protein	63879	64733	1
64352	GTA	GTG	V	V	Yes	Glyoxalase family protein	63879	64733	1
64457	GAG	GAA	E	E	Yes	Glyoxalase family protein	63879	64733	1
64541	AAG	AAA	K	K	Yes	Glyoxalase family protein	63879	64733	1
64545	CTA	TTG	L	L	Yes	Glyoxalase family protein	63879	64733	1
64547	A	G	Merged with SNP 64545
65352	GTC	GTT	V	V	Yes	hypothetical protein	65047	65619	1
65370	AAT	AAC	N	N	Yes	hypothetical protein	65047	65619	1
65379	ACA	ACC	T	T	Yes	hypothetical protein	65047	65619	1
65394	TCA	TCT	S	S	Yes	hypothetical protein	65047	65619	1
65651	AAC	TGC	N	C	No	FIG01117398: hypothetical protein	65621	66289	1
65652	A	G	Merged with SNP 65651
65679	AGG	AAG	R	K	No	FIG01117398: hypothetical protein	65621	66289	1
65710	AGT	AGC	S	S	Yes	FIG01117398: hypothetical protein	65621	66289	1
65734	GCT	GCC	A	A	Yes	FIG01117398: hypothetical protein	65621	66289	1
65777	GCT	ATT	A	I	No	FIG01117398: hypothetical protein	65621	66289	1
65778	C	T	Merged with SNP 65777
65814	CTT	CGT	L	R	No	FIG01117398: hypothetical protein	65621	66289	1
65827	GCG	GCA	A	A	Yes	FIG01117398: hypothetical protein	65621	66289	1
65852	ATG	GCA	M	A	No	FIG01117398: hypothetical protein	65621	66289	1
65853	T	C	Merged with SNP 65852
65854	G	A	Merged with SNP 65852
65904	GAA	GGA	E	G	No	FIG01117398: hypothetical protein	65621	66289	1
65971	GAT	GAA	D	E	No	FIG01117398: hypothetical protein	65621	66289	1
66058	CTT	CTC	L	L	Yes	FIG01117398: hypothetical protein	65621	66289	1
66106	GGG	GGA	G	G	Yes	FIG01117398: hypothetical protein	65621	66289	1
66388	A	G				Intergenic region
66392	A	G				Intergenic region
66503	GCA	GCC	A	A	Yes	FIG01117398: hypothetical protein	66411	67082	1
66893	GGT	GGC	G	G	Yes	FIG01117398: hypothetical protein	66411	67082	1
67348	CCC	CCT	P	P	Yes	hypothetical protein	67085	67747	1
67352	GCT	ACT	A	T	No	hypothetical protein	67085	67747	1
67360	GCT	GCC	A	A	Yes	hypothetical protein	67085	67747	1
67372	ACT	ACC	T	T	Yes	hypothetical protein	67085	67747	1
67381	GGC	GGT	G	G	Yes	hypothetical protein	67085	67747	1
67403	CTG	TTG	L	L	Yes	hypothetical protein	67085	67747	1
67449	GAC	GTC	D	V	No	hypothetical protein	67085	67747	1
67462	AAG	AAT	K	N	No	hypothetical protein	67085	67747	1
67502	CCT	TCT	P	S	No	hypothetical protein	67085	67747	1
67533	ATG	AAG	M	K	No	hypothetical protein	67085	67747	1
67536	ATC	ACC	I	T	No	hypothetical protein	67085	67747	1
67559	TCG	CCG	S	P	No	hypothetical protein	67085	67747	1
67627	AGT	AGC	S	S	Yes	hypothetical protein	67085	67747	1
67781	C	A				Intergenic region
67787	G	A				Intergenic region
67788	G	A				Intergenic region
67837	GTG	GTA	V	V	Yes	hypothetical protein	67823	68380	1
67903	CTT	CTC	L	L	Yes	hypothetical protein	67823	68380	1
67905	TTC	TAC	F	Y	No	hypothetical protein	67823	68380	1
67906	TTC	TTT	F	F	Yes	hypothetical protein	67823	68380	1
67918	CGG	CGA	R	R	Yes	hypothetical protein	67823	68380	1
67936	CGC	CGT	R	R	Yes	hypothetical protein	67823	68380	1
68030	TCT	GCT	S	A	No	hypothetical protein	67823	68380	1
68069	GTC	ATC	V	I	No	hypothetical protein	67823	68380	1
68128	CTG	CTA	L	L	Yes	hypothetical protein	67823	68380	1
68131	GCC	GCG	A	A	Yes	hypothetical protein	67823	68380	1
68209	GAG	GAA	E	E	Yes	hypothetical protein	67823	68380	1
68215	ACA	ACG	T	T	Yes	hypothetical protein	67823	68380	1
68347	GCC	GCA	A	A	Yes	hypothetical protein	67823	68380	1
68453	A	G				Intergenic region
68472	A	T				Intergenic region
68485	G	A				Intergenic region
68487	G	A				Intergenic region
68600	ATC	ATA	I	I	Yes	FIG01117137: hypothetical protein	68580	68837	1
68624	GGC	GGT	G	G	Yes	FIG01117137: hypothetical protein	68580	68837	1
68756	TGC	TGT	C	C	Yes	FIG01117137: hypothetical protein	68580	68837	1
68769	TTA	CTA	L	L	Yes	FIG01117137: hypothetical protein	68580	68837	1
68774	GAT	GAC	D	D	Yes	FIG01117137: hypothetical protein	68580	68837	1
68831	CGG	CGA	R	R	Yes	FIG01117137: hypothetical protein	68580	68837	1
68834	AAG	AAA	K	K	Yes	FIG01117137: hypothetical protein	68580	68837	1
68853	A	C				Intergenic region
68872	T	G				Intergenic region
68889	A	G				Intergenic region
68895	A	G				Intergenic region
68906	A	G				Intergenic region
68908	A	C				Intergenic region
68969	T	C				Intergenic region
69040	G	T				Intergenic region
69041	A	T				Intergenic region
69042	A	T				Intergenic region
69231	CCG	CCT	P	P	Yes	Rhodanese-like domain protein	69060	69356	-1
69234	CTT	CTG	L	L	Yes	Rhodanese-like domain protein	69060	69356	-1
69241	AGA	AAA	R	K	No	Rhodanese-like domain protein	69060	69356	-1
69243	GCA	GCT	A	A	Yes	Rhodanese-like domain protein	69060	69356	-1
69246	GGA	GGT	G	G	Yes	Rhodanese-like domain protein	69060	69356	-1
69279	GAG	GAA	E	E	Yes	Rhodanese-like domain protein	69060	69356	-1
69297	AAC	AAT	N	N	Yes	Rhodanese-like domain protein	69060	69356	-1
69389	CTA	CAA	L	Q	No	FIG01114933: hypothetical protein	69331	69516	-1
69479	AGC	AAC	S	N	No	FIG01114933: hypothetical protein	69331	69516	-1
69492	GCC	ACC	A	T	No	FIG01114933: hypothetical protein	69331	69516	-1
69565	A	C				Intergenic region
69568	T	C				Intergenic region
69588	G	A				Intergenic region
69593	C	T				Intergenic region
69607	A	T				Intergenic region
69610	T	G				Intergenic region
69652	G	A				Intergenic region
69745	GTT	GTC	V	V	Yes	Rhodanese-like	69706	70011	-1
69775	CTT	CTA	L	L	Yes	Rhodanese-like	69706	70011	-1
69779	ATG	AAG	M	K	No	Rhodanese-like	69706	70011	-1
69802	GTA	GTG	V	V	Yes	Rhodanese-like	69706	70011	-1
69811	CAC	CAT	H	H	Yes	Rhodanese-like	69706	70011	-1
69820	GTC	GTT	V	V	Yes	Rhodanese-like	69706	70011	-1
69826	CTT	CTC	L	L	Yes	Rhodanese-like	69706	70011	-1
69883	GCC	GCA	A	A	Yes	Rhodanese-like	69706	70011	-1
69898	GGT	GGC	G	G	Yes	Rhodanese-like	69706	70011	-1
69931	CTA	CTG	L	L	Yes	Rhodanese-like	69706	70011	-1
70458	TGC	TGT	C	C	Yes	Maltose O-acetyltransferase (EC 2.3.1.79)	70186	70749	1
70614	GTC	GTT	V	V	Yes	Maltose O-acetyltransferase (EC 2.3.1.79)	70186	70749	1
70626	GTG	GTA	V	V	Yes	Maltose O-acetyltransferase (EC 2.3.1.79)	70186	70749	1
70641	AAC	AAT	N	N	Yes	Maltose O-acetyltransferase (EC 2.3.1.79)	70186	70749	1
70649	GCA	GTA	A	V	No	Maltose O-acetyltransferase (EC 2.3.1.79)	70186	70749	1
70656	GCG	GCA	A	A	Yes	Maltose O-acetyltransferase (EC 2.3.1.79)	70186	70749	1
70704	GGC	GGG	G	G	Yes	Maltose O-acetyltransferase (EC 2.3.1.79)	70186	70749	1
70719	GTC	GTT	V	V	Yes	Maltose O-acetyltransferase (EC 2.3.1.79)	70186	70749	1
70924	A	G				Intergenic region
72639	T	G				Intergenic region
72659	C	T				Intergenic region
72660	C	T				Intergenic region
72661	C	A				Intergenic region
72669	T	A				Intergenic region
72693	TTG	TTA	L	L	Yes	Methionine ABC transporter ATP-binding protein	72682	73398	1
72729	CAA	CAT	Q	H	No	Methionine ABC transporter ATP-binding protein	72682	73398	1
72767	CTA	CCA	L	P	No	Methionine ABC transporter ATP-binding protein	72682	73398	1
72895	TAT	CAT	Y	H	No	Methionine ABC transporter ATP-binding protein	72682	73398	1
72909	GAC	GAT	D	D	Yes	Methionine ABC transporter ATP-binding protein	72682	73398	1
72915	GGT	GGC	G	G	Yes	Methionine ABC transporter ATP-binding protein	72682	73398	1
72927	CAG	CAA	Q	Q	Yes	Methionine ABC transporter ATP-binding protein	72682	73398	1
73011	CTG	CTA	L	L	Yes	Methionine ABC transporter ATP-binding protein	72682	73398	1
73251	ACT	ACC	T	T	Yes	Methionine ABC transporter ATP-binding protein	72682	73398	1
73275	TTA	TTG	L	L	Yes	Methionine ABC transporter ATP-binding protein	72682	73398	1
73302	GGT	GGC	G	G	Yes	Methionine ABC transporter ATP-binding protein	72682	73398	1
73325	ATA	ACA	I	T	No	Methionine ABC transporter ATP-binding protein	72682	73398	1
73380	TTG	TTA	L	L	Yes	Methionine ABC transporter ATP-binding protein	72682	73398	1
73392	GGA	GGT	G	G	Yes	Methionine ABC transporter ATP-binding protein	72682	73398	1
73399	G	A				Intergenic region
73408	ACC	ACA	T	T	Yes	ABC transporter permease protein	73400	74482	1
73411	ATT	ATA	I	I	Yes	ABC transporter permease protein	73400	74482	1
73414	GCT	GCG	A	A	Yes	ABC transporter permease protein	73400	74482	1
73486	GTA	GTT	V	V	Yes	ABC transporter permease protein	73400	74482	1
73492	ATT	ATC	I	I	Yes	ABC transporter permease protein	73400	74482	1
73535	AAT	GAT	N	D	No	ABC transporter permease protein	73400	74482	1
73549	GCG	GCA	A	A	Yes	ABC transporter permease protein	73400	74482	1
73555	CAA	CAG	Q	Q	Yes	ABC transporter permease protein	73400	74482	1
73633	CAG	CAA	Q	Q	Yes	ABC transporter permease protein	73400	74482	1
73639	AAG	AAA	K	K	Yes	ABC transporter permease protein	73400	74482	1
74020	CGT	CGA	R	R	Yes	ABC transporter permease protein	73400	74482	1
74029	ATT	ATC	I	I	Yes	ABC transporter permease protein	73400	74482	1
74245	CTT	CTC	L	L	Yes	ABC transporter permease protein	73400	74482	1
74293	TCA	TCC	S	S	Yes	ABC transporter permease protein	73400	74482	1
74310	CTA	CCA	L	P	No	ABC transporter permease protein	73400	74482	1
74377	GGA	GGG	G	G	Yes	ABC transporter permease protein	73400	74482	1
74399	CCA	TCA	P	S	No	ABC transporter permease protein	73400	74482	1
74420	ATT	GTT	I	V	No	ABC transporter permease protein	73400	74482	1
74446	CTC	CTT	L	L	Yes	ABC transporter permease protein	73400	74482	1
74683	CAG	CAA	Q	Q	Yes	transcriptional regulator, TetR family	74522	75145	1
74720	CTA	TTA	L	L	Yes	transcriptional regulator, TetR family	74522	75145	1
74764	GGT	GGC	G	G	Yes	transcriptional regulator, TetR family	74522	75145	1
74827	CAC	CAT	H	H	Yes	transcriptional regulator, TetR family	74522	75145	1
74926	ATA	ATC	I	I	Yes	transcriptional regulator, TetR family	74522	75145	1
74931	AAT	AGT	N	S	No	transcriptional regulator, TetR family	74522	75145	1
74941	CAG	CAA	Q	Q	Yes	transcriptional regulator, TetR family	74522	75145	1
75771	GGT	GGA	G	G	Yes	Uridine phosphorylase (EC 2.4.2.3)	75445	76209	1
75843	GGA	GGG	G	G	Yes	Uridine phosphorylase (EC 2.4.2.3)	75445	76209	1
75855	CAC	CAT	H	H	Yes	Uridine phosphorylase (EC 2.4.2.3)	75445	76209	1
75942	TAC	TAT	Y	Y	Yes	Uridine phosphorylase (EC 2.4.2.3)	75445	76209	1
76023	TGT	TGC	C	C	Yes	Uridine phosphorylase (EC 2.4.2.3)	75445	76209	1
76035	GAG	GAA	E	E	Yes	Uridine phosphorylase (EC 2.4.2.3)	75445	76209	1
76047	TCT	TCG	S	S	Yes	Uridine phosphorylase (EC 2.4.2.3)	75445	76209	1
76152	GGA	GGC	G	G	Yes	Uridine phosphorylase (EC 2.4.2.3)	75445	76209	1
76217	T	G				Intergenic region
76241	C	T				Intergenic region
76332	GTG	GTA	V	V	Yes	Potassium uptake protein, integral membrane component, KtrB	76243	77622	1
76344	GGC	GGT	G	G	Yes	Potassium uptake protein, integral membrane component, KtrB	76243	77622	1
76347	TCG	TCT	S	S	Yes	Potassium uptake protein, integral membrane component, KtrB	76243	77622	1
76379	GGA	GAA	G	E	No	Potassium uptake protein, integral membrane component, KtrB	76243	77622	1
76419	ACT	ACC	T	T	Yes	Potassium uptake protein, integral membrane component, KtrB	76243	77622	1
76425	TCT	TCC	S	S	Yes	Potassium uptake protein, integral membrane component, KtrB	76243	77622	1
76473	TAC	TAT	Y	Y	Yes	Potassium uptake protein, integral membrane component, KtrB	76243	77622	1
76485	GGT	GGC	G	G	Yes	Potassium uptake protein, integral membrane component, KtrB	76243	77622	1
76578	AGT	AGC	S	S	Yes	Potassium uptake protein, integral membrane component, KtrB	76243	77622	1
76587	GGC	GGT	G	G	Yes	Potassium uptake protein, integral membrane component, KtrB	76243	77622	1
76650	CGT	CGC	R	R	Yes	Potassium uptake protein, integral membrane component, KtrB	76243	77622	1
76672	CTA	TTG	L	L	Yes	Potassium uptake protein, integral membrane component, KtrB	76243	77622	1
76674	A	G	Merged with SNP 76672
76684	CTC	ATC	L	I	No	Potassium uptake protein, integral membrane component, KtrB	76243	77622	1
76744	TTA	CTA	L	L	Yes	Potassium uptake protein, integral membrane component, KtrB	76243	77622	1
76779	TGT	TGC	C	C	Yes	Potassium uptake protein, integral membrane component, KtrB	76243	77622	1
76816	CTA	GTA	L	V	No	Potassium uptake protein, integral membrane component, KtrB	76243	77622	1
76984	TTG	CTG	L	L	Yes	Potassium uptake protein, integral membrane component, KtrB	76243	77622	1
77283	GTA	GTG	V	V	Yes	Potassium uptake protein, integral membrane component, KtrB	76243	77622	1
77295	ACC	ACT	T	T	Yes	Potassium uptake protein, integral membrane component, KtrB	76243	77622	1
77349	CTG	CTA	L	L	Yes	Potassium uptake protein, integral membrane component, KtrB	76243	77622	1
77352	ACC	ACA	T	T	Yes	Potassium uptake protein, integral membrane component, KtrB	76243	77622	1
77373	CTA	CTG	L	L	Yes	Potassium uptake protein, integral membrane component, KtrB	76243	77622	1
77374	TTA	CTA	L	L	Yes	Potassium uptake protein, integral membrane component, KtrB	76243	77622	1
77409	ATT	ATC	I	I	Yes	Potassium uptake protein, integral membrane component, KtrB	76243	77622	1
77436	GCA	GCC	A	A	Yes	Potassium uptake protein, integral membrane component, KtrB	76243	77622	1
77451	GGA	GGG	G	G	Yes	Potassium uptake protein, integral membrane component, KtrB	76243	77622	1
78537	GCC	GCT	A	A	Yes	Cell wall surface anchor family protein	78457	80247	1
78576	GCG	GCA	A	A	Yes	Cell wall surface anchor family protein	78457	80247	1
78579	CGT	CGC	R	R	Yes	Cell wall surface anchor family protein	78457	80247	1
78615	GTA	GTG	V	V	Yes	Cell wall surface anchor family protein	78457	80247	1
78620	GGC	GAC	G	D	No	Cell wall surface anchor family protein	78457	80247	1
78642	AAG	AAA	K	K	Yes	Cell wall surface anchor family protein	78457	80247	1
78903	GCA	GCG	A	A	Yes	Cell wall surface anchor family protein	78457	80247	1
78918	ACT	ACC	T	T	Yes	Cell wall surface anchor family protein	78457	80247	1
79085	AAA	ACA	K	T	No	Cell wall surface anchor family protein	78457	80247	1
79157	GGT	GAT	G	D	No	Cell wall surface anchor family protein	78457	80247	1
79166	ACA	AGA	T	R	No	Cell wall surface anchor family protein	78457	80247	1
79196	GAA	GGA	E	G	No	Cell wall surface anchor family protein	78457	80247	1
79250	AAA	AGA	K	R	No	Cell wall surface anchor family protein	78457	80247	1
79265	GAC	GGC	D	G	No	Cell wall surface anchor family protein	78457	80247	1
79268	AAC	AAC	N	N	Yes	Cell wall surface anchor family protein	78457	80247	1
79277	GCT	GAT	A	D	No	Cell wall surface anchor family protein	78457	80247	1
79391	AAA	AAA	K	K	Yes	Cell wall surface anchor family protein	78457	80247	1
79415	AAA	AAA	K	K	Yes	Cell wall surface anchor family protein	78457	80247	1
79418	GCT	GGT	A	G	No	Cell wall surface anchor family protein	78457	80247	1
79478	ACT	ACT	T	T	Yes	Cell wall surface anchor family protein	78457	80247	1
79538	GTT	GGT	V	G	No	Cell wall surface anchor family protein	78457	80247	1
79541	GTT	GCT	V	A	No	Cell wall surface anchor family protein	78457	80247	1
79595	AAT	AAT	N	N	Yes	Cell wall surface anchor family protein	78457	80247	1
79601	CCG	CCG	P	P	Yes	Cell wall surface anchor family protein	78457	80247	1
79613	TTG	TCG	L	S	No	Cell wall surface anchor family protein	78457	80247	1
79616	GCC	GAC	A	D	No	Cell wall surface anchor family protein	78457	80247	1
79697	AAA	AAA	K	K	Yes	Cell wall surface anchor family protein	78457	80247	1
79699	GCC	CCC	A	P	No	Cell wall surface anchor family protein	78457	80247	1
79702	CCA	TCA	P	S	No	Cell wall surface anchor family protein	78457	80247	1
79703	T	C	Merged with SNP 79702
79736	GCT	GTT	A	V	No	Cell wall surface anchor family protein	78457	80247	1
79751	GAA	GAA	E	E	Yes	Cell wall surface anchor family protein	78457	80247	1
79790	TTG	TAG	L	*	No	Cell wall surface anchor family protein	78457	80247	1
79814	GAT	GAT	D	D	Yes	Cell wall surface anchor family protein	78457	80247	1
79829	CTG	CAG	L	Q	No	Cell wall surface anchor family protein	78457	80247	1
79904	CCT	CAT	P	H	No	Cell wall surface anchor family protein	78457	80247	1
79934	CAA	CAA	Q	Q	Yes	Cell wall surface anchor family protein	78457	80247	1
79952	CGT	CGT	R	R	Yes	Cell wall surface anchor family protein	78457	80247	1
80015	ACA	AAA	T	K	No	Cell wall surface anchor family protein	78457	80247	1
80135	ATG	AAG	M	K	No	Cell wall surface anchor family protein	78457	80247	1
80159	AAA	AGA	K	R	No	Cell wall surface anchor family protein	78457	80247	1
80165	GCT	GGT	A	G	No	Cell wall surface anchor family protein	78457	80247	1
80219	TTG	TGG	L	W	No	Cell wall surface anchor family protein	78457	80247	1
80224	TTG	CTG	L	L	Yes	Cell wall surface anchor family protein	78457	80247	1
80225	C	T	Merged with SNP 80224
80234	AAA	ATA	K	I	No	Cell wall surface anchor family protein	78457	80247	1
80258	G	A				Intergenic region
80267	A	G				Intergenic region
80273	A	G				Intergenic region
80330	ATG	ATG	M	M	Yes	Two-component response regulator SA14-24	80328	81026	1
80333	AAA	AAG	K	K	Yes	Two-component response regulator SA14-24	80328	81026	1
80348	CTG	CTT	L	L	Yes	Two-component response regulator SA14-24	80328	81026	1
80351	GTT	GTA	V	V	Yes	Two-component response regulator SA14-24	80328	81026	1
80357	GAT	GAC	D	D	Yes	Two-component response regulator SA14-24	80328	81026	1
80496	CCC	CCC	P	P	Yes	Two-component response regulator SA14-24	80328	81026	1
80508	GGT	AGT	G	S	No	Two-component response regulator SA14-24	80328	81026	1
80576	AAG	AAG	K	K	Yes	Two-component response regulator SA14-24	80328	81026	1
80597	ATT	ATT	I	I	Yes	Two-component response regulator SA14-24	80328	81026	1
80635	AAG	AGG	K	R	No	Two-component response regulator SA14-24	80328	81026	1
80648	CCA	CCG	P	P	Yes	Two-component response regulator SA14-24	80328	81026	1
80666	AGA	AGA	R	R	Yes	Two-component response regulator SA14-24	80328	81026	1
80669	GTG	GTT	V	V	Yes	Two-component response regulator SA14-24	80328	81026	1
80675	AAT	AAA	N	K	No	Two-component response regulator SA14-24	80328	81026	1
80789	ACA	ACT	T	T	Yes	Two-component response regulator SA14-24	80328	81026	1
80798	TCC	TCG	S	S	Yes	Two-component response regulator SA14-24	80328	81026	1
80804	GAA	GAG	E	E	Yes	Two-component response regulator SA14-24	80328	81026	1
80876	CAA	CAC	Q	H	No	Two-component response regulator SA14-24	80328	81026	1
80917	ATC	AAC	I	N	No	Two-component response regulator SA14-24	80328	81026	1
80918	ATC	ATG	I	M	No	Two-component response regulator SA14-24	80328	81026	1
80927	TTG	TTA	L	L	Yes	Two-component response regulator SA14-24	80328	81026	1
80987	GGT	GGA	G	G	Yes	Two-component response regulator SA14-24	80328	81026	1
81008	AAA	AAA	K	K	Yes	Two-component response regulator SA14-24	80328	81026	1
81128	GTT	TTT	V	F	No	Two-component sensor kinase SA14-24	81023	82057	1
81140	GTT	ATT	V	I	No	Two-component sensor kinase SA14-24	81023	82057	1
81182	AGT	TGT	S	C	No	Two-component sensor kinase SA14-24	81023	82057	1
81230	AAA	GAA	K	E	No	Two-component sensor kinase SA14-24	81023	82057	1
81296	TTT	GTT	F	V	No	Two-component sensor kinase SA14-24	81023	82057	1
81324	GAC	GCC	D	A	No	Two-component sensor kinase SA14-24	81023	82057	1
81371	GAG	AAG	E	K	No	Two-component sensor kinase SA14-24	81023	82057	1
81398	CAG	GAG	Q	E	No	Two-component sensor kinase SA14-24	81023	82057	1
81403	CTC	CTG	L	L	Yes	Two-component sensor kinase SA14-24	81023	82057	1
81485	CGG	GGG	R	G	No	Two-component sensor kinase SA14-24	81023	82057	1
81507	ATT	ACT	I	T	No	Two-component sensor kinase SA14-24	81023	82057	1
81585	ACT	AGT	T	S	No	Two-component sensor kinase SA14-24	81023	82057	1
81654	CTC	CGC	L	R	No	Two-component sensor kinase SA14-24	81023	82057	1
81678	GAT	GGT	D	G	No	Two-component sensor kinase SA14-24	81023	82057	1
81708	GCG	GCG	A	A	Yes	Two-component sensor kinase SA14-24	81023	82057	1
81753	AAT	ACT	N	T	No	Two-component sensor kinase SA14-24	81023	82057	1
81783	GAA	GAA	E	E	Yes	Two-component sensor kinase SA14-24	81023	82057	1
81791	ACC	GCC	T	A	No	Two-component sensor kinase SA14-24	81023	82057	1
81798	ATC	AAC	I	N	No	Two-component sensor kinase SA14-24	81023	82057	1
81801	GAG	GGG	E	G	No	Two-component sensor kinase SA14-24	81023	82057	1
81861	GGG	GTG	G	V	No	Two-component sensor kinase SA14-24	81023	82057	1
81867	CTT	CGT	L	R	No	Two-component sensor kinase SA14-24	81023	82057	1
81891	TTT	TCT	F	S	No	Two-component sensor kinase SA14-24	81023	82057	1
81894	AAA	AAA	K	K	Yes	Two-component sensor kinase SA14-24	81023	82057	1
81917	TCG	ACG	S	T	No	Two-component sensor kinase SA14-24	81023	82057	1
81942	CAT	CGT	H	R	No	Two-component sensor kinase SA14-24	81023	82057	1
81945	GGC	GAC	G	D	No	Two-component sensor kinase SA14-24	81023	82057	1
81954	CTT	CAT	L	H	No	Two-component sensor kinase SA14-24	81023	82057	1
81972	CTA	CTA	L	L	Yes	Two-component sensor kinase SA14-24	81023	82057	1
81987	GGT	GGT	G	G	Yes	Two-component sensor kinase SA14-24	81023	82057	1
82035	ACA	ATA	T	I	No	Two-component sensor kinase SA14-24	81023	82057	1
82037	TTC	TTC	F	F	Yes	Two-component sensor kinase SA14-24	81023	82057	1
82041	AGC	ATC	S	I	No	Two-component sensor kinase SA14-24	81023	82057	1
82044	CTC	CCC	L	P	No	Two-component sensor kinase SA14-24	81023	82057	1
82047	AAT	AAT	N	N	Yes	Two-component sensor kinase SA14-24	81023	82057	1
82098	A	G				Intergenic region
82239	T	C				Intergenic region
82308	CTT	CCT	L	P	No	SSU ribosomal protein S4p (S9e)	82259	82870	1
82332	GAA	GGA	E	G	No	SSU ribosomal protein S4p (S9e)	82259	82870	1
82371	CCA	CGA	P	R	No	SSU ribosomal protein S4p (S9e)	82259	82870	1
82392	TCA	TTA	S	L	No	SSU ribosomal protein S4p (S9e)	82259	82870	1
82401	GGT	GAT	G	D	No	SSU ribosomal protein S4p (S9e)	82259	82870	1
82410	TTG	TCG	L	S	No	SSU ribosomal protein S4p (S9e)	82259	82870	1
82440	TAC	TAC	Y	Y	Yes	SSU ribosomal protein S4p (S9e)	82259	82870	1
82452	GAA	GGA	E	G	No	SSU ribosomal protein S4p (S9e)	82259	82870	1
82485	ACA	AGA	T	R	No	SSU ribosomal protein S4p (S9e)	82259	82870	1
82524	CTT	CGT	L	R	No	SSU ribosomal protein S4p (S9e)	82259	82870	1
82527	CTT	CGT	L	R	No	SSU ribosomal protein S4p (S9e)	82259	82870	1
82575	ACT	AAT	T	N	No	SSU ribosomal protein S4p (S9e)	82259	82870	1
82590	GCT	GGT	A	G	No	SSU ribosomal protein S4p (S9e)	82259	82870	1
82623	GTT	GGT	V	G	No	SSU ribosomal protein S4p (S9e)	82259	82870	1
82638	GTT	GCT	V	A	No	SSU ribosomal protein S4p (S9e)	82259	82870	1
82655	CGT	AGT	R	S	No	SSU ribosomal protein S4p (S9e)	82259	82870	1
82674	GTA	GGA	V	G	No	SSU ribosomal protein S4p (S9e)	82259	82870	1
82698	TTG	TTG	L	L	Yes	SSU ribosomal protein S4p (S9e)	82259	82870	1
82761	TTC	TGC	F	C	No	SSU ribosomal protein S4p (S9e)	82259	82870	1
82800	CCA	CAA	P	Q	No	SSU ribosomal protein S4p (S9e)	82259	82870	1
82809	GAC	GAC	D	D	Yes	SSU ribosomal protein S4p (S9e)	82259	82870	1
82830	AAC	AGC	N	S	No	SSU ribosomal protein S4p (S9e)	82259	82870	1
82833	GAA	GGA	E	G	No	SSU ribosomal protein S4p (S9e)	82259	82870	1
83013	T	C				Intergenic region
83034	C	T				Intergenic region
83049	T	C				Intergenic region
83064	T	G				Intergenic region
83094	A	T				Intergenic region
83121	C	A				Intergenic region
83124	C	T				Intergenic region
83138	T	C				Intergenic region
83156	G	A				Intergenic region
91466	GGT	GCT	G	A	No	Dihydroxy-acid dehydratase (EC 4.2.1.9)	89965	91668	1
92476	AGT	AGT	S	S	Yes	Positive transcriptional regulator, MutR family	92308	93159	1
92920	AGC	CGC	S	R	No	Positive transcriptional regulator, MutR family	92308	93159	1
92989	GAA	AAA	E	K	No	Positive transcriptional regulator, MutR family	92308	93159	1
93037	CTT	CTT	L	L	Yes	Positive transcriptional regulator, MutR family	92308	93159	1
93052	GGT	AGT	G	S	No	Positive transcriptional regulator, MutR family	92308	93159	1
93063	AAG	AAT	K	N	No	Positive transcriptional regulator, MutR family	92308	93159	1
93178	G	A				Intergenic region
93196	G	A				Intergenic region
93244	C	T				Intergenic region
93340	A	G				Intergenic region
93379	CAA	CCA	Q	P	No	Macrolide-efflux protein	93357	94604	1
93424	GGT	GGT	G	G	Yes	Macrolide-efflux protein	93357	94604	1
93517	CTT	CGT	L	R	No	Macrolide-efflux protein	93357	94604	1
93520	CCG	CGG	P	R	No	Macrolide-efflux protein	93357	94604	1
93565	AGG	AGG	R	R	Yes	Macrolide-efflux protein	93357	94604	1
93642	CAA	GAA	Q	E	No	Macrolide-efflux protein	93357	94604	1
93655	TTT	TGT	F	C	No	Macrolide-efflux protein	93357	94604	1
93661	TTT	TAT	F	Y	No	Macrolide-efflux protein	93357	94604	1
93685	GTC	GTC	V	V	Yes	Macrolide-efflux protein	93357	94604	1
93703	AGT	AAT	S	N	No	Macrolide-efflux protein	93357	94604	1
93707	GAT	GAT	D	D	Yes	Macrolide-efflux protein	93357	94604	1
93729	CCC	CCC	P	P	Yes	Macrolide-efflux protein	93357	94604	1
93757	GGG	GCG	G	A	No	Macrolide-efflux protein	93357	94604	1
93765	ATG	CTG	M	L	No	Macrolide-efflux protein	93357	94604	1
93788	CAG	CAA	Q	Q	Yes	Macrolide-efflux protein	93357	94604	1
94067	GGT	GGT	G	G	Yes	Macrolide-efflux protein	93357	94604	1
94091	CTT	CTC	L	L	Yes	Macrolide-efflux protein	93357	94604	1
94160	AAT	AAA	N	K	No	Macrolide-efflux protein	93357	94604	1
94176	GCA	CCA	A	P	No	Macrolide-efflux protein	93357	94604	1
94340	GGT	GGG	G	G	Yes	Macrolide-efflux protein	93357	94604	1
94412	AAA	AAC	K	N	No	Macrolide-efflux protein	93357	94604	1
94413	AAT	GAT	N	D	No	Macrolide-efflux protein	93357	94604	1
94502	TCA	TCT	S	S	Yes	Macrolide-efflux protein	93357	94604	1
94523	ATA	ATC	I	I	Yes	Macrolide-efflux protein	93357	94604	1
94559	TTG	TTC	L	F	No	Macrolide-efflux protein	93357	94604	1
94598	GAT	GAA	D	E	No	Macrolide-efflux protein	93357	94604	1
94646	T	G				Intergenic region
94652	A	T				Intergenic region
94658	C	A				Intergenic region
94712	GAT	TAT	D	Y	No	Histidyl-tRNA synthetase (EC 6.1.1.21)	94682	95962	1
94718	TTA	TTA	L	L	Yes	Histidyl-tRNA synthetase (EC 6.1.1.21)	94682	95962	1
94721	CCT	CCT	P	P	Yes	Histidyl-tRNA synthetase (EC 6.1.1.21)	94682	95962	1
94736	AAG	TAG	K	*	No	Histidyl-tRNA synthetase (EC 6.1.1.21)	94682	95962	1
94766	GAA	TAA	E	*	No	Histidyl-tRNA synthetase (EC 6.1.1.21)	94682	95962	1
94778	CGC	CGC	R	R	Yes	Histidyl-tRNA synthetase (EC 6.1.1.21)	94682	95962	1
94790	GCG	TCG	A	S	No	Histidyl-tRNA synthetase (EC 6.1.1.21)	94682	95962	1
94796	GTG	ATG	V	M	No	Histidyl-tRNA synthetase (EC 6.1.1.21)	94682	95962	1
94820	TAC	GAC	Y	D	No	Histidyl-tRNA synthetase (EC 6.1.1.21)	94682	95962	1
94823	GAG	CAG	E	Q	No	Histidyl-tRNA synthetase (EC 6.1.1.21)	94682	95962	1
94845	GGG	GGG	G	G	Yes	Histidyl-tRNA synthetase (EC 6.1.1.21)	94682	95962	1
94856	GAT	GAT	D	D	Yes	Histidyl-tRNA synthetase (EC 6.1.1.21)	94682	95962	1
94887	TAT	TCT	Y	S	No	Histidyl-tRNA synthetase (EC 6.1.1.21)	94682	95962	1
94889	GAC	CAC	D	H	No	Histidyl-tRNA synthetase (EC 6.1.1.21)	94682	95962	1
94940	GTC	CTC	V	L	No	Histidyl-tRNA synthetase (EC 6.1.1.21)	94682	95962	1
94967	TTC	CTC	F	L	No	Histidyl-tRNA synthetase (EC 6.1.1.21)	94682	95962	1
95036	CAG	AAG	Q	K	No	Histidyl-tRNA synthetase (EC 6.1.1.21)	94682	95962	1
95037	C	A	Merged with SNP 95036
95042	GGG	AGG	G	R	No	Histidyl-tRNA synthetase (EC 6.1.1.21)	94682	95962	1
95117	ATC	CTC	I	L	No	Histidyl-tRNA synthetase (EC 6.1.1.21)	94682	95962	1
95120	GCT	CCT	A	P	No	Histidyl-tRNA synthetase (EC 6.1.1.21)	94682	95962	1
95126	GCA	CCA	A	P	No	Histidyl-tRNA synthetase (EC 6.1.1.21)	94682	95962	1
95132	CAT	TAT	H	Y	No	Histidyl-tRNA synthetase (EC 6.1.1.21)	94682	95962	1
95207	GCT	CCT	A	P	No	Histidyl-tRNA synthetase (EC 6.1.1.21)	94682	95962	1
95231	TAT	GAT	Y	D	No	Histidyl-tRNA synthetase (EC 6.1.1.21)	94682	95962	1
95240	CCA	TCA	P	S	No	Histidyl-tRNA synthetase (EC 6.1.1.21)	94682	95962	1
97880	TCA	TCA	S	S	Yes	Membrane-bound protease, CAAX family	97792	98433	1
98478	ATA	ATA	I	I	Yes	FIG01114689: hypothetical protein	98451	98669	1
98580	GGT	CTT	G	L	No	FIG01114689: hypothetical protein	98451	98669	1
98581	C	T	Merged with SNP 98580
98583	GTC	ATC	V	I	No	FIG01114689: hypothetical protein	98451	98669	1
98601	GCT	TCT	A	S	No	FIG01114689: hypothetical protein	98451	98669	1
98619	GTT	CTT	V	L	No	FIG01114689: hypothetical protein	98451	98669	1
98628	AAA	AAA	K	K	Yes	FIG01114689: hypothetical protein	98451	98669	1
98800	A	G				Intergenic region
99249	CTT	CTG	L	L	Yes	Aspartyl-tRNA synthetase (EC 6.1.1.12)	98821	100584	1
99366	CCA	CCG	P	P	Yes	Aspartyl-tRNA synthetase (EC 6.1.1.12)	98821	100584	1
99468	GTT	GTG	V	V	Yes	Aspartyl-tRNA synthetase (EC 6.1.1.12)	98821	100584	1
99477	TTC	TTG	F	L	No	Aspartyl-tRNA synthetase (EC 6.1.1.12)	98821	100584	1
99492	TTG	TTT	L	F	No	Aspartyl-tRNA synthetase (EC 6.1.1.12)	98821	100584	1
99501	GAC	GAG	D	E	No	Aspartyl-tRNA synthetase (EC 6.1.1.12)	98821	100584	1
99534	GAA	GAT	E	D	No	Aspartyl-tRNA synthetase (EC 6.1.1.12)	98821	100584	1
99579	GGA	GGG	G	G	Yes	Aspartyl-tRNA synthetase (EC 6.1.1.12)	98821	100584	1
99585	ATT	ATG	I	M	No	Aspartyl-tRNA synthetase (EC 6.1.1.12)	98821	100584	1
99609	AAA	AAT	K	N	No	Aspartyl-tRNA synthetase (EC 6.1.1.12)	98821	100584	1
99630	CCA	CCT	P	P	Yes	Aspartyl-tRNA synthetase (EC 6.1.1.12)	98821	100584	1
99657	GCG	GCT	A	A	Yes	Aspartyl-tRNA synthetase (EC 6.1.1.12)	98821	100584	1
99729	GTC	GTG	V	V	Yes	Aspartyl-tRNA synthetase (EC 6.1.1.12)	98821	100584	1
99783	GTA	GTT	V	V	Yes	Aspartyl-tRNA synthetase (EC 6.1.1.12)	98821	100584	1
99786	GTC	GTA	V	V	Yes	Aspartyl-tRNA synthetase (EC 6.1.1.12)	98821	100584	1
99808	TCA	GCA	S	A	No	Aspartyl-tRNA synthetase (EC 6.1.1.12)	98821	100584	1
99816	AAA	AAG	K	K	Yes	Aspartyl-tRNA synthetase (EC 6.1.1.12)	98821	100584	1
99819	GAC	GAA	D	E	No	Aspartyl-tRNA synthetase (EC 6.1.1.12)	98821	100584	1
99864	GGT	GGA	G	G	Yes	Aspartyl-tRNA synthetase (EC 6.1.1.12)	98821	100584	1
99909	GTT	GTA	V	V	Yes	Aspartyl-tRNA synthetase (EC 6.1.1.12)	98821	100584	1
100056	GGC	GGC	G	G	Yes	Aspartyl-tRNA synthetase (EC 6.1.1.12)	98821	100584	1
100095	GTT	GTT	V	V	Yes	Aspartyl-tRNA synthetase (EC 6.1.1.12)	98821	100584	1
100125	GAA	GAA	E	E	Yes	Aspartyl-tRNA synthetase (EC 6.1.1.12)	98821	100584	1
100128	GAA	GAC	E	D	No	Aspartyl-tRNA synthetase (EC 6.1.1.12)	98821	100584	1
100140	ATG	ATT	M	I	No	Aspartyl-tRNA synthetase (EC 6.1.1.12)	98821	100584	1
100212	GTT	GTC	V	V	Yes	Aspartyl-tRNA synthetase (EC 6.1.1.12)	98821	100584	1
100224	GCT	GCA	A	A	Yes	Aspartyl-tRNA synthetase (EC 6.1.1.12)	98821	100584	1
100314	CTT	CTG	L	L	Yes	Aspartyl-tRNA synthetase (EC 6.1.1.12)	98821	100584	1
100326	GCT	GCT	A	A	Yes	Aspartyl-tRNA synthetase (EC 6.1.1.12)	98821	100584	1
100335	GCA	GCA	A	A	Yes	Aspartyl-tRNA synthetase (EC 6.1.1.12)	98821	100584	1
100443	GAA	GAC	E	D	No	Aspartyl-tRNA synthetase (EC 6.1.1.12)	98821	100584	1
100466	TTT	TCT	F	S	No	Aspartyl-tRNA synthetase (EC 6.1.1.12)	98821	100584	1
100551	CAA	CAA	Q	Q	Yes	Aspartyl-tRNA synthetase (EC 6.1.1.12)	98821	100584	1
100572	AGC	AGT	S	S	Yes	Aspartyl-tRNA synthetase (EC 6.1.1.12)	98821	100584	1
100674	AAA	AAA	K	K	Yes	Integral membrane protein	100562	101503	1
100683	GCC	GTC	A	V	No	Integral membrane protein	100562	101503	1
100692	GTT	GAT	V	D	No	Integral membrane protein	100562	101503	1
100707	TCA	TTA	S	L	No	Integral membrane protein	100562	101503	1
100740	GGG	GAG	G	E	No	Integral membrane protein	100562	101503	1
100800	CAC	CAC	H	H	Yes	Integral membrane protein	100562	101503	1
100818	ATT	AGT	I	S	No	Integral membrane protein	100562	101503	1
100842	GCT	GTT	A	V	No	Integral membrane protein	100562	101503	1
100944	CTT	CAT	L	H	No	Integral membrane protein	100562	101503	1
100947	GTG	GAG	V	E	No	Integral membrane protein	100562	101503	1
101013	TTG	TTG	L	L	Yes	Integral membrane protein	100562	101503	1
101043	ATT	AGT	I	S	No	Integral membrane protein	100562	101503	1
101052	GGA	GTA	G	V	No	Integral membrane protein	100562	101503	1
101094	GGG	GGG	G	G	Yes	Integral membrane protein	100562	101503	1
101100	AAT	AGT	N	S	No	Integral membrane protein	100562	101503	1
101157	ACC	AGC	T	S	No	Integral membrane protein	100562	101503	1
101166	TGG	TCG	W	S	No	Integral membrane protein	100562	101503	1
101219	GAC	TAC	D	Y	No	Integral membrane protein	100562	101503	1
101229	TTT	TCT	F	S	No	Integral membrane protein	100562	101503	1
101244	CGC	CAC	R	H	No	Integral membrane protein	100562	101503	1
101283	GTA	GAA	V	E	No	Integral membrane protein	100562	101503	1
101310	CAC	CGC	H	R	No	Integral membrane protein	100562	101503	1
101394	GCA	GAA	A	E	No	Integral membrane protein	100562	101503	1
101436	CCG	CGG	P	R	No	Integral membrane protein	100562	101503	1
101466	GTC	GGC	V	G	No	Integral membrane protein	100562	101503	1
101533	A	G				Intergenic region
101578	TGT	GGT	C	G	No	Maltose operon transcriptional repressor MalR, LacI family	101537	102523	-1
101968	TTT	GTT	F	V	No	Maltose operon transcriptional repressor MalR, LacI family	101537	102523	-1
101972	ATT	ATG	I	M	No	Maltose operon transcriptional repressor MalR, LacI family	101537	102523	-1
102052	ATC	GTC	I	V	No	Maltose operon transcriptional repressor MalR, LacI family	101537	102523	-1
102178	ATG	TTG	M	L	No	Maltose operon transcriptional repressor MalR, LacI family	101537	102523	-1
102186	ATT	AAT	I	N	No	Maltose operon transcriptional repressor MalR, LacI family	101537	102523	-1
102199	CGT	TGT	R	C	No	Maltose operon transcriptional repressor MalR, LacI family	101537	102523	-1
102238	TAC	CAC	Y	H	No	Maltose operon transcriptional repressor MalR, LacI family	101537	102523	-1
102256	GTT	ATT	V	I	No	Maltose operon transcriptional repressor MalR, LacI family	101537	102523	-1
102286	TTC	TTC	F	F	Yes	Maltose operon transcriptional repressor MalR, LacI family	101537	102523	-1
102305	GCC	GCA	A	A	Yes	Maltose operon transcriptional repressor MalR, LacI family	101537	102523	-1
102325	TTG	CTG	L	L	Yes	Maltose operon transcriptional repressor MalR, LacI family	101537	102523	-1
102361	CTA	ATA	L	I	No	Maltose operon transcriptional repressor MalR, LacI family	101537	102523	-1
102379	AAT	GAT	N	D	No	Maltose operon transcriptional repressor MalR, LacI family	101537	102523	-1
102385	CAT	CAT	H	H	Yes	Maltose operon transcriptional repressor MalR, LacI family	101537	102523	-1
102400	AAG	TAG	K	*	No	Maltose operon transcriptional repressor MalR, LacI family	101537	102523	-1
102412	CGC	TGC	R	C	No	Maltose operon transcriptional repressor MalR, LacI family	101537	102523	-1
102445	TCA	CCA	S	P	No	Maltose operon transcriptional repressor MalR, LacI family	101537	102523	-1
102505	GAT	GAT	D	D	Yes	Maltose operon transcriptional repressor MalR, LacI family	101537	102523	-1
102517	GTT	TTT	V	F	No	Maltose operon transcriptional repressor MalR, LacI family	101537	102523	-1
102520	CCC	CCC	P	P	Yes	Maltose operon transcriptional repressor MalR, LacI family	101537	102523	-1
102624	ACC	AAC	T	N	No	Maltodextrose utilization protein MalA	102533	103333	-1
102667	CTG	CTG	L	L	Yes	Maltodextrose utilization protein MalA	102533	103333	-1
102679	GGA	AGA	G	R	No	Maltodextrose utilization protein MalA	102533	103333	-1
102706	TGC	CGC	C	R	No	Maltodextrose utilization protein MalA	102533	103333	-1
102835	AGT	GGT	S	G	No	Maltodextrose utilization protein MalA	102533	103333	-1
102868	AAA	AAA	K	K	Yes	Maltodextrose utilization protein MalA	102533	103333	-1
102877	GCT	CCT	A	P	No	Maltodextrose utilization protein MalA	102533	103333	-1
102907	AGT	GGT	S	G	No	Maltodextrose utilization protein MalA	102533	103333	-1
102943	CTG	ATG	L	M	No	Maltodextrose utilization protein MalA	102533	103333	-1
102946	GAA	CAA	E	Q	No	Maltodextrose utilization protein MalA	102533	103333	-1
102976	GAA	GAA	E	E	Yes	Maltodextrose utilization protein MalA	102533	103333	-1
103129	ACA	ACA	T	T	Yes	Maltodextrose utilization protein MalA	102533	103333	-1
103337	A	G				Intergenic region
103338	A	G				Intergenic region
103680	TTT	TAT	F	Y	No	Maltose/maltodextrin ABC transporter, permease protein MalG	103514	104356	-1
103791	ATT	AAT	I	N	No	Maltose/maltodextrin ABC transporter, permease protein MalG	103514	104356	-1
103803	CGC	CAC	R	H	No	Maltose/maltodextrin ABC transporter, permease protein MalG	103514	104356	-1
103932	TGG	TGG	W	W	Yes	Maltose/maltodextrin ABC transporter, permease protein MalG	103514	104356	-1
103968	GTT	GAT	V	D	No	Maltose/maltodextrin ABC transporter, permease protein MalG	103514	104356	-1
104091	AGT	ATT	S	I	No	Maltose/maltodextrin ABC transporter, permease protein MalG	103514	104356	-1
104100	GTT	GGT	V	G	No	Maltose/maltodextrin ABC transporter, permease protein MalG	103514	104356	-1
104304	CTC	CAC	L	H	No	Maltose/maltodextrin ABC transporter, permease protein MalG	103514	104356	-1
104307	TAC	TTC	Y	F	No	Maltose/maltodextrin ABC transporter, permease protein MalG	103514	104356	-1
104673	AAT	AAG	N	K	No	Maltose/maltodextrin ABC transporter, permease protein MalF	104358	105650	-1
104896	AGT	AGT	S	S	Yes	Maltose/maltodextrin ABC transporter, permease protein MalF	104358	105650	-1
104906	TTT	ATT	F	I	No	Maltose/maltodextrin ABC transporter, permease protein MalF	104358	105650	-1
104911	AAC	AAC	N	N	Yes	Maltose/maltodextrin ABC transporter, permease protein MalF	104358	105650	-1
104914	TCA	TTA	S	L	No	Maltose/maltodextrin ABC transporter, permease protein MalF	104358	105650	-1
104953	CCT	CCT	P	P	Yes	Maltose/maltodextrin ABC transporter, permease protein MalF	104358	105650	-1
104968	GTT	GGT	V	G	No	Maltose/maltodextrin ABC transporter, permease protein MalF	104358	105650	-1
105016	GCG	GTG	A	V	No	Maltose/maltodextrin ABC transporter, permease protein MalF	104358	105650	-1
105019	ACA	AGA	T	R	No	Maltose/maltodextrin ABC transporter, permease protein MalF	104358	105650	-1
105022	TTC	TAC	F	Y	No	Maltose/maltodextrin ABC transporter, permease protein MalF	104358	105650	-1
105158	TTG	GTG	L	V	No	Maltose/maltodextrin ABC transporter, permease protein MalF	104358	105650	-1
105241	TTT	TAT	F	Y	No	Maltose/maltodextrin ABC transporter, permease protein MalF	104358	105650	-1
105247	ATG	AAG	M	K	No	Maltose/maltodextrin ABC transporter, permease protein MalF	104358	105650	-1
105253	GTA	GGA	V	G	No	Maltose/maltodextrin ABC transporter, permease protein MalF	104358	105650	-1
105271	TTG	TGG	L	W	No	Maltose/maltodextrin ABC transporter, permease protein MalF	104358	105650	-1
105274	CTT	CGT	L	R	No	Maltose/maltodextrin ABC transporter, permease protein MalF	104358	105650	-1
105277	TAC	TAC	Y	Y	Yes	Maltose/maltodextrin ABC transporter, permease protein MalF	104358	105650	-1
105289	AAT	ACT	N	T	No	Maltose/maltodextrin ABC transporter, permease protein MalF	104358	105650	-1
105400	GTG	GGG	V	G	No	Maltose/maltodextrin ABC transporter, permease protein MalF	104358	105650	-1
105508	GCG	GAG	A	E	No	Maltose/maltodextrin ABC transporter, permease protein MalF	104358	105650	-1
105511	GCT	GAT	A	D	No	Maltose/maltodextrin ABC transporter, permease protein MalF	104358	105650	-1
105676	C	T				Intergenic region
105694	A	T				Intergenic region
105697	G	T				Intergenic region
105730	T	G				Intergenic region
105808	GCT	GCT	A	A	Yes	Maltose/maltodextrin ABC transporter, substrate binding periplasmic protein MalE	105763	107034	-1
105838	AAA	AAA	K	K	Yes	Maltose/maltodextrin ABC transporter, substrate binding periplasmic protein MalE	105763	107034	-1
105907	CCA	CCT	P	P	Yes	Maltose/maltodextrin ABC transporter, substrate binding periplasmic protein MalE	105763	107034	-1
106039	GAA	GAG	E	E	Yes	Maltose/maltodextrin ABC transporter, substrate binding periplasmic protein MalE	105763	107034	-1
106247	GAA	GCA	E	A	No	Maltose/maltodextrin ABC transporter, substrate binding periplasmic protein MalE	105763	107034	-1
106253	TTC	TGC	F	C	No	Maltose/maltodextrin ABC transporter, substrate binding periplasmic protein MalE	105763	107034	-1
106268	TTG	TAG	L	*	No	Maltose/maltodextrin ABC transporter, substrate binding periplasmic protein MalE	105763	107034	-1
106271	AAC	AAC	N	N	Yes	Maltose/maltodextrin ABC transporter, substrate binding periplasmic protein MalE	105763	107034	-1
106290	GAT	TAT	D	Y	No	Maltose/maltodextrin ABC transporter, substrate binding periplasmic protein MalE	105763	107034	-1
106301	AAA	AGA	K	R	No	Maltose/maltodextrin ABC transporter, substrate binding periplasmic protein MalE	105763	107034	-1
106307	TGG	TAG	W	*	No	Maltose/maltodextrin ABC transporter, substrate binding periplasmic protein MalE	105763	107034	-1
106514	AAA	AAA	K	K	Yes	Maltose/maltodextrin ABC transporter, substrate binding periplasmic protein MalE	105763	107034	-1
106610	GGT	GTT	G	V	No	Maltose/maltodextrin ABC transporter, substrate binding periplasmic protein MalE	105763	107034	-1
106616	GTT	GGT	V	G	No	Maltose/maltodextrin ABC transporter, substrate binding periplasmic protein MalE	105763	107034	-1
106622	GGT	GAT	G	D	No	Maltose/maltodextrin ABC transporter, substrate binding periplasmic protein MalE	105763	107034	-1
106754	GCT	GGT	A	G	No	Maltose/maltodextrin ABC transporter, substrate binding periplasmic protein MalE	105763	107034	-1
107315	C	T				Intergenic region
107319	A	G				Intergenic region
107369	C	G				Intergenic region
107408	A	G				Intergenic region
107439	G	A				Intergenic region
107480	A	G				Intergenic region
107481	G	C				Intergenic region
107528	GTG	GCG	V	A	No	4-alpha-glucanotransferase (amylomaltase) (EC 2.4.1.25)	107506	109023	1
107549	CTA	CGA	L	R	No	4-alpha-glucanotransferase (amylomaltase) (EC 2.4.1.25)	107506	109023	1
107559	GCA	GCG	A	A	Yes	4-alpha-glucanotransferase (amylomaltase) (EC 2.4.1.25)	107506	109023	1
107705	AAT	ATT	N	I	No	4-alpha-glucanotransferase (amylomaltase) (EC 2.4.1.25)	107506	109023	1
107714	TTT	TAT	F	Y	No	4-alpha-glucanotransferase (amylomaltase) (EC 2.4.1.25)	107506	109023	1
107765	CTT	CCT	L	P	No	4-alpha-glucanotransferase (amylomaltase) (EC 2.4.1.25)	107506	109023	1
108404	TTC	TTC	F	F	Yes	4-alpha-glucanotransferase (amylomaltase) (EC 2.4.1.25)	107506	109023	1
108461	GTG	GTG	V	V	Yes	4-alpha-glucanotransferase (amylomaltase) (EC 2.4.1.25)	107506	109023	1
108500	GAA	GAA	E	E	Yes	4-alpha-glucanotransferase (amylomaltase) (EC 2.4.1.25)	107506	109023	1
108503	GAG	GGG	E	G	No	4-alpha-glucanotransferase (amylomaltase) (EC 2.4.1.25)	107506	109023	1
108506	CTT	CGT	L	R	No	4-alpha-glucanotransferase (amylomaltase) (EC 2.4.1.25)	107506	109023	1
108560	ATC	ACC	I	T	No	4-alpha-glucanotransferase (amylomaltase) (EC 2.4.1.25)	107506	109023	1
108569	CGC	CGC	R	R	Yes	4-alpha-glucanotransferase (amylomaltase) (EC 2.4.1.25)	107506	109023	1
108658	GCT	TCT	A	S	No	4-alpha-glucanotransferase (amylomaltase) (EC 2.4.1.25)	107506	109023	1
108668	GTT	GAT	V	D	No	4-alpha-glucanotransferase (amylomaltase) (EC 2.4.1.25)	107506	109023	1
108713	TAC	TAC	Y	Y	Yes	4-alpha-glucanotransferase (amylomaltase) (EC 2.4.1.25)	107506	109023	1
108737	ACT	ATT	T	I	No	4-alpha-glucanotransferase (amylomaltase) (EC 2.4.1.25)	107506	109023	1
108755	CGT	CCT	R	P	No	4-alpha-glucanotransferase (amylomaltase) (EC 2.4.1.25)	107506	109023	1
108830	ATG	AAG	M	K	No	4-alpha-glucanotransferase (amylomaltase) (EC 2.4.1.25)	107506	109023	1
108848	CAA	CCA	Q	P	No	4-alpha-glucanotransferase (amylomaltase) (EC 2.4.1.25)	107506	109023	1
108851	GAC	GCC	D	A	No	4-alpha-glucanotransferase (amylomaltase) (EC 2.4.1.25)	107506	109023	1
108878	CGC	CAC	R	H	No	4-alpha-glucanotransferase (amylomaltase) (EC 2.4.1.25)	107506	109023	1
108911	TGG	TCG	W	S	No	4-alpha-glucanotransferase (amylomaltase) (EC 2.4.1.25)	107506	109023	1
108956	GAA	GCA	E	A	No	4-alpha-glucanotransferase (amylomaltase) (EC 2.4.1.25)	107506	109023	1
108967	GAC	GAC	D	D	Yes	4-alpha-glucanotransferase (amylomaltase) (EC 2.4.1.25)	107506	109023	1
109050	TTA	TGA	L	*	No	Maltodextrin phosphorylase (EC 2.4.1.1)	109046	111304	1
109068	GTA	GGA	V	G	No	Maltodextrin phosphorylase (EC 2.4.1.1)	109046	111304	1
109095	GCA	GGA	A	G	No	Maltodextrin phosphorylase (EC 2.4.1.1)	109046	111304	1
109182	AAA	ACA	K	T	No	Maltodextrin phosphorylase (EC 2.4.1.1)	109046	111304	1
109203	GCT	GGT	A	G	No	Maltodextrin phosphorylase (EC 2.4.1.1)	109046	111304	1
109239	TTG	TGG	L	W	No	Maltodextrin phosphorylase (EC 2.4.1.1)	109046	111304	1
109329	CCA	CGA	P	R	No	Maltodextrin phosphorylase (EC 2.4.1.1)	109046	111304	1
109350	TTG	TGG	L	W	No	Maltodextrin phosphorylase (EC 2.4.1.1)	109046	111304	1
109374	ATC	ATC	I	I	Yes	Maltodextrin phosphorylase (EC 2.4.1.1)	109046	111304	1
109429	CAC	CAC	H	H	Yes	Maltodextrin phosphorylase (EC 2.4.1.1)	109046	111304	1
109443	CAA	CTA	Q	L	No	Maltodextrin phosphorylase (EC 2.4.1.1)	109046	111304	1
109455	AAA	AAA	K	K	Yes	Maltodextrin phosphorylase (EC 2.4.1.1)	109046	111304	1
109461	AAC	AGC	N	S	No	Maltodextrin phosphorylase (EC 2.4.1.1)	109046	111304	1
109476	ATT	AGT	I	S	No	Maltodextrin phosphorylase (EC 2.4.1.1)	109046	111304	1
109536	GTG	GAG	V	E	No	Maltodextrin phosphorylase (EC 2.4.1.1)	109046	111304	1
109539	CCA	CGA	P	R	No	Maltodextrin phosphorylase (EC 2.4.1.1)	109046	111304	1
109578	ATC	ATC	I	I	Yes	Maltodextrin phosphorylase (EC 2.4.1.1)	109046	111304	1
109596	AAG	AAG	K	K	Yes	Maltodextrin phosphorylase (EC 2.4.1.1)	109046	111304	1
109617	TTG	TGG	L	W	No	Maltodextrin phosphorylase (EC 2.4.1.1)	109046	111304	1
109737	CAA	CGA	Q	R	No	Maltodextrin phosphorylase (EC 2.4.1.1)	109046	111304	1
109767	TAC	TGC	Y	C	No	Maltodextrin phosphorylase (EC 2.4.1.1)	109046	111304	1
109815	GAA	GTA	E	V	No	Maltodextrin phosphorylase (EC 2.4.1.1)	109046	111304	1
109823	AGC	GGC	S	G	No	Maltodextrin phosphorylase (EC 2.4.1.1)	109046	111304	1
109842	GCG	GAG	A	E	No	Maltodextrin phosphorylase (EC 2.4.1.1)	109046	111304	1
109869	GAT	GCT	D	A	No	Maltodextrin phosphorylase (EC 2.4.1.1)	109046	111304	1
109935	GAT	GCT	D	A	No	Maltodextrin phosphorylase (EC 2.4.1.1)	109046	111304	1
109948	TCT	TCC	S	S	Yes	Maltodextrin phosphorylase (EC 2.4.1.1)	109046	111304	1
110026	TTG	TTA	L	L	Yes	Maltodextrin phosphorylase (EC 2.4.1.1)	109046	111304	1
110038	GTT	GTT	V	V	Yes	Maltodextrin phosphorylase (EC 2.4.1.1)	109046	111304	1
110047	TTG	TTA	L	L	Yes	Maltodextrin phosphorylase (EC 2.4.1.1)	109046	111304	1
110077	CGT	CGA	R	R	Yes	Maltodextrin phosphorylase (EC 2.4.1.1)	109046	111304	1
110122	GAA	GAA	E	E	Yes	Maltodextrin phosphorylase (EC 2.4.1.1)	109046	111304	1
110125	AAC	AAA	N	K	No	Maltodextrin phosphorylase (EC 2.4.1.1)	109046	111304	1
110137	CAC	CAA	H	Q	No	Maltodextrin phosphorylase (EC 2.4.1.1)	109046	111304	1
110176	AAC	AAG	N	K	No	Maltodextrin phosphorylase (EC 2.4.1.1)	109046	111304	1
110202	ATC	AAC	I	N	No	Maltodextrin phosphorylase (EC 2.4.1.1)	109046	111304	1
110203	ATC	ATT	I	I	Yes	Maltodextrin phosphorylase (EC 2.4.1.1)	109046	111304	1
110260	AAC	AAA	N	K	No	Maltodextrin phosphorylase (EC 2.4.1.1)	109046	111304	1
110374	GAA	GAG	E	E	Yes	Maltodextrin phosphorylase (EC 2.4.1.1)	109046	111304	1
110395	GAC	GAA	D	E	No	Maltodextrin phosphorylase (EC 2.4.1.1)	109046	111304	1
110396	AAA	CAA	K	Q	No	Maltodextrin phosphorylase (EC 2.4.1.1)	109046	111304	1
110452	TTG	TTT	L	F	No	Maltodextrin phosphorylase (EC 2.4.1.1)	109046	111304	1
110506	TTT	TTA	F	L	No	Maltodextrin phosphorylase (EC 2.4.1.1)	109046	111304	1
110509	GAT	GAG	D	E	No	Maltodextrin phosphorylase (EC 2.4.1.1)	109046	111304	1
110518	ATC	ATT	I	I	Yes	Maltodextrin phosphorylase (EC 2.4.1.1)	109046	111304	1
110521	AAA	AAT	K	N	No	Maltodextrin phosphorylase (EC 2.4.1.1)	109046	111304	1
110725	GCT	GCA	A	A	Yes	Maltodextrin phosphorylase (EC 2.4.1.1)	109046	111304	1
110728	CCA	CCC	P	P	Yes	Maltodextrin phosphorylase (EC 2.4.1.1)	109046	111304	1
110743	GTT	GTC	V	V	Yes	Maltodextrin phosphorylase (EC 2.4.1.1)	109046	111304	1
110749	GTT	GTA	V	V	Yes	Maltodextrin phosphorylase (EC 2.4.1.1)	109046	111304	1
110968	GTT	GTT	V	V	Yes	Maltodextrin phosphorylase (EC 2.4.1.1)	109046	111304	1
110971	ATC	ATT	I	I	Yes	Maltodextrin phosphorylase (EC 2.4.1.1)	109046	111304	1
111025	GCT	GCA	A	A	Yes	Maltodextrin phosphorylase (EC 2.4.1.1)	109046	111304	1
111097	CGT	CGC	R	R	Yes	Maltodextrin phosphorylase (EC 2.4.1.1)	109046	111304	1
111099	CTT	CAT	L	H	No	Maltodextrin phosphorylase (EC 2.4.1.1)	109046	111304	1
111196	GAC	GAC	D	D	Yes	Maltodextrin phosphorylase (EC 2.4.1.1)	109046	111304	1
111199	CGT	CGC	R	R	Yes	Maltodextrin phosphorylase (EC 2.4.1.1)	109046	111304	1
111262	CGT	CGG	R	R	Yes	Maltodextrin phosphorylase (EC 2.4.1.1)	109046	111304	1
111271	GCT	GCG	A	A	Yes	Maltodextrin phosphorylase (EC 2.4.1.1)	109046	111304	1
111388	A	G				Intergenic region
111397	C	A				Intergenic region
111403	T	C				Intergenic region
111405	C	T				Intergenic region
111408	G	A				Intergenic region
111418	A	G				Intergenic region
111484	G	C				Intergenic region
111490	A	G				Intergenic region
111499	T	C				Intergenic region
111502	G	A				Intergenic region
111505	A	G				Intergenic region
111511	G	A				Intergenic region
111529	A	G				Intergenic region
111613	A	C				Intergenic region
111615	G	A				Intergenic region
111646	G	A				Intergenic region
111649	C	A				Intergenic region
111652	T	C				Intergenic region
111664	G	A				Intergenic region
111847	C	A				Intergenic region
111926	CAA	CAA	Q	Q	Yes	Ribosomal RNA large subunit methyltransferase A (EC 2.1.1.51)	111853	112701	-1
111928	GAC	GGA	D	G	No	Ribosomal RNA large subunit methyltransferase A (EC 2.1.1.51)	111853	112701	-1
111929	A	C	Merged with SNP 111928
111968	CAA	CGA	Q	R	No	Ribosomal RNA large subunit methyltransferase A (EC 2.1.1.51)	111853	112701	-1
111989	CCT	CCT	P	P	Yes	Ribosomal RNA large subunit methyltransferase A (EC 2.1.1.51)	111853	112701	-1
112150	GGT	GGC	G	G	Yes	Ribosomal RNA large subunit methyltransferase A (EC 2.1.1.51)	111853	112701	-1
112153	GAC	GAC	D	D	Yes	Ribosomal RNA large subunit methyltransferase A (EC 2.1.1.51)	111853	112701	-1
112186	AAC	AAA	N	K	No	Ribosomal RNA large subunit methyltransferase A (EC 2.1.1.51)	111853	112701	-1
112195	TCG	TCG	S	S	Yes	Ribosomal RNA large subunit methyltransferase A (EC 2.1.1.51)	111853	112701	-1
112233	AAA	GAA	K	E	No	Ribosomal RNA large subunit methyltransferase A (EC 2.1.1.51)	111853	112701	-1
112345	GAC	GAT	D	D	Yes	Ribosomal RNA large subunit methyltransferase A (EC 2.1.1.51)	111853	112701	-1
112468	TTT	TTT	F	F	Yes	Ribosomal RNA large subunit methyltransferase A (EC 2.1.1.51)	111853	112701	-1
112591	AGC	AGG	S	R	No	Ribosomal RNA large subunit methyltransferase A (EC 2.1.1.51)	111853	112701	-1
112594	TGT	TCT	C	S	No	Ribosomal RNA large subunit methyltransferase A (EC 2.1.1.51)	111853	112701	-1
112595	A	G	Merged with SNP 112594
112599	AAG	AAG	K	K	Yes	Ribosomal RNA large subunit methyltransferase A (EC 2.1.1.51)	111853	112701	-1
112603	AGC	AGC	S	S	Yes	Ribosomal RNA large subunit methyltransferase A (EC 2.1.1.51)	111853	112701	-1
112609	GAG	GAG	E	E	Yes	Ribosomal RNA large subunit methyltransferase A (EC 2.1.1.51)	111853	112701	-1
112642	TGC	TGG	C	W	No	Ribosomal RNA large subunit methyltransferase A (EC 2.1.1.51)	111853	112701	-1
112655	ACT	ATT	T	I	No	Ribosomal RNA large subunit methyltransferase A (EC 2.1.1.51)	111853	112701	-1
112665	GCT	ACT	A	T	No	Ribosomal RNA large subunit methyltransferase A (EC 2.1.1.51)	111853	112701	-1
112682	CCC	CAC	P	H	No	Ribosomal RNA large subunit methyltransferase A (EC 2.1.1.51)	111853	112701	-1
112693	ACA	ACC	T	T	Yes	Ribosomal RNA large subunit methyltransferase A (EC 2.1.1.51)	111853	112701	-1
112878	GCA	GTA	A	V	No	FIG01114477: hypothetical protein	112853	113131	1
112921	GCA	GCC	A	A	Yes	FIG01114477: hypothetical protein	112853	113131	1
112927	GGT	GGT	G	G	Yes	FIG01114477: hypothetical protein	112853	113131	1
112957	AAG	AAA	K	K	Yes	FIG01114477: hypothetical protein	112853	113131	1
112970	GGT	CGT	G	R	No	FIG01114477: hypothetical protein	112853	113131	1
113099	GAA	GAA	E	E	Yes	FIG01114477: hypothetical protein	112853	113131	1
113351	GAT	GAA	D	E	No	Copper-translocating P-type ATPase (EC 3.6.3.4)	113133	115193	1
113357	GGG	GGA	G	G	Yes	Copper-translocating P-type ATPase (EC 3.6.3.4)	113133	115193	1
113380	CTT	CAT	L	H	No	Copper-translocating P-type ATPase (EC 3.6.3.4)	113133	115193	1
113408	TAT	TAC	Y	Y	Yes	Copper-translocating P-type ATPase (EC 3.6.3.4)	113133	115193	1
114551	CAG	CAG	Q	Q	Yes	Copper-translocating P-type ATPase (EC 3.6.3.4)	113133	115193	1
114687	GCA	CCA	A	P	No	Copper-translocating P-type ATPase (EC 3.6.3.4)	113133	115193	1
114702	GAG	AAG	E	K	No	Copper-translocating P-type ATPase (EC 3.6.3.4)	113133	115193	1
114744	GGG	AGG	G	R	No	Copper-translocating P-type ATPase (EC 3.6.3.4)	113133	115193	1
114750	ACC	CCC	T	P	No	Copper-translocating P-type ATPase (EC 3.6.3.4)	113133	115193	1
115521	CAA	CTA	Q	L	No	Tyrosyl-tRNA synthetase (EC 6.1.1.1) ## cluster 1	115271	116527	-1
115524	AAA	ACA	K	T	No	Tyrosyl-tRNA synthetase (EC 6.1.1.1) ## cluster 1	115271	116527	-1
115533	AAA	ACA	K	T	No	Tyrosyl-tRNA synthetase (EC 6.1.1.1) ## cluster 1	115271	116527	-1
115611	CAC	CTC	H	L	No	Tyrosyl-tRNA synthetase (EC 6.1.1.1) ## cluster 1	115271	116527	-1
115623	GTG	GTG	V	V	Yes	Tyrosyl-tRNA synthetase (EC 6.1.1.1) ## cluster 1	115271	116527	-1
115626	GTC	GTC	V	V	Yes	Tyrosyl-tRNA synthetase (EC 6.1.1.1) ## cluster 1	115271	116527	-1
115647	CAG	CTG	Q	L	No	Tyrosyl-tRNA synthetase (EC 6.1.1.1) ## cluster 1	115271	116527	-1
115707	CTC	CTC	L	L	Yes	Tyrosyl-tRNA synthetase (EC 6.1.1.1) ## cluster 1	115271	116527	-1
115710	TCA	TGA	S	*	No	Tyrosyl-tRNA synthetase (EC 6.1.1.1) ## cluster 1	115271	116527	-1
115734	TTC	TAC	F	Y	No	Tyrosyl-tRNA synthetase (EC 6.1.1.1) ## cluster 1	115271	116527	-1
118485	GTA	GTG	V	V	Yes	Multimodular transpeptidase-transglycosylase (EC 2.4.1.129) (EC 3.4.-.-)	116668	119175	1
118536	ACC	ACT	T	T	Yes	Multimodular transpeptidase-transglycosylase (EC 2.4.1.129) (EC 3.4.-.-)	116668	119175	1
118560	GAT	GAG	D	E	No	Multimodular transpeptidase-transglycosylase (EC 2.4.1.129) (EC 3.4.-.-)	116668	119175	1
118578	ATT	ATA	I	I	Yes	Multimodular transpeptidase-transglycosylase (EC 2.4.1.129) (EC 3.4.-.-)	116668	119175	1
118623	CTC	CTC	L	L	Yes	Multimodular transpeptidase-transglycosylase (EC 2.4.1.129) (EC 3.4.-.-)	116668	119175	1
118632	GCT	GCT	A	A	Yes	Multimodular transpeptidase-transglycosylase (EC 2.4.1.129) (EC 3.4.-.-)	116668	119175	1
118730	GAC	GTC	D	V	No	Multimodular transpeptidase-transglycosylase (EC 2.4.1.129) (EC 3.4.-.-)	116668	119175	1
118826	ATA	AAA	I	K	No	Multimodular transpeptidase-transglycosylase (EC 2.4.1.129) (EC 3.4.-.-)	116668	119175	1
118854	GAT	GAG	D	E	No	Multimodular transpeptidase-transglycosylase (EC 2.4.1.129) (EC 3.4.-.-)	116668	119175	1
118861	GTG	CTG	V	L	No	Multimodular transpeptidase-transglycosylase (EC 2.4.1.129) (EC 3.4.-.-)	116668	119175	1
128367	GGC	GGC	G	G	Yes	Lipid A export ATP-binding/permease protein MsbA	127325	129091	1
128496	ATC	ATC	I	I	Yes	Lipid A export ATP-binding/permease protein MsbA	127325	129091	1
128550	GAT	GGT	D	G	No	Lipid A export ATP-binding/permease protein MsbA	127325	129091	1
128559	GAC	GGC	D	G	No	Lipid A export ATP-binding/permease protein MsbA	127325	129091	1
128574	GAC	GTC	D	V	No	Lipid A export ATP-binding/permease protein MsbA	127325	129091	1
128580	GAC	GTC	D	V	No	Lipid A export ATP-binding/permease protein MsbA	127325	129091	1
128637	ACA	AGA	T	R	No	Lipid A export ATP-binding/permease protein MsbA	127325	129091	1
128652	ATC	ACC	I	T	No	Lipid A export ATP-binding/permease protein MsbA	127325	129091	1
128664	GTG	GTG	V	V	Yes	Lipid A export ATP-binding/permease protein MsbA	127325	129091	1
128692	GAA	GAC	E	D	No	Lipid A export ATP-binding/permease protein MsbA	127325	129091	1
128778	ATC	ACC	I	T	No	Lipid A export ATP-binding/permease protein MsbA	127325	129091	1
128820	ACC	ACC	T	T	Yes	Lipid A export ATP-binding/permease protein MsbA	127325	129091	1
128850	TTA	TTA	L	L	Yes	Lipid A export ATP-binding/permease protein MsbA	127325	129091	1
128877	ACC	AAC	T	N	No	Lipid A export ATP-binding/permease protein MsbA	127325	129091	1
128900	CAT	AAT	H	N	No	Lipid A export ATP-binding/permease protein MsbA	127325	129091	1
128907	ATG	AAG	M	K	No	Lipid A export ATP-binding/permease protein MsbA	127325	129091	1
128969	AAT	GAT	N	D	No	Lipid A export ATP-binding/permease protein MsbA	127325	129091	1
129006	GTC	GGC	V	G	No	Lipid A export ATP-binding/permease protein MsbA	127325	129091	1
129039	AAG	ATG	K	M	No	Lipid A export ATP-binding/permease protein MsbA	127325	129091	1
129060	GAA	GTA	E	V	No	Lipid A export ATP-binding/permease protein MsbA	127325	129091	1
129093	A	G				Intergenic region
129216	A	G				Intergenic region
129243	GTT	CTT	V	L	No	Glutamine amidotransferase, class I	129231	129920	1
129252	GTT	ATT	V	I	No	Glutamine amidotransferase, class I	129231	129920	1
129318	TTT	GTT	F	V	No	Glutamine amidotransferase, class I	129231	129920	1
129321	GCA	CCA	A	P	No	Glutamine amidotransferase, class I	129231	129920	1
129324	GAG	TAG	E	*	No	Glutamine amidotransferase, class I	129231	129920	1
129332	ATT	ATA	I	I	Yes	Glutamine amidotransferase, class I	129231	129920	1
129342	GGT	GGT	G	G	Yes	Glutamine amidotransferase, class I	129231	129920	1
129387	CGC	GGC	R	G	No	Glutamine amidotransferase, class I	129231	129920	1
129420	TTG	CTG	L	L	Yes	Glutamine amidotransferase, class I	129231	129920	1
129482	GAT	GAA	D	E	No	Glutamine amidotransferase, class I	129231	129920	1
129504	GAG	GAG	E	E	Yes	Glutamine amidotransferase, class I	129231	129920	1
129519	CTC	CTC	L	L	Yes	Glutamine amidotransferase, class I	129231	129920	1
129533	GCG	GCA	A	A	Yes	Glutamine amidotransferase, class I	129231	129920	1
129584	GTC	GTG	V	V	Yes	Glutamine amidotransferase, class I	129231	129920	1
129638	GGC	GGT	G	G	Yes	Glutamine amidotransferase, class I	129231	129920	1
129704	GGC	GGG	G	G	Yes	Glutamine amidotransferase, class I	129231	129920	1
129794	CAG	CAC	Q	H	No	Glutamine amidotransferase, class I	129231	129920	1
129809	ATT	ATG	I	M	No	Glutamine amidotransferase, class I	129231	129920	1
129826	CAT	CCT	H	P	No	Glutamine amidotransferase, class I	129231	129920	1
129890	GAA	GAT	E	D	No	Glutamine amidotransferase, class I	129231	129920	1
130016	A	C				Intergenic region
130019	A	G				Intergenic region
130079	T	C				Intergenic region
130342	TCT	TTT	S	F	No	Glucose-6-phosphate isomerase (EC 5.3.1.9)	130089	131438	1
130368	GAC	GAC	D	D	Yes	Glucose-6-phosphate isomerase (EC 5.3.1.9)	130089	131438	1
130389	GCA	ACA	A	T	No	Glucose-6-phosphate isomerase (EC 5.3.1.9)	130089	131438	1
130447	TCA	TTA	S	L	No	Glucose-6-phosphate isomerase (EC 5.3.1.9)	130089	131438	1
130450	ATC	ATC	I	I	Yes	Glucose-6-phosphate isomerase (EC 5.3.1.9)	130089	131438	1
130491	GAC	TAC	D	Y	No	Glucose-6-phosphate isomerase (EC 5.3.1.9)	130089	131438	1
130524	TCA	TCA	S	S	Yes	Glucose-6-phosphate isomerase (EC 5.3.1.9)	130089	131438	1
130639	AAA	ATA	K	I	No	Glucose-6-phosphate isomerase (EC 5.3.1.9)	130089	131438	1
130663	GAT	GAT	D	D	Yes	Glucose-6-phosphate isomerase (EC 5.3.1.9)	130089	131438	1
130672	GGT	GGT	G	G	Yes	Glucose-6-phosphate isomerase (EC 5.3.1.9)	130089	131438	1
130759	GGT	GAT	G	D	No	Glucose-6-phosphate isomerase (EC 5.3.1.9)	130089	131438	1
130789	GCG	GGG	A	G	No	Glucose-6-phosphate isomerase (EC 5.3.1.9)	130089	131438	1
130825	CTT	CAT	L	H	No	Glucose-6-phosphate isomerase (EC 5.3.1.9)	130089	131438	1
130885	TAC	TAC	Y	Y	Yes	Glucose-6-phosphate isomerase (EC 5.3.1.9)	130089	131438	1
131022	CAC	CAC	H	H	Yes	Glucose-6-phosphate isomerase (EC 5.3.1.9)	130089	131438	1
132833	GAA	GAA	E	E	Yes	Glutamyl-tRNA synthetase (EC 6.1.1.17) @ Glutamyl-tRNA(Gln) synthetase (EC 6.1.1.24)	131594	133054	1
132850	GAG	GAT	E	D	No	Glutamyl-tRNA synthetase (EC 6.1.1.17) @ Glutamyl-tRNA(Gln) synthetase (EC 6.1.1.24)	131594	133054	1
132853	GAG	GAA	E	E	Yes	Glutamyl-tRNA synthetase (EC 6.1.1.17) @ Glutamyl-tRNA(Gln) synthetase (EC 6.1.1.24)	131594	133054	1
132880	CAA	CAT	Q	H	No	Glutamyl-tRNA synthetase (EC 6.1.1.17) @ Glutamyl-tRNA(Gln) synthetase (EC 6.1.1.24)	131594	133054	1
132923	CTA	TTA	L	L	Yes	Glutamyl-tRNA synthetase (EC 6.1.1.17) @ Glutamyl-tRNA(Gln) synthetase (EC 6.1.1.24)	131594	133054	1
132952	TCA	TCA	S	S	Yes	Glutamyl-tRNA synthetase (EC 6.1.1.17) @ Glutamyl-tRNA(Gln) synthetase (EC 6.1.1.24)	131594	133054	1
133003	CGT	CGT	R	R	Yes	Glutamyl-tRNA synthetase (EC 6.1.1.17) @ Glutamyl-tRNA(Gln) synthetase (EC 6.1.1.24)	131594	133054	1
133024	ATT	ATG	I	M	No	Glutamyl-tRNA synthetase (EC 6.1.1.17) @ Glutamyl-tRNA(Gln) synthetase (EC 6.1.1.24)	131594	133054	1
133030	AAC	AAT	N	N	Yes	Glutamyl-tRNA synthetase (EC 6.1.1.17) @ Glutamyl-tRNA(Gln) synthetase (EC 6.1.1.24)	131594	133054	1
133036	CTG	CTC	L	L	Yes	Glutamyl-tRNA synthetase (EC 6.1.1.17) @ Glutamyl-tRNA(Gln) synthetase (EC 6.1.1.24)	131594	133054	1
133039	AAG	AAA	K	K	Yes	Glutamyl-tRNA synthetase (EC 6.1.1.17) @ Glutamyl-tRNA(Gln) synthetase (EC 6.1.1.24)	131594	133054	1
133096	G	A				Intergenic region
133416	A	G				Intergenic region
133954	G	A				Intergenic region
134025	A	G				Intergenic region
134070	AAG	AAA	K	K	Yes	FIG01115257: hypothetical protein	134029	135306	1
134083	CAC	AAT	H	N	No	FIG01115257: hypothetical protein	134029	135306	1
134085	C	T	Merged with SNP 134083
134117	TAT	TTT	Y	F	No	FIG01115257: hypothetical protein	134029	135306	1
134166	AAG	AAA	K	K	Yes	FIG01115257: hypothetical protein	134029	135306	1
134199	GGC	GGT	G	G	Yes	FIG01115257: hypothetical protein	134029	135306	1
134410	CGC	TGC	R	C	No	FIG01115257: hypothetical protein	134029	135306	1
134424	CCT	CCC	P	P	Yes	FIG01115257: hypothetical protein	134029	135306	1
134449	CCA	TCA	P	S	No	FIG01115257: hypothetical protein	134029	135306	1
134619	ACT	ACA	T	T	Yes	FIG01115257: hypothetical protein	134029	135306	1
134631	GCT	GCA	A	A	Yes	FIG01115257: hypothetical protein	134029	135306	1
134634	GCC	GCT	A	A	Yes	FIG01115257: hypothetical protein	134029	135306	1
134646	TTG	TTA	L	L	Yes	FIG01115257: hypothetical protein	134029	135306	1
134652	GCA	GCC	A	A	Yes	FIG01115257: hypothetical protein	134029	135306	1
134837	ATC	ACC	I	T	No	FIG01115257: hypothetical protein	134029	135306	1
135024	CCA	CCG	P	P	Yes	FIG01115257: hypothetical protein	134029	135306	1
135036	ACT	ACC	T	T	Yes	FIG01115257: hypothetical protein	134029	135306	1
135051	GCC	GCT	A	A	Yes	FIG01115257: hypothetical protein	134029	135306	1
135341	A	G				Intergenic region
135453	GGT	GGA	G	G	Yes	Threonine synthase (EC 4.2.3.1)	135382	136866	1
135472	CTG	TTG	L	L	Yes	Threonine synthase (EC 4.2.3.1)	135382	136866	1
135483	CCA	CCG	P	P	Yes	Threonine synthase (EC 4.2.3.1)	135382	136866	1
135487	ACT	TCT	T	S	No	Threonine synthase (EC 4.2.3.1)	135382	136866	1
135501	GTG	GTT	V	V	Yes	Threonine synthase (EC 4.2.3.1)	135382	136866	1
135516	GAA	GAC	E	D	No	Threonine synthase (EC 4.2.3.1)	135382	136866	1
135525	AAA	AAG	K	K	Yes	Threonine synthase (EC 4.2.3.1)	135382	136866	1
135567	GCC	GCA	A	A	Yes	Threonine synthase (EC 4.2.3.1)	135382	136866	1
135611	ACC	AAC	T	N	No	Threonine synthase (EC 4.2.3.1)	135382	136866	1
135678	TAT	TAC	Y	Y	Yes	Threonine synthase (EC 4.2.3.1)	135382	136866	1
135688	CTG	TTG	L	L	Yes	Threonine synthase (EC 4.2.3.1)	135382	136866	1
135708	ATC	ATT	I	I	Yes	Threonine synthase (EC 4.2.3.1)	135382	136866	1
135711	GCT	GCC	A	A	Yes	Threonine synthase (EC 4.2.3.1)	135382	136866	1
135720	GAC	GAT	D	D	Yes	Threonine synthase (EC 4.2.3.1)	135382	136866	1
135753	ACA	ACG	T	T	Yes	Threonine synthase (EC 4.2.3.1)	135382	136866	1
135837	GCG	GCA	A	A	Yes	Threonine synthase (EC 4.2.3.1)	135382	136866	1
135873	GTT	GTC	V	V	Yes	Threonine synthase (EC 4.2.3.1)	135382	136866	1
135882	CCG	CCA	P	P	Yes	Threonine synthase (EC 4.2.3.1)	135382	136866	1
135885	AAA	AAG	K	K	Yes	Threonine synthase (EC 4.2.3.1)	135382	136866	1
135894	GTT	GTC	V	V	Yes	Threonine synthase (EC 4.2.3.1)	135382	136866	1
135903	GTA	GTG	V	V	Yes	Threonine synthase (EC 4.2.3.1)	135382	136866	1
135978	GCA	GCG	A	A	Yes	Threonine synthase (EC 4.2.3.1)	135382	136866	1
135987	AAC	AAT	N	N	Yes	Threonine synthase (EC 4.2.3.1)	135382	136866	1
136011	GTG	GTA	V	V	Yes	Threonine synthase (EC 4.2.3.1)	135382	136866	1
136013	GAA	GCA	E	A	No	Threonine synthase (EC 4.2.3.1)	135382	136866	1
136014	GAA	GAT	E	D	No	Threonine synthase (EC 4.2.3.1)	135382	136866	1
136086	GTA	GTG	V	V	Yes	Threonine synthase (EC 4.2.3.1)	135382	136866	1
136098	GTT	GTC	V	V	Yes	Threonine synthase (EC 4.2.3.1)	135382	136866	1
136101	TAT	TAC	Y	Y	Yes	Threonine synthase (EC 4.2.3.1)	135382	136866	1
136113	GCC	GCT	A	A	Yes	Threonine synthase (EC 4.2.3.1)	135382	136866	1
136116	TAC	TAT	Y	Y	Yes	Threonine synthase (EC 4.2.3.1)	135382	136866	1
136146	GTG	GTA	V	V	Yes	Threonine synthase (EC 4.2.3.1)	135382	136866	1
136155	GAA	GAT	E	D	No	Threonine synthase (EC 4.2.3.1)	135382	136866	1
136164	AAT	AAC	N	N	Yes	Threonine synthase (EC 4.2.3.1)	135382	136866	1
136305	GAC	GAT	D	D	Yes	Threonine synthase (EC 4.2.3.1)	135382	136866	1
136323	AAA	AAG	K	K	Yes	Threonine synthase (EC 4.2.3.1)	135382	136866	1
136326	GTG	GTA	V	V	Yes	Threonine synthase (EC 4.2.3.1)	135382	136866	1
136335	AGT	AGC	S	S	Yes	Threonine synthase (EC 4.2.3.1)	135382	136866	1
136350	ATT	ATC	I	I	Yes	Threonine synthase (EC 4.2.3.1)	135382	136866	1
136351	CTG	TTG	L	L	Yes	Threonine synthase (EC 4.2.3.1)	135382	136866	1
136460	ACA	ATA	T	I	No	Threonine synthase (EC 4.2.3.1)	135382	136866	1
136563	ATC	ATT	I	I	Yes	Threonine synthase (EC 4.2.3.1)	135382	136866	1
136593	GCA	GCT	A	A	Yes	Threonine synthase (EC 4.2.3.1)	135382	136866	1
136609	AAA	CAA	K	Q	No	Threonine synthase (EC 4.2.3.1)	135382	136866	1
136623	GGG	GGC	G	G	Yes	Threonine synthase (EC 4.2.3.1)	135382	136866	1
136630	GCT	ACT	A	T	No	Threonine synthase (EC 4.2.3.1)	135382	136866	1
136662	CCA	CCT	P	P	Yes	Threonine synthase (EC 4.2.3.1)	135382	136866	1
136683	GCC	GCA	A	A	Yes	Threonine synthase (EC 4.2.3.1)	135382	136866	1
136704	AAC	AAA	N	K	No	Threonine synthase (EC 4.2.3.1)	135382	136866	1
136711	TTG	CTG	L	L	Yes	Threonine synthase (EC 4.2.3.1)	135382	136866	1
136716	ACT	ACA	T	T	Yes	Threonine synthase (EC 4.2.3.1)	135382	136866	1
136740	TTA	TTG	L	L	Yes	Threonine synthase (EC 4.2.3.1)	135382	136866	1
136797	CCA	CCG	P	P	Yes	Threonine synthase (EC 4.2.3.1)	135382	136866	1
136849	ACT	GCT	T	A	No	Threonine synthase (EC 4.2.3.1)	135382	136866	1
136875	A	G				Intergenic region
136876	A	C				Intergenic region
136998	CTT	CTC	L	L	Yes	Multi antimicrobial extrusion (MATE) family transporter	136927	138207	1
137004	GGC	GGA	G	G	Yes	Multi antimicrobial extrusion (MATE) family transporter	136927	138207	1
137013	GAT	GAC	D	D	Yes	Multi antimicrobial extrusion (MATE) family transporter	136927	138207	1
137016	AGT	AGC	S	S	Yes	Multi antimicrobial extrusion (MATE) family transporter	136927	138207	1
137028	GCT	GCC	A	A	Yes	Multi antimicrobial extrusion (MATE) family transporter	136927	138207	1
137040	TTA	TTG	L	L	Yes	Multi antimicrobial extrusion (MATE) family transporter	136927	138207	1
137121	ATC	ATT	I	I	Yes	Multi antimicrobial extrusion (MATE) family transporter	136927	138207	1
137148	GGA	GGG	G	G	Yes	Multi antimicrobial extrusion (MATE) family transporter	136927	138207	1
137155	AAT	GAT	N	D	No	Multi antimicrobial extrusion (MATE) family transporter	136927	138207	1
137216	GGG	GCG	G	A	No	Multi antimicrobial extrusion (MATE) family transporter	136927	138207	1
137217	GGG	GGA	G	G	Yes	Multi antimicrobial extrusion (MATE) family transporter	136927	138207	1
137235	TCA	TCG	S	S	Yes	Multi antimicrobial extrusion (MATE) family transporter	136927	138207	1
137265	CTT	CTC	L	L	Yes	Multi antimicrobial extrusion (MATE) family transporter	136927	138207	1
137301	GGG	GGA	G	G	Yes	Multi antimicrobial extrusion (MATE) family transporter	136927	138207	1
137319	GTG	GTA	V	V	Yes	Multi antimicrobial extrusion (MATE) family transporter	136927	138207	1
137322	GGT	GGC	G	G	Yes	Multi antimicrobial extrusion (MATE) family transporter	136927	138207	1
137352	ACC	ACG	T	T	Yes	Multi antimicrobial extrusion (MATE) family transporter	136927	138207	1
137394	CTA	CTG	L	L	Yes	Multi antimicrobial extrusion (MATE) family transporter	136927	138207	1
137406	GTG	GTT	V	V	Yes	Multi antimicrobial extrusion (MATE) family transporter	136927	138207	1
137434	CTT	ATT	L	I	No	Multi antimicrobial extrusion (MATE) family transporter	136927	138207	1
137535	TCG	TCA	S	S	Yes	Multi antimicrobial extrusion (MATE) family transporter	136927	138207	1
137601	TTA	TTG	L	L	Yes	Multi antimicrobial extrusion (MATE) family transporter	136927	138207	1
137691	GGG	GGA	G	G	Yes	Multi antimicrobial extrusion (MATE) family transporter	136927	138207	1
137727	TAC	TAT	Y	Y	Yes	Multi antimicrobial extrusion (MATE) family transporter	136927	138207	1
137757	ACG	ACA	T	T	Yes	Multi antimicrobial extrusion (MATE) family transporter	136927	138207	1
137765	CTG	CAG	L	Q	No	Multi antimicrobial extrusion (MATE) family transporter	136927	138207	1
137991	ATT	ATA	I	I	Yes	Multi antimicrobial extrusion (MATE) family transporter	136927	138207	1
138012	GGT	GGA	G	G	Yes	Multi antimicrobial extrusion (MATE) family transporter	136927	138207	1
138081	GCT	GCC	A	A	Yes	Multi antimicrobial extrusion (MATE) family transporter	136927	138207	1
138087	CTG	CTT	L	L	Yes	Multi antimicrobial extrusion (MATE) family transporter	136927	138207	1
138111	GGC	GGG	G	G	Yes	Multi antimicrobial extrusion (MATE) family transporter	136927	138207	1
138321	GAT	GAC	D	D	Yes	hydrolase, haloacid dehalogenase-like family	138211	138831	1
138887	G	T				Intergenic region
138905	G	A				Intergenic region
138907	T	A				Intergenic region
138946	C	T				Intergenic region
138989	G	A				Intergenic region
139091	ACC	AGC	T	S	No	Group B streptococcal surface immunogenic protein	138997	140208	1
139113	GAC	GAT	D	D	Yes	Group B streptococcal surface immunogenic protein	138997	140208	1
139194	GTT	GTA	V	V	Yes	Group B streptococcal surface immunogenic protein	138997	140208	1
139230	ACC	ACT	T	T	Yes	Group B streptococcal surface immunogenic protein	138997	140208	1
139283	GCA	GAA	A	E	No	Group B streptococcal surface immunogenic protein	138997	140208	1
139311	CAG	CAA	Q	Q	Yes	Group B streptococcal surface immunogenic protein	138997	140208	1
139314	ACA	ACT	T	T	Yes	Group B streptococcal surface immunogenic protein	138997	140208	1
139323	GCA	GCG	A	A	Yes	Group B streptococcal surface immunogenic protein	138997	140208	1
139442	GCA	GTA	A	V	No	Group B streptococcal surface immunogenic protein	138997	140208	1
139451	AAT	ACT	N	T	No	Group B streptococcal surface immunogenic protein	138997	140208	1
139499	GGG	GCG	G	A	No	Group B streptococcal surface immunogenic protein	138997	140208	1
139812	ACA	ACG	T	T	Yes	Group B streptococcal surface immunogenic protein	138997	140208	1
139816	TCA	GCT	S	A	No	Group B streptococcal surface immunogenic protein	138997	140208	1
139818	A	T	Merged with SNP 139816
139890	ACT	ACA	T	T	Yes	Group B streptococcal surface immunogenic protein	138997	140208	1
139893	GCA	GCG	A	A	Yes	Group B streptococcal surface immunogenic protein	138997	140208	1
139926	GGG	GGA	G	G	Yes	Group B streptococcal surface immunogenic protein	138997	140208	1
139935	TCC	TCT	S	S	Yes	Group B streptococcal surface immunogenic protein	138997	140208	1
139995	TTC	TTT	F	F	Yes	Group B streptococcal surface immunogenic protein	138997	140208	1
140951	ACA	ACG	T	T	Yes	membrane protein	140387	141244	-1
140987	GCT	GCC	A	A	Yes	membrane protein	140387	141244	-1
140997	GCA	GTA	A	V	No	membrane protein	140387	141244	-1
141026	GTG	GTA	V	V	Yes	membrane protein	140387	141244	-1
141032	CCA	CCG	P	P	Yes	membrane protein	140387	141244	-1
141053	GTG	GTT	V	V	Yes	membrane protein	140387	141244	-1
141131	TTA	TTG	L	L	Yes	membrane protein	140387	141244	-1
141137	GTC	GTT	V	V	Yes	membrane protein	140387	141244	-1
141164	CTC	CTG	L	L	Yes	membrane protein	140387	141244	-1
141194	CAG	CAA	Q	Q	Yes	membrane protein	140387	141244	-1
141200	ACG	GCT	T	A	No	membrane protein	140387	141244	-1
141202	T	C	Merged with SNP 141200
141215	ACC	ACT	T	T	Yes	membrane protein	140387	141244	-1
141277	T	A				Intergenic region
141315	A	G				Intergenic region
141672	TCC	TCT	S	S	Yes	tRNA-guanine transglycosylase (EC 2.4.2.29)	141361	142503	1
141678	GCA	GCG	A	A	Yes	tRNA-guanine transglycosylase (EC 2.4.2.29)	141361	142503	1
141684	AGC	AGT	S	S	Yes	tRNA-guanine transglycosylase (EC 2.4.2.29)	141361	142503	1
141804	TCT	TCC	S	S	Yes	tRNA-guanine transglycosylase (EC 2.4.2.29)	141361	142503	1
141909	CCA	CCG	P	P	Yes	tRNA-guanine transglycosylase (EC 2.4.2.29)	141361	142503	1
141936	GTA	GTG	V	V	Yes	tRNA-guanine transglycosylase (EC 2.4.2.29)	141361	142503	1
142005	GGT	GGC	G	G	Yes	tRNA-guanine transglycosylase (EC 2.4.2.29)	141361	142503	1
142092	AAT	AAC	N	N	Yes	tRNA-guanine transglycosylase (EC 2.4.2.29)	141361	142503	1
142116	GTG	GTC	V	V	Yes	tRNA-guanine transglycosylase (EC 2.4.2.29)	141361	142503	1
142125	CCG	CCA	P	P	Yes	tRNA-guanine transglycosylase (EC 2.4.2.29)	141361	142503	1
142218	AGC	AGT	S	S	Yes	tRNA-guanine transglycosylase (EC 2.4.2.29)	141361	142503	1
142245	GCA	GCC	A	A	Yes	tRNA-guanine transglycosylase (EC 2.4.2.29)	141361	142503	1
142284	TGT	TGC	C	C	Yes	tRNA-guanine transglycosylase (EC 2.4.2.29)	141361	142503	1
142434	GAT	GAC	D	D	Yes	tRNA-guanine transglycosylase (EC 2.4.2.29)	141361	142503	1
142440	CTA	CTC	L	L	Yes	tRNA-guanine transglycosylase (EC 2.4.2.29)	141361	142503	1
142449	TTC	TTT	F	F	Yes	tRNA-guanine transglycosylase (EC 2.4.2.29)	141361	142503	1
142464	GTG	GTA	V	V	Yes	tRNA-guanine transglycosylase (EC 2.4.2.29)	141361	142503	1
142513	T	A				Intergenic region
142598	C	T				Intergenic region
142726	GGC	GGA	G	G	Yes	Acyltransferase family	142637	144454	1
142816	GAC	GAT	D	D	Yes	Acyltransferase family	142637	144454	1
142819	TTA	TTG	L	L	Yes	Acyltransferase family	142637	144454	1
143092	TTC	TTT	F	F	Yes	Acyltransferase family	142637	144454	1
143134	ATA	ATG	I	M	No	Acyltransferase family	142637	144454	1
143152	GCA	GCT	A	A	Yes	Acyltransferase family	142637	144454	1
143203	GCT	GCG	A	A	Yes	Acyltransferase family	142637	144454	1
143236	TTA	TTG	L	L	Yes	Acyltransferase family	142637	144454	1
143278	ACA	ACG	T	T	Yes	Acyltransferase family	142637	144454	1
143328	ATG	ACG	M	T	No	Acyltransferase family	142637	144454	1
143329	ATG	ATA	M	I	No	Acyltransferase family	142637	144454	1
143335	GAC	GAT	D	D	Yes	Acyltransferase family	142637	144454	1
143336	CTT	ATT	L	I	No	Acyltransferase family	142637	144454	1
143344	CAA	CAG	Q	Q	Yes	Acyltransferase family	142637	144454	1
143380	TTG	TTA	L	L	Yes	Acyltransferase family	142637	144454	1
143392	ACT	ACC	T	T	Yes	Acyltransferase family	142637	144454	1
143404	AAA	AAG	K	K	Yes	Acyltransferase family	142637	144454	1
143407	TTT	TTC	F	F	Yes	Acyltransferase family	142637	144454	1
143545	ACT	ACC	T	T	Yes	Acyltransferase family	142637	144454	1
143563	CTT	CTC	L	L	Yes	Acyltransferase family	142637	144454	1
143597	CTG	TTG	L	L	Yes	Acyltransferase family	142637	144454	1
143632	ATC	ATT	I	I	Yes	Acyltransferase family	142637	144454	1
143680	CCG	CCA	P	P	Yes	Acyltransferase family	142637	144454	1
143731	CCT	CCC	P	P	Yes	Acyltransferase family	142637	144454	1
143753	GGT	ACT	G	T	No	Acyltransferase family	142637	144454	1
143754	G	C	Merged with SNP 143753
143757	GCT	GGT	A	G	No	Acyltransferase family	142637	144454	1
143781	ACC	AGC	T	S	No	Acyltransferase family	142637	144454	1
143938	CTA	CTG	L	L	Yes	Acyltransferase family	142637	144454	1
143998	GCG	GCA	A	A	Yes	Acyltransferase family	142637	144454	1
144010	GCC	GCT	A	A	Yes	Acyltransferase family	142637	144454	1
144046	ATC	ATT	I	I	Yes	Acyltransferase family	142637	144454	1
144085	ACA	ACT	T	T	Yes	Acyltransferase family	142637	144454	1
144088	GTC	GTT	V	V	Yes	Acyltransferase family	142637	144454	1
144109	AAC	AAT	N	N	Yes	Acyltransferase family	142637	144454	1
144121	GGT	GGC	G	G	Yes	Acyltransferase family	142637	144454	1
144133	GAT	GAC	D	D	Yes	Acyltransferase family	142637	144454	1
144152	CAT	AAT	H	N	No	Acyltransferase family	142637	144454	1
144208	AGC	AGT	S	S	Yes	Acyltransferase family	142637	144454	1
144232	GAA	GAG	E	E	Yes	Acyltransferase family	142637	144454	1
144251	AGA	CGG	R	R	Yes	Acyltransferase family	142637	144454	1
144253	A	G	Merged with SNP 144251
144337	ACT	ACC	T	T	Yes	Acyltransferase family	142637	144454	1
144346	GTT	GTC	V	V	Yes	Acyltransferase family	142637	144454	1
144355	GGA	GGG	G	G	Yes	Acyltransferase family	142637	144454	1
144359	AAT	GAT	N	D	No	Acyltransferase family	142637	144454	1
144436	CTA	CTG	L	L	Yes	Acyltransferase family	142637	144454	1
144455	A	G				Intergenic region
144458	T	C				Intergenic region
144684	GGC	GGT	G	G	Yes	N-acetylglucosamine-6-phosphate deacetylase (EC 3.5.1.25)	144595	145746	1
144732	ACA	ACC	T	T	Yes	N-acetylglucosamine-6-phosphate deacetylase (EC 3.5.1.25)	144595	145746	1
144768	CAC	CAT	H	H	Yes	N-acetylglucosamine-6-phosphate deacetylase (EC 3.5.1.25)	144595	145746	1
144783	GGC	GGT	G	G	Yes	N-acetylglucosamine-6-phosphate deacetylase (EC 3.5.1.25)	144595	145746	1
144789	GTG	GTC	V	V	Yes	N-acetylglucosamine-6-phosphate deacetylase (EC 3.5.1.25)	144595	145746	1
144801	GAC	GAT	D	D	Yes	N-acetylglucosamine-6-phosphate deacetylase (EC 3.5.1.25)	144595	145746	1
144828	ACC	ACT	T	T	Yes	N-acetylglucosamine-6-phosphate deacetylase (EC 3.5.1.25)	144595	145746	1
144879	ACC	ACG	T	T	Yes	N-acetylglucosamine-6-phosphate deacetylase (EC 3.5.1.25)	144595	145746	1
144888	TCC	TCT	S	S	Yes	N-acetylglucosamine-6-phosphate deacetylase (EC 3.5.1.25)	144595	145746	1
144927	GGC	GGT	G	G	Yes	N-acetylglucosamine-6-phosphate deacetylase (EC 3.5.1.25)	144595	145746	1
144966	GGG	GGA	G	G	Yes	N-acetylglucosamine-6-phosphate deacetylase (EC 3.5.1.25)	144595	145746	1
144981	GGA	GGG	G	G	Yes	N-acetylglucosamine-6-phosphate deacetylase (EC 3.5.1.25)	144595	145746	1
145074	GCA	GCT	A	A	Yes	N-acetylglucosamine-6-phosphate deacetylase (EC 3.5.1.25)	144595	145746	1
145141	GTT	ATT	V	I	No	N-acetylglucosamine-6-phosphate deacetylase (EC 3.5.1.25)	144595	145746	1
145161	ACC	ACT	T	T	Yes	N-acetylglucosamine-6-phosphate deacetylase (EC 3.5.1.25)	144595	145746	1
145179	TCC	TCA	S	S	Yes	N-acetylglucosamine-6-phosphate deacetylase (EC 3.5.1.25)	144595	145746	1
145227	AGT	AGC	S	S	Yes	N-acetylglucosamine-6-phosphate deacetylase (EC 3.5.1.25)	144595	145746	1
145251	GGG	GGA	G	G	Yes	N-acetylglucosamine-6-phosphate deacetylase (EC 3.5.1.25)	144595	145746	1
145302	GAA	GAG	E	E	Yes	N-acetylglucosamine-6-phosphate deacetylase (EC 3.5.1.25)	144595	145746	1
145314	ACT	ACC	T	T	Yes	N-acetylglucosamine-6-phosphate deacetylase (EC 3.5.1.25)	144595	145746	1
145317	TAC	TAT	Y	Y	Yes	N-acetylglucosamine-6-phosphate deacetylase (EC 3.5.1.25)	144595	145746	1
145425	GCG	GCT	A	A	Yes	N-acetylglucosamine-6-phosphate deacetylase (EC 3.5.1.25)	144595	145746	1
145431	GGA	GGC	G	G	Yes	N-acetylglucosamine-6-phosphate deacetylase (EC 3.5.1.25)	144595	145746	1
145440	GAC	GAT	D	D	Yes	N-acetylglucosamine-6-phosphate deacetylase (EC 3.5.1.25)	144595	145746	1
145473	GTT	GTA	V	V	Yes	N-acetylglucosamine-6-phosphate deacetylase (EC 3.5.1.25)	144595	145746	1
145503	TCG	TCT	S	S	Yes	N-acetylglucosamine-6-phosphate deacetylase (EC 3.5.1.25)	144595	145746	1
145524	TCA	TCT	S	S	Yes	N-acetylglucosamine-6-phosphate deacetylase (EC 3.5.1.25)	144595	145746	1
145530	CTC	CTT	L	L	Yes	N-acetylglucosamine-6-phosphate deacetylase (EC 3.5.1.25)	144595	145746	1
145551	AAA	AAG	K	K	Yes	N-acetylglucosamine-6-phosphate deacetylase (EC 3.5.1.25)	144595	145746	1
145668	GAC	GAT	D	D	Yes	N-acetylglucosamine-6-phosphate deacetylase (EC 3.5.1.25)	144595	145746	1
145671	GCT	GCC	A	A	Yes	N-acetylglucosamine-6-phosphate deacetylase (EC 3.5.1.25)	144595	145746	1
145686	CTA	CTG	L	L	Yes	N-acetylglucosamine-6-phosphate deacetylase (EC 3.5.1.25)	144595	145746	1
145749	A	T				Intergenic region
145857	T	A				Intergenic region
146065	AAG	AAA	K	K	Yes	DNA binding protein, FIG046916	145901	146266	1
146089	ATC	ATT	I	I	Yes	DNA binding protein, FIG046916	145901	146266	1
146104	GCT	GCC	A	A	Yes	DNA binding protein, FIG046916	145901	146266	1
146107	GAT	GAC	D	D	Yes	DNA binding protein, FIG046916	145901	146266	1
146108	AAA	CAA	K	Q	No	DNA binding protein, FIG046916	145901	146266	1
146236	AAG	AAA	K	K	Yes	DNA binding protein, FIG046916	145901	146266	1
146239	CAT	CAC	H	H	Yes	DNA binding protein, FIG046916	145901	146266	1
146379	GCA	GAA	A	E	No	Late competence protein ComGA, access of DNA to ComEA	146336	147277	1
146425	TAT	TAC	Y	Y	Yes	Late competence protein ComGA, access of DNA to ComEA	146336	147277	1
146441	GTT	ATT	V	I	No	Late competence protein ComGA, access of DNA to ComEA	146336	147277	1
146451	GCG	GAG	A	E	No	Late competence protein ComGA, access of DNA to ComEA	146336	147277	1
146614	GTA	GTG	V	V	Yes	Late competence protein ComGA, access of DNA to ComEA	146336	147277	1
146662	GAC	GAT	D	D	Yes	Late competence protein ComGA, access of DNA to ComEA	146336	147277	1
146665	GAA	GAG	E	E	Yes	Late competence protein ComGA, access of DNA to ComEA	146336	147277	1
146701	AAT	AAC	N	N	Yes	Late competence protein ComGA, access of DNA to ComEA	146336	147277	1
146818	GTT	GTC	V	V	Yes	Late competence protein ComGA, access of DNA to ComEA	146336	147277	1
146827	ATC	ATT	I	I	Yes	Late competence protein ComGA, access of DNA to ComEA	146336	147277	1
146842	GAA	GAG	E	E	Yes	Late competence protein ComGA, access of DNA to ComEA	146336	147277	1
146890	GGC	GGT	G	G	Yes	Late competence protein ComGA, access of DNA to ComEA	146336	147277	1
146908	CTG	CTC	L	L	Yes	Late competence protein ComGA, access of DNA to ComEA	146336	147277	1
146935	CCG	CCT	P	P	Yes	Late competence protein ComGA, access of DNA to ComEA	146336	147277	1
146962	CGT	CGG	R	R	Yes	Late competence protein ComGA, access of DNA to ComEA	146336	147277	1
146965	GAC	GAT	D	D	Yes	Late competence protein ComGA, access of DNA to ComEA	146336	147277	1
146974	ACA	ACG	T	T	Yes	Late competence protein ComGA, access of DNA to ComEA	146336	147277	1
147034	GCT	GCC	A	A	Yes	Late competence protein ComGA, access of DNA to ComEA	146336	147277	1
147073	TTG	TTA	L	L	Yes	Late competence protein ComGA, access of DNA to ComEA	146336	147277	1
147076	GGG	GGT	G	G	Yes	Late competence protein ComGA, access of DNA to ComEA	146336	147277	1
147088	GAG	GAA	E	E	Yes	Late competence protein ComGA, access of DNA to ComEA	146336	147277	1
147171	TAT	TTT	Y	F	No	Late competence protein ComGA, access of DNA to ComEA	146336	147277	1
147190	ACC	ACT	T	T	Yes	Late competence protein ComGA, access of DNA to ComEA	146336	147277	1
147201	GAA	GCA	E	A	No	Late competence protein ComGA, access of DNA to ComEA	146336	147277	1
147202	GAA	GAG	E	E	Yes	Late competence protein ComGA, access of DNA to ComEA	146336	147277	1
147308	T	C				Intergenic region
147314	C	T				Intergenic region
147338	GAT	GAA	D	E	No	Late competence protein ComGB, access of DNA to ComEA	147333	148241	1
147350	TTC	TTT	F	F	Yes	Late competence protein ComGB, access of DNA to ComEA	147333	148241	1
147356	GGA	GGC	G	G	Yes	Late competence protein ComGB, access of DNA to ComEA	147333	148241	1
147371	CTA	CTG	L	L	Yes	Late competence protein ComGB, access of DNA to ComEA	147333	148241	1
147391	CAG	CGG	Q	R	No	Late competence protein ComGB, access of DNA to ComEA	147333	148241	1
147408	GCT	TCT	A	S	No	Late competence protein ComGB, access of DNA to ComEA	147333	148241	1
147449	GGC	GGG	G	G	Yes	Late competence protein ComGB, access of DNA to ComEA	147333	148241	1
147473	CAG	CAA	Q	Q	Yes	Late competence protein ComGB, access of DNA to ComEA	147333	148241	1
147491	GTG	GTA	V	V	Yes	Late competence protein ComGB, access of DNA to ComEA	147333	148241	1
147497	GGA	GGG	G	G	Yes	Late competence protein ComGB, access of DNA to ComEA	147333	148241	1
147513	CTG	TTG	L	L	Yes	Late competence protein ComGB, access of DNA to ComEA	147333	148241	1
[truncated: 24,223 more rows]

## Sheet: Streptococcus GMD-3
SNP_position	Ref_codon	Sub_codon	aa_Ref	aa_Sub	Synonymous	Product	CDS_start	CDS_end	CDS_strand
24	C	T				Intergenic region
27	G	A				Intergenic region
60	ACT	ACC	T	T	Yes	Chromosomal replication initiator protein DnaA	43	651	1
111	CAT	CAC	H	H	Yes	Chromosomal replication initiator protein DnaA	43	651	1
141	CTG	CTA	L	L	Yes	Chromosomal replication initiator protein DnaA	43	651	1
147	TAT	TAC	Y	Y	Yes	Chromosomal replication initiator protein DnaA	43	651	1
156	GGT	GGC	G	G	Yes	Chromosomal replication initiator protein DnaA	43	651	1
372	GGA	GGG	G	G	Yes	Chromosomal replication initiator protein DnaA	43	651	1
402	GCG	GCA	A	A	Yes	Chromosomal replication initiator protein DnaA	43	651	1
420	TAC	TAT	Y	Y	Yes	Chromosomal replication initiator protein DnaA	43	651	1
471	TTC	TTT	F	F	Yes	Chromosomal replication initiator protein DnaA	43	651	1
474	GGA	GGT	G	G	Yes	Chromosomal replication initiator protein DnaA	43	651	1
480	AAA	AAG	K	K	Yes	Chromosomal replication initiator protein DnaA	43	651	1
495	GTT	GTG	V	V	Yes	Chromosomal replication initiator protein DnaA	43	651	1
530	GTA	GGA	V	G	No	Chromosomal replication initiator protein DnaA	43	651	1
749	GGT	GGG	G	G	Yes	GTP-binding and nucleic acid-binding protein YchF	615	1697	1
782	GAC	GAT	D	D	Yes	GTP-binding and nucleic acid-binding protein YchF	615	1697	1
797	GTA	GTT	V	V	Yes	GTP-binding and nucleic acid-binding protein YchF	615	1697	1
800	GTT	GTA	V	V	Yes	GTP-binding and nucleic acid-binding protein YchF	615	1697	1
824	GTG	GTT	V	V	Yes	GTP-binding and nucleic acid-binding protein YchF	615	1697	1
893	GAA	GAG	E	E	Yes	GTP-binding and nucleic acid-binding protein YchF	615	1697	1
971	AAA	AAG	K	K	Yes	GTP-binding and nucleic acid-binding protein YchF	615	1697	1
1022	GAG	GAA	E	E	Yes	GTP-binding and nucleic acid-binding protein YchF	615	1697	1
1130	GCT	GCA	A	A	Yes	GTP-binding and nucleic acid-binding protein YchF	615	1697	1
1133	CGC	CGT	R	R	Yes	GTP-binding and nucleic acid-binding protein YchF	615	1697	1
1139	ATC	ATT	I	I	Yes	GTP-binding and nucleic acid-binding protein YchF	615	1697	1
1145	TTT	TTC	F	F	Yes	GTP-binding and nucleic acid-binding protein YchF	615	1697	1
1157	GAA	GAG	E	E	Yes	GTP-binding and nucleic acid-binding protein YchF	615	1697	1
1163	AAG	AAA	K	K	Yes	GTP-binding and nucleic acid-binding protein YchF	615	1697	1
1166	GTT	GTA	V	V	Yes	GTP-binding and nucleic acid-binding protein YchF	615	1697	1
1187	TTG	TTA	L	L	Yes	GTP-binding and nucleic acid-binding protein YchF	615	1697	1
1232	GTT	GTA	V	V	Yes	GTP-binding and nucleic acid-binding protein YchF	615	1697	1
1236	GGA	TCA	G	S	No	GTP-binding and nucleic acid-binding protein YchF	615	1697	1
1237	G	C	Merged with SNP 1236
1241	GAC	GAT	D	D	Yes	GTP-binding and nucleic acid-binding protein YchF	615	1697	1
1307	GTC	GTA	V	V	Yes	GTP-binding and nucleic acid-binding protein YchF	615	1697	1
1316	TCC	TCT	S	S	Yes	GTP-binding and nucleic acid-binding protein YchF	615	1697	1
1349	GAC	GAT	D	D	Yes	GTP-binding and nucleic acid-binding protein YchF	615	1697	1
1355	GAG	GAA	E	E	Yes	GTP-binding and nucleic acid-binding protein YchF	615	1697	1
1400	GGC	GGT	G	G	Yes	GTP-binding and nucleic acid-binding protein YchF	615	1697	1
1516	GCA	GTA	A	V	No	GTP-binding and nucleic acid-binding protein YchF	615	1697	1
1550	GGG	GGC	G	G	Yes	GTP-binding and nucleic acid-binding protein YchF	615	1697	1
1625	GGG	GGA	G	G	Yes	GTP-binding and nucleic acid-binding protein YchF	615	1697	1
1701	T	C				Intergenic region
1776	ACC	ACT	T	T	Yes	Peptidyl-tRNA hydrolase (EC 3.1.1.29)	1771	2340	1
1788	GTA	GTT	V	V	Yes	Peptidyl-tRNA hydrolase (EC 3.1.1.29)	1771	2340	1
1794	TTG	TTA	L	L	Yes	Peptidyl-tRNA hydrolase (EC 3.1.1.29)	1771	2340	1
1821	GAA	GAG	E	E	Yes	Peptidyl-tRNA hydrolase (EC 3.1.1.29)	1771	2340	1
1878	GTC	GTT	V	V	Yes	Peptidyl-tRNA hydrolase (EC 3.1.1.29)	1771	2340	1
1950	CTC	CTG	L	L	Yes	Peptidyl-tRNA hydrolase (EC 3.1.1.29)	1771	2340	1
2052	GAT	GAC	D	D	Yes	Peptidyl-tRNA hydrolase (EC 3.1.1.29)	1771	2340	1
2067	GTT	GTC	V	V	Yes	Peptidyl-tRNA hydrolase (EC 3.1.1.29)	1771	2340	1
2094	GGG	GGA	G	G	Yes	Peptidyl-tRNA hydrolase (EC 3.1.1.29)	1771	2340	1
2100	GCT	GCG	A	A	Yes	Peptidyl-tRNA hydrolase (EC 3.1.1.29)	1771	2340	1
2139	ATA	ATT	I	I	Yes	Peptidyl-tRNA hydrolase (EC 3.1.1.29)	1771	2340	1
2142	GGT	GGA	G	G	Yes	Peptidyl-tRNA hydrolase (EC 3.1.1.29)	1771	2340	1
2148	CAG	CAA	Q	Q	Yes	Peptidyl-tRNA hydrolase (EC 3.1.1.29)	1771	2340	1
2149	ATA	GTA	I	V	No	Peptidyl-tRNA hydrolase (EC 3.1.1.29)	1771	2340	1
2199	TCC	TCG	S	S	Yes	Peptidyl-tRNA hydrolase (EC 3.1.1.29)	1771	2340	1
2206	CAT	AAT	H	N	No	Peptidyl-tRNA hydrolase (EC 3.1.1.29)	1771	2340	1
2229	GAT	GAA	D	E	No	Peptidyl-tRNA hydrolase (EC 3.1.1.29)	1771	2340	1
2259	TCC	TCT	S	S	Yes	Peptidyl-tRNA hydrolase (EC 3.1.1.29)	1771	2340	1
2334	AAC	AAT	N	N	Yes	Peptidyl-tRNA hydrolase (EC 3.1.1.29)	1771	2340	1
2337	GGC	GGT	G	G	Yes	Peptidyl-tRNA hydrolase (EC 3.1.1.29)	1771	2340	1
2376	GAC	GAT	D	D	Yes	Transcription-repair coupling factor	2341	5844	1
2455	ATT	CTT	I	L	No	Transcription-repair coupling factor	2341	5844	1
2472	AGT	AGC	S	S	Yes	Transcription-repair coupling factor	2341	5844	1
2577	CCA	CCT	P	P	Yes	Transcription-repair coupling factor	2341	5844	1
2586	GTT	GTC	V	V	Yes	Transcription-repair coupling factor	2341	5844	1
2592	GAC	GAT	D	D	Yes	Transcription-repair coupling factor	2341	5844	1
2649	GAG	GAA	E	E	Yes	Transcription-repair coupling factor	2341	5844	1
2666	AGT	AAT	S	N	No	Transcription-repair coupling factor	2341	5844	1
2673	CCG	CCA	P	P	Yes	Transcription-repair coupling factor	2341	5844	1
2686	ATT	GTT	I	V	No	Transcription-repair coupling factor	2341	5844	1
2703	ATC	ATT	I	I	Yes	Transcription-repair coupling factor	2341	5844	1
2769	GTT	GTC	V	V	Yes	Transcription-repair coupling factor	2341	5844	1
2772	GGC	GGT	G	G	Yes	Transcription-repair coupling factor	2341	5844	1
2804	CAG	CGG	Q	R	No	Transcription-repair coupling factor	2341	5844	1
2820	GGC	GGA	G	G	Yes	Transcription-repair coupling factor	2341	5844	1
2843	CGG	CAG	R	Q	No	Transcription-repair coupling factor	2341	5844	1
2874	GAT	GAC	D	D	Yes	Transcription-repair coupling factor	2341	5844	1
2994	ACC	ACA	T	T	Yes	Transcription-repair coupling factor	2341	5844	1
3120	GAG	GAT	E	D	No	Transcription-repair coupling factor	2341	5844	1
3190	GAA	AAA	E	K	No	Transcription-repair coupling factor	2341	5844	1
3193	ACA	GCA	T	A	No	Transcription-repair coupling factor	2341	5844	1
3274	TCC	GCC	S	A	No	Transcription-repair coupling factor	2341	5844	1
3336	TCT	TCC	S	S	Yes	Transcription-repair coupling factor	2341	5844	1
3338	GGG	GAG	G	E	No	Transcription-repair coupling factor	2341	5844	1
3402	TCC	TCT	S	S	Yes	Transcription-repair coupling factor	2341	5844	1
3426	AAT	AAC	N	N	Yes	Transcription-repair coupling factor	2341	5844	1
3429	CTT	CTC	L	L	Yes	Transcription-repair coupling factor	2341	5844	1
3465	CCC	CCA	P	P	Yes	Transcription-repair coupling factor	2341	5844	1
3529	AAC	GAC	N	D	No	Transcription-repair coupling factor	2341	5844	1
3541	ATT	GTT	I	V	No	Transcription-repair coupling factor	2341	5844	1
3573	AAG	AAA	K	K	Yes	Transcription-repair coupling factor	2341	5844	1
3576	ACG	ACA	T	T	Yes	Transcription-repair coupling factor	2341	5844	1
3582	GAA	GAG	E	E	Yes	Transcription-repair coupling factor	2341	5844	1
3620	AGA	AAA	R	K	No	Transcription-repair coupling factor	2341	5844	1
3687	CAC	CAT	H	H	Yes	Transcription-repair coupling factor	2341	5844	1
3749	CGT	CAT	R	H	No	Transcription-repair coupling factor	2341	5844	1
3757	AGA	CGA	R	R	Yes	Transcription-repair coupling factor	2341	5844	1
3819	GAC	GAT	D	D	Yes	Transcription-repair coupling factor	2341	5844	1
3822	TAC	TAT	Y	Y	Yes	Transcription-repair coupling factor	2341	5844	1
3864	ATT	ATC	I	I	Yes	Transcription-repair coupling factor	2341	5844	1
3880	AAA	CAA	K	Q	No	Transcription-repair coupling factor	2341	5844	1
3885	GGG	GGC	G	G	Yes	Transcription-repair coupling factor	2341	5844	1
3909	GTT	GTA	V	V	Yes	Transcription-repair coupling factor	2341	5844	1
3912	CAA	CAG	Q	Q	Yes	Transcription-repair coupling factor	2341	5844	1
3991	GCT	CCT	A	P	No	Transcription-repair coupling factor	2341	5844	1
3996	CCA	CCT	P	P	Yes	Transcription-repair coupling factor	2341	5844	1
4002	CTT	CTC	L	L	Yes	Transcription-repair coupling factor	2341	5844	1
4017	GAT	GAC	D	D	Yes	Transcription-repair coupling factor	2341	5844	1
4086	AAG	AAA	K	K	Yes	Transcription-repair coupling factor	2341	5844	1
4089	CTT	CTG	L	L	Yes	Transcription-repair coupling factor	2341	5844	1
4116	GGA	GGT	G	G	Yes	Transcription-repair coupling factor	2341	5844	1
4128	TCG	TCA	S	S	Yes	Transcription-repair coupling factor	2341	5844	1
4212	ATT	ATC	I	I	Yes	Transcription-repair coupling factor	2341	5844	1
4218	AGG	AGA	R	R	Yes	Transcription-repair coupling factor	2341	5844	1
4236	CAT	CAC	H	H	Yes	Transcription-repair coupling factor	2341	5844	1
4252	CTG	TTG	L	L	Yes	Transcription-repair coupling factor	2341	5844	1
4260	GGG	GGA	G	G	Yes	Transcription-repair coupling factor	2341	5844	1
4284	GAG	GAA	E	E	Yes	Transcription-repair coupling factor	2341	5844	1
4287	GTT	GTA	V	V	Yes	Transcription-repair coupling factor	2341	5844	1
4299	GCA	GCT	A	A	Yes	Transcription-repair coupling factor	2341	5844	1
4302	GCA	GCT	A	A	Yes	Transcription-repair coupling factor	2341	5844	1
4311	GCT	GCA	A	A	Yes	Transcription-repair coupling factor	2341	5844	1
4335	GTT	GTC	V	V	Yes	Transcription-repair coupling factor	2341	5844	1
4347	CCG	CCA	P	P	Yes	Transcription-repair coupling factor	2341	5844	1
4578	TTC	TTT	F	F	Yes	Transcription-repair coupling factor	2341	5844	1
4584	GTT	GTC	V	V	Yes	Transcription-repair coupling factor	2341	5844	1
4653	ATC	ATT	I	I	Yes	Transcription-repair coupling factor	2341	5844	1
4686	ATT	ATC	I	I	Yes	Transcription-repair coupling factor	2341	5844	1
4810	GTT	ATT	V	I	No	Transcription-repair coupling factor	2341	5844	1
4830	AAA	AAG	K	K	Yes	Transcription-repair coupling factor	2341	5844	1
4857	TCA	TCG	S	S	Yes	Transcription-repair coupling factor	2341	5844	1
4926	TTA	TTG	L	L	Yes	Transcription-repair coupling factor	2341	5844	1
4932	AAT	AAC	N	N	Yes	Transcription-repair coupling factor	2341	5844	1
4941	CTT	CTG	L	L	Yes	Transcription-repair coupling factor	2341	5844	1
5046	CAC	CAT	H	H	Yes	Transcription-repair coupling factor	2341	5844	1
5052	GGC	GGT	G	G	Yes	Transcription-repair coupling factor	2341	5844	1
5235	CGG	CGT	R	R	Yes	Transcription-repair coupling factor	2341	5844	1
5259	AAG	AAA	K	K	Yes	Transcription-repair coupling factor	2341	5844	1
5262	TCC	TCG	S	S	Yes	Transcription-repair coupling factor	2341	5844	1
5304	TCG	TCA	S	S	Yes	Transcription-repair coupling factor	2341	5844	1
5311	CTA	TTA	L	L	Yes	Transcription-repair coupling factor	2341	5844	1
5340	GGC	GGT	G	G	Yes	Transcription-repair coupling factor	2341	5844	1
5357	AGC	ATC	S	I	No	Transcription-repair coupling factor	2341	5844	1
5391	GAC	GAT	D	D	Yes	Transcription-repair coupling factor	2341	5844	1
5394	GCC	GCT	A	A	Yes	Transcription-repair coupling factor	2341	5844	1
5406	GAC	GAT	D	D	Yes	Transcription-repair coupling factor	2341	5844	1
5499	GAA	GAG	E	E	Yes	Transcription-repair coupling factor	2341	5844	1
5508	GAT	GAC	D	D	Yes	Transcription-repair coupling factor	2341	5844	1
5535	GTG	GTA	V	V	Yes	Transcription-repair coupling factor	2341	5844	1
5538	GCC	GCA	A	A	Yes	Transcription-repair coupling factor	2341	5844	1
5541	TAT	TAC	Y	Y	Yes	Transcription-repair coupling factor	2341	5844	1
5562	GTC	GTT	V	V	Yes	Transcription-repair coupling factor	2341	5844	1
5685	TCC	TCT	S	S	Yes	Transcription-repair coupling factor	2341	5844	1
5704	TCC	GCT	S	A	No	Transcription-repair coupling factor	2341	5844	1
5706	C	T	Merged with SNP 5704
5721	AAA	AAG	K	K	Yes	Transcription-repair coupling factor	2341	5844	1
5737	ATA	GTA	I	V	No	Transcription-repair coupling factor	2341	5844	1
5916	AAA	AAG	K	K	Yes	S4-domain-containing heat shock protein; S4-domain-containing heat shock protein	5902	6168	1
5994	AAC	AAT	N	N	Yes	S4-domain-containing heat shock protein; S4-domain-containing heat shock protein	5902	6168	1
6087	GAT	GAA	D	E	No	S4-domain-containing heat shock protein; S4-domain-containing heat shock protein	5902	6168	1
6114	GAT	GAC	D	D	Yes	S4-domain-containing heat shock protein; S4-domain-containing heat shock protein	5902	6168	1
6123	GGT	GGC	G	G	Yes	S4-domain-containing heat shock protein; S4-domain-containing heat shock protein	5902	6168	1
6319	GCC	GCT	A	A	Yes	Cell division protein DivIC	6161	6529	1
6340	CTG	CTA	L	L	Yes	Cell division protein DivIC	6161	6529	1
6346	CGA	CGC	R	R	Yes	Cell division protein DivIC	6161	6529	1
6358	TTA	TTG	L	L	Yes	Cell division protein DivIC	6161	6529	1
6394	GAT	GAC	D	D	Yes	Cell division protein DivIC	6161	6529	1
6412	TCC	TCT	S	S	Yes	Cell division protein DivIC	6161	6529	1
6415	GCC	GCT	A	A	Yes	Cell division protein DivIC	6161	6529	1
6454	AAG	AAA	K	K	Yes	Cell division protein DivIC	6161	6529	1
6567	CTA	TTA	L	L	Yes	FIG01114659: hypothetical protein	6534	6656	1
6603	ACT	GCT	T	A	No	FIG01114659: hypothetical protein	6534	6656	1
6696	ACC	ACT	T	T	Yes	FIG01114299: hypothetical protein	6649	7917	1
6759	ACC	ACA	T	T	Yes	FIG01114299: hypothetical protein	6649	7917	1
6813	TAT	TAC	Y	Y	Yes	FIG01114299: hypothetical protein	6649	7917	1
6831	TAT	TAC	Y	Y	Yes	FIG01114299: hypothetical protein	6649	7917	1
6878	ACC	AAC	T	N	No	FIG01114299: hypothetical protein	6649	7917	1
6880	ACC	GCC	T	A	No	FIG01114299: hypothetical protein	6649	7917	1
6891	ATA	ATC	I	I	Yes	FIG01114299: hypothetical protein	6649	7917	1
6969	CGG	CGC	R	R	Yes	FIG01114299: hypothetical protein	6649	7917	1
6972	TTG	TTA	L	L	Yes	FIG01114299: hypothetical protein	6649	7917	1
7025	CAG	CCG	Q	P	No	FIG01114299: hypothetical protein	6649	7917	1
7026	CAG	CAA	Q	Q	Yes	FIG01114299: hypothetical protein	6649	7917	1
7057	GCG	ACT	A	T	No	FIG01114299: hypothetical protein	6649	7917	1
7059	G	T	Merged with SNP 7057
7075	ACC	TCC	T	S	No	FIG01114299: hypothetical protein	6649	7917	1
7147	AAT	GAT	N	D	No	FIG01114299: hypothetical protein	6649	7917	1
7277	GCT	GGT	A	G	No	FIG01114299: hypothetical protein	6649	7917	1
7320	GCT	GCC	A	A	Yes	FIG01114299: hypothetical protein	6649	7917	1
7336	GCC	TCC	A	S	No	FIG01114299: hypothetical protein	6649	7917	1
7341	TAC	TAT	Y	Y	Yes	FIG01114299: hypothetical protein	6649	7917	1
7350	TAC	TAT	Y	Y	Yes	FIG01114299: hypothetical protein	6649	7917	1
7374	GGG	GGA	G	G	Yes	FIG01114299: hypothetical protein	6649	7917	1
7377	GAA	GAG	E	E	Yes	FIG01114299: hypothetical protein	6649	7917	1
7384	CTA	TTA	L	L	Yes	FIG01114299: hypothetical protein	6649	7917	1
7405	ATC	GTC	I	V	No	FIG01114299: hypothetical protein	6649	7917	1
7410	CCA	CCG	P	P	Yes	FIG01114299: hypothetical protein	6649	7917	1
7461	TTA	TTG	L	L	Yes	FIG01114299: hypothetical protein	6649	7917	1
7508	ACC	ATC	T	I	No	FIG01114299: hypothetical protein	6649	7917	1
7614	GGC	GGT	G	G	Yes	FIG01114299: hypothetical protein	6649	7917	1
7617	GAA	GAG	E	E	Yes	FIG01114299: hypothetical protein	6649	7917	1
7639	CTG	TTG	L	L	Yes	FIG01114299: hypothetical protein	6649	7917	1
7665	AAA	AAG	K	K	Yes	FIG01114299: hypothetical protein	6649	7917	1
7702	CTA	TTA	L	L	Yes	FIG01114299: hypothetical protein	6649	7917	1
7899	GTC	GTT	V	V	Yes	FIG01114299: hypothetical protein	6649	7917	1
7948	CGA	CAA	R	Q	No	tRNA(Ile)-lysidine synthetase	7914	9191	1
8024	CAG	CAT	Q	H	No	tRNA(Ile)-lysidine synthetase	7914	9191	1
8042	CAA	CAG	Q	Q	Yes	tRNA(Ile)-lysidine synthetase	7914	9191	1
8045	AAT	AAA	N	K	No	tRNA(Ile)-lysidine synthetase	7914	9191	1
8051	TTA	TTG	L	L	Yes	tRNA(Ile)-lysidine synthetase	7914	9191	1
8105	GAC	GAT	D	D	Yes	tRNA(Ile)-lysidine synthetase	7914	9191	1
8166	AGC	TGC	S	C	No	tRNA(Ile)-lysidine synthetase	7914	9191	1
8171	TTC	TTT	F	F	Yes	tRNA(Ile)-lysidine synthetase	7914	9191	1
8173	TTA	TCA	L	S	No	tRNA(Ile)-lysidine synthetase	7914	9191	1
8234	ATG	ATA	M	I	No	tRNA(Ile)-lysidine synthetase	7914	9191	1
8241	ATT	GTT	I	V	No	tRNA(Ile)-lysidine synthetase	7914	9191	1
8249	GCG	GCA	A	A	Yes	tRNA(Ile)-lysidine synthetase	7914	9191	1
8327	CTC	CTA	L	L	Yes	tRNA(Ile)-lysidine synthetase	7914	9191	1
8331	TAT	CAT	Y	H	No	tRNA(Ile)-lysidine synthetase	7914	9191	1
8354	AGA	AGT	R	S	No	tRNA(Ile)-lysidine synthetase	7914	9191	1
8379	ATT	CTC	I	L	No	tRNA(Ile)-lysidine synthetase	7914	9191	1
8381	T	C	Merged with SNP 8379
8395	CAT	CCT	H	P	No	tRNA(Ile)-lysidine synthetase	7914	9191	1
8411	GAT	GAC	D	D	Yes	tRNA(Ile)-lysidine synthetase	7914	9191	1
8480	CGA	CGG	R	R	Yes	tRNA(Ile)-lysidine synthetase	7914	9191	1
8490	TTA	ATA	L	I	No	tRNA(Ile)-lysidine synthetase	7914	9191	1
8518	CGT	CTT	R	L	No	tRNA(Ile)-lysidine synthetase	7914	9191	1
8582	GAG	GAA	E	E	Yes	tRNA(Ile)-lysidine synthetase	7914	9191	1
8619	CTA	TTC	L	F	No	tRNA(Ile)-lysidine synthetase	7914	9191	1
8621	A	C	Merged with SNP 8619
8633	TCT	TCA	S	S	Yes	tRNA(Ile)-lysidine synthetase	7914	9191	1
8634	CAA	AAA	Q	K	No	tRNA(Ile)-lysidine synthetase	7914	9191	1
8696	ACG	ACA	T	T	Yes	tRNA(Ile)-lysidine synthetase	7914	9191	1
8710	GAT	GCT	D	A	No	tRNA(Ile)-lysidine synthetase	7914	9191	1
8730	ACA	GCA	T	A	No	tRNA(Ile)-lysidine synthetase	7914	9191	1
8741	AGC	AGT	S	S	Yes	tRNA(Ile)-lysidine synthetase	7914	9191	1
8792	CAG	CAA	Q	Q	Yes	tRNA(Ile)-lysidine synthetase	7914	9191	1
8793	AAT	CGG	N	R	No	tRNA(Ile)-lysidine synthetase	7914	9191	1
8794	A	G	Merged with SNP 8793
8795	T	G	Merged with SNP 8793
8800	CGA	CAA	R	Q	No	tRNA(Ile)-lysidine synthetase	7914	9191	1
8802	GTT	ATT	V	I	No	tRNA(Ile)-lysidine synthetase	7914	9191	1
8878	AAG	ATG	K	M	No	tRNA(Ile)-lysidine synthetase	7914	9191	1
9064	ACA	ATA	T	I	No	tRNA(Ile)-lysidine synthetase	7914	9191	1
9375	ATC	ATT	I	I	Yes	Hypoxanthine-guanine phosphoribosyltransferase (EC 2.4.2.8)	9196	9738	1
9435	ATC	ATT	I	I	Yes	Hypoxanthine-guanine phosphoribosyltransferase (EC 2.4.2.8)	9196	9738	1
9460	GAT	AAT	D	N	No	Hypoxanthine-guanine phosphoribosyltransferase (EC 2.4.2.8)	9196	9738	1
9501	ATT	ATC	I	I	Yes	Hypoxanthine-guanine phosphoribosyltransferase (EC 2.4.2.8)	9196	9738	1
9507	ACG	ACA	T	T	Yes	Hypoxanthine-guanine phosphoribosyltransferase (EC 2.4.2.8)	9196	9738	1
9516	ACT	ACC	T	T	Yes	Hypoxanthine-guanine phosphoribosyltransferase (EC 2.4.2.8)	9196	9738	1
9524	AGT	AAT	S	N	No	Hypoxanthine-guanine phosphoribosyltransferase (EC 2.4.2.8)	9196	9738	1
9554	GTA	GCA	V	A	No	Hypoxanthine-guanine phosphoribosyltransferase (EC 2.4.2.8)	9196	9738	1
9556	GCT	ACT	A	T	No	Hypoxanthine-guanine phosphoribosyltransferase (EC 2.4.2.8)	9196	9738	1
9600	CGT	CGC	R	R	Yes	Hypoxanthine-guanine phosphoribosyltransferase (EC 2.4.2.8)	9196	9738	1
9624	TAC	TAT	Y	Y	Yes	Hypoxanthine-guanine phosphoribosyltransferase (EC 2.4.2.8)	9196	9738	1
9667	TTG	CTA	L	L	Yes	Hypoxanthine-guanine phosphoribosyltransferase (EC 2.4.2.8)	9196	9738	1
9669	G	A	Merged with SNP 9667
9672	GAC	GAT	D	D	Yes	Hypoxanthine-guanine phosphoribosyltransferase (EC 2.4.2.8)	9196	9738	1
9705	GTC	GTT	V	V	Yes	Hypoxanthine-guanine phosphoribosyltransferase (EC 2.4.2.8)	9196	9738	1
9786	AAT	AAC	N	N	Yes	Cell division protein FtsH (EC 3.4.24.-)	9754	11712	1
9795	CTA	CTC	L	L	Yes	Cell division protein FtsH (EC 3.4.24.-)	9754	11712	1
9867	AGC	AGT	S	S	Yes	Cell division protein FtsH (EC 3.4.24.-)	9754	11712	1
9933	TAT	TAC	Y	Y	Yes	Cell division protein FtsH (EC 3.4.24.-)	9754	11712	1
10002	ACG	ACT	T	T	Yes	Cell division protein FtsH (EC 3.4.24.-)	9754	11712	1
10026	ACA	ACT	T	T	Yes	Cell division protein FtsH (EC 3.4.24.-)	9754	11712	1
10055	ACT	AGT	T	S	No	Cell division protein FtsH (EC 3.4.24.-)	9754	11712	1
10056	ACT	ACC	T	T	Yes	Cell division protein FtsH (EC 3.4.24.-)	9754	11712	1
10077	ACA	ACC	T	T	Yes	Cell division protein FtsH (EC 3.4.24.-)	9754	11712	1
10204	TTA	CTA	L	L	Yes	Cell division protein FtsH (EC 3.4.24.-)	9754	11712	1
10275	GCC	GCT	A	A	Yes	Cell division protein FtsH (EC 3.4.24.-)	9754	11712	1
10284	GCT	GCA	A	A	Yes	Cell division protein FtsH (EC 3.4.24.-)	9754	11712	1
10308	CGA	CGT	R	R	Yes	Cell division protein FtsH (EC 3.4.24.-)	9754	11712	1
10311	TTT	TTC	F	F	Yes	Cell division protein FtsH (EC 3.4.24.-)	9754	11712	1
10314	TCA	TCG	S	S	Yes	Cell division protein FtsH (EC 3.4.24.-)	9754	11712	1
10323	GCA	GCT	A	A	Yes	Cell division protein FtsH (EC 3.4.24.-)	9754	11712	1
10353	GTT	GTA	V	V	Yes	Cell division protein FtsH (EC 3.4.24.-)	9754	11712	1
10368	TTC	TTT	F	F	Yes	Cell division protein FtsH (EC 3.4.24.-)	9754	11712	1
10392	ACC	ACA	T	T	Yes	Cell division protein FtsH (EC 3.4.24.-)	9754	11712	1
10416	GCG	GCA	A	A	Yes	Cell division protein FtsH (EC 3.4.24.-)	9754	11712	1
10470	GCG	GCA	A	A	Yes	Cell division protein FtsH (EC 3.4.24.-)	9754	11712	1
10479	GGA	GGG	G	G	Yes	Cell division protein FtsH (EC 3.4.24.-)	9754	11712	1
10488	GGA	GGT	G	G	Yes	Cell division protein FtsH (EC 3.4.24.-)	9754	11712	1
10503	AGC	AGT	S	S	Yes	Cell division protein FtsH (EC 3.4.24.-)	9754	11712	1
10512	GGA	GGT	G	G	Yes	Cell division protein FtsH (EC 3.4.24.-)	9754	11712	1
10515	TCG	TCT	S	S	Yes	Cell division protein FtsH (EC 3.4.24.-)	9754	11712	1
10545	GGG	GGT	G	G	Yes	Cell division protein FtsH (EC 3.4.24.-)	9754	11712	1
10548	GCT	GCA	A	A	Yes	Cell division protein FtsH (EC 3.4.24.-)	9754	11712	1
10554	CGA	CGT	R	R	Yes	Cell division protein FtsH (EC 3.4.24.-)	9754	11712	1
10563	TCA	TCC	S	S	Yes	Cell division protein FtsH (EC 3.4.24.-)	9754	11712	1
10728	GGA	GGG	G	G	Yes	Cell division protein FtsH (EC 3.4.24.-)	9754	11712	1
10731	ATT	ATC	I	I	Yes	Cell division protein FtsH (EC 3.4.24.-)	9754	11712	1
10860	CAC	CAT	H	H	Yes	Cell division protein FtsH (EC 3.4.24.-)	9754	11712	1
10890	GTG	GTT	V	V	Yes	Cell division protein FtsH (EC 3.4.24.-)	9754	11712	1
10917	ACT	ACC	T	T	Yes	Cell division protein FtsH (EC 3.4.24.-)	9754	11712	1
10941	TTG	TTA	L	L	Yes	Cell division protein FtsH (EC 3.4.24.-)	9754	11712	1
10989	AAG	AAA	K	K	Yes	Cell division protein FtsH (EC 3.4.24.-)	9754	11712	1
10993	GTC	ATC	V	I	No	Cell division protein FtsH (EC 3.4.24.-)	9754	11712	1
11025	GAA	GAG	E	E	Yes	Cell division protein FtsH (EC 3.4.24.-)	9754	11712	1
11055	AAG	AAA	K	K	Yes	Cell division protein FtsH (EC 3.4.24.-)	9754	11712	1
11079	GAA	GAG	E	E	Yes	Cell division protein FtsH (EC 3.4.24.-)	9754	11712	1
11082	CGG	CGT	R	R	Yes	Cell division protein FtsH (EC 3.4.24.-)	9754	11712	1
11115	ACT	ACC	T	T	Yes	Cell division protein FtsH (EC 3.4.24.-)	9754	11712	1
11130	GTC	GTA	V	V	Yes	Cell division protein FtsH (EC 3.4.24.-)	9754	11712	1
11131	TTG	CTG	L	L	Yes	Cell division protein FtsH (EC 3.4.24.-)	9754	11712	1
11187	GGT	GGC	G	G	Yes	Cell division protein FtsH (EC 3.4.24.-)	9754	11712	1
11190	GGT	GGA	G	G	Yes	Cell division protein FtsH (EC 3.4.24.-)	9754	11712	1
11202	GCG	GCA	A	A	Yes	Cell division protein FtsH (EC 3.4.24.-)	9754	11712	1
11208	CCG	CCT	P	P	Yes	Cell division protein FtsH (EC 3.4.24.-)	9754	11712	1
11214	GAG	GAA	E	E	Yes	Cell division protein FtsH (EC 3.4.24.-)	9754	11712	1
11304	GTC	GTT	V	V	Yes	Cell division protein FtsH (EC 3.4.24.-)	9754	11712	1
11310	ACG	ACT	T	T	Yes	Cell division protein FtsH (EC 3.4.24.-)	9754	11712	1
11523	GCA	GCT	A	A	Yes	Cell division protein FtsH (EC 3.4.24.-)	9754	11712	1
11532	ATC	ATT	I	I	Yes	Cell division protein FtsH (EC 3.4.24.-)	9754	11712	1
11535	ATT	ATC	I	I	Yes	Cell division protein FtsH (EC 3.4.24.-)	9754	11712	1
11538	CAG	CAA	Q	Q	Yes	Cell division protein FtsH (EC 3.4.24.-)	9754	11712	1
11553	ACT	ACG	T	T	Yes	Cell division protein FtsH (EC 3.4.24.-)	9754	11712	1
11574	GCA	GCG	A	A	Yes	Cell division protein FtsH (EC 3.4.24.-)	9754	11712	1
11586	TAC	TAT	Y	Y	Yes	Cell division protein FtsH (EC 3.4.24.-)	9754	11712	1
11625	GAA	GAG	E	E	Yes	Cell division protein FtsH (EC 3.4.24.-)	9754	11712	1
11668	CTA	TTA	L	L	Yes	Cell division protein FtsH (EC 3.4.24.-)	9754	11712	1
11677	AAT	GAT	N	D	No	Cell division protein FtsH (EC 3.4.24.-)	9754	11712	1
11772	T	C				Intergenic region
11780	T	C				Intergenic region
11834	C	T				Intergenic region
11879	A	G				Intergenic region
11882	G	A				Intergenic region
11933	G	A				Intergenic region
11978	A	G				Intergenic region
12028	CAG	CAA	Q	Q	Yes	Response regulator of the competence regulon ComE	12020	12562	1
12055	GCT	GCC	A	A	Yes	Response regulator of the competence regulon ComE	12020	12562	1
12058	ATT	ATG	I	M	No	Response regulator of the competence regulon ComE	12020	12562	1
12124	CTA	CTT	L	L	Yes	Response regulator of the competence regulon ComE	12020	12562	1
12161	AAA	TAA	K	*	No	Response regulator of the competence regulon ComE	12020	12562	1
12178	CAG	CAA	Q	Q	Yes	Response regulator of the competence regulon ComE	12020	12562	1
12193	ACT	ACC	T	T	Yes	Response regulator of the competence regulon ComE	12020	12562	1
12196	AAG	AAT	K	N	No	Response regulator of the competence regulon ComE	12020	12562	1
12214	AAC	AAC	N	N	Yes	Response regulator of the competence regulon ComE	12020	12562	1
12307	GTT	GTC	V	V	Yes	Response regulator of the competence regulon ComE	12020	12562	1
12326	ATT	TTT	I	F	No	Response regulator of the competence regulon ComE	12020	12562	1
12344	AAA	GAA	K	E	No	Response regulator of the competence regulon ComE	12020	12562	1
12590	G	A				Intergenic region
12596	T	C				Intergenic region
12608	A	C				Intergenic region
12611	A	G				Intergenic region
12632	A	G				Intergenic region
12860	T	C				Intergenic region
12911	G	A				Intergenic region
12941	G	A				Intergenic region
12968	A	G				Intergenic region
12974	A	G				Intergenic region
12977	A	T				Intergenic region
12989	G	A				Intergenic region
13010	C	A				Intergenic region
13037	A	G				Intergenic region
15033	T	C				Intergenic region
15133	T	A				Intergenic region
15592	A	C				Intergenic region
16212	G	T				Intergenic region
16460	A	G				Intergenic region
17919	G	A				Intergenic region
17922	T	C				Intergenic region
17934	T	C				Intergenic region
17938	G	A				Intergenic region
17966	T	C				Intergenic region
18023	C	T				Intergenic region
18077	T	C				Intergenic region
18126	A	C				Intergenic region
18131	A	G				Intergenic region
18184	C	T				Intergenic region
18348	C	A				Intergenic region
18431	A	C				Intergenic region
18456	G	A				Intergenic region
18576	CTG	CTC	L	L	Yes	Adenylosuccinate synthetase (EC 6.3.4.4)	18553	19887	1
18630	CAG	CAA	Q	Q	Yes	Adenylosuccinate synthetase (EC 6.3.4.4)	18553	19887	1
18636	GGT	GGC	G	G	Yes	Adenylosuccinate synthetase (EC 6.3.4.4)	18553	19887	1
19362	GGT	GGC	G	G	Yes	Adenylosuccinate synthetase (EC 6.3.4.4)	18553	19887	1
19392	GTC	GTT	V	V	Yes	Adenylosuccinate synthetase (EC 6.3.4.4)	18553	19887	1
19404	TAC	TAT	Y	Y	Yes	Adenylosuccinate synthetase (EC 6.3.4.4)	18553	19887	1
19470	CGC	CGT	R	R	Yes	Adenylosuccinate synthetase (EC 6.3.4.4)	18553	19887	1
19488	TAT	TAC	Y	Y	Yes	Adenylosuccinate synthetase (EC 6.3.4.4)	18553	19887	1
19518	GTG	GTA	V	V	Yes	Adenylosuccinate synthetase (EC 6.3.4.4)	18553	19887	1
19545	CGC	CGT	R	R	Yes	Adenylosuccinate synthetase (EC 6.3.4.4)	18553	19887	1
19552	CGC	TGC	R	C	No	Adenylosuccinate synthetase (EC 6.3.4.4)	18553	19887	1
19593	ATA	ATC	I	I	Yes	Adenylosuccinate synthetase (EC 6.3.4.4)	18553	19887	1
19632	GTC	GTG	V	V	Yes	Adenylosuccinate synthetase (EC 6.3.4.4)	18553	19887	1
19758	TTG	TTA	L	L	Yes	Adenylosuccinate synthetase (EC 6.3.4.4)	18553	19887	1
19803	AGT	AGC	S	S	Yes	Adenylosuccinate synthetase (EC 6.3.4.4)	18553	19887	1
19821	CGC	CGT	R	R	Yes	Adenylosuccinate synthetase (EC 6.3.4.4)	18553	19887	1
19824	ATT	ATC	I	I	Yes	Adenylosuccinate synthetase (EC 6.3.4.4)	18553	19887	1
19827	TCG	TCA	S	S	Yes	Adenylosuccinate synthetase (EC 6.3.4.4)	18553	19887	1
19830	ACA	ACT	T	T	Yes	Adenylosuccinate synthetase (EC 6.3.4.4)	18553	19887	1
19845	CCT	CCC	P	P	Yes	Adenylosuccinate synthetase (EC 6.3.4.4)	18553	19887	1
20117	GCT	GCC	A	A	Yes	tRNA-specific adenosine-34 deaminase (EC 3.5.4.-)	20088	20555	1
20153	GCT	GCC	A	A	Yes	tRNA-specific adenosine-34 deaminase (EC 3.5.4.-)	20088	20555	1
20159	GAG	GAA	E	E	Yes	tRNA-specific adenosine-34 deaminase (EC 3.5.4.-)	20088	20555	1
20219	GGA	GGG	G	G	Yes	tRNA-specific adenosine-34 deaminase (EC 3.5.4.-)	20088	20555	1
20289	CTG	GTG	L	V	No	tRNA-specific adenosine-34 deaminase (EC 3.5.4.-)	20088	20555	1
20309	CGT	CGC	R	R	Yes	tRNA-specific adenosine-34 deaminase (EC 3.5.4.-)	20088	20555	1
20315	CTG	CTC	L	L	Yes	tRNA-specific adenosine-34 deaminase (EC 3.5.4.-)	20088	20555	1
20324	ACC	ACG	T	T	Yes	tRNA-specific adenosine-34 deaminase (EC 3.5.4.-)	20088	20555	1
20393	GTG	GTA	V	V	Yes	tRNA-specific adenosine-34 deaminase (EC 3.5.4.-)	20088	20555	1
20399	TAT	TAC	Y	Y	Yes	tRNA-specific adenosine-34 deaminase (EC 3.5.4.-)	20088	20555	1
20408	AAA	AAG	K	K	Yes	tRNA-specific adenosine-34 deaminase (EC 3.5.4.-)	20088	20555	1
20435	AGT	AGC	S	S	Yes	tRNA-specific adenosine-34 deaminase (EC 3.5.4.-)	20088	20555	1
20483	GTG	GTA	V	V	Yes	tRNA-specific adenosine-34 deaminase (EC 3.5.4.-)	20088	20555	1
20570	T	C				Intergenic region
20591	A	G				Intergenic region
20593	C	A				Intergenic region
21253	GCA	GCC	A	A	Yes	hypothetical protein	21194	21661	1
21526	GTC	GTT	V	V	Yes	hypothetical protein	21194	21661	1
22170	TCC	TCT	S	S	Yes	DNA repair protein RadA	21796	23019	1
22200	TCT	TCA	S	S	Yes	DNA repair protein RadA	21796	23019	1
22203	GGA	GGG	G	G	Yes	DNA repair protein RadA	21796	23019	1
22209	CAA	CAG	Q	Q	Yes	DNA repair protein RadA	21796	23019	1
22215	TCA	TCT	S	S	Yes	DNA repair protein RadA	21796	23019	1
22255	CTG	TTA	L	L	Yes	DNA repair protein RadA	21796	23019	1
22257	G	A	Merged with SNP 22255
22260	GCC	GCG	A	A	Yes	DNA repair protein RadA	21796	23019	1
22278	GCT	GCC	A	A	Yes	DNA repair protein RadA	21796	23019	1
22320	GCT	GCG	A	A	Yes	DNA repair protein RadA	21796	23019	1
22353	ACG	ACA	T	T	Yes	DNA repair protein RadA	21796	23019	1
22377	CGC	CGT	R	R	Yes	DNA repair protein RadA	21796	23019	1
22389	TTC	TTT	F	F	Yes	DNA repair protein RadA	21796	23019	1
22422	GGA	GGT	G	G	Yes	DNA repair protein RadA	21796	23019	1
22476	GTA	GTG	V	V	Yes	DNA repair protein RadA	21796	23019	1
22554	GGG	GGA	G	G	Yes	DNA repair protein RadA	21796	23019	1
22587	TTG	TTA	L	L	Yes	DNA repair protein RadA	21796	23019	1
22590	GTA	GTG	V	V	Yes	DNA repair protein RadA	21796	23019	1
22599	ACC	ACT	T	T	Yes	DNA repair protein RadA	21796	23019	1
22620	CGT	CGC	R	R	Yes	DNA repair protein RadA	21796	23019	1
22623	ACG	ACA	T	T	Yes	DNA repair protein RadA	21796	23019	1
22629	ACT	ACA	T	T	Yes	DNA repair protein RadA	21796	23019	1
22632	GGA	GGT	G	G	Yes	DNA repair protein RadA	21796	23019	1
22692	CTC	CTT	L	L	Yes	DNA repair protein RadA	21796	23019	1
22731	GGC	GGT	G	G	Yes	DNA repair protein RadA	21796	23019	1
22752	GCT	GCC	A	A	Yes	DNA repair protein RadA	21796	23019	1
22869	CGT	CGC	R	R	Yes	DNA repair protein RadA	21796	23019	1
22884	ATC	ATT	I	I	Yes	DNA repair protein RadA	21796	23019	1
22983	ACG	ACA	T	T	Yes	DNA repair protein RadA	21796	23019	1
22986	ACT	ACG	T	T	Yes	DNA repair protein RadA	21796	23019	1
22992	CAG	CAA	Q	Q	Yes	DNA repair protein RadA	21796	23019	1
23033	T	C				Intergenic region
23069	G	A				Intergenic region
23310	GTA	GTG	V	V	Yes	Carbonic anhydrase (EC 4.2.1.1)	23092	23586	1
23319	CAG	CAA	Q	Q	Yes	Carbonic anhydrase (EC 4.2.1.1)	23092	23586	1
23325	CAA	CAG	Q	Q	Yes	Carbonic anhydrase (EC 4.2.1.1)	23092	23586	1
23331	GGG	GGA	G	G	Yes	Carbonic anhydrase (EC 4.2.1.1)	23092	23586	1
23383	CAA	AAA	Q	K	No	Carbonic anhydrase (EC 4.2.1.1)	23092	23586	1
23475	AGT	AGC	S	S	Yes	Carbonic anhydrase (EC 4.2.1.1)	23092	23586	1
23657	G	A				Intergenic region
23696	G	A				Intergenic region
23822	CTA	CTG	L	L	Yes	Ribose-phosphate pyrophosphokinase (EC 2.7.6.1)	23799	24767	1
23855	GAG	GAA	E	E	Yes	Ribose-phosphate pyrophosphokinase (EC 2.7.6.1)	23799	24767	1
23918	GGA	GGG	G	G	Yes	Ribose-phosphate pyrophosphokinase (EC 2.7.6.1)	23799	24767	1
25875	CTT	CTC	L	L	Yes	Putative membrane protein YeiH	25353	26363	-1
25881	GCA	GCG	A	A	Yes	Putative membrane protein YeiH	25353	26363	-1
25911	ATC	ATT	I	I	Yes	Putative membrane protein YeiH	25353	26363	-1
25923	GTC	GTT	V	V	Yes	Putative membrane protein YeiH	25353	26363	-1
25986	TCT	TCG	S	S	Yes	Putative membrane protein YeiH	25353	26363	-1
25992	GGT	GGA	G	G	Yes	Putative membrane protein YeiH	25353	26363	-1
26019	ACG	ATA	T	I	No	Putative membrane protein YeiH	25353	26363	-1
26020	G	A	Merged with SNP 26019
26102	ACT	TCT	T	S	No	Putative membrane protein YeiH	25353	26363	-1
26115	TTT	TTC	F	F	Yes	Putative membrane protein YeiH	25353	26363	-1
26189	GCC	ACC	A	T	No	Putative membrane protein YeiH	25353	26363	-1
26295	TTT	TTC	F	F	Yes	Putative membrane protein YeiH	25353	26363	-1
26334	GGC	GGA	G	G	Yes	Putative membrane protein YeiH	25353	26363	-1
26404	T	C				Intergenic region
26441	G	T				Intergenic region
26465	G	A				Intergenic region
26529	AAG	AAA	K	K	Yes	Aromatic amino acid aminotransferase gamma (EC 2.6.1.57) @ N-acetyl-L,L-diaminopimelate aminotransferase (EC 2.6.1.-)	26515	27684	1
26589	GCT	GCA	A	A	Yes	Aromatic amino acid aminotransferase gamma (EC 2.6.1.57) @ N-acetyl-L,L-diaminopimelate aminotransferase (EC 2.6.1.-)	26515	27684	1
26595	TCG	TCA	S	S	Yes	Aromatic amino acid aminotransferase gamma (EC 2.6.1.57) @ N-acetyl-L,L-diaminopimelate aminotransferase (EC 2.6.1.-)	26515	27684	1
26656	ATC	GTC	I	V	No	Aromatic amino acid aminotransferase gamma (EC 2.6.1.57) @ N-acetyl-L,L-diaminopimelate aminotransferase (EC 2.6.1.-)	26515	27684	1
26666	GTA	GCA	V	A	No	Aromatic amino acid aminotransferase gamma (EC 2.6.1.57) @ N-acetyl-L,L-diaminopimelate aminotransferase (EC 2.6.1.-)	26515	27684	1
26667	GTA	GTG	V	V	Yes	Aromatic amino acid aminotransferase gamma (EC 2.6.1.57) @ N-acetyl-L,L-diaminopimelate aminotransferase (EC 2.6.1.-)	26515	27684	1
26670	GCC	GCA	A	A	Yes	Aromatic amino acid aminotransferase gamma (EC 2.6.1.57) @ N-acetyl-L,L-diaminopimelate aminotransferase (EC 2.6.1.-)	26515	27684	1
26676	CGA	CGG	R	R	Yes	Aromatic amino acid aminotransferase gamma (EC 2.6.1.57) @ N-acetyl-L,L-diaminopimelate aminotransferase (EC 2.6.1.-)	26515	27684	1
26814	GCG	GCA	A	A	Yes	Aromatic amino acid aminotransferase gamma (EC 2.6.1.57) @ N-acetyl-L,L-diaminopimelate aminotransferase (EC 2.6.1.-)	26515	27684	1
26859	GGA	GGG	G	G	Yes	Aromatic amino acid aminotransferase gamma (EC 2.6.1.57) @ N-acetyl-L,L-diaminopimelate aminotransferase (EC 2.6.1.-)	26515	27684	1
26886	GCC	GCT	A	A	Yes	Aromatic amino acid aminotransferase gamma (EC 2.6.1.57) @ N-acetyl-L,L-diaminopimelate aminotransferase (EC 2.6.1.-)	26515	27684	1
26895	GGT	GGC	G	G	Yes	Aromatic amino acid aminotransferase gamma (EC 2.6.1.57) @ N-acetyl-L,L-diaminopimelate aminotransferase (EC 2.6.1.-)	26515	27684	1
26964	GTT	GTC	V	V	Yes	Aromatic amino acid aminotransferase gamma (EC 2.6.1.57) @ N-acetyl-L,L-diaminopimelate aminotransferase (EC 2.6.1.-)	26515	27684	1
26970	ACC	ACT	T	T	Yes	Aromatic amino acid aminotransferase gamma (EC 2.6.1.57) @ N-acetyl-L,L-diaminopimelate aminotransferase (EC 2.6.1.-)	26515	27684	1
27003	CAG	CAA	Q	Q	Yes	Aromatic amino acid aminotransferase gamma (EC 2.6.1.57) @ N-acetyl-L,L-diaminopimelate aminotransferase (EC 2.6.1.-)	26515	27684	1
27006	GGT	GGG	G	G	Yes	Aromatic amino acid aminotransferase gamma (EC 2.6.1.57) @ N-acetyl-L,L-diaminopimelate aminotransferase (EC 2.6.1.-)	26515	27684	1
27048	CCA	CCG	P	P	Yes	Aromatic amino acid aminotransferase gamma (EC 2.6.1.57) @ N-acetyl-L,L-diaminopimelate aminotransferase (EC 2.6.1.-)	26515	27684	1
27051	ACT	ACA	T	T	Yes	Aromatic amino acid aminotransferase gamma (EC 2.6.1.57) @ N-acetyl-L,L-diaminopimelate aminotransferase (EC 2.6.1.-)	26515	27684	1
27069	CGA	CGG	R	R	Yes	Aromatic amino acid aminotransferase gamma (EC 2.6.1.57) @ N-acetyl-L,L-diaminopimelate aminotransferase (EC 2.6.1.-)	26515	27684	1
27405	ATC	ATT	I	I	Yes	Aromatic amino acid aminotransferase gamma (EC 2.6.1.57) @ N-acetyl-L,L-diaminopimelate aminotransferase (EC 2.6.1.-)	26515	27684	1
27468	GAT	GAC	D	D	Yes	Aromatic amino acid aminotransferase gamma (EC 2.6.1.57) @ N-acetyl-L,L-diaminopimelate aminotransferase (EC 2.6.1.-)	26515	27684	1
27474	GCC	GCT	A	A	Yes	Aromatic amino acid aminotransferase gamma (EC 2.6.1.57) @ N-acetyl-L,L-diaminopimelate aminotransferase (EC 2.6.1.-)	26515	27684	1
27477	TTC	TTT	F	F	Yes	Aromatic amino acid aminotransferase gamma (EC 2.6.1.57) @ N-acetyl-L,L-diaminopimelate aminotransferase (EC 2.6.1.-)	26515	27684	1
27531	CTC	CTG	L	L	Yes	Aromatic amino acid aminotransferase gamma (EC 2.6.1.57) @ N-acetyl-L,L-diaminopimelate aminotransferase (EC 2.6.1.-)	26515	27684	1
27576	GCT	GCA	A	A	Yes	Aromatic amino acid aminotransferase gamma (EC 2.6.1.57) @ N-acetyl-L,L-diaminopimelate aminotransferase (EC 2.6.1.-)	26515	27684	1
27875	GAC	GAT	D	D	Yes	DNA recombination and repair protein RecO	27681	28451	1
27878	GGC	GGG	G	G	Yes	DNA recombination and repair protein RecO	27681	28451	1
28022	GCC	GCT	A	A	Yes	DNA recombination and repair protein RecO	27681	28451	1
28105	AAC	ACC	N	T	No	DNA recombination and repair protein RecO	27681	28451	1
28106	AAC	AAT	N	N	Yes	DNA recombination and repair protein RecO	27681	28451	1
28292	GAG	GAA	E	E	Yes	DNA recombination and repair protein RecO	27681	28451	1
28341	CAA	AAG	Q	K	No	DNA recombination and repair protein RecO	27681	28451	1
28343	A	G	Merged with SNP 28341
28385	CTT	CTA	L	L	Yes	DNA recombination and repair protein RecO	27681	28451	1
28403	ATT	ATC	I	I	Yes	DNA recombination and repair protein RecO	27681	28451	1
28443	AAC	GAC	N	D	No	DNA recombination and repair protein RecO	27681	28451	1
28459	ATT	ATC	I	I	Yes	Phosphate:acyl-ACP acyltransferase PlsX	28448	29440	1
28531	GAT	GAC	D	D	Yes	Phosphate:acyl-ACP acyltransferase PlsX	28448	29440	1
28552	CAA	CAG	Q	Q	Yes	Phosphate:acyl-ACP acyltransferase PlsX	28448	29440	1
28594	GCG	GCT	A	A	Yes	Phosphate:acyl-ACP acyltransferase PlsX	28448	29440	1
28693	TTA	TTG	L	L	Yes	Phosphate:acyl-ACP acyltransferase PlsX	28448	29440	1
28696	GCG	GCA	A	A	Yes	Phosphate:acyl-ACP acyltransferase PlsX	28448	29440	1
28699	GCC	GCT	A	A	Yes	Phosphate:acyl-ACP acyltransferase PlsX	28448	29440	1
28705	GCA	GCT	A	A	Yes	Phosphate:acyl-ACP acyltransferase PlsX	28448	29440	1
28708	GTC	GTT	V	V	Yes	Phosphate:acyl-ACP acyltransferase PlsX	28448	29440	1
28726	GAT	GAC	D	D	Yes	Phosphate:acyl-ACP acyltransferase PlsX	28448	29440	1
28780	ATC	ATT	I	I	Yes	Phosphate:acyl-ACP acyltransferase PlsX	28448	29440	1
28822	TCG	TCT	S	S	Yes	Phosphate:acyl-ACP acyltransferase PlsX	28448	29440	1
28837	ATC	ATT	I	I	Yes	Phosphate:acyl-ACP acyltransferase PlsX	28448	29440	1
28849	GGG	GGC	G	G	Yes	Phosphate:acyl-ACP acyltransferase PlsX	28448	29440	1
28870	GGG	GGA	G	G	Yes	Phosphate:acyl-ACP acyltransferase PlsX	28448	29440	1
28879	GCA	GCG	A	A	Yes	Phosphate:acyl-ACP acyltransferase PlsX	28448	29440	1
28949	ATT	GTT	I	V	No	Phosphate:acyl-ACP acyltransferase PlsX	28448	29440	1
29033	TTA	CTA	L	L	Yes	Phosphate:acyl-ACP acyltransferase PlsX	28448	29440	1
29045	GAA	CAA	E	Q	No	Phosphate:acyl-ACP acyltransferase PlsX	28448	29440	1
29149	TCT	TCC	S	S	Yes	Phosphate:acyl-ACP acyltransferase PlsX	28448	29440	1
29152	ATC	ATT	I	I	Yes	Phosphate:acyl-ACP acyltransferase PlsX	28448	29440	1
29158	GGT	GGG	G	G	Yes	Phosphate:acyl-ACP acyltransferase PlsX	28448	29440	1
29164	GCT	GCC	A	A	Yes	Phosphate:acyl-ACP acyltransferase PlsX	28448	29440	1
29165	TTG	ATG	L	M	No	Phosphate:acyl-ACP acyltransferase PlsX	28448	29440	1
29200	ACG	ACA	T	T	Yes	Phosphate:acyl-ACP acyltransferase PlsX	28448	29440	1
29209	GGC	GGT	G	G	Yes	Phosphate:acyl-ACP acyltransferase PlsX	28448	29440	1
29353	AAT	AAG	N	K	No	Phosphate:acyl-ACP acyltransferase PlsX	28448	29440	1
29413	CAG	CAA	Q	Q	Yes	Phosphate:acyl-ACP acyltransferase PlsX	28448	29440	1
29494	AGA	CGA	R	R	Yes	Acyl carrier protein	29446	29682	1
29526	GCT	GCC	A	A	Yes	Acyl carrier protein	29446	29682	1
29565	GAT	GAC	D	D	Yes	Acyl carrier protein	29446	29682	1
29580	GTT	GTC	V	V	Yes	Acyl carrier protein	29446	29682	1
29631	GAC	GAT	D	D	Yes	Acyl carrier protein	29446	29682	1
29735	C	T				Intergenic region
29783	C	T				Intergenic region
29784	A	G				Intergenic region
29799	T	C				Intergenic region
29904	C	T				Intergenic region
29907	T	C				Intergenic region
29909	T	C				Intergenic region
30687	GGA	GGG	G	G	Yes	hypothetical protein	30505	30693	1
30696	A	G				Intergenic region
30707	C	T				Intergenic region
31199	TCT	TCC	S	S	Yes	Competence-stimulating peptide ABC transporter ATP-binding protein ComA	31137	33290	1
31217	GGT	GGC	G	G	Yes	Competence-stimulating peptide ABC transporter ATP-binding protein ComA	31137	33290	1
31259	TTA	TTG	L	L	Yes	Competence-stimulating peptide ABC transporter ATP-binding protein ComA	31137	33290	1
31416	TTG	CTG	L	L	Yes	Competence-stimulating peptide ABC transporter ATP-binding protein ComA	31137	33290	1
31438	ATA	ACA	I	T	No	Competence-stimulating peptide ABC transporter ATP-binding protein ComA	31137	33290	1
31775	GTC	GTT	V	V	Yes	Competence-stimulating peptide ABC transporter ATP-binding protein ComA	31137	33290	1
31787	ATT	ATC	I	I	Yes	Competence-stimulating peptide ABC transporter ATP-binding protein ComA	31137	33290	1
31853	ATC	ATT	I	I	Yes	Competence-stimulating peptide ABC transporter ATP-binding protein ComA	31137	33290	1
31889	CAC	CAT	H	H	Yes	Competence-stimulating peptide ABC transporter ATP-binding protein ComA	31137	33290	1
31934	GTT	GTA	V	V	Yes	Competence-stimulating peptide ABC transporter ATP-binding protein ComA	31137	33290	1
31971	CTG	TTG	L	L	Yes	Competence-stimulating peptide ABC transporter ATP-binding protein ComA	31137	33290	1
32732	AAT	AAC	N	N	Yes	Competence-stimulating peptide ABC transporter ATP-binding protein ComA	31137	33290	1
32735	TTT	TTC	F	F	Yes	Competence-stimulating peptide ABC transporter ATP-binding protein ComA	31137	33290	1
32741	GAC	GAT	D	D	Yes	Competence-stimulating peptide ABC transporter ATP-binding protein ComA	31137	33290	1
32750	CAA	CAG	Q	Q	Yes	Competence-stimulating peptide ABC transporter ATP-binding protein ComA	31137	33290	1
32753	GGG	GGA	G	G	Yes	Competence-stimulating peptide ABC transporter ATP-binding protein ComA	31137	33290	1
32792	GAT	GAC	D	D	Yes	Competence-stimulating peptide ABC transporter ATP-binding protein ComA	31137	33290	1
32802	CTG	TTG	L	L	Yes	Competence-stimulating peptide ABC transporter ATP-binding protein ComA	31137	33290	1
32825	CTG	CTA	L	L	Yes	Competence-stimulating peptide ABC transporter ATP-binding protein ComA	31137	33290	1
33011	GGA	GGG	G	G	Yes	Competence-stimulating peptide ABC transporter ATP-binding protein ComA	31137	33290	1
33218	AAG	AAA	K	K	Yes	Competence-stimulating peptide ABC transporter ATP-binding protein ComA	31137	33290	1
33233	GGC	GGT	G	G	Yes	Competence-stimulating peptide ABC transporter ATP-binding protein ComA	31137	33290	1
33350	TAC	TAT	Y	Y	Yes	Competence-stimulating peptide ABC transporter permease protein ComB	33303	34652	1
33393	CTC	TTC	L	F	No	Competence-stimulating peptide ABC transporter permease protein ComB	33303	34652	1
33396	ATG	GTG	M	V	No	Competence-stimulating peptide ABC transporter permease protein ComB	33303	34652	1
33437	ATT	ATG	I	M	No	Competence-stimulating peptide ABC transporter permease protein ComB	33303	34652	1
33549	CAA	AAA	Q	K	No	Competence-stimulating peptide ABC transporter permease protein ComB	33303	34652	1
33581	GGA	GGG	G	G	Yes	Competence-stimulating peptide ABC transporter permease protein ComB	33303	34652	1
33591	ATC	GTC	I	V	No	Competence-stimulating peptide ABC transporter permease protein ComB	33303	34652	1
33611	GCT	GCC	A	A	Yes	Competence-stimulating peptide ABC transporter permease protein ComB	33303	34652	1
33716	TAC	TAT	Y	Y	Yes	Competence-stimulating peptide ABC transporter permease protein ComB	33303	34652	1
33719	CAA	CAG	Q	Q	Yes	Competence-stimulating peptide ABC transporter permease protein ComB	33303	34652	1
33764	AGC	AGT	S	S	Yes	Competence-stimulating peptide ABC transporter permease protein ComB	33303	34652	1
33773	TCG	TCT	S	S	Yes	Competence-stimulating peptide ABC transporter permease protein ComB	33303	34652	1
33787	AAC	AGC	N	S	No	Competence-stimulating peptide ABC transporter permease protein ComB	33303	34652	1
33845	ATC	ATT	I	I	Yes	Competence-stimulating peptide ABC transporter permease protein ComB	33303	34652	1
33848	AGC	AGT	S	S	Yes	Competence-stimulating peptide ABC transporter permease protein ComB	33303	34652	1
33860	GAA	GAT	E	D	No	Competence-stimulating peptide ABC transporter permease protein ComB	33303	34652	1
33959	AAT	AAC	N	N	Yes	Competence-stimulating peptide ABC transporter permease protein ComB	33303	34652	1
33980	CAC	CAA	H	Q	No	Competence-stimulating peptide ABC transporter permease protein ComB	33303	34652	1
34019	ATC	ATT	I	I	Yes	Competence-stimulating peptide ABC transporter permease protein ComB	33303	34652	1
34020	ACC	GCC	T	A	No	Competence-stimulating peptide ABC transporter permease protein ComB	33303	34652	1
34038	TTA	CTA	L	L	Yes	Competence-stimulating peptide ABC transporter permease protein ComB	33303	34652	1
34055	GTG	GTA	V	V	Yes	Competence-stimulating peptide ABC transporter permease protein ComB	33303	34652	1
34079	CAG	CAA	Q	Q	Yes	Competence-stimulating peptide ABC transporter permease protein ComB	33303	34652	1
34145	GTT	GTC	V	V	Yes	Competence-stimulating peptide ABC transporter permease protein ComB	33303	34652	1
34280	AGT	AGC	S	S	Yes	Competence-stimulating peptide ABC transporter permease protein ComB	33303	34652	1
34283	GAA	GAT	E	D	No	Competence-stimulating peptide ABC transporter permease protein ComB	33303	34652	1
34346	GGG	GGC	G	G	Yes	Competence-stimulating peptide ABC transporter permease protein ComB	33303	34652	1
34352	ACC	ACT	T	T	Yes	Competence-stimulating peptide ABC transporter permease protein ComB	33303	34652	1
34361	ACA	ACG	T	T	Yes	Competence-stimulating peptide ABC transporter permease protein ComB	33303	34652	1
34412	GTT	GTC	V	V	Yes	Competence-stimulating peptide ABC transporter permease protein ComB	33303	34652	1
34460	TCT	TCC	S	S	Yes	Competence-stimulating peptide ABC transporter permease protein ComB	33303	34652	1
34555	GAA	GCA	E	A	No	Competence-stimulating peptide ABC transporter permease protein ComB	33303	34652	1
34558	AAA	ACA	K	T	No	Competence-stimulating peptide ABC transporter permease protein ComB	33303	34652	1
34565	CGC	CGT	R	R	Yes	Competence-stimulating peptide ABC transporter permease protein ComB	33303	34652	1
34595	ATT	ATC	I	I	Yes	Competence-stimulating peptide ABC transporter permease protein ComB	33303	34652	1
34598	ACG	ACA	T	T	Yes	Competence-stimulating peptide ABC transporter permease protein ComB	33303	34652	1
34601	GGA	GGG	G	G	Yes	Competence-stimulating peptide ABC transporter permease protein ComB	33303	34652	1
34673	T	A				Intergenic region
34684	T	A				Intergenic region
34700	C	T				Intergenic region
34702	T	C				Intergenic region
34739	C	T				Intergenic region
34770	T	C				Intergenic region
34920	GCC	GCT	A	A	Yes	Phosphoribosylaminoimidazole-succinocarboxamide synthase (EC 6.3.2.6)	34822	35529	1
34923	TTC	TTT	F	F	Yes	Phosphoribosylaminoimidazole-succinocarboxamide synthase (EC 6.3.2.6)	34822	35529	1
35025	CAC	CAT	H	H	Yes	Phosphoribosylaminoimidazole-succinocarboxamide synthase (EC 6.3.2.6)	34822	35529	1
35035	GAA	AAG	E	K	No	Phosphoribosylaminoimidazole-succinocarboxamide synthase (EC 6.3.2.6)	34822	35529	1
35037	A	G	Merged with SNP 35035
35038	ATT	CTT	I	L	No	Phosphoribosylaminoimidazole-succinocarboxamide synthase (EC 6.3.2.6)	34822	35529	1
35055	CAA	CAG	Q	Q	Yes	Phosphoribosylaminoimidazole-succinocarboxamide synthase (EC 6.3.2.6)	34822	35529	1
35070	GTG	GTT	V	V	Yes	Phosphoribosylaminoimidazole-succinocarboxamide synthase (EC 6.3.2.6)	34822	35529	1
35109	ACG	ACA	T	T	Yes	Phosphoribosylaminoimidazole-succinocarboxamide synthase (EC 6.3.2.6)	34822	35529	1
35220	GAT	GAC	D	D	Yes	Phosphoribosylaminoimidazole-succinocarboxamide synthase (EC 6.3.2.6)	34822	35529	1
35238	CTA	CTT	L	L	Yes	Phosphoribosylaminoimidazole-succinocarboxamide synthase (EC 6.3.2.6)	34822	35529	1
35253	GAT	GAC	D	D	Yes	Phosphoribosylaminoimidazole-succinocarboxamide synthase (EC 6.3.2.6)	34822	35529	1
35298	GAA	GAG	E	E	Yes	Phosphoribosylaminoimidazole-succinocarboxamide synthase (EC 6.3.2.6)	34822	35529	1
35301	CTT	CTC	L	L	Yes	Phosphoribosylaminoimidazole-succinocarboxamide synthase (EC 6.3.2.6)	34822	35529	1
35307	AAG	AAA	K	K	Yes	Phosphoribosylaminoimidazole-succinocarboxamide synthase (EC 6.3.2.6)	34822	35529	1
35328	GGT	GGC	G	G	Yes	Phosphoribosylaminoimidazole-succinocarboxamide synthase (EC 6.3.2.6)	34822	35529	1
35350	CTA	TTA	L	L	Yes	Phosphoribosylaminoimidazole-succinocarboxamide synthase (EC 6.3.2.6)	34822	35529	1
35358	TTC	TTT	F	F	Yes	Phosphoribosylaminoimidazole-succinocarboxamide synthase (EC 6.3.2.6)	34822	35529	1
35460	TTC	TTT	F	F	Yes	Phosphoribosylaminoimidazole-succinocarboxamide synthase (EC 6.3.2.6)	34822	35529	1
35772	CAA	CAG	Q	Q	Yes	Phosphoribosylformylglycinamidine synthase, synthetase subunit (EC 6.3.5.3) / Phosphoribosylformylglycinamidine synthase, glutamine amidotransferase subunit (EC 6.3.5.3)	35731	39456	1
35775	GTC	GTT	V	V	Yes	Phosphoribosylformylglycinamidine synthase, synthetase subunit (EC 6.3.5.3) / Phosphoribosylformylglycinamidine synthase, glutamine amidotransferase subunit (EC 6.3.5.3)	35731	39456	1
35796	AGG	AGA	R	R	Yes	Phosphoribosylformylglycinamidine synthase, synthetase subunit (EC 6.3.5.3) / Phosphoribosylformylglycinamidine synthase, glutamine amidotransferase subunit (EC 6.3.5.3)	35731	39456	1
36138	AAA	AAG	K	K	Yes	Phosphoribosylformylglycinamidine synthase, synthetase subunit (EC 6.3.5.3) / Phosphoribosylformylglycinamidine synthase, glutamine amidotransferase subunit (EC 6.3.5.3)	35731	39456	1
36145	CTG	TTG	L	L	Yes	Phosphoribosylformylglycinamidine synthase, synthetase subunit (EC 6.3.5.3) / Phosphoribosylformylglycinamidine synthase, glutamine amidotransferase subunit (EC 6.3.5.3)	35731	39456	1
36153	AAT	AAC	N	N	Yes	Phosphoribosylformylglycinamidine synthase, synthetase subunit (EC 6.3.5.3) / Phosphoribosylformylglycinamidine synthase, glutamine amidotransferase subunit (EC 6.3.5.3)	35731	39456	1
36336	TAT	TAC	Y	Y	Yes	Phosphoribosylformylglycinamidine synthase, synthetase subunit (EC 6.3.5.3) / Phosphoribosylformylglycinamidine synthase, glutamine amidotransferase subunit (EC 6.3.5.3)	35731	39456	1
36342	AAG	AAA	K	K	Yes	Phosphoribosylformylglycinamidine synthase, synthetase subunit (EC 6.3.5.3) / Phosphoribosylformylglycinamidine synthase, glutamine amidotransferase subunit (EC 6.3.5.3)	35731	39456	1
36357	GTG	GTA	V	V	Yes	Phosphoribosylformylglycinamidine synthase, synthetase subunit (EC 6.3.5.3) / Phosphoribosylformylglycinamidine synthase, glutamine amidotransferase subunit (EC 6.3.5.3)	35731	39456	1
36363	ACA	ACG	T	T	Yes	Phosphoribosylformylglycinamidine synthase, synthetase subunit (EC 6.3.5.3) / Phosphoribosylformylglycinamidine synthase, glutamine amidotransferase subunit (EC 6.3.5.3)	35731	39456	1
36387	GAC	GAT	D	D	Yes	Phosphoribosylformylglycinamidine synthase, synthetase subunit (EC 6.3.5.3) / Phosphoribosylformylglycinamidine synthase, glutamine amidotransferase subunit (EC 6.3.5.3)	35731	39456	1
36393	TAT	TAC	Y	Y	Yes	Phosphoribosylformylglycinamidine synthase, synthetase subunit (EC 6.3.5.3) / Phosphoribosylformylglycinamidine synthase, glutamine amidotransferase subunit (EC 6.3.5.3)	35731	39456	1
36414	CAT	CAC	H	H	Yes	Phosphoribosylformylglycinamidine synthase, synthetase subunit (EC 6.3.5.3) / Phosphoribosylformylglycinamidine synthase, glutamine amidotransferase subunit (EC 6.3.5.3)	35731	39456	1
36417	ACA	ACG	T	T	Yes	Phosphoribosylformylglycinamidine synthase, synthetase subunit (EC 6.3.5.3) / Phosphoribosylformylglycinamidine synthase, glutamine amidotransferase subunit (EC 6.3.5.3)	35731	39456	1
36420	ACA	ACT	T	T	Yes	Phosphoribosylformylglycinamidine synthase, synthetase subunit (EC 6.3.5.3) / Phosphoribosylformylglycinamidine synthase, glutamine amidotransferase subunit (EC 6.3.5.3)	35731	39456	1
36423	TTC	TTT	F	F	Yes	Phosphoribosylformylglycinamidine synthase, synthetase subunit (EC 6.3.5.3) / Phosphoribosylformylglycinamidine synthase, glutamine amidotransferase subunit (EC 6.3.5.3)	35731	39456	1
36429	ACT	ACG	T	T	Yes	Phosphoribosylformylglycinamidine synthase, synthetase subunit (EC 6.3.5.3) / Phosphoribosylformylglycinamidine synthase, glutamine amidotransferase subunit (EC 6.3.5.3)	35731	39456	1
36439	AAC	CAC	N	H	No	Phosphoribosylformylglycinamidine synthase, synthetase subunit (EC 6.3.5.3) / Phosphoribosylformylglycinamidine synthase, glutamine amidotransferase subunit (EC 6.3.5.3)	35731	39456	1
36447	GAC	GAT	D	D	Yes	Phosphoribosylformylglycinamidine synthase, synthetase subunit (EC 6.3.5.3) / Phosphoribosylformylglycinamidine synthase, glutamine amidotransferase subunit (EC 6.3.5.3)	35731	39456	1
36567	TTT	TTC	F	F	Yes	Phosphoribosylformylglycinamidine synthase, synthetase subunit (EC 6.3.5.3) / Phosphoribosylformylglycinamidine synthase, glutamine amidotransferase subunit (EC 6.3.5.3)	35731	39456	1
36590	GGT	GAT	G	D	No	Phosphoribosylformylglycinamidine synthase, synthetase subunit (EC 6.3.5.3) / Phosphoribosylformylglycinamidine synthase, glutamine amidotransferase subunit (EC 6.3.5.3)	35731	39456	1
36630	GCC	GCA	A	A	Yes	Phosphoribosylformylglycinamidine synthase, synthetase subunit (EC 6.3.5.3) / Phosphoribosylformylglycinamidine synthase, glutamine amidotransferase subunit (EC 6.3.5.3)	35731	39456	1
36684	CTC	CTT	L	L	Yes	Phosphoribosylformylglycinamidine synthase, synthetase subunit (EC 6.3.5.3) / Phosphoribosylformylglycinamidine synthase, glutamine amidotransferase subunit (EC 6.3.5.3)	35731	39456	1
36690	TTT	TTC	F	F	Yes	Phosphoribosylformylglycinamidine synthase, synthetase subunit (EC 6.3.5.3) / Phosphoribosylformylglycinamidine synthase, glutamine amidotransferase subunit (EC 6.3.5.3)	35731	39456	1
36726	GAA	GAG	E	E	Yes	Phosphoribosylformylglycinamidine synthase, synthetase subunit (EC 6.3.5.3) / Phosphoribosylformylglycinamidine synthase, glutamine amidotransferase subunit (EC 6.3.5.3)	35731	39456	1
36759	GGC	GGT	G	G	Yes	Phosphoribosylformylglycinamidine synthase, synthetase subunit (EC 6.3.5.3) / Phosphoribosylformylglycinamidine synthase, glutamine amidotransferase subunit (EC 6.3.5.3)	35731	39456	1
36774	CCA	CCG	P	P	Yes	Phosphoribosylformylglycinamidine synthase, synthetase subunit (EC 6.3.5.3) / Phosphoribosylformylglycinamidine synthase, glutamine amidotransferase subunit (EC 6.3.5.3)	35731	39456	1
36783	GGC	GGG	G	G	Yes	Phosphoribosylformylglycinamidine synthase, synthetase subunit (EC 6.3.5.3) / Phosphoribosylformylglycinamidine synthase, glutamine amidotransferase subunit (EC 6.3.5.3)	35731	39456	1
36789	TCT	TCC	S	S	Yes	Phosphoribosylformylglycinamidine synthase, synthetase subunit (EC 6.3.5.3) / Phosphoribosylformylglycinamidine synthase, glutamine amidotransferase subunit (EC 6.3.5.3)	35731	39456	1
36888	AAG	AAA	K	K	Yes	Phosphoribosylformylglycinamidine synthase, synthetase subunit (EC 6.3.5.3) / Phosphoribosylformylglycinamidine synthase, glutamine amidotransferase subunit (EC 6.3.5.3)	35731	39456	1
36936	GCG	GCA	A	A	Yes	Phosphoribosylformylglycinamidine synthase, synthetase subunit (EC 6.3.5.3) / Phosphoribosylformylglycinamidine synthase, glutamine amidotransferase subunit (EC 6.3.5.3)	35731	39456	1
36969	GGC	GGT	G	G	Yes	Phosphoribosylformylglycinamidine synthase, synthetase subunit (EC 6.3.5.3) / Phosphoribosylformylglycinamidine synthase, glutamine amidotransferase subunit (EC 6.3.5.3)	35731	39456	1
36993	CTT	CTA	L	L	Yes	Phosphoribosylformylglycinamidine synthase, synthetase subunit (EC 6.3.5.3) / Phosphoribosylformylglycinamidine synthase, glutamine amidotransferase subunit (EC 6.3.5.3)	35731	39456	1
37113	GGG	GGA	G	G	Yes	Phosphoribosylformylglycinamidine synthase, synthetase subunit (EC 6.3.5.3) / Phosphoribosylformylglycinamidine synthase, glutamine amidotransferase subunit (EC 6.3.5.3)	35731	39456	1
37155	GGT	GGA	G	G	Yes	Phosphoribosylformylglycinamidine synthase, synthetase subunit (EC 6.3.5.3) / Phosphoribosylformylglycinamidine synthase, glutamine amidotransferase subunit (EC 6.3.5.3)	35731	39456	1
37197	ATT	ATC	I	I	Yes	Phosphoribosylformylglycinamidine synthase, synthetase subunit (EC 6.3.5.3) / Phosphoribosylformylglycinamidine synthase, glutamine amidotransferase subunit (EC 6.3.5.3)	35731	39456	1
37203	CGT	CGC	R	R	Yes	Phosphoribosylformylglycinamidine synthase, synthetase subunit (EC 6.3.5.3) / Phosphoribosylformylglycinamidine synthase, glutamine amidotransferase subunit (EC 6.3.5.3)	35731	39456	1
37218	GGA	GGC	G	G	Yes	Phosphoribosylformylglycinamidine synthase, synthetase subunit (EC 6.3.5.3) / Phosphoribosylformylglycinamidine synthase, glutamine amidotransferase subunit (EC 6.3.5.3)	35731	39456	1
37242	AAG	AAA	K	K	Yes	Phosphoribosylformylglycinamidine synthase, synthetase subunit (EC 6.3.5.3) / Phosphoribosylformylglycinamidine synthase, glutamine amidotransferase subunit (EC 6.3.5.3)	35731	39456	1
37248	AAT	AAC	N	N	Yes	Phosphoribosylformylglycinamidine synthase, synthetase subunit (EC 6.3.5.3) / Phosphoribosylformylglycinamidine synthase, glutamine amidotransferase subunit (EC 6.3.5.3)	35731	39456	1
37308	ATC	ATT	I	I	Yes	Phosphoribosylformylglycinamidine synthase, synthetase subunit (EC 6.3.5.3) / Phosphoribosylformylglycinamidine synthase, glutamine amidotransferase subunit (EC 6.3.5.3)	35731	39456	1
37314	CTC	CTT	L	L	Yes	Phosphoribosylformylglycinamidine synthase, synthetase subunit (EC 6.3.5.3) / Phosphoribosylformylglycinamidine synthase, glutamine amidotransferase subunit (EC 6.3.5.3)	35731	39456	1
37329	CTT	CTG	L	L	Yes	Phosphoribosylformylglycinamidine synthase, synthetase subunit (EC 6.3.5.3) / Phosphoribosylformylglycinamidine synthase, glutamine amidotransferase subunit (EC 6.3.5.3)	35731	39456	1
38679	GTC	GTA	V	V	Yes	Phosphoribosylformylglycinamidine synthase, synthetase subunit (EC 6.3.5.3) / Phosphoribosylformylglycinamidine synthase, glutamine amidotransferase subunit (EC 6.3.5.3)	35731	39456	1
38691	ACA	ACC	T	T	Yes	Phosphoribosylformylglycinamidine synthase, synthetase subunit (EC 6.3.5.3) / Phosphoribosylformylglycinamidine synthase, glutamine amidotransferase subunit (EC 6.3.5.3)	35731	39456	1
38771	GGA	GAA	G	E	No	Phosphoribosylformylglycinamidine synthase, synthetase subunit (EC 6.3.5.3) / Phosphoribosylformylglycinamidine synthase, glutamine amidotransferase subunit (EC 6.3.5.3)	35731	39456	1
38799	ACC	ACT	T	T	Yes	Phosphoribosylformylglycinamidine synthase, synthetase subunit (EC 6.3.5.3) / Phosphoribosylformylglycinamidine synthase, glutamine amidotransferase subunit (EC 6.3.5.3)	35731	39456	1
38823	GCA	GCT	A	A	Yes	Phosphoribosylformylglycinamidine synthase, synthetase subunit (EC 6.3.5.3) / Phosphoribosylformylglycinamidine synthase, glutamine amidotransferase subunit (EC 6.3.5.3)	35731	39456	1
38829	ATT	ATC	I	I	Yes	Phosphoribosylformylglycinamidine synthase, synthetase subunit (EC 6.3.5.3) / Phosphoribosylformylglycinamidine synthase, glutamine amidotransferase subunit (EC 6.3.5.3)	35731	39456	1
38847	GGA	GGT	G	G	Yes	Phosphoribosylformylglycinamidine synthase, synthetase subunit (EC 6.3.5.3) / Phosphoribosylformylglycinamidine synthase, glutamine amidotransferase subunit (EC 6.3.5.3)	35731	39456	1
38865	GAA	GAG	E	E	Yes	Phosphoribosylformylglycinamidine synthase, synthetase subunit (EC 6.3.5.3) / Phosphoribosylformylglycinamidine synthase, glutamine amidotransferase subunit (EC 6.3.5.3)	35731	39456	1
38889	ATT	ATC	I	I	Yes	Phosphoribosylformylglycinamidine synthase, synthetase subunit (EC 6.3.5.3) / Phosphoribosylformylglycinamidine synthase, glutamine amidotransferase subunit (EC 6.3.5.3)	35731	39456	1
38899	TTG	CTT	L	L	Yes	Phosphoribosylformylglycinamidine synthase, synthetase subunit (EC 6.3.5.3) / Phosphoribosylformylglycinamidine synthase, glutamine amidotransferase subunit (EC 6.3.5.3)	35731	39456	1
38901	G	T	Merged with SNP 38899
38904	CTC	CTT	L	L	Yes	Phosphoribosylformylglycinamidine synthase, synthetase subunit (EC 6.3.5.3) / Phosphoribosylformylglycinamidine synthase, glutamine amidotransferase subunit (EC 6.3.5.3)	35731	39456	1
38932	GGC	AGC	G	S	No	Phosphoribosylformylglycinamidine synthase, synthetase subunit (EC 6.3.5.3) / Phosphoribosylformylglycinamidine synthase, glutamine amidotransferase subunit (EC 6.3.5.3)	35731	39456	1
39015	GGA	GGT	G	G	Yes	Phosphoribosylformylglycinamidine synthase, synthetase subunit (EC 6.3.5.3) / Phosphoribosylformylglycinamidine synthase, glutamine amidotransferase subunit (EC 6.3.5.3)	35731	39456	1
39021	TTC	TTT	F	F	Yes	Phosphoribosylformylglycinamidine synthase, synthetase subunit (EC 6.3.5.3) / Phosphoribosylformylglycinamidine synthase, glutamine amidotransferase subunit (EC 6.3.5.3)	35731	39456	1
39024	GAG	GAA	E	E	Yes	Phosphoribosylformylglycinamidine synthase, synthetase subunit (EC 6.3.5.3) / Phosphoribosylformylglycinamidine synthase, glutamine amidotransferase subunit (EC 6.3.5.3)	35731	39456	1
39639	GAC	GAT	D	D	Yes	Amidophosphoribosyltransferase (EC 2.4.2.14)	39469	40911	1
39669	AAC	AAT	N	N	Yes	Amidophosphoribosyltransferase (EC 2.4.2.14)	39469	40911	1
39717	GTT	GTG	V	V	Yes	Amidophosphoribosyltransferase (EC 2.4.2.14)	39469	40911	1
39723	TAC	TAT	Y	Y	Yes	Amidophosphoribosyltransferase (EC 2.4.2.14)	39469	40911	1
39729	ACT	ACG	T	T	Yes	Amidophosphoribosyltransferase (EC 2.4.2.14)	39469	40911	1
39747	GTG	GTT	V	V	Yes	Amidophosphoribosyltransferase (EC 2.4.2.14)	39469	40911	1
39750	GAC	GAT	D	D	Yes	Amidophosphoribosyltransferase (EC 2.4.2.14)	39469	40911	1
39795	GGC	GGA	G	G	Yes	Amidophosphoribosyltransferase (EC 2.4.2.14)	39469	40911	1
39807	AAC	AAT	N	N	Yes	Amidophosphoribosyltransferase (EC 2.4.2.14)	39469	40911	1
39825	GCC	GCA	A	A	Yes	Amidophosphoribosyltransferase (EC 2.4.2.14)	39469	40911	1
39861	GCT	GCA	A	A	Yes	Amidophosphoribosyltransferase (EC 2.4.2.14)	39469	40911	1
39891	ATT	ATC	I	I	Yes	Amidophosphoribosyltransferase (EC 2.4.2.14)	39469	40911	1
39897	GCT	GCC	A	A	Yes	Amidophosphoribosyltransferase (EC 2.4.2.14)	39469	40911	1
40038	CCC	CCA	P	P	Yes	Amidophosphoribosyltransferase (EC 2.4.2.14)	39469	40911	1
40074	GTG	GTC	V	V	Yes	Amidophosphoribosyltransferase (EC 2.4.2.14)	39469	40911	1
40125	CGC	CGT	R	R	Yes	Amidophosphoribosyltransferase (EC 2.4.2.14)	39469	40911	1
40245	GAT	GAC	D	D	Yes	Amidophosphoribosyltransferase (EC 2.4.2.14)	39469	40911	1
40257	CAC	CAT	H	H	Yes	Amidophosphoribosyltransferase (EC 2.4.2.14)	39469	40911	1
40263	GTC	GTT	V	V	Yes	Amidophosphoribosyltransferase (EC 2.4.2.14)	39469	40911	1
40318	TAC	CAC	Y	H	No	Amidophosphoribosyltransferase (EC 2.4.2.14)	39469	40911	1
40389	TCT	TCA	S	S	Yes	Amidophosphoribosyltransferase (EC 2.4.2.14)	39469	40911	1
40413	CTC	CTG	L	L	Yes	Amidophosphoribosyltransferase (EC 2.4.2.14)	39469	40911	1
40431	ACC	ACG	T	T	Yes	Amidophosphoribosyltransferase (EC 2.4.2.14)	39469	40911	1
40437	CGC	CGT	R	R	Yes	Amidophosphoribosyltransferase (EC 2.4.2.14)	39469	40911	1
40560	ACA	ACG	T	T	Yes	Amidophosphoribosyltransferase (EC 2.4.2.14)	39469	40911	1
40575	ATT	ATC	I	I	Yes	Amidophosphoribosyltransferase (EC 2.4.2.14)	39469	40911	1
40614	CAT	CAC	H	H	Yes	Amidophosphoribosyltransferase (EC 2.4.2.14)	39469	40911	1
40626	GGT	GGG	G	G	Yes	Amidophosphoribosyltransferase (EC 2.4.2.14)	39469	40911	1
40629	AGT	AGC	S	S	Yes	Amidophosphoribosyltransferase (EC 2.4.2.14)	39469	40911	1
40632	CCA	CCT	P	P	Yes	Amidophosphoribosyltransferase (EC 2.4.2.14)	39469	40911	1
40740	AGT	AGC	S	S	Yes	Amidophosphoribosyltransferase (EC 2.4.2.14)	39469	40911	1
40755	TCT	TCG	S	S	Yes	Amidophosphoribosyltransferase (EC 2.4.2.14)	39469	40911	1
40764	GGT	GGC	G	G	Yes	Amidophosphoribosyltransferase (EC 2.4.2.14)	39469	40911	1
40803	AAT	AAC	N	N	Yes	Amidophosphoribosyltransferase (EC 2.4.2.14)	39469	40911	1
40812	CTC	CTT	L	L	Yes	Amidophosphoribosyltransferase (EC 2.4.2.14)	39469	40911	1
40818	GTA	GTC	V	V	Yes	Amidophosphoribosyltransferase (EC 2.4.2.14)	39469	40911	1
40863	GAA	GAG	E	E	Yes	Amidophosphoribosyltransferase (EC 2.4.2.14)	39469	40911	1
40886	GAT	GGT	D	G	No	Amidophosphoribosyltransferase (EC 2.4.2.14)	39469	40911	1
40887	GAT	GAG	D	E	No	Amidophosphoribosyltransferase (EC 2.4.2.14)	39469	40911	1
40890	GAA	GAT	E	D	No	Amidophosphoribosyltransferase (EC 2.4.2.14)	39469	40911	1
40973	A	T				Intergenic region
40983	A	G				Intergenic region
41024	C	G				Intergenic region
41025	T	C				Intergenic region
41047	A	C				Intergenic region
41218	CGT	CGC	R	R	Yes	Phosphoribosylformylglycinamidine cyclo-ligase (EC 6.3.3.1)	41129	42151	1
41512	GGC	GGT	G	G	Yes	Phosphoribosylformylglycinamidine cyclo-ligase (EC 6.3.3.1)	41129	42151	1
41530	GCA	GCT	A	A	Yes	Phosphoribosylformylglycinamidine cyclo-ligase (EC 6.3.3.1)	41129	42151	1
41533	GCC	GCT	A	A	Yes	Phosphoribosylformylglycinamidine cyclo-ligase (EC 6.3.3.1)	41129	42151	1
41679	GCG	GTG	A	V	No	Phosphoribosylformylglycinamidine cyclo-ligase (EC 6.3.3.1)	41129	42151	1
41698	TCG	TCA	S	S	Yes	Phosphoribosylformylglycinamidine cyclo-ligase (EC 6.3.3.1)	41129	42151	1
41740	ACG	ACA	T	T	Yes	Phosphoribosylformylglycinamidine cyclo-ligase (EC 6.3.3.1)	41129	42151	1
41782	AAG	AAA	K	K	Yes	Phosphoribosylformylglycinamidine cyclo-ligase (EC 6.3.3.1)	41129	42151	1
41785	GAG	GAA	E	E	Yes	Phosphoribosylformylglycinamidine cyclo-ligase (EC 6.3.3.1)	41129	42151	1
41821	GCT	GCA	A	A	Yes	Phosphoribosylformylglycinamidine cyclo-ligase (EC 6.3.3.1)	41129	42151	1
41894	ATC	GTT	I	V	No	Phosphoribosylformylglycinamidine cyclo-ligase (EC 6.3.3.1)	41129	42151	1
41896	C	T	Merged with SNP 41894
41953	GTG	GTC	V	V	Yes	Phosphoribosylformylglycinamidine cyclo-ligase (EC 6.3.3.1)	41129	42151	1
41959	CCG	CCT	P	P	Yes	Phosphoribosylformylglycinamidine cyclo-ligase (EC 6.3.3.1)	41129	42151	1
41971	GCT	GCC	A	A	Yes	Phosphoribosylformylglycinamidine cyclo-ligase (EC 6.3.3.1)	41129	42151	1
41987	AAA	GAA	K	E	No	Phosphoribosylformylglycinamidine cyclo-ligase (EC 6.3.3.1)	41129	42151	1
42022	AAT	AAC	N	N	Yes	Phosphoribosylformylglycinamidine cyclo-ligase (EC 6.3.3.1)	41129	42151	1
42066	GAT	GGT	D	G	No	Phosphoribosylformylglycinamidine cyclo-ligase (EC 6.3.3.1)	41129	42151	1
42070	CGT	CGC	R	R	Yes	Phosphoribosylformylglycinamidine cyclo-ligase (EC 6.3.3.1)	41129	42151	1
42082	TTA	TTG	L	L	Yes	Phosphoribosylformylglycinamidine cyclo-ligase (EC 6.3.3.1)	41129	42151	1
42083	CTG	TTG	L	L	Yes	Phosphoribosylformylglycinamidine cyclo-ligase (EC 6.3.3.1)	41129	42151	1
42204	GCT	GCC	A	A	Yes	Phosphoribosylglycinamide formyltransferase (EC 2.1.2.2)	42148	42699	1
42222	GAG	GAA	E	E	Yes	Phosphoribosylglycinamide formyltransferase (EC 2.1.2.2)	42148	42699	1
42228	GTC	GTT	V	V	Yes	Phosphoribosylglycinamide formyltransferase (EC 2.1.2.2)	42148	42699	1
42339	GCT	GCA	A	A	Yes	Phosphoribosylglycinamide formyltransferase (EC 2.1.2.2)	42148	42699	1
42718	G	A				Intergenic region
42721	A	G				Intergenic region
42727	T	C				Intergenic region
42780	CAG	TAG	Q	*	No	acetyltransferase, GNAT family	42744	43208	1
42833	GTA	GTG	V	V	Yes	acetyltransferase, GNAT family	42744	43208	1
42845	GTG	GTA	V	V	Yes	acetyltransferase, GNAT family	42744	43208	1
42848	CGC	CGT	R	R	Yes	acetyltransferase, GNAT family	42744	43208	1
42954	AAT	GAT	N	D	No	acetyltransferase, GNAT family	42744	43208	1
43052	GCT	GCC	A	A	Yes	acetyltransferase, GNAT family	42744	43208	1
43069	TAC	TGC	Y	C	No	acetyltransferase, GNAT family	42744	43208	1
43081	ATC	ACC	I	T	No	acetyltransferase, GNAT family	42744	43208	1
43128	AGT	GGT	S	G	No	acetyltransferase, GNAT family	42744	43208	1
43148	ACA	ACG	T	T	Yes	acetyltransferase, GNAT family	42744	43208	1
43150	GGA	GAA	G	E	No	acetyltransferase, GNAT family	42744	43208	1
43302	TCA	TCG	S	S	Yes	IMP cyclohydrolase (EC 3.5.4.10) / Phosphoribosylaminoimidazolecarboxamide formyltransferase (EC 2.1.2.3)	43210	44757	1
43321	GCC	ACC	A	T	No	IMP cyclohydrolase (EC 3.5.4.10) / Phosphoribosylaminoimidazolecarboxamide formyltransferase (EC 2.1.2.3)	43210	44757	1
43329	GAC	GAT	D	D	Yes	IMP cyclohydrolase (EC 3.5.4.10) / Phosphoribosylaminoimidazolecarboxamide formyltransferase (EC 2.1.2.3)	43210	44757	1
43353	GCG	GCA	A	A	Yes	IMP cyclohydrolase (EC 3.5.4.10) / Phosphoribosylaminoimidazolecarboxamide formyltransferase (EC 2.1.2.3)	43210	44757	1
43587	GGG	GGT	G	G	Yes	IMP cyclohydrolase (EC 3.5.4.10) / Phosphoribosylaminoimidazolecarboxamide formyltransferase (EC 2.1.2.3)	43210	44757	1
43593	CCA	CCG	P	P	Yes	IMP cyclohydrolase (EC 3.5.4.10) / Phosphoribosylaminoimidazolecarboxamide formyltransferase (EC 2.1.2.3)	43210	44757	1
43596	TCC	TCT	S	S	Yes	IMP cyclohydrolase (EC 3.5.4.10) / Phosphoribosylaminoimidazolecarboxamide formyltransferase (EC 2.1.2.3)	43210	44757	1
44011	TCA	CCA	S	P	No	IMP cyclohydrolase (EC 3.5.4.10) / Phosphoribosylaminoimidazolecarboxamide formyltransferase (EC 2.1.2.3)	43210	44757	1
44109	GTG	GTA	V	V	Yes	IMP cyclohydrolase (EC 3.5.4.10) / Phosphoribosylaminoimidazolecarboxamide formyltransferase (EC 2.1.2.3)	43210	44757	1
44124	GGA	GGG	G	G	Yes	IMP cyclohydrolase (EC 3.5.4.10) / Phosphoribosylaminoimidazolecarboxamide formyltransferase (EC 2.1.2.3)	43210	44757	1
44136	CTC	CTT	L	L	Yes	IMP cyclohydrolase (EC 3.5.4.10) / Phosphoribosylaminoimidazolecarboxamide formyltransferase (EC 2.1.2.3)	43210	44757	1
44193	ATC	ATT	I	I	Yes	IMP cyclohydrolase (EC 3.5.4.10) / Phosphoribosylaminoimidazolecarboxamide formyltransferase (EC 2.1.2.3)	43210	44757	1
44824	A	G				Intergenic region
44836	A	G				Intergenic region
44849	G	A				Intergenic region
44893	GTC	ATC	V	I	No	Phosphoribosylamine--glycine ligase (EC 6.3.4.13)	44878	46143	1
44901	TCT	TCG	S	S	Yes	Phosphoribosylamine--glycine ligase (EC 6.3.4.13)	44878	46143	1
44931	AAA	AAG	K	K	Yes	Phosphoribosylamine--glycine ligase (EC 6.3.4.13)	44878	46143	1
44940	GAA	GAG	E	E	Yes	Phosphoribosylamine--glycine ligase (EC 6.3.4.13)	44878	46143	1
45006	GAA	GAG	E	E	Yes	Phosphoribosylamine--glycine ligase (EC 6.3.4.13)	44878	46143	1
45009	TTG	TTA	L	L	Yes	Phosphoribosylamine--glycine ligase (EC 6.3.4.13)	44878	46143	1
45012	GTG	GTA	V	V	Yes	Phosphoribosylamine--glycine ligase (EC 6.3.4.13)	44878	46143	1
45015	AAT	AAC	N	N	Yes	Phosphoribosylamine--glycine ligase (EC 6.3.4.13)	44878	46143	1
47061	GGT	GGC	G	G	Yes	Phosphoribosylaminoimidazole carboxylase ATPase subunit (EC 4.1.1.21)	47026	48117	1
47073	GGT	GGG	G	G	Yes	Phosphoribosylaminoimidazole carboxylase ATPase subunit (EC 4.1.1.21)	47026	48117	1
49212	CAA	CAG	Q	Q	Yes	Adenylosuccinate lyase (EC 4.3.2.2)	49021	50319	1
49221	CGT	CGC	R	R	Yes	Adenylosuccinate lyase (EC 4.3.2.2)	49021	50319	1
49242	ACG	ACT	T	T	Yes	Adenylosuccinate lyase (EC 4.3.2.2)	49021	50319	1
49284	GTT	GTG	V	V	Yes	Adenylosuccinate lyase (EC 4.3.2.2)	49021	50319	1
49293	GGT	GGG	G	G	Yes	Adenylosuccinate lyase (EC 4.3.2.2)	49021	50319	1
51085	GGT	GGC	G	G	Yes	Beta-hexosaminidase (EC 3.2.1.52)	50374	54405	-1
51121	GTA	GTG	V	V	Yes	Beta-hexosaminidase (EC 3.2.1.52)	50374	54405	-1
51139	ACC	ACG	T	T	Yes	Beta-hexosaminidase (EC 3.2.1.52)	50374	54405	-1
51154	GGT	GGA	G	G	Yes	Beta-hexosaminidase (EC 3.2.1.52)	50374	54405	-1
51244	AAT	AAG	N	K	No	Beta-hexosaminidase (EC 3.2.1.52)	50374	54405	-1
51337	CTC	CTT	L	L	Yes	Beta-hexosaminidase (EC 3.2.1.52)	50374	54405	-1
51352	ACT	ACC	T	T	Yes	Beta-hexosaminidase (EC 3.2.1.52)	50374	54405	-1
51358	GCG	GCA	A	A	Yes	Beta-hexosaminidase (EC 3.2.1.52)	50374	54405	-1
51367	CTA	CTC	L	L	Yes	Beta-hexosaminidase (EC 3.2.1.52)	50374	54405	-1
51856	GGC	GGT	G	G	Yes	Beta-hexosaminidase (EC 3.2.1.52)	50374	54405	-1
51868	AAA	AAG	K	K	Yes	Beta-hexosaminidase (EC 3.2.1.52)	50374	54405	-1
52093	TTT	TTC	F	F	Yes	Beta-hexosaminidase (EC 3.2.1.52)	50374	54405	-1
52687	GCA	GCG	A	A	Yes	Beta-hexosaminidase (EC 3.2.1.52)	50374	54405	-1
52690	ATT	ATC	I	I	Yes	Beta-hexosaminidase (EC 3.2.1.52)	50374	54405	-1
52723	AGT	AGC	S	S	Yes	Beta-hexosaminidase (EC 3.2.1.52)	50374	54405	-1
52738	CTC	CTT	L	L	Yes	Beta-hexosaminidase (EC 3.2.1.52)	50374	54405	-1
52768	GTC	GTA	V	V	Yes	Beta-hexosaminidase (EC 3.2.1.52)	50374	54405	-1
52774	GCG	GCA	A	A	Yes	Beta-hexosaminidase (EC 3.2.1.52)	50374	54405	-1
52798	AAC	AAT	N	N	Yes	Beta-hexosaminidase (EC 3.2.1.52)	50374	54405	-1
52813	GTC	GTA	V	V	Yes	Beta-hexosaminidase (EC 3.2.1.52)	50374	54405	-1
52846	GAC	GAT	D	D	Yes	Beta-hexosaminidase (EC 3.2.1.52)	50374	54405	-1
52849	GCC	GCT	A	A	Yes	Beta-hexosaminidase (EC 3.2.1.52)	50374	54405	-1
52852	GCT	GCA	A	A	Yes	Beta-hexosaminidase (EC 3.2.1.52)	50374	54405	-1
52855	TTT	TTC	F	F	Yes	Beta-hexosaminidase (EC 3.2.1.52)	50374	54405	-1
52957	GGG	GGA	G	G	Yes	Beta-hexosaminidase (EC 3.2.1.52)	50374	54405	-1
52978	GGA	GGG	G	G	Yes	Beta-hexosaminidase (EC 3.2.1.52)	50374	54405	-1
53050	GGA	GGC	G	G	Yes	Beta-hexosaminidase (EC 3.2.1.52)	50374	54405	-1
53191	GAT	GAC	D	D	Yes	Beta-hexosaminidase (EC 3.2.1.52)	50374	54405	-1
53212	AGC	AGT	S	S	Yes	Beta-hexosaminidase (EC 3.2.1.52)	50374	54405	-1
53227	TAT	TAC	Y	Y	Yes	Beta-hexosaminidase (EC 3.2.1.52)	50374	54405	-1
53239	GAT	GAC	D	D	Yes	Beta-hexosaminidase (EC 3.2.1.52)	50374	54405	-1
53248	GCC	GCT	A	A	Yes	Beta-hexosaminidase (EC 3.2.1.52)	50374	54405	-1
53293	AAC	AAT	N	N	Yes	Beta-hexosaminidase (EC 3.2.1.52)	50374	54405	-1
53296	GCA	GCT	A	A	Yes	Beta-hexosaminidase (EC 3.2.1.52)	50374	54405	-1
53314	GAC	GAT	D	D	Yes	Beta-hexosaminidase (EC 3.2.1.52)	50374	54405	-1
53326	GAT	GAC	D	D	Yes	Beta-hexosaminidase (EC 3.2.1.52)	50374	54405	-1
53335	GGC	GAA	G	E	No	Beta-hexosaminidase (EC 3.2.1.52)	50374	54405	-1
53336	C	T	Merged with SNP 53335
53344	CCC	CCA	P	P	Yes	Beta-hexosaminidase (EC 3.2.1.52)	50374	54405	-1
53353	AAG	AAA	K	K	Yes	Beta-hexosaminidase (EC 3.2.1.52)	50374	54405	-1
53356	TAC	TAT	Y	Y	Yes	Beta-hexosaminidase (EC 3.2.1.52)	50374	54405	-1
53386	AAC	GAT	N	D	No	Beta-hexosaminidase (EC 3.2.1.52)	50374	54405	-1
53388	T	C	Merged with SNP 53386
53422	AAT	AAC	N	N	Yes	Beta-hexosaminidase (EC 3.2.1.52)	50374	54405	-1
53446	TTC	TTT	F	F	Yes	Beta-hexosaminidase (EC 3.2.1.52)	50374	54405	-1
53452	GCT	GCA	A	A	Yes	Beta-hexosaminidase (EC 3.2.1.52)	50374	54405	-1
53473	GCT	GCC	A	A	Yes	Beta-hexosaminidase (EC 3.2.1.52)	50374	54405	-1
53485	GCA	GAG	A	E	No	Beta-hexosaminidase (EC 3.2.1.52)	50374	54405	-1
53486	G	T	Merged with SNP 53485
53494	GAG	GAA	E	E	Yes	Beta-hexosaminidase (EC 3.2.1.52)	50374	54405	-1
53497	AAG	AAA	K	K	Yes	Beta-hexosaminidase (EC 3.2.1.52)	50374	54405	-1
53623	ATT	ATC	I	I	Yes	Beta-hexosaminidase (EC 3.2.1.52)	50374	54405	-1
53629	GGC	GGT	G	G	Yes	Beta-hexosaminidase (EC 3.2.1.52)	50374	54405	-1
53635	GGT	GGC	G	G	Yes	Beta-hexosaminidase (EC 3.2.1.52)	50374	54405	-1
53641	AAT	AAC	N	N	Yes	Beta-hexosaminidase (EC 3.2.1.52)	50374	54405	-1
53650	TAC	TAT	Y	Y	Yes	Beta-hexosaminidase (EC 3.2.1.52)	50374	54405	-1
53671	CAG	CAA	Q	Q	Yes	Beta-hexosaminidase (EC 3.2.1.52)	50374	54405	-1
53677	GAA	GAG	E	E	Yes	Beta-hexosaminidase (EC 3.2.1.52)	50374	54405	-1
53718	GAT	AAT	D	N	No	Beta-hexosaminidase (EC 3.2.1.52)	50374	54405	-1
53719	ACT	ACC	T	T	Yes	Beta-hexosaminidase (EC 3.2.1.52)	50374	54405	-1
53749	GAC	GAT	D	D	Yes	Beta-hexosaminidase (EC 3.2.1.52)	50374	54405	-1
53773	GCG	GCC	A	A	Yes	Beta-hexosaminidase (EC 3.2.1.52)	50374	54405	-1
54477	A	G				Intergenic region
54518	A	G				Intergenic region
54526	T	A				Intergenic region
54545	T	A				Intergenic region
54591	C	A				Intergenic region
54639	C	T				Intergenic region
54646	C	A				Intergenic region
54675	T	C				Intergenic region
54687	A	G				Intergenic region
54876	ACT	ACA	T	T	Yes	Transcriptional regulator, GntR family	54708	55424	-1
55038	GTG	GTA	V	V	Yes	Transcriptional regulator, GntR family	54708	55424	-1
55041	GAT	GAC	D	D	Yes	Transcriptional regulator, GntR family	54708	55424	-1
55131	GAA	GAG	E	E	Yes	Transcriptional regulator, GntR family	54708	55424	-1
55155	GAC	GAT	D	D	Yes	Transcriptional regulator, GntR family	54708	55424	-1
55179	GTT	GTC	V	V	Yes	Transcriptional regulator, GntR family	54708	55424	-1
55209	CGT	CGC	R	R	Yes	Transcriptional regulator, GntR family	54708	55424	-1
55230	GGA	GGT	G	G	Yes	Transcriptional regulator, GntR family	54708	55424	-1
55245	CGT	CGC	R	R	Yes	Transcriptional regulator, GntR family	54708	55424	-1
55254	TAT	TAC	Y	Y	Yes	Transcriptional regulator, GntR family	54708	55424	-1
55266	GCA	GCT	A	A	Yes	Transcriptional regulator, GntR family	54708	55424	-1
55278	TTG	TTA	L	L	Yes	Transcriptional regulator, GntR family	54708	55424	-1
55281	GCT	GCC	A	A	Yes	Transcriptional regulator, GntR family	54708	55424	-1
55293	ACC	ACA	T	T	Yes	Transcriptional regulator, GntR family	54708	55424	-1
55299	TCG	TCA	S	S	Yes	Transcriptional regulator, GntR family	54708	55424	-1
55305	GTT	GTG	V	V	Yes	Transcriptional regulator, GntR family	54708	55424	-1
55320	ATT	ATC	I	I	Yes	Transcriptional regulator, GntR family	54708	55424	-1
55329	GCA	GCC	A	A	Yes	Transcriptional regulator, GntR family	54708	55424	-1
55356	GCG	GCA	A	A	Yes	Transcriptional regulator, GntR family	54708	55424	-1
55368	TCA	TCT	S	S	Yes	Transcriptional regulator, GntR family	54708	55424	-1
55598	G	T				Intergenic region
55605	T	A				Intergenic region
55651	G	T				Intergenic region
55695	T	G				Intergenic region
56025	CCA	CCG	P	P	Yes	Beta-galactosidase 3	55747	57534	1
56076	ACA	ACC	T	T	Yes	Beta-galactosidase 3	55747	57534	1
56178	AAT	AAC	N	N	Yes	Beta-galactosidase 3	55747	57534	1
56181	GGT	GGC	G	G	Yes	Beta-galactosidase 3	55747	57534	1
56193	CTT	CTC	L	L	Yes	Beta-galactosidase 3	55747	57534	1
56265	TTG	TTA	L	L	Yes	Beta-galactosidase 3	55747	57534	1
56346	ATC	ATT	I	I	Yes	Beta-galactosidase 3	55747	57534	1
56379	GGC	GGT	G	G	Yes	Beta-galactosidase 3	55747	57534	1
56505	ACA	ACT	T	T	Yes	Beta-galactosidase 3	55747	57534	1
56508	CGG	CGT	R	R	Yes	Beta-galactosidase 3	55747	57534	1
56586	GGA	GGT	G	G	Yes	Beta-galactosidase 3	55747	57534	1
56640	CCA	CCG	P	P	Yes	Beta-galactosidase 3	55747	57534	1
56652	TCA	TCT	S	S	Yes	Beta-galactosidase 3	55747	57534	1
56742	GAT	GAG	D	E	No	Beta-galactosidase 3	55747	57534	1
56826	ACT	ACC	T	T	Yes	Beta-galactosidase 3	55747	57534	1
56834	AGT	AAT	S	N	No	Beta-galactosidase 3	55747	57534	1
56915	AAT	ACT	N	T	No	Beta-galactosidase 3	55747	57534	1
56916	AAT	AAG	N	K	No	Beta-galactosidase 3	55747	57534	1
56940	GAA	GAG	E	E	Yes	Beta-galactosidase 3	55747	57534	1
56979	CAG	CAA	Q	Q	Yes	Beta-galactosidase 3	55747	57534	1
57027	ATA	ATT	I	I	Yes	Beta-galactosidase 3	55747	57534	1
57030	GGT	GGC	G	G	Yes	Beta-galactosidase 3	55747	57534	1
57036	GAT	GAC	D	D	Yes	Beta-galactosidase 3	55747	57534	1
57048	CAG	CAA	Q	Q	Yes	Beta-galactosidase 3	55747	57534	1
57054	AAT	AAC	N	N	Yes	Beta-galactosidase 3	55747	57534	1
57072	GAA	GAG	E	E	Yes	Beta-galactosidase 3	55747	57534	1
57087	ATC	ATT	I	I	Yes	Beta-galactosidase 3	55747	57534	1
57114	GGT	GGA	G	G	Yes	Beta-galactosidase 3	55747	57534	1
57123	TTC	TTT	F	F	Yes	Beta-galactosidase 3	55747	57534	1
57138	CAA	CAG	Q	Q	Yes	Beta-galactosidase 3	55747	57534	1
57153	CGT	CGA	R	R	Yes	Beta-galactosidase 3	55747	57534	1
57228	AAA	AAG	K	K	Yes	Beta-galactosidase 3	55747	57534	1
57261	CAG	CAA	Q	Q	Yes	Beta-galactosidase 3	55747	57534	1
57288	ACG	ACT	T	T	Yes	Beta-galactosidase 3	55747	57534	1
57291	GTC	GTT	V	V	Yes	Beta-galactosidase 3	55747	57534	1
57364	TTA	CTA	L	L	Yes	Beta-galactosidase 3	55747	57534	1
57369	GGA	GGG	G	G	Yes	Beta-galactosidase 3	55747	57534	1
57417	AGC	AGT	S	S	Yes	Beta-galactosidase 3	55747	57534	1
57486	CAT	CAC	H	H	Yes	Beta-galactosidase 3	55747	57534	1
57893	AAC	AAT	N	N	Yes	Predicted PTS system, galactosamine-specific IIB component (EC 2.7.1.69)	57531	58007	1
58043	TGG	CCG	W	P	No	Predicted PTS system, galactosamine-specific IIC component (EC 2.7.1.69)	58034	58939	1
58044	G	C	Merged with SNP 58043
58153	TTG	TTA	L	L	Yes	Predicted PTS system, galactosamine-specific IIC component (EC 2.7.1.69)	58034	58939	1
58228	TTT	TTC	F	F	Yes	Predicted PTS system, galactosamine-specific IIC component (EC 2.7.1.69)	58034	58939	1
58309	GAT	GAC	D	D	Yes	Predicted PTS system, galactosamine-specific IIC component (EC 2.7.1.69)	58034	58939	1
58342	GCA	GCG	A	A	Yes	Predicted PTS system, galactosamine-specific IIC component (EC 2.7.1.69)	58034	58939	1
58466	ATT	CTT	I	L	No	Predicted PTS system, galactosamine-specific IIC component (EC 2.7.1.69)	58034	58939	1
58507	GCC	GCT	A	A	Yes	Predicted PTS system, galactosamine-specific IIC component (EC 2.7.1.69)	58034	58939	1
58516	TTC	TTT	F	F	Yes	Predicted PTS system, galactosamine-specific IIC component (EC 2.7.1.69)	58034	58939	1
58585	ACT	ACA	T	T	Yes	Predicted PTS system, galactosamine-specific IIC component (EC 2.7.1.69)	58034	58939	1
58618	TTC	TTT	F	F	Yes	Predicted PTS system, galactosamine-specific IIC component (EC 2.7.1.69)	58034	58939	1
58621	GCT	GCA	A	A	Yes	Predicted PTS system, galactosamine-specific IIC component (EC 2.7.1.69)	58034	58939	1
58834	GTG	GTA	V	V	Yes	Predicted PTS system, galactosamine-specific IIC component (EC 2.7.1.69)	58034	58939	1
58849	GCA	GCG	A	A	Yes	Predicted PTS system, galactosamine-specific IIC component (EC 2.7.1.69)	58034	58939	1
58921	ATC	ATT	I	I	Yes	Predicted PTS system, galactosamine-specific IIC component (EC 2.7.1.69)	58034	58939	1
58947	CTA	TTA	L	L	Yes	Predicted PTS system, galactosamine-specific IID component (EC 2.7.1.69)	58926	59747	1
58973	ATC	ATT	I	I	Yes	Predicted PTS system, galactosamine-specific IID component (EC 2.7.1.69)	58926	59747	1
58991	TTT	TTC	F	F	Yes	Predicted PTS system, galactosamine-specific IID component (EC 2.7.1.69)	58926	59747	1
59003	TTA	TTG	L	L	Yes	Predicted PTS system, galactosamine-specific IID component (EC 2.7.1.69)	58926	59747	1
59006	GGT	GGA	G	G	Yes	Predicted PTS system, galactosamine-specific IID component (EC 2.7.1.69)	58926	59747	1
59030	GCT	GCA	A	A	Yes	Predicted PTS system, galactosamine-specific IID component (EC 2.7.1.69)	58926	59747	1
59033	TCT	TCA	S	S	Yes	Predicted PTS system, galactosamine-specific IID component (EC 2.7.1.69)	58926	59747	1
59078	GGG	GGA	G	G	Yes	Predicted PTS system, galactosamine-specific IID component (EC 2.7.1.69)	58926	59747	1
59093	GAA	GAG	E	E	Yes	Predicted PTS system, galactosamine-specific IID component (EC 2.7.1.69)	58926	59747	1
59132	AAT	AAC	N	N	Yes	Predicted PTS system, galactosamine-specific IID component (EC 2.7.1.69)	58926	59747	1
59153	ACT	ACA	T	T	Yes	Predicted PTS system, galactosamine-specific IID component (EC 2.7.1.69)	58926	59747	1
59177	GCC	GCT	A	A	Yes	Predicted PTS system, galactosamine-specific IID component (EC 2.7.1.69)	58926	59747	1
59195	GGT	GGC	G	G	Yes	Predicted PTS system, galactosamine-specific IID component (EC 2.7.1.69)	58926	59747	1
59198	GTG	GTT	V	V	Yes	Predicted PTS system, galactosamine-specific IID component (EC 2.7.1.69)	58926	59747	1
59213	GCC	GCG	A	A	Yes	Predicted PTS system, galactosamine-specific IID component (EC 2.7.1.69)	58926	59747	1
59309	GCA	GCT	A	A	Yes	Predicted PTS system, galactosamine-specific IID component (EC 2.7.1.69)	58926	59747	1
59315	ACT	ACA	T	T	Yes	Predicted PTS system, galactosamine-specific IID component (EC 2.7.1.69)	58926	59747	1
59321	GCG	GCT	A	A	Yes	Predicted PTS system, galactosamine-specific IID component (EC 2.7.1.69)	58926	59747	1
59324	ATC	ATT	I	I	Yes	Predicted PTS system, galactosamine-specific IID component (EC 2.7.1.69)	58926	59747	1
59330	GGC	GGT	G	G	Yes	Predicted PTS system, galactosamine-specific IID component (EC 2.7.1.69)	58926	59747	1
59336	CCA	CCT	P	P	Yes	Predicted PTS system, galactosamine-specific IID component (EC 2.7.1.69)	58926	59747	1
59357	ATC	ATT	I	I	Yes	Predicted PTS system, galactosamine-specific IID component (EC 2.7.1.69)	58926	59747	1
59369	GTT	GTA	V	V	Yes	Predicted PTS system, galactosamine-specific IID component (EC 2.7.1.69)	58926	59747	1
59372	GCA	GCG	A	A	Yes	Predicted PTS system, galactosamine-specific IID component (EC 2.7.1.69)	58926	59747	1
59396	CAA	CAG	Q	Q	Yes	Predicted PTS system, galactosamine-specific IID component (EC 2.7.1.69)	58926	59747	1
59408	GCC	GCA	A	A	Yes	Predicted PTS system, galactosamine-specific IID component (EC 2.7.1.69)	58926	59747	1
59468	GAT	GAA	D	E	No	Predicted PTS system, galactosamine-specific IID component (EC 2.7.1.69)	58926	59747	1
59489	GTC	GTA	V	V	Yes	Predicted PTS system, galactosamine-specific IID component (EC 2.7.1.69)	58926	59747	1
59531	GAG	GAA	E	E	Yes	Predicted PTS system, galactosamine-specific IID component (EC 2.7.1.69)	58926	59747	1
59537	TCT	TCA	S	S	Yes	Predicted PTS system, galactosamine-specific IID component (EC 2.7.1.69)	58926	59747	1
59546	TTG	TTA	L	L	Yes	Predicted PTS system, galactosamine-specific IID component (EC 2.7.1.69)	58926	59747	1
59603	CGC	CGT	R	R	Yes	Predicted PTS system, galactosamine-specific IID component (EC 2.7.1.69)	58926	59747	1
59621	TTT	TTC	F	F	Yes	Predicted PTS system, galactosamine-specific IID component (EC 2.7.1.69)	58926	59747	1
59627	GCC	GCA	A	A	Yes	Predicted PTS system, galactosamine-specific IID component (EC 2.7.1.69)	58926	59747	1
59669	ACT	ACA	T	T	Yes	Predicted PTS system, galactosamine-specific IID component (EC 2.7.1.69)	58926	59747	1
59675	GCG	GCT	A	A	Yes	Predicted PTS system, galactosamine-specific IID component (EC 2.7.1.69)	58926	59747	1
60502	GAA	GAG	E	E	Yes	Galactosamine-6-phosphate isomerase (EC 5.3.1.-)	60413	61579	1
60523	GCG	GCA	A	A	Yes	Galactosamine-6-phosphate isomerase (EC 5.3.1.-)	60413	61579	1
60529	CGG	CGT	R	R	Yes	Galactosamine-6-phosphate isomerase (EC 5.3.1.-)	60413	61579	1
60559	ATT	ATC	I	I	Yes	Galactosamine-6-phosphate isomerase (EC 5.3.1.-)	60413	61579	1
60562	GCG	GCT	A	A	Yes	Galactosamine-6-phosphate isomerase (EC 5.3.1.-)	60413	61579	1
60568	AAA	AAG	K	K	Yes	Galactosamine-6-phosphate isomerase (EC 5.3.1.-)	60413	61579	1
60595	ACA	ACG	T	T	Yes	Galactosamine-6-phosphate isomerase (EC 5.3.1.-)	60413	61579	1
60604	GGG	GGT	G	G	Yes	Galactosamine-6-phosphate isomerase (EC 5.3.1.-)	60413	61579	1
60634	GTG	GTA	V	V	Yes	Galactosamine-6-phosphate isomerase (EC 5.3.1.-)	60413	61579	1
60635	TCT	CCA	S	P	No	Galactosamine-6-phosphate isomerase (EC 5.3.1.-)	60413	61579	1
60637	T	A	Merged with SNP 60635
60658	GAC	GAT	D	D	Yes	Galactosamine-6-phosphate isomerase (EC 5.3.1.-)	60413	61579	1
60769	GGA	GGG	G	G	Yes	Galactosamine-6-phosphate isomerase (EC 5.3.1.-)	60413	61579	1
60790	GCA	GCG	A	A	Yes	Galactosamine-6-phosphate isomerase (EC 5.3.1.-)	60413	61579	1
60805	GCT	GCC	A	A	Yes	Galactosamine-6-phosphate isomerase (EC 5.3.1.-)	60413	61579	1
60817	GTG	GTT	V	V	Yes	Galactosamine-6-phosphate isomerase (EC 5.3.1.-)	60413	61579	1
60856	GAA	GAT	E	D	No	Galactosamine-6-phosphate isomerase (EC 5.3.1.-)	60413	61579	1
60859	GGG	GGT	G	G	Yes	Galactosamine-6-phosphate isomerase (EC 5.3.1.-)	60413	61579	1
60883	GGA	GGC	G	G	Yes	Galactosamine-6-phosphate isomerase (EC 5.3.1.-)	60413	61579	1
60898	CTC	CTT	L	L	Yes	Galactosamine-6-phosphate isomerase (EC 5.3.1.-)	60413	61579	1
60901	TTG	TTA	L	L	Yes	Galactosamine-6-phosphate isomerase (EC 5.3.1.-)	60413	61579	1
60922	TCT	TCC	S	S	Yes	Galactosamine-6-phosphate isomerase (EC 5.3.1.-)	60413	61579	1
60958	ACA	ACG	T	T	Yes	Galactosamine-6-phosphate isomerase (EC 5.3.1.-)	60413	61579	1
60961	TCT	TCC	S	S	Yes	Galactosamine-6-phosphate isomerase (EC 5.3.1.-)	60413	61579	1
60965	CTG	ATG	L	M	No	Galactosamine-6-phosphate isomerase (EC 5.3.1.-)	60413	61579	1
60985	GTC	GTT	V	V	Yes	Galactosamine-6-phosphate isomerase (EC 5.3.1.-)	60413	61579	1
61016	CAA	GAA	Q	E	No	Galactosamine-6-phosphate isomerase (EC 5.3.1.-)	60413	61579	1
61135	TTC	TTT	F	F	Yes	Galactosamine-6-phosphate isomerase (EC 5.3.1.-)	60413	61579	1
61138	GGC	GGA	G	G	Yes	Galactosamine-6-phosphate isomerase (EC 5.3.1.-)	60413	61579	1
61177	ACA	ACT	T	T	Yes	Galactosamine-6-phosphate isomerase (EC 5.3.1.-)	60413	61579	1
61246	AAC	AAT	N	N	Yes	Galactosamine-6-phosphate isomerase (EC 5.3.1.-)	60413	61579	1
61265	GTC	ATC	V	I	No	Galactosamine-6-phosphate isomerase (EC 5.3.1.-)	60413	61579	1
61273	GGT	GGC	G	G	Yes	Galactosamine-6-phosphate isomerase (EC 5.3.1.-)	60413	61579	1
61280	ACA	TCA	T	S	No	Galactosamine-6-phosphate isomerase (EC 5.3.1.-)	60413	61579	1
61303	GAT	GAC	D	D	Yes	Galactosamine-6-phosphate isomerase (EC 5.3.1.-)	60413	61579	1
61312	TTG	TTA	L	L	Yes	Galactosamine-6-phosphate isomerase (EC 5.3.1.-)	60413	61579	1
61333	GAC	GAT	D	D	Yes	Galactosamine-6-phosphate isomerase (EC 5.3.1.-)	60413	61579	1
61351	GTC	GTT	V	V	Yes	Galactosamine-6-phosphate isomerase (EC 5.3.1.-)	60413	61579	1
61399	GTA	GTG	V	V	Yes	Galactosamine-6-phosphate isomerase (EC 5.3.1.-)	60413	61579	1
61441	GTT	GTC	V	V	Yes	Galactosamine-6-phosphate isomerase (EC 5.3.1.-)	60413	61579	1
61462	GCT	GCC	A	A	Yes	Galactosamine-6-phosphate isomerase (EC 5.3.1.-)	60413	61579	1
61477	CTC	CTT	L	L	Yes	Galactosamine-6-phosphate isomerase (EC 5.3.1.-)	60413	61579	1
61486	TCA	TCG	S	S	Yes	Galactosamine-6-phosphate isomerase (EC 5.3.1.-)	60413	61579	1
61496	GAA	AAA	E	K	No	Galactosamine-6-phosphate isomerase (EC 5.3.1.-)	60413	61579	1
61501	AAT	AAC	N	N	Yes	Galactosamine-6-phosphate isomerase (EC 5.3.1.-)	60413	61579	1
61516	CCA	CCG	P	P	Yes	Galactosamine-6-phosphate isomerase (EC 5.3.1.-)	60413	61579	1
61555	GTG	GTT	V	V	Yes	Galactosamine-6-phosphate isomerase (EC 5.3.1.-)	60413	61579	1
61576	AAG	AAA	K	K	Yes	Galactosamine-6-phosphate isomerase (EC 5.3.1.-)	60413	61579	1
61586	G	A				Intergenic region
61652	AAC	AAT	N	N	Yes	Tagatose 1,6-bisphosphate aldolase (EC 4.1.2.40)	61590	62585	1
61655	GGC	GGA	G	G	Yes	Tagatose 1,6-bisphosphate aldolase (EC 4.1.2.40)	61590	62585	1
61658	ATT	ATC	I	I	Yes	Tagatose 1,6-bisphosphate aldolase (EC 4.1.2.40)	61590	62585	1
61715	TAT	TAC	Y	Y	Yes	Tagatose 1,6-bisphosphate aldolase (EC 4.1.2.40)	61590	62585	1
61738	GAT	GCT	D	A	No	Tagatose 1,6-bisphosphate aldolase (EC 4.1.2.40)	61590	62585	1
61793	TCA	TCC	S	S	Yes	Tagatose 1,6-bisphosphate aldolase (EC 4.1.2.40)	61590	62585	1
61961	GCT	GCA	A	A	Yes	Tagatose 1,6-bisphosphate aldolase (EC 4.1.2.40)	61590	62585	1
61988	TAT	TAC	Y	Y	Yes	Tagatose 1,6-bisphosphate aldolase (EC 4.1.2.40)	61590	62585	1
62168	GCT	GCC	A	A	Yes	Tagatose 1,6-bisphosphate aldolase (EC 4.1.2.40)	61590	62585	1
62258	GAA	GAT	E	D	No	Tagatose 1,6-bisphosphate aldolase (EC 4.1.2.40)	61590	62585	1
62279	CGT	CGC	R	R	Yes	Tagatose 1,6-bisphosphate aldolase (EC 4.1.2.40)	61590	62585	1
62704	A	G				Intergenic region
62748	GAA	GAG	E	E	Yes	Aldose 1-epimerase (EC 5.1.3.3)	62731	63768	1
62787	GCT	GCC	A	A	Yes	Aldose 1-epimerase (EC 5.1.3.3)	62731	63768	1
62814	TAC	TAT	Y	Y	Yes	Aldose 1-epimerase (EC 5.1.3.3)	62731	63768	1
62847	ATA	ATC	I	I	Yes	Aldose 1-epimerase (EC 5.1.3.3)	62731	63768	1
62880	AAT	AAC	N	N	Yes	Aldose 1-epimerase (EC 5.1.3.3)	62731	63768	1
62901	GGT	GGA	G	G	Yes	Aldose 1-epimerase (EC 5.1.3.3)	62731	63768	1
62915	GAT	GCT	D	A	No	Aldose 1-epimerase (EC 5.1.3.3)	62731	63768	1
62967	GCG	GCA	A	A	Yes	Aldose 1-epimerase (EC 5.1.3.3)	62731	63768	1
62979	GCA	GCT	A	A	Yes	Aldose 1-epimerase (EC 5.1.3.3)	62731	63768	1
62982	GGT	GGA	G	G	Yes	Aldose 1-epimerase (EC 5.1.3.3)	62731	63768	1
62994	GAG	GAA	E	E	Yes	Aldose 1-epimerase (EC 5.1.3.3)	62731	63768	1
63013	AAT	GAC	N	D	No	Aldose 1-epimerase (EC 5.1.3.3)	62731	63768	1
63015	T	C	Merged with SNP 63013
63030	AAC	AAT	N	N	Yes	Aldose 1-epimerase (EC 5.1.3.3)	62731	63768	1
63072	TCG	TCC	S	S	Yes	Aldose 1-epimerase (EC 5.1.3.3)	62731	63768	1
63108	GGC	GGT	G	G	Yes	Aldose 1-epimerase (EC 5.1.3.3)	62731	63768	1
63114	ACC	ACT	T	T	Yes	Aldose 1-epimerase (EC 5.1.3.3)	62731	63768	1
63123	ACA	ACC	T	T	Yes	Aldose 1-epimerase (EC 5.1.3.3)	62731	63768	1
63126	GAA	GAG	E	E	Yes	Aldose 1-epimerase (EC 5.1.3.3)	62731	63768	1
63168	ATC	ATT	I	I	Yes	Aldose 1-epimerase (EC 5.1.3.3)	62731	63768	1
63174	ATC	ATT	I	I	Yes	Aldose 1-epimerase (EC 5.1.3.3)	62731	63768	1
63180	TAT	TAC	Y	Y	Yes	Aldose 1-epimerase (EC 5.1.3.3)	62731	63768	1
63273	AAC	AAT	N	N	Yes	Aldose 1-epimerase (EC 5.1.3.3)	62731	63768	1
63318	CAG	CAA	Q	Q	Yes	Aldose 1-epimerase (EC 5.1.3.3)	62731	63768	1
63319	CTA	TTA	L	L	Yes	Aldose 1-epimerase (EC 5.1.3.3)	62731	63768	1
63327	ACC	ACG	T	T	Yes	Aldose 1-epimerase (EC 5.1.3.3)	62731	63768	1
63333	GGT	GGC	G	G	Yes	Aldose 1-epimerase (EC 5.1.3.3)	62731	63768	1
63429	GAC	GAT	D	D	Yes	Aldose 1-epimerase (EC 5.1.3.3)	62731	63768	1
63437	GAA	GCA	E	A	No	Aldose 1-epimerase (EC 5.1.3.3)	62731	63768	1
63444	GAA	GAC	E	D	No	Aldose 1-epimerase (EC 5.1.3.3)	62731	63768	1
63460	TTG	CTG	L	L	Yes	Aldose 1-epimerase (EC 5.1.3.3)	62731	63768	1
63498	GCC	GCA	A	A	Yes	Aldose 1-epimerase (EC 5.1.3.3)	62731	63768	1
63532	AAC	CAC	N	H	No	Aldose 1-epimerase (EC 5.1.3.3)	62731	63768	1
63552	CTG	CTT	L	L	Yes	Aldose 1-epimerase (EC 5.1.3.3)	62731	63768	1
63567	GCC	GCT	A	A	Yes	Aldose 1-epimerase (EC 5.1.3.3)	62731	63768	1
63666	CAG	CAA	Q	Q	Yes	Aldose 1-epimerase (EC 5.1.3.3)	62731	63768	1
63687	CAT	CAC	H	H	Yes	Aldose 1-epimerase (EC 5.1.3.3)	62731	63768	1
63690	AGC	AGT	S	S	Yes	Aldose 1-epimerase (EC 5.1.3.3)	62731	63768	1
63724	GAA	CAA	E	Q	No	Aldose 1-epimerase (EC 5.1.3.3)	62731	63768	1
63729	ACT	ACC	T	T	Yes	Aldose 1-epimerase (EC 5.1.3.3)	62731	63768	1
63732	TTC	TTT	F	F	Yes	Aldose 1-epimerase (EC 5.1.3.3)	62731	63768	1
63735	ACC	ACT	T	T	Yes	Aldose 1-epimerase (EC 5.1.3.3)	62731	63768	1
63747	CGT	CGC	R	R	Yes	Aldose 1-epimerase (EC 5.1.3.3)	62731	63768	1
63762	GTC	GTT	V	V	Yes	Aldose 1-epimerase (EC 5.1.3.3)	62731	63768	1
63802	T	A				Intergenic region
63845	T	C				Intergenic region
63846	A	T				Intergenic region
63920	GCG	GCT	A	A	Yes	Glyoxalase family protein	63879	64733	1
63938	GAT	GAC	D	D	Yes	Glyoxalase family protein	63879	64733	1
63968	CAA	CAG	Q	Q	Yes	Glyoxalase family protein	63879	64733	1
64022	CTT	CTC	L	L	Yes	Glyoxalase family protein	63879	64733	1
64062	TCT	GCT	S	A	No	Glyoxalase family protein	63879	64733	1
64098	CTG	TTG	L	L	Yes	Glyoxalase family protein	63879	64733	1
64107	CTG	TTG	L	L	Yes	Glyoxalase family protein	63879	64733	1
64157	GAT	GAC	D	D	Yes	Glyoxalase family protein	63879	64733	1
64178	GGG	GGA	G	G	Yes	Glyoxalase family protein	63879	64733	1
64262	GTG	GTA	V	V	Yes	Glyoxalase family protein	63879	64733	1
64279	CTA	CGA	L	R	No	Glyoxalase family protein	63879	64733	1
64307	ACC	ACT	T	T	Yes	Glyoxalase family protein	63879	64733	1
64310	GAG	GAA	E	E	Yes	Glyoxalase family protein	63879	64733	1
64313	GCT	GCC	A	A	Yes	Glyoxalase family protein	63879	64733	1
64337	GAA	GAG	E	E	Yes	Glyoxalase family protein	63879	64733	1
[truncated: 41,134 more rows]

## Sheet: Streptococcus GMD-4
SNP_position	Ref_codon	Sub_codon	aa_Ref	aa_Sub	Synonymous	Product	CDS_start	CDS_end	CDS_strand
[truncated: 16,340 more rows]

[truncated: 2 more sheets: Streptococcus GMD-5, Streptococcus GMD-6]
