# Supplementary material for: Nearly finished genomes produced using gel microdroplet culturing reveal substantial intraspecies genomic diversity within the human microbiome
Source: HighWire-hosted journal article supplement (doi:10.1101/gr.142208.112), 2013-03-14
Supplement: Supp_Data3.xlsx [file Supp_Data3.xlsx]

## Sheet: SupplementaryData3.2ndrev.txt
Region	Start	Stop	Length	Function
1	256857	258074	1218	Integrase
1	258369	259481	1113	Immunogenic secreted protein
1	259496	259720	225	unnamed protein product
1	259698	261584	1887	FIG01118454: hypothetical protein
1	261596	264028	2433	conjugal transfer protein2C putative
1	264113	264523	411	FIG01116994: hypothetical protein
1	264526	264750	225	FIG01115107: hypothetical protein
1	264762	265757	996	FIG01116888: hypothetical protein
1	265769	266326	558	FIG01115881: hypothetical protein
1	266328	266561	234	hypothetical protein
1	266577	267809	1233	transcriptional regulator2C Cro/CI family
1	268014	269702	1689	FtsK/SpoIIIE family protein
1	269713	270168	456	hypothetical protein
1	270191	270487	297	putative transfer protein
1	271343	271690	348	transcriptional regulator
1	271723	273222	1500	EA59 gene protein
1	273209	274162	954	hypothetical protein
1	274260	275117	858	putative transcriptional regulator
1	275126	275812	687	putative repressor protein
1	275816	277231	1416	ImpB/MucB/SamB family protein
1	277228	277590	363	hypothetical protein
1	277583	277864	282	hypothetical protein
1	278338	279039	702	hypothetical protein
1	279052	280509	1458	hypothetical protein
1	281085	281447	363	hypothetical protein
1	281680	282303	624	hypothetical protein
1	282305	283027	723	hypothetical protein
1	283024	283257	234	hypothetical protein
1	283232	284173	942	hypothetical protein
1	285012	285875	864	5-methylcytosine-specific restriction enzyme A (EC 3.1.21.-);Ontology_term=KEGG_ENZYME:3.1.21.-
1	286073	286873	801	DNA modification methyltransferase (EC 2.1.1.-);Ontology_term=KEGG_ENZYME:2.1.1.-
1	286876	287718	843	Methyl-directed repair DNA adenine methylase (EC 2.1.1.72);Ontology_term=KEGG_ENZYME:2.1.1.72
1	287890	288546	657	hypothetical protein
1	288562	289563	1002	hypothetical protein
1	291029	291196	168	hypothetical protein
1	291222	291923	702	hypothetical protein
1	292545	292934	390	lipoprotein2C putative
1	293075	293464	390	lipoprotein2C putative
1	294018	295688	1671	FIG01118680: hypothetical protein
1	295669	295854	186	hypothetical protein
1	295997	296305	309	hypothetical protein
1	296537	296821	285	ESAT-6/Esx family secreted protein EsxA/YukE
1	296935	299922	2988	Putative secretion accessory protein EsaA/YueB
1	299934	300398	465	hypothetical protein
1	300464	300703	240	Putative secretion accessory protein EsaB/YukD
1	300704	301975	1272	Putative secretion system component EssB/YukC
1	301996	306396	4401	FtsK/SpoIIIE family protein2C putative secretion system component EssC/YukA
2	960717	963833	3117	Phage tail length tape-measure protein
2	963857	963982	126	hypothetical protein
2	964021	964440	420	hypothetical protein
2	964443	965021	579	Prophage pi2 protein 39
2	965036	965353	318	prophage pi2 protein 38
2	965350	965718	369	hypothetical protein
2	965705	965917	213	hypothetical protein
2	966049	966330	282	conserved hypothetical protein TIGR01560
2	966339	967520	1182	Phage major capsid protein
2	967534	968217	684	Prophage Clp protease-like protein
2	968210	969472	1263	Phage portal protein
2	969560	971152	1593	Phage terminase large subunit
2	971149	971622	474	Phage terminase small subunit
2	971672	971887	216	FIG01114614: hypothetical protein
2	971967	972089	123	hypothetical protein
2	972346	973368	1023	DNA-cytosine methyltransferase (EC 2.1.1.37);Ontology_term=KEGG_ENZYME:2.1.1.37
2	973365	974624	1260	Adenine-specific methyltransferase (EC 2.1.1.72);Ontology_term=KEGG_ENZYME:2.1.1.72
2	975265	975423	159	Phage endonuclease
2	975895	976530	636	hypothetical protein
2	977581	977808	228	hypothetical protein
2	977987	978337	351	Programmed cell death toxin YdcE
2	978349	978837	489	hypothetical protein
2	978830	980182	1353	DNA helicase2C phage-associated
2	980133	980444	312	Phage protein
2	980688	983042	2355	DNA primase2C phage associated
2	983053	984984	1932	FIG006036: phage encoded DNA polymerase I (EC 2.7.7.7);Ontology_term=KEGG_ENZYME:2.7.7.7
2	985020	985553	534	Phage protein
2	985555	986679	1125	Phage protein
2	986681	986977	297	rRNA biogenesis protein rrp52C putative
2	986991	987464	474	hypothetical protein
2	987685	989547	1863	hypothetical protein
2	989770	989961	192	hypothetical protein
2	990195	990899	705	hypothetical protein
2	990910	991218	309	hypothetical protein
2	991372	992136	765	Kynurenine formamidase2C bacterial (EC 3.5.1.9);Ontology_term=KEGG_ENZYME:3.5.1.9
2	992139	992432	294	hypothetical protein
2	992820	994250	1431	Long-chain-fatty-acid--CoA ligase (EC 6.2.1.3);Ontology_term=KEGG_ENZYME:6.2.1.3
2	994613	995221	609	Methyltransferase (EC 2.1.1.-);Ontology_term=KEGG_ENZYME:2.1.1.-
2	995223	995450	228	hypothetical protein
2	995453	996610	1158	3-oxoacyl-[acyl-carrier-protein] synthase2C KASII (EC 2.3.1.41);Ontology_term=KEGG_ENZYME:2.3.1.41
2	996620	997867	1248	3-oxoacyl-[acyl-carrier-protein] synthase2C KASII (EC 2.3.1.41);Ontology_term=KEGG_ENZYME:2.3.1.41
2	998099	998953	855	transcriptional regulator2C MutR family
2	999115	999570	456	hypothetical protein
2	999570	1000694	1125	Site-specific recombinase
2	1000904	1001443	540	PvuIIR( EC:3.1.21.4 );Ontology_term=KEGG_ENZYME:3.1.21.4
2	1001466	1002419	954	DNA methylase N-4/N-6 domain protein
2	1002752	1004107	1356	RNA methyltransferase2C TrmA family
2	1004182	1005156	975	Extracellular protein
2	1005243	1005818	576	Pneumococcal vaccine antigen A homolog
2	1005845	1006819	975	Pseudouridylate synthases2C 23S RNA-specific
2	1006827	1008083	1257	Serine hydroxymethyltransferase (EC 2.1.2.1);Ontology_term=KEGG_ENZYME:2.1.2.1
2	1008144	1008575	432	Phosphinothricin N-acetyltransferase (EC 2.3.1.-);Ontology_term=KEGG_ENZYME:2.3.1.-
2	1008577	1009179	603	YrdC/Sua5 family protein2C required for threonylcarbamoyladenosine (t(6)A) formation in tRNA
2	1009163	1009762	600	Methylase of polypeptide chain release factors
2	1009743	1010093	351	Methylase of polypeptide chain release factors
3	1425973	1426770	798	putative plasmid partition protein
3	1426893	1427477	585	Resolvase
3	1427918	1429555	1638	FIG01117230: hypothetical protein
3	1429562	1429936	375	hypothetical protein
3	1430140	1430400	261	hypothetical protein
3	1430466	1433690	3225	FIG01119357: hypothetical protein
3	1433677	1434036	360	hypothetical protein
3	1434103	1435944	1842	FIG01116251: hypothetical protein
3	1435945	1436463	519	hypothetical protein
3	1436539	1437552	1014	Extracellular protein
3	1437624	1438502	879	hypothetical protein
3	1438486	1438758	273	hypothetical protein
3	1438770	1439414	645	hypothetical protein
3	1439433	1442018	2586	conserved domain protein
3	1442030	1444363	2334	FIG01115039: hypothetical protein
3	1444350	1444706	357	hypothetical protein
3	1444777	1445196	420	hypothetical protein
3	1445242	1445973	732	hypothetical protein
3	1445995	1446219	225	hypothetical protein
3	1446225	1446557	333	bacterial seryl-tRNA synthetase related
3	1447326	1448153	828	conserved hypothetical protein
3	1448156	1448317	162	hypothetical protein
3	1448434	1449090	657	DNA alkylation repair enzyme
3	1449091	1449723	633	Two component transcriptional regulator VraR
3	1449734	1450732	999	Sensor histidine kinase VraS
3	1450729	1451427	699	Transporter associated with VraSR
3	1451595	1452596	1002	Isopentenyl-diphosphate delta-isomerase2C FMN-dependent (EC 5.3.3.2);Ontology_term=KEGG_ENZYME:5.3.3.2
3	1452580	1453587	1008	Phosphomevalonate kinase (EC 2.7.4.2);Ontology_term=KEGG_ENZYME:2.7.4.2
