# Supplementary material for: Nearly finished genomes produced using gel microdroplet culturing reveal substantial intraspecies genomic diversity within the human microbiome
Source: HighWire-hosted journal article supplement (doi:10.1101/gr.142208.112), 2013-03-14
Supplement: Supp_Table1_6.docx [file Supp_Table1_6.docx]

**Supplementary Table 1. Summary sequencing and assembly statistics.**

| - Species | - Type | - Sample Number | - Assembly - N50 (bp) | - Assembly - N90 (bp) | - Assembly largest contig (bp) | - Genome recovery (%)[[1]](#footnote-1) | - Contamination (%)[[2]](#footnote-2) | - Assembly Size (bp) | - Assembly # of Genes |
| --- | --- | --- | --- | --- | --- | --- | --- | --- | --- |
| - *Streptococcus sp.* | - GMD | - 1 | - 17747 | - 1258 | - 84106 | - 99.99 | - 46.3 | - 2099008 | - 1966 |
| - *Streptococcus sp.* | - GMD | - 2 | - 11409 | - 1019 | - 87416 | - 99.99 | - 23.5 | - 2047114 | - 1904 |
| - *Streptococcus sp.* | - GMD | - 3 | - 118244 | - 16338 | - 189903 | - 99.78 | - 12.8 | - 2033272 | - 1899 |
| - *Streptococcus sp.* | - GMD | - 4 | - 14172 | - 1323 | - 118766 | - 99.99 | - 25.2 | - 2301983 | - 2107 |
| - *Streptococcus sp.* | - GMD | - 5 | - 92264 | - 22036 | - 310185 | - 100 | - 2.0 | - 2027048 | - 1884 |
| - *Streptococcus sp.* | - GMD | - 6 | - 25566 | - 1993 | - 104077 | - 100 | - 49.2 | - 2264360 | - 2112 |
| - *Streptococcus sp.* | - SC | - 1 | - 18196 | - 2584 | - 33497 | - 44.2 | - 99.7 | - 101824 | - 115 |
| - *Streptococcus sp.* | - SC | - 2 | - 5137 | - 977 | - 26743 | - 46.95 | - 40.7 | - 172895 | - 151 |
| - *Streptococcus sp.* | - SC | - 3 | - 7627 | - 1024 | - 29102 | - 61.34 | - 68.2 | - 667094 | - 632 |
| - *Streptococcus sp.* | - SC | - 4 | - 7730 | - 897 | - 23068 | - 51.34 | - 93.2 | - 12196 | - 125 |
| - *Streptococcus sp.* | - SC | - 5 | - 14557 | - 991 | - 30919 | - 42.71 | - 83.4 | - 310065 | - 286 |
| - *Streptococcus sp.* | - SC | - 6 | - 4809 | - 1114 | - 24338 | - 36.86 | - 18.0 | - 148782 | - 153 |
| - *Enterococcus sp.* | - GMD | - 1 | - 20633 | - 6946 | - 133733 | - 100.00 | - 38.4 | - 2571293 | - 2576 |
| - *Enterococcus sp.* | - GMD | - 2 | - 54568 | - 13700 | - 143452 | - 100.00 | - 1.9 | - 2351463 | - 2323 |
| - *Enterococcus sp.* | - GMD | - 3 | - 62683 | - 13700 | - 147692 | - 100.00 | - 1.7 | - 2275066 | - 2270 |
| - *Enterococcus sp.* | - GMD | - 4 | - 55634 | - 14624 | - 147688 | - 100.00 | - 2.4 | - 2293879 | - 2276 |
| - *Enterococcus sp.* | - GMD | - 5 | - 54564 | - 13698 | - 147688 | - 100.00 | - 1.7 | - 2320035 | - 2310 |
| - *Enterococcus sp.* | - SC | - 1 | - 3147 | - 764 | - 18721 | - 60.11 | - 11.7 | - 722643 | - 782 |
| - *Enterococcus sp.* | - SC | - 2 | - 5528 | - 1266 | - 20924 | - 42.42 | - 8.6 | - 399794 | - 385 |
| - *Enterococcus sp.* | - SC | - 3 | - 1941 | - 639 | - 14896 | - 38.81 | - 12.7 | - 247179 | - 252 |
| - *Enterococcus sp.* | - SC | - 4 | - 3229 | - 879 | - 12516 | - 38.7 | - 13.1 | - 213577 | - 211 |
| - *Enterococcus sp.* | - SC | - 5 | - 3387 | - 608 | - 13273 | - 40.13 | - 21.6 | - 53186 | - 51 |
| - *Enterococcus sp.* | - SC | - 6 | - 1599 | - 636 | - 15773 | - 44.35 | - 14.9 | - 201413 | - 177 |

**Supplementary Table 2. Draft and finished Refseq genomes of closely related isolates.**

| **RefSeq Accession** | **Genome Name** | **Status** | **Number of protein coding genes** | **Genome Size (Mb)** |
| --- | --- | --- | --- | --- |
| NZ_AEEN00000000 | Streptococcus mitis ATCC 6249 | Draft | 1793 | 1.9 |
| NZ_AEDX00000000 | Streptococcus mitis NCTC 12261 | Draft | 1636 | 1.8 |
| NZ_AEDT00000000 | Streptococcus mitis SK321 | Draft | 1757 | 1.9 |
| NZ_AEDU00000000 | Streptococcus mitis SK564 | Draft | 1893 | 2 |
| NZ_AEDV00000000 | Streptococcus mitis SK597 | Draft | 1871 | 2 |
| NC_013853.1 | Streptococcus mitis B6 | Finished | 2006 | 2.1 |
| NZ_ADMV00000000 | Streptococcus oralis ATCC 35037 | Draft | 1847 | 1.9 |
| NZ_AEDW00000000 | Streptococcus oralis ATCC 35037 | Draft | 1793 | 1.9 |
| NC_013853.1 | Streptococcus oralis Uo5 | Finished | 1907 | 2 |
| NZ_ACAZ00000000 | Enterococcus faecium 1,141,733 | Draft | 2783 | 2.9 |
| NZ_ACAS00000000 | Enterococcus faecium 1,230,933 | Draft | 2951 | 3 |
| NZ_ACBB00000000 | Enterococcus faecium 1,231,408 | Draft | 2883 | 2.9 |
| NZ_ACBA00000000 | Enterococcus faecium 1,231,410 | Draft | 2932 | 2.9 |
| NZ_ACAY00000000 | Enterococcus faecium 1,231,501 | Draft | 2752 | 2.8 |
| NZ_ACAX00000000 | Enterococcus faecium 1,231,502 | Draft | 2830 | 2.9 |
| NZ_ACJQ00000000 | Enterococcus faecium C68 | Draft | 2886 | 2.9 |
| NZ_ACBC00000000 | Enterococcus faecium Com12 | Draft | 2606 | 2.7 |
| NZ_ACBD00000000 | Enterococcus faecium Com15 | Draft | 2724 | 2.8 |
| NZ_ACZZ00000000 | Enterococcus faecium D344SRF | Draft | 2678 | 2.7 |
| NZ_AAAK00000000 | Enterococcus faecium DO | Draft | 2721 | 2.8 |
| NZ_ACIY00000000 | Enterococcus faecium DO | Draft | 3114 | 2.8 |
| NZ_ACOS00000000 | Enterococcus faecium E1039 | Draft | 2587 | 2.5 |
| NZ_ABQI00000000 | Enterococcus faecium E1071 | Draft | 2714 | 2.7 |
| NZ_ABQJ00000000 | Enterococcus faecium E1162 | Draft | 2694 | 2.7 |
| NZ_ABRY00000000 | Enterococcus faecium E1636 | Draft | 2940 | 2.8 |
| NZ_ABSC00000000 | Enterococcus faecium E1679 | Draft | 3043 | 2.9 |
| NZ_ABQA00000000 | Enterococcus faecium E980 | Draft | 2869 | 2.8 |
| NZ_ACOB00000000 | Enterococcus faecium TC 6 | Draft | 2868 | 2.9 |
| NZ_AEBU00000000 | Enterococcus faecium TX0082 | Draft | 2813 | 2.7 |
| NZ_AECH00000000 | Enterococcus faecium TX0133A | Draft | 3118 | 2.9 |
| NZ_AECI00000000 | Enterococcus faecium TX0133B | Draft | 3110 | 2.9 |
| NZ_AEBG00000000 | Enterococcus faecium TX0133C | Draft | 3097 | 2.9 |
| NZ_AECJ00000000 | Enterococcus faecium TX0133a01 | Draft | 3262 | 3.1 |
| NZ_AEBC00000000 | Enterococcus faecium TX0133a04 | Draft | 3097 | 2.9 |
| NZ_ACHL00000000 | Enterococcus faecium TX1330 | Draft | 2777 | 2.7 |
| NZ_ABSW00000000 | Enterococcus faecium U0317 | Draft | 2965 | 2.9 |
| unpublished | Enterococcus faecium TX16 | Finished | 3114 | 3.1 |

**Supplementary Table 3. Summary sequencing and assembly statistics for *E. coli* controls.**

| - Type | - Sample Number | - Genome Recovery [[3]](#footnote-3)(%) | Number of gaps | - Contamination (%)[[4]](#footnote-4) | - Assembly - N50 (bp) | - Assembly - N90 (bp) | - Assembly largest contig (bp) | - Genome Recovery after assembly (%) |
| --- | --- | --- | --- | --- | --- | --- | --- | --- |
| - GMD | - 1 | - 97.08 | - 167 | - 0.0175 | - 54333 | - 7963 | - 178228 | - 96.87 |
| - GMD | - 2 | - 97.33 | - 52 | - 0.0201 | - 66231 | - 15368 | - 315249 | - 97.27 |
| - GMD | - 3 | - 66.20 | - 2536 | - 0.0170 | - 10496 | - 395 | - 93228 | - 61.12 |
| - GMD | - 4 | - 96.86 | - 162 | - 0.0497 | - 56361 | - 6921 | - 172481 | - 96.68 |
| - GMD | - 5 | - 96.31 | - 517 | - 0.0388 | - 32207 | - 933 | - 189790 | - 95.82 |
| - GMD | - 6 | - 97.29 | - 73 | - 0.0707 | - 64358 | - 9785 | - 207840 | - 97.23 |
| - SC | - 1 | - 70.48 | - 1911 | - 0.0265 | - 31862 | - 543 | - 189399 | - 66.74 |
| - SC | - 2 | - 53.32 | - 1872 | - 0.0277 | - 21844 | - 488 | - 92724 | - 49.69 |
| - SC | - 3 | - 72.52 | - 2279 | - 0.0203 | - 32047 | - 472 | - 175737 | - 67.75 |
| - SC | - 4 | - 72.45 | - 1843 | - 0.0467 | - 16956 | - 460 | - 105675 | - 69.61 |
| - SC | - 5 | - 18.90 | - 704 | - 0.2237 | - 17397 | - 348 | - 95104 | - 18.52 |
| - SC | - 6 | - 46.96 | - 1798 | - 0.0526 | - 8802 | - 348 | - 99871 | - 44.45 |

**Supplementary Table 4. Virulence related genes containing non-synonymous SNPs in *Streptococcus sp.* GMD-1 assembly.**

| **Gene Product** | **Function** | **Start** | **Stop** | **Number of mutations** | **Reference** |
| --- | --- | --- | --- | --- | --- |
| Response regulator of the competence regulon, ComE | Important in biofilm formation | 12020 | 12562 | 5 | ([Yoshida and Kuramitsu 2002](#_ENREF_17)) |
| Beta-hexosaminidase | Deglycosylation of host surface proteins | 50374 | 54405 | 1 | ([King et al. 2006](#_ENREF_9)) |
| DNA-entry nuclease | Degrades neutrophil extracellular traps | 233862 | 234686 | 1 | ([Buchanan et al. 2006](#_ENREF_4); [Beither et al. 2008](#_ENREF_2)) |
| Oligopeptide ABC transporter, OppA | Implicated in virulence | 236658 | 238637 | 3 | ([Wang et al. 2005](#_ENREF_15)) |
| Oligopeptide transport system permease protein, OppB | Implicated in virulence | 238704 | 240200 | 3 | ([Wang et al. 2005](#_ENREF_15)) |
| Oligopeptide transport system permease protein, OppC | Implicated in virulence | 240200 | 241126 | 3 | ([Wang et al. 2005](#_ENREF_15)) |
| Oligopeptide transport ATP-binding protein, OppD | Implicated in virulence | 241135 | 242202 | 6 | ([Wang et al. 2005](#_ENREF_15)) |
| Beta-hexosaminidase | Deglycosylation of host surface proteins | 381024 | 382838 | 16 | ([King et al. 2006](#_ENREF_9)) |
| Fibril-like structure subunit, FibA | Peptidoglycan synthesis, implicated in beta-lactamase resistance | 383240 | 385441 | 1 | ([Weber et al. 2000](#_ENREF_16)) |
| Sialidase | Implicated in virulence | 477864 | 481256 | 2 | ([Taylor 1996](#_ENREF_14)) |
| IgA1 protease | Cleaves human immunoglobulin A1 | 515697 | 524927 | 35 | ([Kilian et al. 1996](#_ENREF_8)) |
| Zinc metalloprotease, zmpB precursor | Implicated in virulence | 532211 | 537718 | 54 | ([Blue et al. 2003](#_ENREF_3)) |
| Choline binding protein A | Host colonization | 630459 | 632270 | 34 | ([Rosenow et al. 1997](#_ENREF_13)) |
| Sortase A, LPXTG specific | Anchors cell wall proteins | 791163 | 791909 | 3 | ([Mazmanian et al. 2000](#_ENREF_10)) |
| Mutator protein, mutT | Effects mutation rate | 1158934 | 1159413 | 9 | ([Polissi et al. 1998](#_ENREF_11)) |
| C5a peptidase precursor | Degrades neutrophil chemotaxin C5a | 1217204 | 1223635 | 73 | ([Ji et al. 1996](#_ENREF_7)) |
| ABC transporter membrane-spanning permease, Pep export, Vex3 | Involved in vancomycin resistance | 1231792 | 1233171 | 17 | ([Haas et al. 2004](#_ENREF_6)) |
| ABC transporter, ATP-binding protein Vex2 | Involved in vancomycin resistance | 1233222 | 1233869 | 6 | ([Rodriguez et al. 2004](#_ENREF_12)) |
| ABC transporter membrane-spanning permease, Pep export, Vex3 | Involved in vancomycin resistance | 1233882 | 1235159 | 25 | ([Haas et al. 2004](#_ENREF_6)) |
| Sialidase | Implicated in virulence | 1465833 | 1474082 | 28 | [Taylor 1996](#_ENREF_12)) |
| CRISPR-associated protein Cas7 | Implicated in resistance to bacteriophage and mobile genetic elements | 1731082 | 1732125 | 12 | ([Barrangou et al. 2007](#_ENREF_1)) |
| CRISPR-associated protein, Csn1 family | Implicated in resistance to bacteriophage and mobile genetic elements | 1733536 | 1736901 | 13 | ([Barrangou et al. 2007](#_ENREF_1)) |
| Mutator protein, mutT | Effects mutation rate | 1836623 | 1837075 | 6 | [Polissi et al. 1998](#_ENREF_9)) |
| Choline binding protein A | Host colonization | 1948580 | 1951504 | 44 | [Rosenow et al. 1997](#_ENREF_11)) |
| Choline binding protein D | Host colonization | 1951620 | 1952741 | 17 | ([Gosink et al. 2000](#_ENREF_5)) |

Barrangou R, Fremaux C, Deveau H, Richards M, Boyaval P, Moineau S, Romero DA, Horvath P. 2007. CRISPR Provides Acquired Resistance Against Viruses in Prokaryotes. *Science* 315(5819): 1709-1712.

Beither K, Wartha F, Albiger B, Normark S, Zychlinsky A, Henriques-Normark B. 2008. An endonuclease allows Streptococcus pneumoniae to escape neutrophil extracellular traps. *Current Biology* 16: 401-407.

Blue CE, Paterson GK, Kerr AR, Berge M, Claverys JP, Mitchell TJ. 2003. ZmpB, a novel virulence factor of Streptococcus pneumoniae that induces tumor necrosis factor alpha production in the respiratory tract. *Infection and Immunity* 71(9): 4925-4935.

Buchanan JT, Simpson AJ, Aziz RK, Liu GY, Kristian SA, Kotb M, Feramisco J, Nizet V. 2006. DNase expression allows the pathogen group A streptococcus to escape killing in neutrophil extracellular traps. *Current Biology* 16(4): 396-400.

Gosink KK, Mann ER, Guglielmo C, Tuomanen EI, Masure HR. 2000. Role of novel choline binding proteins in virulence of Streptococcus pneumoniae. *Infection and Immunity* 68(10): 5690-5695.

Haas W, Sublett J, Kaushal D, Tuomanen EI. 2004. Revising the role of the pneumococcal vex-vncRS locus in vancomycin tolerance. *Journal of Bacteriology* 186(24): 8463-8471.

Ji YD, McLandsborough L, Kondagunta A, Cleary PP. 1996. C5a peptidase alters clearance and trafficking of group A streptococci by infected mice. *Infection and Immunity* 64(2): 503-510.

Kilian M, Reinholdt J, Lomholt H, Poulsen K, Frandsen EVG. 1996. Biological significance of IgA1 proteases in bacterial colonization and pathogenesis: Critical evaluation of experimental evidence. *Apmis* 104(5): 321-338.

King SJ, Hippe KR, Weiser JN. 2006. Deglycosylation of human glycoconjugates by the sequential activities of exoglycosidases expressed by Streptococcus pneumoniae. *Molecular Microbiology* 59(3): 961-974.

Mazmanian SK, Liu G, Jensen ER, Lenoy E, Schneewind O. 2000. Staphylococcus aureus sortase mutants defective in the display of surface proteins and in the pathogenesis of animal infections. *Proceedings of the National Academy of Sciences of the United States of America* 97(10): 5510-5515.

Polissi A, Pontiggia A, Feger G, Altieri M, Mottl H, Ferrari L, Simon D. 1998. Large-scale identification of virulence genes from Streptococcus pneumoniae. *Infection and Immunity* 66(12): 5620-5629.

Rodriguez CA, Atkinson R, Bitar W, Whitney CG, Edwards KM, Mitchell L, Li JA, Sublett J, Li CS, Liu TB et al. 2004. Tolerance to vancomycin in pneumococci: Detection with a molecular marker and assessment of clinical impact. *Journal of Infectious Diseases* 190(8): 1481-1487.

Rosenow C, Ryan P, Weiser JN, Johnson S, Fontan P, Ortqvist A, Masure HR. 1997. Contribution of novel choline-binding proteins to adherence, colonization and immunogenicity of Streptococcus pneumoniae. *Molecular Microbiology* 25(5): 819-829.

Taylor G. 1996. Sialidases: Structures, biological significance and therapeutic potential. *Current Opinion in Structural Biology* 6(6): 830-837.

Wang CH, Lin CY, Luo YH, Tsai PJ, Lin YS, Lin MT, Chuang WJ, Liu CC, Wu JJ. 2005. Effects of oligopeptide permease in group A streptococcal infection. *Infection and Immunity* 73(5): 2881-2890.

Weber B, Ehlert K, Diehl A, Reichmann P, Labischinski H, Hakenbeck R. 2000. The fib locus in Streptococcus pneumoniae is required for peptidoglycan crosslinking and PBP-mediated beta-lactam resistance. *Fems Microbiology Letters* 188(1): 81-85.

Yoshida A, Kuramitsu HK. 2002. Multiple Streptococcus mutans genes are involved in biofilm formation. *Applied and Environmental Microbiology* 68(12): 6283-6291.

**Supplementary Table 5. Classification of bacteria cultured in GMDs.**

| Sample | Phylum | RDP Classifier Result | Sequenced genome with most similar 16S rDNA sequence | % Similarity to closest sequenced genome |
| --- | --- | --- | --- | --- |
| FIT_179435_a2 | Actinobacteria | Kocuria | *Kocuria rhizophila* NC_010617.1 | 97% |
| FIT_179438_e7 | Actinobacteria | Propionibacterium | *Propionibacterium sp.*  NZ_JH376566.1 | 99% |
| FIT_179450_c1 | Bacteroidetes | Unclassified Flavobacteriaceae | *Chryseobacterium gleum* NZ_GL379784.1 | 93% |
| FIT_179435_d10 | Bacteroidetes | Planobacterium | *Chryseobacterium gleum*  NZ_GL379784.1 | 90% |
| FIT_179453_b2 | Alpha-Proteobacteria | Methylobacterium | *Methylobacterium radiotolerans* NC_010505.1 | 100% |
| FIT_179438_g1 | Alpha-Proteobacteria | Paracoccus | *Paracoccus denitrificans* NC_008687.1 | 98% |
| FIT_179426_d11 | Gamma-Proteobacteria | Acinetobacter | *Acinetobacter lwoffii* NZ_GG705085.1 | 99% |
| FIT_179459_g6 | Gamma-Proteobacteria | Enhydrobacter | *Psychrobacter sp.* NZ_GL892052.1 | 94% |
| FIT_179450_d4 | Firmicutes | Unclassified Lachnospiraceae | *Eubacterium rectale* NC_012781.1 | 90% |
| FIT_179456_d3 | Firmicutes | Lachnospiracea *incertae sedis* | *Eubacterium rectale* NC_012781.1 | 99% |
| FIT_179456_d9 | Firmicutes | Ruminococcus | *Clostridium leptum* NZ_DS480348.1 | 94% |
| FIT_179459_h4 | Firmicutes | Faecalibacterium | Faecalibacterium prausnitzii NZ_DS483490.1 | 99% |
| FIT_179453_e10 | Firmicutes | Enterococcus | *Enterococcus faecium* NZ_GG703576.1 | 97% |
| FIT_179456_h6 | Firmicutes | Unclassified Lactobacillales | *Enterococcus faecium* NZ_GG703576.1 | 92% |
| FIT_179456_f3 | Firmicutes | Melissococcus | *Enterococcus faecium* NZ_GG703576.1 | 92% |
| FIT_179432_c8 | Firmicutes | Unclassified Lactobacillales | *Enterococcus faecium* NZ_GG703576.1 | 89% |
| FIT_179426_a7 | Firmicutes | Unclassified Lactobacillales | *Enterococcus faecium* NZ_GG703576.1 | 91% |
| FIT_179459_a3 | Firmicutes | Unclassified Lactobacillales | *Enterococcus faecium* NZ_GG703576.1 | 91% |

**Supplementary Table 6. Accession numbers for GMD samples.**

| - Species | - Type | - Sample Number | - Accession Number for Illumina-only assemblies | - Accession Number for hybrid Illumina + PacBio |
| --- | --- | --- | --- | --- |
| - *Streptococcus sp.* | - GMD | - 1 | - AJQY00000000.1 | - NA |
| - *Streptococcus sp.* | - GMD | - 2 | - AJRA00000000.1 | - NA |
| - *Streptococcus sp.* | - GMD | - 3 | AJRC00000000.2* | AJRC00000000.1 |
| - *Streptococcus sp.* | - GMD | - 4 | - AJRE00000000.1 | - NA |
| - *Streptococcus sp.* | - GMD | - 5 | - AJRG00000000.2* | AJRG00000000.1 |
| - *Streptococcus sp.* | - GMD | - 6 | - AJRH00000000.1 | - NA |
| - *Enterococcus sp.* | - GMD | - 1 | - AJQX00000000.1 | - NA |
| - *Enterococcus sp.* | - GMD | - 2 | - AJQZ00000000.1 | - NA |
| - *Enterococcus sp.* | - GMD | - 3 | - AJRB00000000.1 | - NA |
| - *Enterococcus sp.* | - GMD | - 4 | - AJRD00000000.1 | - NA |
| - *Enterococcus sp.* | - GMD | - 5 | - AJRF00000000.1 | - AJRF00000000.2 |

*Submitted later.

1. All Streptococcus reads mapped to GMD-5 assembly. All Enterococcus reads mapped to GMD-5. [↑](#footnote-ref-1)
2. Total bp of contigs considered to be contamination. [↑](#footnote-ref-2)
3. All *E. coli* reads mapped to reference genome *E. coli* (accessionNC_000913). [↑](#footnote-ref-3)
4. Proportion of reads that do not map to reference. [↑](#footnote-ref-4)
